# Supplementary material for: Epigenetic silencing by SETDB1 suppresses tumour intrinsic immunogenicity
Source: Springer Nature journal article supplement (doi:10.1038/s41586-021-03520-4), 2021-05-05
Supplement: MOESM3 [file 41586_2021_3520_MOESM3_ESM.xlsx]

## Sheet: Overview
Supplementary Table 2 | Screening data in LLC and B16
	Tumor model	Comparison
Table_S2a	LLC	WT_PD1_CTLA4 vs NSG
Table_S2b	LLC	WT_notx vs NSG
Table_S2c	LLC	NSG vs in_vitro_D15
Table_S2d	LLC	in_vitro_D15 vs input
Table_S2e	B16	WT_GVAX_PD1 vs NSG
Table_S2f	B16	WT_notx vs NSG
Table_S2g	B16	NSG vs in_vitro_D12
Table_S2h	B16	in_vitro_D15 vs input

## Sheet: S2a. LLC WT_PD1_CTLA4 vs NSG
	Fold-change		STARS - enriched						STARS depleted
Gene Symbol	Average LFC	Average -log(p-values)	Ranks of perturbations enriched	STARS Score enriched	Average Score enriched	p-value enriched	FDR enriched	q-value enriched	Ranks of perturbations depleted	STARS Score depleted	Average Score depleted	p-value depleted	FDR depleted	q-value depleted
1500002F19Rik	0.0998204	0.476164	1359;3551	0.486041	0.317448	0.720979	0.987545	0.960405	2664;4856	0.30995	0.174712	0.793449	1	0.99152		Tumor Model:	LLC
A1cf	0.0481886	0.576543	504;2492;2560;2589;4534;4895	0.812992	0.494234	0.412867	0.910397	0.909777	1320;1681;3626;3655;3723;5711	0.731237	0.418614	0.488574	1	0.99152		Screening conditions compared in this tab:	WT mice that received anti-PD1 and anti-CTLA4 treatment taken down on D15 compared to untreated NSG mice taken down on D12
A730035I17Rik	-0.0324649	0.621144	1119;2028;4003;4375;4486;5309	0.618274	0.41215	0.603593	0.975171	0.960405	906;1729;1840;2212;4187;5096	1.00044	0.532414	0.279865	0.932507	0.928944
Abraxas1	-0.0359577	0.574205	1059;2485;2686;3719;5125;5644	0.529294	0.369717	0.694039	0.995951	0.960405	571;1090;2496;3529;3730;5156	0.72838	0.492235	0.491459	1	0.99152
Abraxas2	-0.000626763	0.55242	1359;1983;3329;3551;4404;5140	0.531991	0.420721	0.691618	0.996797	0.960405	1075;1811;2664;2886;4232;4856	0.698584	0.473553	0.52062	1	0.99152
Actl6a	0.186807	0.907051	1;1109;3505;3875;4570;5583	3.01557	0.777596	0.00336594	0.118596	0.118596	632;1645;2340;2710;5106;6214	0.763131	0.386752	0.457728	1	0.99152
Actl6b	-0.058188	0.662603	879;2240;3980;4807;4808;5506	0.612299	0.400139	0.609893	0.969273	0.960405	709;1407;1408;2235;3975;5336	0.987478	0.567926	0.287572	0.935599	0.932175
Actr3b	0.113859	0.78988	706;1899;2137;2457;2750;4128	1.24583	0.676955	0.165796	0.707624	0.707624	2087;3465;3758;4078;4316;5509	0.748031	0.460195	0.472242	1	0.99152
Actr5	-0.221148	1.18019	399;1987;4594;5823;5973;6040	1.3392	0.574049	0.136176	0.657458	0.655715	175;242;392;1621;4228;5816	2.38412	1.01101	0.0138273	0.233653	0.233653
Actr6	0.0703763	0.659597	252;2630;2942;3162;3848;4363	0.921516	0.565403	0.329721	0.865322	0.864575	1852;2367;3053;3273;3585;5963	0.78984	0.428777	0.433127	1	0.99152
Actr8	-0.262282	1.53942	3170;3785;5018;5752;5780;5848	1.21558	0.711887	0.176889	0.725069	0.725069	367;435;463;1197;2430;3045	2.18322	1.31877	0.021529	0.304718	0.304718
Adar	-0.225431	1.39954	2917;3729;5169;5446;5686;5753	1.26163	0.657599	0.160598	0.703571	0.703571	462;529;769;1046;2486;3298	2.07936	1.19904	0.0273213	0.359079	0.359079
Adnp	-0.500142	2.71645	3997;5155;5872;6032;6062;6133	2.55076	1.30369	0.00924155	0.196205	0.196205	82;153;183;343;1060;2218	3.90554	2.32556	0.000318841	0.0155294	0.0153714
Aebp2	-0.0676216	0.652649	1267;2570;2842;3985;5475;5692	0.517957	0.36808	0.703551	0.995795	0.960405	523;740;2230;3373;3645;4948	0.892454	0.55943	0.3504	0.988521	0.988521
Aicda	0.0080613	0.500955	394;1463;1647;3838;4802;5874	0.830224	0.429496	0.398487	0.897815	0.897815	341;1413;2377;4568;4752;5821	0.605022	0.408292	0.617495	1	0.99152
Aire	0.112294	0.765311	652;768;1050;2738;3430;5308	1.25667	0.655896	0.162267	0.705286	0.70426	907;2785;3477;5165;5447;5563	0.690304	0.410424	0.529226	1	0.99152
Alkbh1	0.10849	0.734051	511;1261;2677;3058;3254;3944	1.18461	0.629162	0.189022	0.738255	0.738255	2271;2961;3157;3538;4954;5704	0.646725	0.415506	0.573934	1	0.99152
Anp32a	0.125513	0.816966	240;428;1792;2151;3549;5528	1.27173	0.700164	0.157376	0.696829	0.696829	687;2666;4064;4423;5787;5975	0.635021	0.390976	0.585963	1	0.99152
Anp32b	0.235811	1.33772	128;361;1555;1748;2205;3096	1.81542	1.14621	0.0489783	0.413816	0.412599	3119;4010;4467;4660;5854;6087	1.03476	0.570291	0.260539	0.92388	0.920769
Anp32e	0.022454	0.63281	236;976;1154;3776;4026;6067	1.16013	0.542439	0.199529	0.750955	0.750955	148;2189;2439;5061;5239;5979	0.897302	0.441359	0.347007	0.983979	0.983979
Apbb1	0.076724	0.845492	2234;2271;2362;2595;2652;3854	1.31251	0.724565	0.143975	0.669725	0.669725	2361;3563;3620;3853;3944;3981	1.16027	0.615629	0.199452	0.892681	0.890426
Apex1	0.0647705	0.666783	164;2640;3060;3828;3999;4258	0.984994	0.57158	0.28903	0.826656	0.826656	1957;2216;2387;3155;3575;6051	0.794257	0.441166	0.429262	1	0.99152
Apobec1	-0.099043	0.847063	1675;2534;4656;4844;5042;5403	0.877456	0.456897	0.36135	0.88259	0.880799	812;1173;1371;1559;3681;4540	1.47691	0.725911	0.10124	0.735325	0.733502
Apobec2	0.0783222	0.628223	603;1428;2619;3535;3774;4274	0.97522	0.53851	0.294994	0.832215	0.832215	1941;2441;2680;3596;4787;5612	0.540386	0.39863	0.683773	1	0.99152
Apobec3	-0.0149821	0.571035	411;2280;3144;4771;4987;5065	0.551166	0.43317	0.673232	0.991879	0.960405	1150;1228;1444;3071;3935;5804	0.944941	0.489483	0.314408	0.962403	0.958011
Arid1a	0.0909451	0.706016	955;1648;1966;3402;3598;3789	1.28908	0.60513	0.151339	0.681027	0.679681	2426;2617;2813;4249;4567;5260	0.705136	0.447511	0.514081	1	0.99152
Arid1b	0.0529111	0.643533	1320;2454;2591;3025;3532;4340	0.935289	0.551591	0.320697	0.855192	0.855192	1875;2683;3190;3624;3761;4895	0.715862	0.488838	0.503476	1	0.99152
Arid2	-0.186788	1.40379	3667;4432;4908;5006;5293;5360	1.38762	0.731452	0.122475	0.612743	0.612554	855;922;1209;1307;1783;2548	2.32303	1.20269	0.0155568	0.247712	0.247712
Arid3a	0.170074	0.991739	553;781;1640;1798;2796;3786	1.29114	0.84986	0.15065	0.683496	0.679681	2429;3419;4417;4575;5434;5662	0.760171	0.481072	0.460514	1	0.99152
Arid3b	0.107972	0.691065	472;835;1864;2774;4046;4689	0.817957	0.592342	0.408647	0.907131	0.907076	1526;2169;3441;4351;5380;5743	0.520294	0.364224	0.701697	1	0.99152
Arid3c	0.0597343	0.579658	695;1933;2452;3356;4198;4456	0.866556	0.496902	0.369775	0.884896	0.880799	1759;2017;2859;3763;4282;5520	0.537836	0.405537	0.686196	1	0.99152
Arid4a	-0.382137	1.66714	2072;3638;4887;5873;5959;6191	1.44319	0.653463	0.108748	0.577199	0.575796	24;256;342;1328;2577;4143	2.55076	1.42814	0.00924155	0.18219	0.18219
Arid4b	-0.0460373	0.600977	1400;1990;2513;4319;5166;5641	0.553663	0.370862	0.670772	0.99267	0.960405	574;1049;1896;3702;4225;4815	0.719835	0.515174	0.499605	1	0.99152
Arid5a	-0.0780961	0.787415	2064;3301;3452;4526;4859;5368	0.689483	0.441887	0.530057	0.953066	0.953066	847;1356;1689;2763;2914;4151	1.14111	0.674846	0.207494	0.892494	0.890663
Arid5b	-0.217835	1.1796	1678;3819;4599;4774;5958;5972	0.903015	0.51105	0.342822	0.872065	0.868577	243;257;1441;1616;2396;4537	1.66416	1.0107	0.067529	0.611082	0.609728
Arntl	0.201532	1.25201	316;508;606;934;3516;4591	2.25748	1.07262	0.0182114	0.269268	0.267292	1624;2699;5281;5609;5707;5899	1.3814	0.57679	0.124301	0.754	0.751708
Arrb1	-0.192186	1.45288	4121;4576;4691;4744;5303;5496	1.76323	0.761608	0.0548068	0.436346	0.436346	719;912;1471;1524;1639;2094	2.83437	1.24473	0.00489614	0.121015	0.120394
Asf1a	0.131823	0.818547	220;986;1824;2301;2626;5318	1.33075	0.70154	0.138664	0.663665	0.659259	897;3589;3914;4391;5229;5995	0.797672	0.396732	0.426284	1	0.99152
Asf1b	0.158983	0.888679	86;1236;1662;2217;3868;4052	1.11421	0.76167	0.219967	0.780013	0.777777	2163;2347;3998;4553;4979;6129	0.61696	0.381511	0.605058	1	0.99152
Ash1l	0.270028	1.66481	163;493;1042;1312;1743;2095	2.83312	1.42627	0.00491546	0.148	0.148	4120;4472;4903;5173;5722;6052	1.7623	0.768816	0.054849	0.543892	0.543892
Ash2l	-0.0635993	0.632661	1659;1940;3202;3903;4604;5944	0.506369	0.361089	0.712841	0.988663	0.960405	271;1611;2312;3013;4275;4556	0.808725	0.542335	0.416559	1	0.99152
Asxl1	0.0563793	0.705712	71;888;1468;4798;5097;5373	1.18892	0.604972	0.187444	0.737311	0.736602	842;1118;1417;4747;5327;6144	0.962179	0.429065	0.3035	0.950087	0.950087
Asxl2	0.0222024	0.510468	1250;1322;2261;3232;4894;5213	0.605515	0.437624	0.617051	0.967648	0.960405	1002;1321;2983;3954;4893;4965	0.584712	0.424746	0.638745	1	0.99152
Asxl3	0.0458695	0.548926	180;1415;2690;3061;4685;5546	0.823777	0.470619	0.403965	0.902788	0.902788	669;1530;3154;3525;4800;6035	0.536318	0.358968	0.687606	1	0.99152
Atad2	0.0309233	0.544316	1301;1478;2395;4013;4336;4698	0.728749	0.46662	0.491116	0.94349	0.94349	1517;1879;2202;3820;4737;4914	0.620663	0.442201	0.601077	1	0.99152
Atad2b	0.0499485	0.531628	513;1248;2546;3783;4236;5149	0.60768	0.455771	0.614752	0.967709	0.960405	1066;1979;2432;3669;4967;5702	0.568142	0.370353	0.655994	1	0.99152
Atf2	0.0426086	0.672527	2105;2156;2754;2997;3599;4245	0.992961	0.576422	0.284296	0.823066	0.820753	1970;2616;3218;3461;4059;4110	1.07718	0.544513	0.237876	0.916098	0.906866
Atf7ip	-0.454997	2.28168	3585;4338;5781;5893;6034;6170	2.26372	1.02015	0.0179734	0.275593	0.267292	45;181;322;434;1877;2630	3.51032	1.95395	0.000892512	0.0351905	0.0350698
Atf7ip2	0.0645943	0.618749	1177;1766;2314;3325;3465;4568	0.844385	0.530369	0.387133	0.887939	0.885857	1647;2750;2890;3901;4449;5038	0.547159	0.436812	0.67721	1	0.99152
Atm	0.110386	0.870299	1646;1718;1914;2380;2624;3780	1.33216	0.745819	0.138281	0.663751	0.659259	2435;3591;3835;4301;4497;4569	0.801301	0.550906	0.422941	1	0.99152
Atn1	-0.0492707	0.760528	1917;2603;4175;4461;4577;4792	0.677127	0.480911	0.542601	0.955902	0.955902	1423;1638;1754;2040;3612;4298	1.10451	0.651797	0.22447	0.897879	0.897879
Atr	-0.00809605	0.526795	1221;1513;2406;4249;4700;5483	0.57322	0.394902	0.650837	0.990612	0.960405	732;1515;1966;3809;4702;4994	0.693893	0.451623	0.525478	1	0.99152
Atrx	-0.35072	2.14066	3672;5464;5487;5608;5843;5989	2.60887	1.05091	0.00826208	0.187425	0.187425	226;372;607;728;751;2543	3.86645	1.83336	0.000335749	0.0154444	0.0154444
Atxn7	0.0960561	0.656782	197;961;2051;2811;3987;5346	0.79071	0.563	0.432449	0.927637	0.926543	869;2228;3404;4164;5254;6018	0.51711	0.338577	0.704266	1	0.99152
Atxn7l3	-0.0284641	0.686294	2050;2210;3518;4385;4511;4763	0.692944	0.464367	0.526548	0.956101	0.951723	1452;1704;1830;2697;4005;4165	1.04254	0.588223	0.256132	0.9261	0.920769
Aurka	0.0157171	0.508188	802;1616;3234;4189;4299;5009	0.561721	0.430437	0.662506	0.991962	0.960405	1206;1916;2026;2981;4599;5413	0.673259	0.435658	0.546514	1	0.99152
Aurkb	0.000659507	0.572978	97;1427;3564;4580;5333;5389	1.06261	0.491269	0.245391	0.798365	0.795743	826;882;1635;2651;4788;6118	0.836332	0.469222	0.393504	1	0.99152
Aurkc	0.00716465	0.535078	84;1747;2851;3512;4862;5930	1.12049	0.458783	0.217064	0.778048	0.77654	285;1353;2703;3364;4468;6131	0.662324	0.40798	0.557871	1	0.99152
Babam1	0.0289238	0.515128	635;857;3028;3558;4328;5580	0.802488	0.441625	0.421845	0.915565	0.915565	635;1887;2657;3187;5358;5580	0.608583	0.39439	0.613816	1	0.99152
Babam2	-0.0544181	0.648554	700;2428;4073;4602;4629;5633	0.637604	0.399455	0.583405	0.969998	0.960405	582;1586;1613;2142;3787;5515	1.04124	0.555894	0.256795	0.924461	0.920769
Bahd1	0.0863457	0.702243	1069;1770;2586;2706;3435;3990	1.15439	0.601889	0.201829	0.757887	0.757887	2225;2780;3509;3629;4445;5146	0.630426	0.459555	0.590707	1	0.99152
Banp	-0.0684557	0.618224	761;2648;3283;4113;4958;5905	0.529575	0.354077	0.693814	0.996493	0.960405	310;1257;2102;2932;3567;5454	0.797807	0.529951	0.426097	1	0.99152
Bap1	-0.416877	2.24621	4548;4701;5311;5816;6009;6130	2.21588	1.0415	0.0201751	0.278417	0.2764	85;206;399;904;1514;1667	3.42861	1.92387	0.00111957	0.0394468	0.0394468
Bard1	0.0316182	0.569161	336;1083;1490;4499;4736;5588	0.916709	0.487935	0.333109	0.864621	0.864575	627;1479;1716;4725;5132;5879	0.796587	0.409998	0.42708	1	0.99152
Baz1a	-0.167145	1.0325	2203;2743;4214;5459;5494;5819	0.87979	0.475274	0.359594	0.880899	0.880799	396;721;756;2001;3472;4012	1.61253	0.884744	0.0754191	0.637214	0.636761
Baz1b	0.137804	0.801334	158;878;2559;2782;3440;4219	1.00897	0.686837	0.275068	0.814869	0.814869	1996;2775;3433;3656;5337;6057	0.556383	0.373346	0.667971	1	0.99152
Baz2a	0.165965	0.990235	462;1152;1432;1571;2664;4145	1.46583	0.848559	0.103649	0.566475	0.566475	2070;3551;4644;4783;5063;5753	0.870822	0.483665	0.366488	1	0.99152
Baz2b	0.187562	1.20566	726;929;1015;1116;2018;4323	1.97868	1.03298	0.0341002	0.34858	0.346515	1892;4197;5099;5200;5286;5489	1.19492	0.610184	0.184818	0.869483	0.867482
Bcor	0.0335082	0.56411	1579;2030;2044;3223;4186;4906	0.667347	0.483558	0.552572	0.961197	0.958949	1309;2029;2992;4171;4185;4636	0.763367	0.459142	0.457486	1	0.99152
Bcorl1	0.128474	0.86597	1029;1230;1930;2507;3148;3333	1.62322	0.742133	0.0738635	0.485389	0.481984	2882;3067;3708;4285;4985;5186	0.908857	0.491988	0.338777	0.975677	0.974885
Bmi1	-0.0796289	0.837994	2287;3113;4159;4400;4801;5156	0.663795	0.478964	0.556226	0.96049	0.958949	1059;1414;1815;2056;3102;3928	1.1952	0.718159	0.184671	0.871271	0.867482
Bptf	0.0541091	0.587905	192;2282;2285;3055;4816;4991	0.800071	0.504007	0.42406	0.919168	0.919168	1224;1399;3160;3930;3933;6023	0.650331	0.384613	0.570205	1	0.99152
Brca1	0.174346	1.00132	375;517;1290;2828;2967;3607	1.41735	0.858086	0.114819	0.594187	0.593739	2608;3248;3387;4925;5698;5840	0.78064	0.459315	0.441329	1	0.99152
Brca2	0.119694	0.793303	120;882;1257;2806;3257;5654	1.07553	0.679939	0.238656	0.790428	0.790428	561;2958;3409;4958;5333;6095	0.604931	0.376885	0.617678	1	0.99152
Brcc3	-0.0508494	0.652314	1532;2350;3296;4387;5120;5275	0.50998	0.394869	0.709843	0.99366	0.960405	940;1095;1828;2919;3865;4683	0.747063	0.559128	0.473118	1	0.99152
Brd1	-0.460262	2.92753	5347;5505;5607;5950;6007;6012	3.56387	1.51845	0.000807971	0.0446	0.0446	203;208;265;608;710;868	5.12911	2.50644	2.41546e-05	0.00235294	0.00235294
Brd2	-0.204086	1.30369	3159;4282;4740;4970;5409;5830	1.17681	0.620948	0.192424	0.742783	0.739824	385;806;1245;1475;1933;3056	1.91937	1.11702	0.0390085	0.436473	0.436473
Brd3	0.0642009	0.564262	365;1636;2468;3453;3958;5059	0.641358	0.483731	0.579475	0.969303	0.960405	1156;2257;2762;3747;4579;5850	0.521314	0.362173	0.700841	1	0.99152
Brd4	-0.423461	2.14777	3197;4524;5592;5927;6031;6146	1.83512	0.957073	0.0467911	0.414364	0.409426	69;184;288;623;1691;3018	2.91121	1.83938	0.00417391	0.113311	0.113311
Brd7	-0.0734346	0.715728	1476;2972;3702;4384;4982;5508	0.594787	0.399156	0.628198	0.974973	0.960405	707;1233;1831;2513;3243;4739	0.954439	0.613445	0.308312	0.957906	0.954793
Brd8	0.128081	0.830071	817;1392;1670;2081;3604;3733	1.32788	0.711383	0.139379	0.663253	0.659259	2482;2611;4134;4545;4823;5398	0.727566	0.457916	0.492287	1	0.99152
Brd9	-0.0888927	0.755306	2441;2473;3247;3907;5178;5799	0.711074	0.398756	0.508139	0.945481	0.944038	416;1037;2308;2968;3742;3774	1.29942	0.64738	0.148021	0.814359	0.811802
Brdt	0.0815541	0.73223	1423;1546;2691;2996;3455;3636	1.39648	0.627574	0.120483	0.608293	0.608293	2579;2760;3219;3524;4669;4792	0.768103	0.497803	0.452888	1	0.99152
Brms1	-0.166997	1.01938	2178;3707;3919;4397;5792;5855	0.849474	0.464507	0.382971	0.883287	0.883287	360;423;1818;2296;2508;4037	1.41653	0.873532	0.115449	0.755668	0.751708
Brms1l	0.181832	1.22668	889;1346;1510;1525;1657;3189	2.22678	1.05101	0.0197633	0.279726	0.2764	3026;4558;4690;4705;4869;5326	1.39035	0.66074	0.12185	0.758586	0.751708
Brpf1	0.0640651	0.620735	491;551;2962;3818;4540;4836	1.08965	0.532098	0.231548	0.777777	0.777777	1379;1675;2397;3253;5664;5724	0.592123	0.39801	0.630995	1	0.99152
Brpf3	0.0558086	0.604698	1358;1475;2231;2517;3561;5313	0.844904	0.518318	0.386686	0.888144	0.885857	902;2654;3698;3984;4740;4857	0.642019	0.435319	0.578751	1	0.99152
Brwd1	0.0485603	0.537013	813;1228;2689;3373;3896;5248	0.663868	0.460365	0.556168	0.961392	0.958949	967;2319;2842;3526;4987;5402	0.536148	0.386906	0.687778	1	0.99152
Brwd3	0.146553	0.873637	360;512;2147;3176;3276;3735	1.32648	0.748729	0.139734	0.659259	0.659259	2480;2939;3039;4068;5703;5855	0.726753	0.421568	0.493028	1	0.99152
Bub1	0.108317	0.719844	205;1545;2014;2273;3282;5258	0.966526	0.617002	0.300745	0.841274	0.838811	957;2933;3942;4201;4670;6010	0.602823	0.371807	0.619896	1	0.99152
Carm1	0.216698	1.35307	516;819;1353;1573;1754;2658	2.2129	1.15929	0.0203732	0.276541	0.2764	3557;4461;4642;4862;5396;5699	1.31014	0.671175	0.144563	0.811512	0.809336
Cbx1	0.227414	1.46347	628;796;950;980;1809;3013	2.18156	1.25377	0.0216256	0.281984	0.278169	3202;4406;5235;5265;5419;5587	1.3301	0.73043	0.138772	0.806337	0.806337
Cbx2	0.0187679	0.478886	770;1416;2693;3119;4446;5645	0.626753	0.410571	0.594661	0.975974	0.960405	570;1769;3096;3522;4799;5445	0.536829	0.396752	0.687159	1	0.99152
Cbx3	-0.0266172	0.663647	704;3198;3822;4322;4728;4817	0.663568	0.464176	0.556492	0.958949	0.958949	1398;1487;1893;2393;3017;5511	1.07946	0.568802	0.236909	0.914503	0.906866
Cbx3-ps6	-0.183446	0.647864	4817	0.110595	0.0552973	0.909267	0.973333	0.973333	1398	0.647864	0.323932	0.572711	1	0.99152
Cbx3-ps7	-0.183446	0.647864	4817	0.110595	0.0552973	0.909267	0.973333	0.973333	1398	0.647864	0.323932	0.572711	1	0.99152
Cbx3-ps8	-0.183446	0.647864	4817	0.110595	0.0552973	0.909267	0.973333	0.973333	1398	0.647864	0.323932	0.572711	1	0.99152
Cbx4	-0.024729	0.581712	736;2943;3405;3761;4421;5553	0.587834	0.403514	0.635574	0.979079	0.960405	662;1794;2454;2810;3272;5479	0.939367	0.498643	0.317957	0.960832	0.958011
Cbx5	-0.169393	0.952975	2379;2383;2479;5306;5574;6056	0.768896	0.432009	0.452223	0.931445	0.931445	159;641;909;3736;3832;3836	1.40945	0.816699	0.116934	0.756414	0.751708
Cbx6	0.0441672	0.618697	885;2778;3033;3056;3756;4417	0.889463	0.530326	0.352627	0.875487	0.875487	1798;2459;3159;3182;3437;5330	0.857603	0.48274	0.376746	1	0.99152
Cbx7	-0.00514339	0.570879	1174;2784;2859;3165;4766;5177	0.614327	0.426854	0.607797	0.9706	0.960405	1038;1449;3050;3356;3431;5041	0.860459	0.489365	0.374559	1	0.99152
Cbx8	0.106934	0.712136	147;926;2043;2375;3714;5539	0.913046	0.610417	0.335844	0.867641	0.867641	676;2501;3840;4172;5289;6068	0.579762	0.352543	0.643908	1	0.99152
Cdc6	0.135043	0.79231	85;1046;2209;2583;4241;4295	1.11571	0.679134	0.219216	0.780692	0.777777	1920;1974;3632;4006;5169;6130	0.542891	0.354003	0.681372	1	0.99152
Cdc73	-0.199512	1.19979	40;1801;4301;5928;5991;6084	1.57977	0.716548	0.0810048	0.498677	0.497007	131;224;287;1914;4414;6175	2.76705	1.02767	0.00561473	0.12737	0.12737
Cdk1	-0.151512	1.15245	1803;4697;4715;4868;5057;5524	1.51655	0.601989	0.0929686	0.534569	0.534569	691;1158;1347;1500;1518;4412	2.40399	0.987417	0.013337	0.232484	0.232484
Cdk17	0.082723	0.640901	963;1033;1891;2994;4132;4603	0.781982	0.549354	0.440086	0.930756	0.930756	1612;2083;3221;4324;5182;5252	0.506905	0.395897	0.712382	1	0.99152
Cdk2	0.181854	1.12821	446;677;1327;1508;1802;4783	2.05867	0.966693	0.0288708	0.318733	0.316553	1432;4413;4707;4888;5538;5769	1.27261	0.545548	0.156818	0.824413	0.821636
Cdk5	0.111165	0.733392	281;708;2656;3444;4018;4061	1.10843	0.628624	0.22257	0.780881	0.777777	2154;2197;2771;3559;5507;5934	0.6062	0.384352	0.616293	1	0.99152
Cdk7	-0.0631136	0.650151	1811;2047;2456;3326;3957;6079	0.641714	0.403695	0.579028	0.971499	0.960405	136;2258;2889;3759;4168;4404	0.929734	0.557342	0.324368	0.966104	0.965382
Cdk9	0.167518	1.18557	208;759;1055;1365;1583;5711	2.319	1.01579	0.0156461	0.264388	0.264388	504;4632;4850;5160;5456;6007	1.45577	0.591992	0.105912	0.74634	0.74634
Cdyl	0.108497	0.710229	651;762;1761;2835;4154;4438	0.877104	0.608749	0.361829	0.882457	0.880799	1777;2061;3380;4454;5453;5564	0.515248	0.385464	0.705704	1	0.99152
Cdyl2	0.0309007	0.553111	1295;1349;2120;2934;3570;5733	0.796474	0.47413	0.427146	0.922235	0.922235	482;2645;3281;4095;4866;4920	0.608437	0.436237	0.613941	1	0.99152
Cecr2	0.112814	0.812521	552;1347;1800;2076;2245;5423	1.62731	0.696325	0.0730012	0.485502	0.481984	792;3970;4139;4415;4868;5663	0.982464	0.457865	0.290688	0.934718	0.934718
Cenpa	0.0848687	0.686844	226;506;1701;3732;4917;5112	1.1499	0.588747	0.203748	0.761639	0.761639	1103;1298;2483;4514;5709;5989	0.591139	0.377712	0.632075	1	0.99152
Cenpc1	0.147597	0.919076	594;1445;1858;2223;2478;3723	1.43916	0.78762	0.10962	0.578121	0.578121	2492;3737;3992;4357;4770;5621	0.863386	0.484493	0.372158	1	0.99152
Chaf1a	-0.03935	0.63033	611;3228;3538;3661;5132;5458	0.66591	0.414341	0.55406	0.960758	0.958949	757;1083;2554;2677;2987;5604	1.0971	0.540284	0.228062	0.903517	0.903517
Chaf1b	-0.0373349	0.619727	1835;1847;2164;2795;4313;6025	0.730811	0.424798	0.489117	0.947343	0.94349	190;1902;3420;4051;4368;4380	0.911383	0.531275	0.336862	0.97355	0.97355
Chd1	0.332349	2.26057	68;345;445;653;744;2929	3.88622	1.936	0.00032971	0.0237391	0.0237391	3286;5471;5562;5770;5870;6147	2.62405	1.05894	0.00799638	0.163481	0.163481
Chd1l	0.223599	1.33224	323;685;816;1672;1699;3708	2.17645	1.14144	0.021837	0.278169	0.278169	2507;4516;4543;5399;5530;5892	1.35488	0.616506	0.131504	0.77775	0.77775
Chd2	0.204844	1.23026	309;633;1047;1396;1844;4507	2.01279	1.0541	0.0319287	0.336777	0.336777	1708;4371;4819;5168;5582;5906	1.24087	0.56711	0.167583	0.830892	0.829266
Chd3	0.166288	1.01777	660;672;920;1556;3920;3952	1.4797	0.872113	0.100697	0.561461	0.561107	2263;2295;4659;5295;5543;5555	0.879128	0.500521	0.360158	1	0.99152
Chd4	-0.128983	0.815976	80;1058;1551;5233;5589;6189	1.14027	0.556196	0.208013	0.772354	0.77	26;626;982;4664;5157;6135	1.60935	0.699424	0.0761715	0.637071	0.637071
Chd5	0.174379	0.951591	136;555;1422;2227;3316;4525	1.08459	0.815523	0.234072	0.779928	0.779928	1690;2899;3988;4793;5660;6079	0.614357	0.393839	0.607742	1	0.99152
Chd6	0.0610082	0.584597	359;1373;2056;2366;4607;5518	0.917607	0.501142	0.332566	0.867291	0.864575	697;1608;3849;4159;4842;5856	0.58166	0.369576	0.641947	1	0.99152
Chd7	-0.0141598	0.53086	1011;1814;2230;4398;4704;5570	0.613325	0.388739	0.608749	0.970248	0.960405	645;1511;1817;3985;4401;5204	0.751663	0.455104	0.468763	1	0.99152
Chd8	-0.244711	1.20595	2840;3188;4824;4869;4886;6165	0.979931	0.504751	0.292109	0.829729	0.82924	50;1329;1346;1391;3027;3375	1.64419	1.03341	0.0703998	0.626785	0.619109
Chd9	0.157169	0.992305	277;296;1091;2144;2920;5469	1.55285	0.85029	0.085872	0.513372	0.51295	746;3295;4071;5124;5919;5938	0.687489	0.454994	0.532079	1	0.99152
Chek1	-0.170413	1.04951	1704;3528;4390;5270;5596;5790	0.772655	0.483416	0.44869	0.933455	0.931354	425;619;945;1825;2687;4511	1.36772	0.899317	0.128111	0.768667	0.768667
Chrac1	-0.207898	1.16746	2447;3587;4787;4956;5513;6003	0.955735	0.512817	0.307518	0.840347	0.838811	212;702;1259;1428;2628;3768	1.60528	1.00038	0.0767198	0.638432	0.638432
Chtop	-0.042478	0.735826	2031;2224;4102;4330;4703;4737	0.707207	0.476457	0.512013	0.945255	0.944038	1478;1512;1885;2113;3991;4184	1.05876	0.630644	0.247226	0.917951	0.917951
Chuk	-0.00273125	0.666832	1342;3191;3474;3639;4352;4395	0.902474	0.504793	0.34336	0.872092	0.868577	1820;1863;2576;2741;3024;4873	1.07538	0.571535	0.238767	0.915273	0.906866
Cir1	0.0162653	0.501356	1205;1354;2952;3632;4490;5195	0.574354	0.422249	0.649597	0.990545	0.960405	1020;1725;2583;3263;4861;5010	0.58973	0.429822	0.633638	1	0.99152
Cit	-0.183622	1.13534	3446;3562;4272;4279;5277;6005	1.23393	0.527985	0.170034	0.712851	0.712851	210;938;1936;1943;2653;2769	2.10629	0.972888	0.0259444	0.346484	0.346484
Clns1a	0.0306019	0.537847	987;1591;2491;4190;4502;4592	0.788216	0.461088	0.434473	0.927175	0.92696	1623;1713;2025;3724;4624;5228	0.673591	0.4361	0.546237	1	0.99152
Clock	-0.040992	0.664164	358;3117;3393;4923;5032;5190	0.632898	0.457524	0.588219	0.971176	0.960405	1025;1183;1292;2822;3098;5857	1.04899	0.569245	0.252676	0.925735	0.920769
Cop1	-0.570511	3.26326	4663;5767;5889;6060;6086;6148	3.46101	1.64215	0.00105556	0.0563871	0.0554375	67;129;155;326;448;1552	4.96481	2.79295	2.89855e-05	0.00266667	0.00266667
Coro2a	0.156156	0.95158	751;1040;1190;2494;2643;3787	1.3188	0.815453	0.141975	0.664153	0.664153	2428;3572;3721;5025;5175;5464	0.790582	0.487694	0.432514	1	0.99152
Crb2	-0.0899581	0.857465	2721;3415;3553;3759;5084;5525	0.831355	0.47156	0.397618	0.897079	0.897079	690;1131;2456;2662;2800;3494	1.50029	0.734857	0.0961739	0.717405	0.717211
Crebbp	-0.258224	1.74707	3459;5151;5240;5443;5548;5682	2.05422	0.88144	0.0290556	0.316553	0.316553	533;667;772;975;1064;2756	3.13556	1.49653	0.0022343	0.0685185	0.0677818
Csnk2a1	-0.00632102	0.585655	1214;2803;3084;3808;4261;5096	0.557363	0.432145	0.667	0.989742	0.960405	1119;1954;2407;3131;3412;5001	0.869563	0.502014	0.367592	1	0.99152
Csnk2a3	-0.0763056	0.710975	2803;3808;4261;5096	0.525157	0.346652	0.69764	0.996801	0.960405	1119;1954;2407;3412	1.04145	0.568738	0.256635	0.9259	0.920769
Cstf1	0.0142763	0.522893	1352;2093;2311;3533;4035;5391	0.614601	0.430428	0.607513	0.971083	0.960405	824;2180;2682;3904;4122;4863	0.638802	0.448271	0.582152	1	0.99152
Ctbp1	0.177466	1.04182	523;797;1749;1897;2609;3376	1.58981	0.892757	0.0794686	0.496604	0.496604	2839;3606;4318;4466;5418;5692	0.887542	0.507459	0.353942	0.991756	0.99152
Ctbp2	0.0903363	0.684873	922;1533;1536;3353;3748;4237	0.997877	0.587016	0.281453	0.819132	0.819132	1978;2467;2862;4679;4682;5293	0.55107	0.423342	0.673345	1	0.99152
Ctcf	-0.317099	2.03331	4735;4853;5257;5599;5663;5941	2.45692	1.01351	0.0115628	0.220092	0.220092	274;552;616;958;1362;1480	3.73866	1.74163	0.000556763	0.0249189	0.0249189
Ctcfl	0.130963	0.781949	420;945;1499;2770;3364;4473	0.911348	0.670188	0.33696	0.869168	0.868233	1742;2851;3445;4716;5270;5795	0.567234	0.385027	0.656944	1	0.99152
Ctr9	0.0636879	0.720726	177;569;1442;2296;5017;5923	1.06726	0.617759	0.242954	0.793554	0.792287	292;1198;3919;4773;5646;6038	0.654351	0.424715	0.566011	1	0.99152
Cul1	-0.0533579	0.709379	1623;3053;3289;4624;4671;5183	0.615385	0.432558	0.606641	0.971565	0.960405	1032;1544;1591;2926;3162;4592	0.997682	0.607996	0.281507	0.932352	0.928944
Cul2	0.0349151	0.627667	60;999;2742;2758;5138;5915	1.25814	0.538112	0.161751	0.706755	0.70426	300;1077;3457;3473;5216;6155	0.676867	0.401546	0.542943	1	0.99152
Cul3	-0.688942	3.94527	4487;6013;6059;6128;6150;6157	4.81317	2.0456	4.83092e-05	0.00666667	0.00615385	58;65;87;156;202;1728	6.6763	3.3732	0	0	0
Cul4a	-0.0466534	0.641996	313;712;3066;4865;5687;5797	0.917094	0.471002	0.332952	0.86557	0.864575	418;528;1350;3149;5503;5902	1.11964	0.550306	0.21744	0.904724	0.897879
Cul4b	-0.00392212	0.542496	1095;2298;2768;3275;5052;5179	0.586892	0.409822	0.636564	0.979693	0.960405	1036;1163;2940;3447;3917;5120	0.656147	0.465057	0.564168	1	0.99152
Cul5	-0.53291	3.42205	5639;5739;5870;5934;5971;6121	4.43253	1.81254	0.000103865	0.00955556	0.00955556	94;244;281;345;476;576	6.19769	2.92894	1.20773e-06	0.000153846	0.000153846
Cxxc1	0.193992	1.125	344;856;1281;1963;2401;3323	1.63105	0.964013	0.0724734	0.489861	0.481984	2892;3814;4252;4934;5359;5871	0.91388	0.522757	0.335036	0.971664	0.971664
Dapk3	0.312841	2.12393	141;599;618;827;1194;1563	3.59647	1.81922	0.000753623	0.0430345	0.0430345	4652;5021;5388;5597;5616;6074	2.34603	1.03791	0.0149336	0.242451	0.242451
Daxx	-0.221119	1.43936	957;5162;5167;5352;5421;5917	2.07044	0.723805	0.0277742	0.31077	0.31077	298;794;863;1048;1053;5258	3.1572	1.23299	0.00213043	0.066566	0.066566
Ddb1	0.287553	1.81883	114;151;456;793;1674;4426	2.51888	1.55782	0.0103043	0.2133	0.2133	1789;4541;5422;5759;6064;6101	1.56054	0.800433	0.0847222	0.677778	0.662757
Ddb2	-0.00856758	0.565463	641;2865;3305;3913;4657;5119	0.570226	0.424298	0.653849	0.991551	0.960405	1096;1558;2302;2910;3350;5574	0.899879	0.484713	0.345156	0.982093	0.980429
Ddx1	0.0196587	0.518393	1375;1857;2412;3425;3767;5477	0.713464	0.439831	0.505662	0.947258	0.944038	738;2448;2790;3803;4358;4840	0.651155	0.444419	0.569296	1	0.99152
Ddx10	0.0315307	0.578926	98;2270;2861;4411;4554;5228	1.05851	0.496344	0.247634	0.796276	0.796276	987;1661;1804;3354;3945;6117	0.757172	0.417147	0.463407	1	0.99152
Ddx17	-0.14225	0.957255	1925;3522;3930;5000;5530;5678	0.770257	0.456332	0.450861	0.932117	0.931354	537;685;1215;2285;2693;4290	1.28423	0.820319	0.152996	0.814669	0.813936
Ddx18	0.207	1.28803	57;393;429;1876;2673;5495	2.27492	1.10352	0.0175217	0.281709	0.267292	720;3542;4339;5786;5822;6158	1.27173	0.541482	0.157376	0.824728	0.821636
Ddx21	-0.0112916	0.680605	2023;2116;3894;3912;4100;4680	0.738752	0.494427	0.481225	0.944204	0.943265	1535;2115;2303;2321;4099;4192	1.0257	0.583343	0.26555	0.935638	0.920769
Ddx23	0.115084	0.934764	35;135;1894;3945;4266;5791	2.18814	0.800933	0.0214082	0.281365	0.278169	424;1949;2270;4321;6080;6180	0.935454	0.438102	0.320566	0.958227	0.958227
Ddx24	-0.0203413	0.538439	647;1465;3219;3967;5385;5462	0.546052	0.389536	0.678231	0.990432	0.960405	753;830;2248;2996;4750;5568	0.82156	0.46159	0.405909	1	0.99152
Ddx27	0.0232808	0.833702	92;172;2727;5224;5457;5613	1.98836	0.714441	0.0335133	0.344708	0.344708	602;758;991;3488;6043;6123	1.31722	0.582207	0.142692	0.812021	0.809336
Ddx28	0.176207	1.05107	191;1509;1859;1997;2843;2981	1.91406	0.900714	0.0393865	0.381427	0.38064	3234;3372;4218;4356;4706;6024	1.10125	0.501363	0.226086	0.902164	0.900149
Ddx31	-0.176269	1.09972	1820;4115;4500;5072;5372;5884	1.06735	0.509849	0.242819	0.79468	0.792287	331;843;1143;1715;2100;4395	1.75672	0.942333	0.0553611	0.545702	0.544231
Ddx39	0.0501259	0.572	799;1686;2834;3779;4147;4367	0.919128	0.490344	0.331335	0.866809	0.864575	1848;2068;2436;3381;4529;5416	0.56738	0.423134	0.656832	1	0.99152
Ddx3x	0.184307	1.22632	23;247;364;2860;4224;5623	2.47443	1.05061	0.0111848	0.217906	0.216395	592;1991;3355;5851;5968;6192	1.3954	0.510561	0.120772	0.760449	0.751708
Ddx41	0.0982017	0.714585	481;714;1503;2129;4687;5204	1.04905	0.612472	0.25263	0.804531	0.801977	1011;1528;4086;4712;5501;5734	0.641388	0.392051	0.579423	1	0.99152
Ddx42	0.195303	1.25139	83;298;556;1179;4157;5336	1.96598	1.07212	0.0352886	0.356329	0.356329	879;2058;5036;5659;5917;6132	1.1395	0.541783	0.208321	0.891421	0.890663
Ddx46	0.0810093	0.610744	348;1193;1911;3654;4057;4935	0.714101	0.523553	0.50512	0.947314	0.944038	1280;2158;2561;4304;5022;5867	0.54602	0.353751	0.678296	1	0.99152
Ddx47	-0.0541675	0.675556	1735;2698;2957;4402;5039;5329	0.537857	0.40383	0.68618	0.993281	0.960405	886;1176;1813;3258;3517;4480	0.852559	0.579039	0.380543	1	0.99152
Ddx49	0.167275	1.13734	171;216;356;3408;3932;5201	2.5016	0.974283	0.0106268	0.217259	0.215488	1014;2283;2807;5859;5999;6044	1.41239	0.520914	0.116304	0.758268	0.751708
Ddx50	0.0697613	0.591822	285;1311;2571;2712;4661;5038	0.762345	0.507351	0.458479	0.935027	0.935027	1177;1554;3503;3644;4904;5930	0.527691	0.358075	0.69544	1	0.99152
Ddx51	-0.040694	0.679169	1540;2918;3554;4327;4509;5118	0.582017	0.433421	0.641571	0.985568	0.960405	1097;1706;1888;2661;3297;4675	0.926545	0.582117	0.326458	0.965382	0.965382
Ddx54	-0.225681	1.26713	2831;4173;4246;5047;5710;5997	1.10387	0.558232	0.224739	0.786825	0.777777	218;505;1168;1969;2042;3384	1.81145	1.08574	0.0492331	0.516013	0.51556
Ddx56	0.0538623	0.574611	1108;1758;2067;3208;3521;5187	0.81851	0.492555	0.408231	0.908642	0.907076	1028;2694;3007;4148;4457;5107	0.53717	0.417919	0.686789	1	0.99152
Ddx6	-0.0570418	0.753278	497;667;1501;5349;5778;5877	0.959652	0.549386	0.304909	0.84155	0.838811	338;437;866;4714;5548;5718	1.46207	0.645609	0.104341	0.744776	0.744776
Dek	0.0778935	0.624841	771;1309;1566;3365;4252;4643	0.873024	0.535602	0.364802	0.883205	0.880799	1572;1963;2850;4649;4906;5444	0.525669	0.390392	0.697238	1	0.99152
Dhx15	-0.0254734	0.716996	7;2148;3871;4849;4872;6041	2.17257	0.614715	0.0224384	0.283649	0.283649	174;1343;1366;2344;4067;6208	0.996158	0.563612	0.282322	0.929475	0.928944
Dhx29	0.195622	1.15181	391;410;669;2740;3009;3557	1.75121	0.986911	0.0560314	0.441848	0.441848	2658;3206;3475;5546;5805;5824	0.958664	0.523467	0.305686	0.955125	0.954793
Dhx30	0.029607	0.551442	1395;2292;2309;3244;3679;5211	0.749449	0.472701	0.470987	0.938573	0.937856	1004;2536;2971;3906;3923;4820	0.661945	0.460548	0.55821	1	0.99152
Dhx33	0.0357998	0.580698	290;687;3029;3238;5356;5367	0.940265	0.497832	0.317539	0.85088	0.85088	848;859;2977;3186;5528;5925	0.801112	0.411403	0.423124	1	0.99152
Dhx34	0.146816	0.8645	460;463;1920;2783;3624;3870	1.23396	0.740888	0.17	0.714518	0.712851	2345;2591;3432;4295;5752;5755	0.67394	0.416969	0.545866	1	0.99152
Dhx36	0.342423	2.30889	111;153;437;752;940;2384	3.3943	1.97736	0.00121256	0.0608485	0.0608485	3831;5275;5463;5778;6062;6104	2.24903	1.08199	0.0185882	0.279836	0.279836
Dhx57	0.0327927	0.543661	1070;1469;1923;2464;4403;5675	0.869511	0.46604	0.367652	0.886218	0.880799	540;1812;3751;4292;4746;5145	0.562363	0.421062	0.661909	1	0.99152
Dhx8	-0.0235796	0.752155	2607;2820;3118;4042;4321;4559	0.80701	0.523458	0.417963	0.914328	0.912725	1656;1894;2173;3097;3395;3608	1.41663	0.644635	0.115389	0.75827	0.751708
Dhx9	0.0220664	0.5286	1137;1466;1575;4025;4782;5234	0.868083	0.453154	0.368624	0.88727	0.880799	981;1433;2190;4640;4749;5078	0.623891	0.436781	0.597615	1	0.99152
Dido1	-0.220732	1.36187	3637;3709;4468;5366;5655;5845	1.36576	0.634234	0.128508	0.631484	0.631484	370;560;849;1747;2506;2578	2.29253	1.16685	0.0169275	0.261981	0.261981
Dmap1	0.0391523	0.66621	320;520;2020;2122;4827;5999	1.13046	0.571035	0.212322	0.771066	0.771066	216;1388;4093;4195;5695;5895	0.75759	0.439393	0.463082	1	0.99152
Dnajc1	0.124192	0.804028	402;1906;2214;2299;3126;3931	1.19321	0.689096	0.185615	0.735354	0.734979	2284;3089;3916;4001;4309;5813	0.651417	0.437537	0.569083	1	0.99152
Dnajc2	0.349673	2.33652	22;31;129;521;3722;3978	3.77465	1.99882	0.000513285	0.034	0.034	2237;2493;5694;6086;6184;6193	2.23239	0.996777	0.0196292	0.287664	0.287664
Dnd1	-0.0251015	0.552914	1362;1934;2584;3954;4485;5736	0.5426	0.375451	0.681661	0.991942	0.960405	479;1730;2261;3631;4281;4853	0.644166	0.474005	0.576486	1	0.99152
Dnmt1	0.0762681	0.871245	2;664;3361;4579;5312;5929	2.71489	0.746906	0.0066872	0.181541	0.178848	286;903;1636;2854;5551;6213	0.83582	0.488259	0.39397	1	0.99152
Dnmt3a	-0.073713	0.736169	1710;3279;3397;4372;4396;5708	0.682221	0.414173	0.537465	0.958065	0.955032	507;1819;1843;2818;2936;4505	1.12769	0.630961	0.213773	0.896223	0.896223
Dnmt3b	0.0410572	0.559184	333;1707;2921;4283;4376;4693	0.731524	0.479396	0.488401	0.947063	0.94349	1522;1839;1932;3294;4508;5882	0.706236	0.406557	0.513123	1	0.99152
Dnmt3l	-0.103959	0.902116	2075;3536;4209;4678;5063;5299	0.775869	0.483129	0.445614	0.934096	0.931354	916;1152;1537;2006;2679;4140	1.29382	0.773078	0.149948	0.816822	0.813936
Dnttip2	0.163907	1.06442	671;1507;1711;2220;2551;2639	2.23159	0.912099	0.0196498	0.282957	0.2764	3576;3664;3995;4504;4708;5544	1.3223	0.572807	0.140976	0.810611	0.809336
Dot1l	0.493516	3.50664	4;8;149;349;1036;1763	4.60671	2.99465	7.6087e-05	0.0084	0.0084	4452;5179;5866;6066;6207;6211	2.52943	1.57352	0.0101135	0.192506	0.192506
Dpf1	0.136444	0.98045	753;1067;1118;1133;2696;5432	1.95532	0.840095	0.0360012	0.361321	0.359904	783;3519;5082;5097;5148;5462	1.17955	0.536221	0.191072	0.876499	0.873047
Dpf2	-0.0970631	0.878884	2400;3710;3817;4096;4976;5498	0.850851	0.475377	0.382017	0.886022	0.883194	717;1239;2119;2398;2505;3815	1.41878	0.753194	0.114547	0.75876	0.751708
Dpf3	0.261475	1.47632	43;329;719;1588;2195;3926	1.67079	1.2649	0.0666594	0.482044	0.480017	2289;4020;4627;5496;5886;6172	1.01074	0.581716	0.273931	0.939193	0.928944
Dppa3	-0.0793817	0.849331	186;4152;4259;4839;5053;5538	1.09047	0.552588	0.231185	0.778134	0.777777	677;1162;1376;1956;2063;6029	1.79143	0.727823	0.0511691	0.523062	0.523062
Dppa3-ps	-0.0167363	0.531855	186;4152;4259;5538	0.961392	0.416813	0.303948	0.841702	0.838811	677;1956;2063;6029	1.00977	0.425495	0.274349	0.934819	0.928944
Dpy30	-0.17507	0.88745	758;2592;4608;4738;5150;6141	0.851423	0.394429	0.381564	0.886213	0.883194	74;1065;1477;1607;3623;5457	1.43324	0.760586	0.111214	0.751714	0.749878
Dr1	-0.792595	4.73985	5763;6073;6081;6108;6162;6188	5.42045	2.54643	1.20773e-05	0.0025	0.00222222	27;53;107;134;142;452	7.4373	4.05121	0	0	0
Dtx3l	-0.102531	0.919607	2794;3501;3643;4380;5236;5302	0.865719	0.496279	0.370378	0.883784	0.880799	913;979;1835;2572;2714;3421	1.55531	0.788075	0.0855399	0.671346	0.662757
Dzip3	0.0803494	0.742149	720;794;866;4394;4561;4650	1.46207	0.636062	0.104341	0.566518	0.566518	1565;1654;1821;5349;5421;5495	0.797014	0.463114	0.42674	1	0.99152
E230016M11Rik	-0.220755	1.02711	2618;4095;5689;5876	0.586158	0.337575	0.637384	0.980045	0.960405	339;526;2120;3597	1.44344	0.821528	0.108643	0.746523	0.746523
E2f6	0.134404	0.805336	168;777;1918;2263;3134;5281	1.01303	0.690241	0.272579	0.81922	0.813595	934;3081;3952;4297;5438;6047	0.622911	0.371282	0.598622	1	0.99152
Eed	-0.160134	1.05115	2414;3950;4024;4220;5737;5768	0.971436	0.497628	0.2976	0.835298	0.835298	447;478;1995;2191;2265;3801	1.61025	0.900737	0.07575	0.636761	0.636761
Eef1akmt3	0.16475	0.966163	77;1189;2647;2682;3071;3293	1.65468	0.828047	0.0690628	0.482565	0.480017	2922;3144;3533;3568;5026;6138	0.929097	0.437437	0.324737	0.965465	0.965382
Eef1aknmt	0.0458351	0.575902	152;2539;2678;3328;3971;5510	0.887153	0.49372	0.354283	0.876969	0.876075	705;2244;2887;3537;3676;6063	0.750707	0.396608	0.469787	1	0.99152
Ehmt1	-0.104648	0.864477	2242;3443;4078;4097;5055;5622	0.739716	0.45118	0.480349	0.945848	0.943265	593;1160;2118;2137;2772;3973	1.2313	0.740861	0.17115	0.836059	0.834918
Ehmt2	-0.0595257	0.69694	169;529;4001;4892;5342;6027	1.1183	0.521378	0.217977	0.777953	0.777777	188;873;1323;2214;5686;6046	1.02632	0.597407	0.26525	0.936576	0.920769
Eid1	0.099707	0.667258	338;1549;1960;3078;3678;4601	0.783114	0.571958	0.43921	0.930092	0.930092	1614;2537;3137;4255;4666;5877	0.513521	0.365217	0.707013	1	0.99152
Eid2	-0.0885474	0.64123	852;2404;2436;4563;4831;6057	0.56738	0.352906	0.656832	0.990632	0.960405	158;1384;1652;3779;3811;5363	0.87249	0.549687	0.365251	1	0.99152
Eid2b	0.164569	0.957646	78;318;2569;2885;3918;3924	1.49705	0.820712	0.096744	0.546785	0.545442	2291;2297;3330;3646;5897;6137	0.65396	0.404839	0.566419	1	0.99152
Eif4a-ps4	-0.135587	0.763099	4496;4571	0.397863	0.221528	0.753958	0.984664	0.960405	1644;1719	1.11619	0.508695	0.21872	0.903242	0.897879
Eif4a1	0.0901191	0.668579	117;1777;1853;3727;4496;4571	0.988309	0.573136	0.287151	0.825559	0.824468	1644;1719;2488;4362;4438;6098	0.557918	0.366155	0.666467	1	0.99152
Eif4a2	0.0208183	0.520138	438;2403;2890;3503;4882;4890	0.624374	0.445933	0.597121	0.976142	0.960405	1325;1333;2712;3325;3812;5777	0.695739	0.425973	0.523575	1	0.99152
Eif4a3	-0.136796	1.01902	3122;3357;3461;5029;5354;5557	1.03645	0.513337	0.259523	0.807838	0.807838	658;861;1186;2754;2858;3093	1.81795	0.873222	0.0483551	0.510038	0.510038
Elp2	0.00580067	0.625822	1965;2407;2832;3867;3914;4776	0.685842	0.485461	0.533611	0.957378	0.955032	1439;2301;2348;3383;3808;4250	0.989894	0.536424	0.286198	0.936648	0.932175
Elp3	-0.0305295	0.58056	746;822;3210;4381;5449;5642	0.827393	0.416307	0.400944	0.898463	0.898463	573;766;1834;3005;5393;5469	0.87073	0.49769	0.366575	1	0.99152
Elp4	0.0148005	0.600014	1666;2308;2764;2824;3168;5586	0.99442	0.496497	0.283522	0.822263	0.820753	629;3047;3391;3451;3907;4549	0.812732	0.514333	0.41314	1	0.99152
Elp5	-0.0072232	0.51224	997;1305;2524;2993;5117;5759	0.663728	0.399391	0.556286	0.959594	0.958949	456;1098;3222;3691;4910;5218	0.667209	0.439174	0.55271	1	0.99152
Elp6	0.130558	0.950378	432;1270;1285;1368;2316;5595	1.66903	0.814375	0.0669674	0.480078	0.480017	620;3899;4847;4930;4945;5783	0.995473	0.511612	0.282722	0.928944	0.928944
Eny2	0.0787369	0.738637	79;587;3007;4612;4637;4638	1.14538	0.633169	0.205728	0.767311	0.767311	1577;1578;1603;3208;5628;6136	0.853012	0.418281	0.38032	1	0.99152
Ep300	-0.898252	5.81454	6115;6129;6139;6151;6153;6175	8.2175	3.29661	0	0	0	40;62;64;76;86;100	10.7602	4.95883	0	0	0
Ep400	-0.02713	0.735189	2365;2633;3509;4072;4472;4553	0.810442	0.502585	0.414909	0.91126	0.91126	1662;1743;2143;2706;3582;3850	1.24746	0.630102	0.165308	0.827039	0.826187
Epc1	0.0917601	0.693852	908;919;2058;2496;3050;5283	1.06034	0.594693	0.246495	0.798818	0.795743	932;3165;3719;4157;5296;5307	0.646759	0.413616	0.573822	1	0.99152
Epc2	-0.307707	1.89976	3666;4677;5523;5719;5788;5841	1.71424	0.923658	0.0607911	0.457591	0.456439	374;427;496;692;1538;2549	2.73952	1.62722	0.00597947	0.132027	0.130711
Erbb4	-0.0714735	0.723014	2057;2243;2710;4695;5355;5441	0.574942	0.410477	0.648942	0.990459	0.960405	774;860;1520;3505;3972;4158	1.04692	0.619698	0.253588	0.927024	0.920769
Ercc6	-0.00256806	0.633152	2101;2389;3110;3242;4268;4916	0.610556	0.476906	0.611691	0.96934	0.960405	1299;1947;2973;3105;3826;4114	1.07464	0.542707	0.239356	0.909115	0.906866
Esco1	-0.014969	0.803027	2827;3151;3334;3454;3615;4706	0.881674	0.583789	0.358343	0.88306	0.880799	1509;2600;2761;2881;3064;3388	1.58057	0.688202	0.0808647	0.666229	0.662757
Esco2	0.148733	0.877905	538;809;1408;2002;3765;4017	1.13682	0.752366	0.209482	0.77261	0.77	2198;2450;4213;4807;5406;5677	0.681682	0.43026	0.537958	1	0.99152
Etfbkmt	0.0399776	0.54997	1099;1644;2553;2636;4668;4930	0.793074	0.471457	0.430144	0.925088	0.925088	1285;1547;3579;3662;4571;5116	0.535571	0.423212	0.688371	1	0.99152
Exosc1	-0.0267062	0.555451	251;1004;3218;4806;5016;5838	0.713318	0.43564	0.505932	0.946694	0.944038	377;1199;1409;2997;5211;5964	0.967384	0.476178	0.300138	0.948527	0.946833
Exosc2	-0.445371	1.77491	631;3991;4223;5939;6116;6210	1.61062	0.685407	0.0756908	0.485829	0.485829	5;99;276;1992;2224;5584	2.81555	1.52011	0.00506643	0.121594	0.120394
Exosc3	-0.0328285	0.613462	122;2767;3448;4743;5048;5651	0.971917	0.462166	0.297263	0.835769	0.835298	564;1167;1472;2767;3448;6093	0.927589	0.525836	0.325679	0.96653	0.965382
Exosc4	0.204702	1.18257	137;182;936;1912;3137;4855	1.94215	1.01319	0.0369324	0.364048	0.364048	1360;3078;4303;5279;6033;6078	0.821731	0.483705	0.405558	1	0.99152
Exosc5	0.0382169	0.589574	64;1688;2291;3616;5225;5573	1.23152	0.505487	0.171065	0.715364	0.715364	642;990;2599;3924;4527;6151	0.720853	0.385401	0.498557	1	0.99152
Exosc6	-0.216677	1.09182	1065;3299;4913;4965;5653;6107	1.04233	0.46451	0.256232	0.805161	0.80422	108;562;1250;1302;2916;5150	1.74318	0.935592	0.0568551	0.544231	0.544231
Exosc7	-0.0167417	0.619132	1596;2008;2805;3010;3164;5963	0.996594	0.459992	0.282193	0.819846	0.819846	252;3051;3205;3410;4207;4619	0.77294	0.530741	0.44829	1	0.99152
Exosc8	-0.164139	0.984293	270;1341;5034;5184;5834;6046	1.13781	0.534272	0.209058	0.772768	0.77	169;381;1031;1181;4874;5945	1.89148	0.843421	0.0414444	0.448575	0.448575
Exosc9	0.100765	0.754111	705;935;1222;2411;3054;5566	1.10316	0.6463	0.225087	0.78638	0.777777	649;3161;3804;4993;5280;5510	0.64558	0.427092	0.575057	1	0.99152
Eya1	0.00749956	0.620618	949;2893;3600;3923;4141;4442	0.874756	0.493839	0.363607	0.881602	0.880799	1773;2074;2292;2615;3322;5266	0.91388	0.531946	0.335036	0.971664	0.971664
Eya2	-0.0907366	1.01856	3362;3641;3998;4469;4600;4873	1.17973	0.601452	0.191002	0.740749	0.739824	1342;1615;1746;2217;2574;2853	2.02842	0.872801	0.0305399	0.374622	0.374622
Eya3	0.10031	0.738041	1066;1594;1641;2053;3539;4622	1.09619	0.632538	0.228391	0.78795	0.777777	1593;2676;4162;4574;4621;5149	0.664759	0.444915	0.55522	1	0.99152
Eya4	0.024583	0.529656	426;1039;3346;4351;4483;5218	0.695264	0.454095	0.524143	0.952777	0.951723	997;1732;1864;2869;5176;5789	0.732392	0.416394	0.487448	1	0.99152
Ezh1	-0.00928528	0.549231	863;1595;1948;2538;5427;5822	0.835419	0.434742	0.394284	0.893207	0.893104	393;788;3677;4267;4620;5352	0.853165	0.470863	0.380178	1	0.99152
Ezh2	-0.127141	0.933017	2211;3475;4170;4491;5430;5590	0.751858	0.462354	0.468626	0.938385	0.937856	625;785;1724;2045;2740;4004	1.25249	0.799564	0.163518	0.828092	0.821636
Fbl	0.0365192	0.564902	570;1018;2090;2450;4208;5918	0.876173	0.48425	0.362502	0.881504	0.880799	297;2007;3765;4125;5197;5645	0.648812	0.403671	0.571815	1	0.99152
Fbrs	0.195728	1.19534	475;1183;1223;1356;2405;3179	1.74648	1.02421	0.0564867	0.443327	0.443327	3036;3810;4859;4992;5032;5740	1.00374	0.587957	0.278006	0.937633	0.928944
Fbrsl1	0.148097	1.12743	218;357;409;1498;4377;5713	2.33262	0.965871	0.0152657	0.263333	0.260742	502;1838;4717;5806;5858;5997	1.30731	0.55613	0.145641	0.809336	0.809336
Fbxl19	0.033636	0.523023	1073;1744;1916;3682;3915;5411	0.712212	0.448368	0.50697	0.947564	0.944038	804;2300;2533;4299;4471;5142	0.550394	0.417135	0.673989	1	0.99152
Fbxw9	0.187182	1.26964	38;566;581;871;4515;5468	2.36849	1.08778	0.01425	0.251043	0.251043	747;1700;5344;5634;5649;6177	1.45704	0.560255	0.105564	0.747068	0.74634
Foxa1	0.109338	0.760814	228;1147;1369;1825;3994;5532	1.25435	0.652077	0.162943	0.706372	0.70426	683;2221;4390;4846;5068;5987	0.748729	0.390617	0.471609	1	0.99152
Foxo1	0.0439265	0.584911	1493;1734;2267;2487;4374;4945	0.858714	0.501375	0.375803	0.885249	0.883194	1270;1841;3728;3948;4481;4722	0.715472	0.449577	0.503726	1	0.99152
Foxp1	0.100521	0.716995	502;1928;2504;2728;3104;4270	1.02971	0.614541	0.263309	0.80898	0.80898	1945;3111;3487;3711;4287;5713	0.631209	0.423177	0.58989	1	0.99152
Foxp2	-0.0486764	0.702879	1537;3385;3424;3544;5010;5243	0.718487	0.437284	0.500929	0.948043	0.944038	972;1205;2671;2791;2830;4678	1.19371	0.60243	0.18547	0.870079	0.867482
Foxp3	0.185872	1.06116	368;609;1374;1989;2958;3468	1.51975	0.909333	0.0923587	0.532913	0.532913	2747;3257;4226;4841;5606;5847	0.843448	0.483899	0.387816	1	0.99152
Foxp4	0.0866702	0.707481	607;845;1247;2161;4927;5217	1.08332	0.606379	0.23488	0.781048	0.781048	998;1288;4054;4968;5370;5608	0.632185	0.414912	0.588868	1	0.99152
Gadd45a	-0.293874	1.6356	2618;4095;5381;5689;5876;5980	1.50467	0.739462	0.0953587	0.544531	0.544502	235;339;526;834;2120;3597	2.43791	1.4011	0.0120688	0.214903	0.214903
Gadd45b	0.06789	0.677424	1624;1651;1860;2189;3398;5196	1.01362	0.580603	0.272308	0.819895	0.813595	1019;2817;4026;4355;4564;4591	0.788784	0.475266	0.434048	1	0.99152
Gadd45g	0.109535	0.928094	545;638;1027;1443;2984;5909	1.58985	0.795281	0.0794505	0.498371	0.496604	306;3231;4772;5188;5577;5670	0.9462	0.519815	0.313551	0.96513	0.958011
Gatad1	-0.225071	1.20436	627;3744;4452;5697;5815;6037	1.13457	0.551333	0.210576	0.771491	0.77	178;400;518;1763;2471;5588	2.0495	1.03185	0.0293599	0.368333	0.365835
Gatad2a	-0.238039	1.68288	4373;4911;4969;5035;5271;5745	2.01603	0.868375	0.0317114	0.336628	0.336628	470;944;1180;1246;1304;1842	3.16849	1.44164	0.00209058	0.0665769	0.066566
Gatad2b	-0.0708077	0.623995	665;2462;3488;4332;4441;5996	0.524891	0.363535	0.697897	0.996309	0.960405	219;1774;1883;2727;3753;5550	0.756492	0.5349	0.464099	1	0.99152
Gfi1	0.0238056	0.516881	1031;2117;2396;3566;4651;4809	0.667899	0.443119	0.552023	0.961251	0.958949	1406;1564;2649;3819;4098;5184	0.593701	0.435365	0.629264	1	0.99152
Gfi1b	-0.0377696	0.711929	2310;2978;3310;3347;4180;5442	0.660915	0.464581	0.559348	0.961869	0.960405	773;2035;2868;2905;3237;3905	1.2105	0.610192	0.17886	0.858528	0.858528
Glyr1	0.0939577	0.734519	187;2503;2753;2960;3005;4562	1.08648	0.629581	0.233158	0.781599	0.779928	1653;3210;3255;3462;3712;6028	0.735749	0.428487	0.484093	1	0.99152
Gm10093	0.297933	1.18941	659;923	1.65634	0.792827	0.0688539	0.4852	0.480017	5292;5556	0.597362	0.231527	0.625506	1	0.99152
Gm10257	0.375878	1.17637	414	1.17637	0.588185	0.192603	0.740023	0.739824	5801	0.0298684	0.0149342	0.97319	0.994816	0.994079
Gm10706	0.211835	0.656651	1370	0.656651	0.328325	0.563604	0.966178	0.960405	4845	0.108077	0.0540387	0.910984	1	0.99152
Gm11914	-0.181647	0.727714	3520;5569	0.308772	0.134653	0.794146	0.978501	0.960405	646;2695	0.729781	0.485135	0.489942	1	0.99152
Gm12261	0.0588228	0.338679	2849	0.338679	0.169339	0.779645	0.985566	0.960405	3366	0.266257	0.133129	0.815408	1	0.99152
Gm12355	0.181688	0.905567	601;1613;1768;3041	1.24142	0.724351	0.167354	0.708793	0.708793	3174;4447;4602;5614	0.621197	0.355508	0.600505	1	0.99152
Gm12387	0.421816	1.37177	264	1.37177	0.685884	0.126793	0.628653	0.626577	5951	0.0187813	0.00939065	0.982717	0.995949	0.995949
Gm12463	-0.22098	0.885185	2851;4862;5930	0.398386	0.213469	0.753763	0.985187	0.960405	285;1353;3364	0.953671	0.66385	0.308679	0.955462	0.954793
Gm12657	-0.41331	1.27428	4861;6024	0.467689	0.164887	0.727229	0.987125	0.960405	191;1354	1.32351	0.849457	0.1408	0.812418	0.809336
Gm12722	-0.148264	0.589794	4617	0.129011	0.0645057	0.896333	0.968883	0.968883	1598	0.589794	0.294897	0.633533	1	0.99152
Gm12957	-0.072209	0.611177	1947;2713;4990;5402	0.44005	0.29287	0.737345	0.991107	0.960405	813;1225;3502;4268	0.823035	0.488944	0.404517	1	0.99152
Gm13007	0.145617	0.496268	1982	0.496268	0.248134	0.71757	0.988599	0.960405	4233	0.166723	0.0833615	0.871424	1	0.99152
Gm13127	0.0102465	0.371882	2153;4334	0.344035	0.219	0.777199	0.985484	0.960405	1881;4062	0.374535	0.247933	0.763611	1	0.99152
Gm13140	-0.294055	0.875866	5388	0.0619437	0.0309718	0.946214	0.979944	0.979944	827	0.875866	0.437933	0.362632	1	0.99152
Gm13410	-0.283294	0.855853	5349	0.0650987	0.0325493	0.943674	0.97915	0.97915	866	0.855853	0.427927	0.378097	1	0.99152
Gm13427	-0.804905	1.79774	6116	0.00690377	0.00345189	0.993597	0.996606	0.996606	99	1.79774	0.898868	0.050593	0.520385	0.520385
Gm14127	0.603606	2.18059	41	2.18059	1.09029	0.0217258	0.281078	0.278169	6174	0.00280462	0.00140231	0.997378	0.999793	0.998918
Gm14176	-0.257375	1.02994	3156;5359;5895	0.512859	0.253625	0.707553	0.993815	0.960405	320;856;3059	1.30904	0.77236	0.145205	0.80963	0.809336
Gm14292	0.0971548	0.481979	1667;3269	0.557913	0.321322	0.666469	0.991619	0.960405	2946;4548	0.302198	0.1911	0.797678	1	0.99152
Gm14674	-0.00266124	0.37451	942;5316	0.589686	0.241753	0.633644	0.979752	0.960405	899;5273	0.60645	0.249692	0.615988	1	0.99152
Gm14853	-0.596666	1.43926	5989	0.0160169	0.00800847	0.985273	0.991861	0.991861	226	1.43926	0.719631	0.109574	0.74981	0.747951
Gm15753	-0.417069	1.11943	5743	0.0342324	0.0171162	0.969365	0.98725	0.98684	472	1.11943	0.559715	0.217598	0.903113	0.897879
Gm15927	0.286042	1.27029	300;1014;1618	1.75318	0.95255	0.0557126	0.441435	0.441435	4597;5201;5915	0.823098	0.338139	0.404407	1	0.99152
Gm16433	0.0443851	0.47951	393;2673;5495	0.778605	0.359671	0.443087	0.934716	0.931354	720;3542;5822	0.565883	0.25711	0.65821	1	0.99152
Gm16861	-0.0232905	0.402753	2019;4848	0.357844	0.191154	0.770948	0.982825	0.960405	1367;4196	0.464471	0.268514	0.72837	1	0.99152
Gm19209	0.200945	0.768167	292;3541	1.04786	0.512117	0.253097	0.804468	0.801977	2674;5923	0.309548	0.117069	0.793679	1	0.99152
Gm20147	0.259338	0.964623	601;1613	1.17147	0.643039	0.194691	0.741168	0.741168	4602;5614	0.415401	0.167866	0.746895	1	0.99152
Gm20517	-0.0543242	0.598546	568;1867;2852;4056;5672;5761	0.513956	0.376049	0.706661	0.995094	0.960405	454;543;2159;3363;4348;5647	1.0999	0.513078	0.226668	0.900149	0.900149
Gm2058	-0.428924	1.57719	3111;5091;5890;6171	0.880968	0.449349	0.358742	0.882728	0.880799	44;325;1124;3104	1.83148	1.26136	0.0470894	0.499872	0.499872
Gm2059	-0.883938	1.92414	6141	0.00513215	0.00256608	0.995262	0.997672	0.997308	74	1.92414	0.96207	0.0387295	0.439288	0.436473
Gm20605	-0.00291968	0.648741	1652;2519;3619;3906;4050;4616	0.774633	0.485063	0.446659	0.931572	0.931354	1599;2165;2309;2596;3696;4563	0.80998	0.556047	0.415306	1	0.99152
Gm2065	-0.069326	0.455513	4038	0.187205	0.0936025	0.858971	0.966342	0.960405	2177	0.455513	0.227756	0.731628	1	0.99152
Gm20716	-0.500142	2.71645	3997;5155;5872;6032;6062;6133	2.55076	1.30369	0.00924155	0.196205	0.196205	82;153;183;343;1060;2218	3.90554	2.32556	0.000318841	0.0155294	0.0153714
Gm20784	0.258233	0.778431	1035	0.778431	0.389215	0.443339	0.932872	0.931354	5180	0.0790415	0.0395207	0.932685	0.992626	0.99152
Gm21378	0.258233	0.778431	1035	0.778431	0.389215	0.443339	0.932872	0.931354	5180	0.0790415	0.0395207	0.932685	0.992626	0.99152
Gm2710	0.284779	0.854351	869	0.854351	0.427176	0.379192	0.888178	0.883194	5346	0.0653423	0.0326711	0.943493	0.995809	0.99152
Gm28042	0.0887333	0.634358	271;939;2500;2901;4188;5007	0.749915	0.543788	0.470488	0.938708	0.937856	1208;2027;3314;3715;5276;5944	0.510946	0.345599	0.709088	1	0.99152
Gm28043	-0.461435	1.96081	315;4544;5173;5945;6106;6207	1.62802	0.846388	0.07293	0.486984	0.481984	8;109;270;1042;1671;5900	2.84287	1.67924	0.00477778	0.121723	0.120303
Gm3160	-0.410652	1.10584	5728	0.0353682	0.0176841	0.968345	0.987426	0.98684	487	1.10584	0.552921	0.223947	0.897956	0.897879
Gm34939	-0.4901	1.25179	5867	0.0249552	0.0124776	0.977366	0.988106	0.988106	348	1.25179	0.625896	0.163697	0.823957	0.821636
Gm4204	0.103067	0.682004	1692;1962;2388;3610	0.943456	0.545563	0.315415	0.847935	0.847935	2605;3827;4253;4523	0.551779	0.380402	0.672686	1	0.99152
Gm42162	0.2438	0.736848	1139	0.736848	0.368424	0.483117	0.94456	0.943265	5076	0.0878496	0.0439248	0.925872	0.997556	0.99152
Gm45734	0.375878	1.17637	414	1.17637	0.588185	0.192603	0.740023	0.739824	5801	0.0298684	0.0149342	0.97319	0.994816	0.994079
Gm45935	-0.0281967	0.556105	916;2575;2692;3948;4466;5749	0.528604	0.375372	0.694676	0.994282	0.960405	466;1749;2267;3523;3640;5299	0.765961	0.476729	0.454937	1	0.99152
Gm46174	-0.326782	0.960226	3336;6036	0.303396	0.109547	0.797	0.97693	0.960405	179;2879	1.25218	0.640147	0.163557	0.825762	0.821636
Gm5513	-0.130392	0.558095	4496	0.140545	0.0702725	0.888529	0.964855	0.964855	1719	0.558095	0.279048	0.666278	1	0.99152
Gm5521	0.0714193	0.506757	1462;3082;3613	0.70651	0.380077	0.512686	0.944392	0.944038	2602;3133;4753	0.42238	0.285945	0.744141	1	0.99152
Gm5527	-0.410652	1.10584	5728	0.0353682	0.0176841	0.968345	0.987426	0.98684	487	1.10584	0.552921	0.223947	0.897956	0.897879
Gm5842	-0.410652	1.10584	5728	0.0353682	0.0176841	0.968345	0.987426	0.98684	487	1.10584	0.552921	0.223947	0.897956	0.897879
Gm5931	-0.242568	0.812869	3156;5895	0.301138	0.115638	0.798426	0.977954	0.960405	320;3059	1.01015	0.541912	0.274277	0.936499	0.928944
Gm6039	-0.00463799	0.355304	3473	0.252666	0.126333	0.82233	0.969927	0.960405	2742	0.355304	0.177652	0.772091	1	0.99152
Gm6206	-0.429593	1.14209	5767	0.0324213	0.0162106	0.97095	0.987044	0.98684	448	1.14209	0.571047	0.206996	0.897346	0.890663
Gm6365	-0.162766	0.613819	4703	0.120996	0.0604981	0.90186	0.970422	0.969949	1512	0.613819	0.30691	0.608351	1	0.99152
Gm6421	-0.0489209	0.587974	414;906;3901;4040;4861;6024	0.770156	0.413342	0.451054	0.931354	0.931354	191;1354;2175;2314;5309;5801	0.944554	0.504065	0.314579	0.961148	0.958011
Gm6477	-0.0646136	0.448979	4005	0.190769	0.0953844	0.856798	0.96521	0.960405	2210	0.448979	0.224489	0.734031	1	0.99152
Gm6485	0.099757	0.483639	1548;3336	0.54029	0.322429	0.683864	0.994274	0.960405	2879;4667	0.303375	0.184014	0.797004	1	0.99152
Gm6722	0.245174	0.740293	1130	0.740293	0.370146	0.47971	0.945714	0.943265	5085	0.0870803	0.0435401	0.926464	0.996249	0.99152
Gm6909	0.173186	0.551078	1747	0.551078	0.275539	0.673324	0.991132	0.960405	4468	0.143258	0.071629	0.886605	1	0.99152
Gm6992	0.0877028	0.385641	2557	0.385641	0.19282	0.759011	0.983507	0.960405	3658	0.230128	0.115064	0.834293	1	0.99152
Gm7151	-0.0593842	0.624451	84;4862;5930	1.40379	0.465782	0.11861	0.602509	0.602509	285;1353;6131	0.953671	0.468344	0.308679	0.955462	0.954793
Gm7203	0.543063	1.86909	84	1.86909	0.934546	0.0437379	0.397967	0.397967	6131	0.00583993	0.00291997	0.9946	0.998822	0.998368
Gm7259	-0.228658	0.742605	5091	0.0865682	0.0432841	0.926874	0.975781	0.975607	1124	0.742605	0.371302	0.477513	1	0.99152
Gm7390	-0.0883233	0.505906	1635;5597	0.411424	0.167419	0.748479	0.988423	0.960405	618;4580	0.746846	0.337286	0.473374	1	0.99152
Gm7488	-0.152622	1.12099	3760;4200;4633;5031;5273	1.1332	0.542939	0.211099	0.77	0.77	942;1184;1582;2015;2455	2.0166	0.933887	0.0316787	0.385735	0.385735
Gm8036	0.495893	1.64108	142	1.64108	0.820541	0.0712536	0.49165	0.481984	6073	0.00996797	0.00498398	0.990814	0.998654	0.998368
Gm8203	0.195396	0.759522	1130;1982	0.992535	0.506321	0.284488	0.820753	0.820753	4233;5085	0.36218	0.17878	0.768983	1	0.99152
Gm8319	-0.410652	1.10584	5728	0.0353682	0.0176841	0.968345	0.987426	0.98684	487	1.10584	0.552921	0.223947	0.897956	0.897879
Gm8396	-0.389425	1.06178	5676	0.0393289	0.0196644	0.965036	0.990763	0.98684	539	1.06178	0.530891	0.245843	0.916928	0.915335
Gm8524	-0.63579	1.51234	6024	0.0134863	0.00674314	0.98755	0.993549	0.993549	191	1.51234	0.756169	0.0936679	0.701873	0.701873
Gm8930	-0.347087	0.97317	5554	0.0487654	0.0243827	0.957063	0.985632	0.985632	661	0.97317	0.486585	0.29642	0.943985	0.943789
Gm9144	-0.176684	0.74329	3746;5488	0.3198	0.142571	0.788524	0.979592	0.960405	727;2469	0.8017	0.495514	0.422704	1	0.99152
Gm9214	0.381497	1.19898	393	1.19898	0.599489	0.183366	0.737024	0.734979	5822	0.028299	0.0141495	0.97451	0.994324	0.994079
Gm9531	0.055726	0.400376	1139;4517	0.523753	0.266932	0.69885	0.995952	0.960405	1698;5076	0.401021	0.19224	0.752667	1	0.99152
Gm9761	0.146763	0.863044	1544;1613;1768;3041	1.24142	0.690323	0.167354	0.708793	0.708793	3174;4447;4602;4671	0.621197	0.419398	0.600505	1	0.99152
Gse1	0.0940362	0.759784	527;2604;2621;2786;3274;3716	1.33977	0.651191	0.136043	0.658737	0.655715	2499;2941;3429;3594;3611;5688	0.778465	0.482179	0.443205	1	0.99152
Gtf2i	0.0477058	0.677711	342;519;1121;4194;4350;5892	1.18946	0.58088	0.186889	0.736876	0.736602	323;1865;2021;5094;5696;5873	0.674924	0.440072	0.544947	1	0.99152
Gtf3c2	0.266219	1.66881	201;392;620;637;2040;3689	2.87478	1.4295	0.00450242	0.140679	0.140679	2526;4175;5578;5595;5823;6014	1.80939	0.759886	0.0495012	0.51556	0.51556
Gtf3c4	0.321238	2.54941	62;105;108;202;1441;5519	4.80469	2.18112	4.83092e-05	0.00615385	0.00615385	696;4774;6013;6107;6110;6153	3.21234	1.23977	0.00185386	0.0614	0.0614
H1f0	-0.0580945	0.728582	1773;2792;3745;4370;5015;5040	0.561279	0.435809	0.662953	0.991734	0.960405	1175;1200;1845;2470;3423;4442	0.874756	0.624447	0.363607	1	0.99152
H1f1	-0.0872468	0.878395	1745;3525;4368;4749;4795;5071	0.771455	0.500315	0.44969	0.934361	0.931354	1144;1420;1466;1847;2690;4470	1.28628	0.752744	0.152425	0.81688	0.813936
H1f10	0.0394452	0.578769	1343;1642;2118;2337;3814;5598	0.93251	0.496102	0.322539	0.857342	0.85553	617;2401;3878;4097;4573;4872	0.633984	0.445862	0.587001	1	0.99152
H1f2	-0.169692	0.936445	2623;3563;3842;4093;4773;4993;5878	1.0107	0.60828	0.273967	0.814524	0.813595	337;1222;1442;2122;2373;2652;3592	1.61537	0.802535	0.0750169	0.637067	0.636761
H1f3	-0.14944	0.672829	900;1106;2212;2752;4453;4773;5384;5878	0.61824	0.463067	0.603594	0.974222	0.960405	337;831;1442;1762;3463;4003;5109;5315	0.923628	0.576858	0.328393	0.965929	0.965929
H1f4	-0.156024	0.832134	1204;2752;3072;4667;4773;5079;5840	0.764909	0.478082	0.455961	0.93334	0.932956	375;1136;1442;1548;3143;3463;5011	1.24361	0.713205	0.166717	0.829081	0.829081
H1f5	0.0243513	0.626533	1405;2201;2752;2788;3268;3927;4030	0.784869	0.522991	0.437566	0.928987	0.928987	2185;2288;2947;3427;3463;4014;4810	0.744614	0.537084	0.47542	1	0.99152
H1f6	-0.00642493	0.577836	1426;2197;3215;3583;4790;4879	0.630243	0.428974	0.590837	0.97259	0.960405	1336;1425;2632;3000;4018;4789	0.678758	0.495323	0.540993	1	0.99152
H1f7	-0.089458	0.687924	1625;1716;2495;4151;5584;5953	0.556707	0.366387	0.667696	0.989887	0.960405	262;631;2064;3720;4499;4590	0.996607	0.589678	0.282156	0.932635	0.928944
H1f8	0.0382109	0.512282	571;1538;1854;3601;4480;5478	0.736409	0.439189	0.483585	0.944358	0.943265	737;1735;2614;4361;4677;5644	0.538373	0.378199	0.685693	1	0.99152
H2-T23	-0.935896	5.35123	5846;6022;6136;6179;6200;6203	5.38598	2.84395	1.20773e-05	0.00222222	0.00222222	12;15;36;79;193;369	7.35807	4.56733	0	0	0
H2ac1	-0.0860663	0.732753	1774;2953;3211;4575;4682;5805	0.590206	0.389788	0.633047	0.979744	0.960405	410;1533;1640;3004;3262;4441	0.94454	0.628049	0.314617	0.959495	0.958011
H2ac10	-0.485951	1.49684	154;874;1367;2011;2829;3434;4248;5364;5414;5470;5625;5690;5839;5931;6125	0.98996	0.611727	0.286081	0.823913	0.823913	90;284;376;525;590;745;801;851;1967;2781;3386;4204;4848;5341;6061	2.32706	1.28162	0.0154589	0.248544	0.247712
H2ac11	-0.532047	1.64075	482;874;1531;3079;3715;4248;4975;5305;5364;5470;5579;5636;5847;5931;6017;6125	2.08547	1.01309	0.0270302	0.313021	0.309274	90;198;284;368;579;636;745;851;910;1240;1967;2500;3136;4684;5341;5733	2.50489	1.40439	0.0105882	0.197011	0.197011
H2ac12	-0.550299	2.25901	1979;3038;4248;5114;5364;5625;5679;5803;5847;6110;6125	3.08378	1.93359	0.0025314	0.0952727	0.0952727	90;105;368;412;536;590;851;1101;1967;3177;4236	3.6871	1.91305	0.000623188	0.0264615	0.0264615
H2ac13	-0.45579	1.52309	773;3085;3112;3196;4248;4530;4549;5364;5579;5625;5740;5847;6125	1.99376	1.19083	0.0331932	0.345711	0.344708	90;368;475;590;636;851;1666;1685;1967;3019;3103;3130;5442	2.39388	1.30422	0.013622	0.234979	0.233653
H2ac15	-0.432008	1.95849	217;1951;5324;5364;5493;5541;5690;5882;6091	3.34101	1.45961	0.0013587	0.0642857	0.0642857	124;333;525;674;722;851;891;4264;5998	3.44826	1.67693	0.00107126	0.0394222	0.0385652
H2ac18	-0.102334	1.53402	131;162;257;533;657;829;998;1994;2773;2785;2826;3378;4399;5398;5502	2.10917	1.31335	0.0258152	0.309783	0.307571	713;817;1816;2837;3389;3430;3442;4221;5217;5386;5558;5682;5958;6053;6084	1.26247	0.739759	0.160338	0.822043	0.821636
H2ac19	-0.102334	1.53402	131;162;257;533;657;829;998;1994;2773;2785;2826;3378;4399;5398;5502	2.10917	1.31335	0.0258152	0.309783	0.307571	713;817;1816;2837;3389;3430;3442;4221;5217;5386;5558;5682;5958;6053;6084	1.26247	0.739759	0.160338	0.822043	0.821636
H2ac20	-0.169981	1.66344	131;162;257;533;572;829;1856;1994;2773;3378;3956;5398;5502;5720	2.26883	1.42398	0.0178056	0.280819	0.267292	495;713;817;2259;2837;3442;4221;4359;5386;5643;5682;5958;6053;6084	0.866431	0.586351	0.369914	1	0.99152
H2ac21	0.0417168	1.24587	67;379;572;1879;1895;3956;6078	1.73161	1.06752	0.0585109	0.452776	0.450284	137;2259;4320;4336;5643;5836;6148	0.99356	0.647997	0.283947	0.931121	0.931121
H2ac4	-0.370742	1.12854	1143;1355;2472;3835;4211;4248;4257;5579;5625;5847;6125	1.23875	0.722978	0.168175	0.710454	0.710454	90;368;590;636;1958;1967;2004;2380;3743;4860;5072	1.76939	0.967006	0.0537114	0.535819	0.535819
H2ac6	-0.490994	1.73969	482;833;3079;3715;4248;4975;5305;5364;5558;5579;5610;5636;5847;6017;6089	3.18276	1.4891	0.00201691	0.0835	0.0835	126;198;368;579;605;636;657;851;910;1240;1967;2500;3136;5382;5733	2.66212	1.32594	0.00745411	0.156253	0.156253
H2ac7	-0.492711	1.98113	874;1669;2236;4248;5364;5414;5470;5579;5625;5690;5847;5931;6125	4.12145	1.69525	0.00021256	0.0185263	0.0184	90;284;368;525;590;636;745;801;851;1967;3979;4546;5341	3.03322	1.49578	0.00282005	0.0791525	0.0791525
H2ac8	-0.507018	2.14994	352;2451;3996;4248;5493;5541;5579;5625;5690;5847;5954;6143	3.91713	1.83991	0.000315217	0.0248571	0.0237391	72;261;368;525;590;636;674;722;1967;2219;3764;5863	3.25517	1.61269	0.00168237	0.0568571	0.0568571
H2afb1	0.21979	0.67876	1302	0.67876	0.33938	0.540954	0.955032	0.955032	4913	0.102024	0.0510122	0.915285	1	0.99152
H2afb2	0.0329056	0.659065	648;1302;1419;1878;3324;4893;4896	1.00348	0.564981	0.278058	0.817876	0.815058	1319;1322;2891;4337;4796;4913;5567	0.64038	0.448806	0.580405	1	0.99152
H2afb3	0.102436	0.727675	893;1419;1696;1946;3820;4675	1.16712	0.623664	0.196295	0.742155	0.742155	1540;2395;4269;4519;4796;5322	0.70146	0.425816	0.517698	1	0.99152
H2afj	-0.0822606	0.603418	572;1096;2138;3580;3956;4098;4314;5609	0.603877	0.468312	0.618727	0.969359	0.960405	606;1901;2117;2259;2635;4077;5119;5643	0.833594	0.517369	0.395796	1	0.99152
H2afv	-0.00289165	0.632345	1705;2248;3634;3857;4124;4718	0.71768	0.472529	0.501566	0.947086	0.944038	1497;2091;2358;2581;3967;4510	0.835168	0.542006	0.394499	1	0.99152
H2afx	-0.17113	1.15727	2171;3884;4653;5378;5418;5581	0.936154	0.561858	0.319986	0.854671	0.854671	634;797;837;1562;2331;4044	1.5552	0.991585	0.0855604	0.66834	0.662757
H2afz	0.430072	3.02858	11;144;190;207;1130;1982	4.76294	2.59238	5.55556e-05	0.00657143	0.00657143	4233;5085;6008;6025;6071;6204	3.18141	1.4056	0.00202536	0.0657647	0.0657647
H2al1a	-0.316966	0.79934	76;326;776;1253;1335;1372;1384;1562;1619;1627;1645;1981;2222;2334;2598;2606;2622;3494;3547;3588;3618;3730;3844;3869;4325;4344;4430;4508;4597;4780;4840;5294;5304;5567;6026	1.09454	0.685479	0.229132	0.779142	0.777777	189;648;911;921;1375;1435;1618;1707;1785;1871;1890;2346;2371;2485;2597;2627;2668;2721;3593;3609;3617;3881;3993;4234;4570;4588;4596;4653;4831;4843;4880;4962;5439;5889;6139	1.02242	0.682932	0.267446	0.920769	0.920769
H2al1b	-0.312138	0.797909	76;211;326;776;974;1253;1372;1384;1562;1619;1627;1981;2222;2334;2598;2622;3494;3547;3618;3730;3752;3844;3869;4062;4325;4430;4508;4597;4674;4780;5294;5304;5567;6026	0.788976	0.601499	0.43368	0.926676	0.926676	189;648;911;921;1435;1541;1618;1707;1785;1890;2153;2346;2371;2463;2485;2597;2668;2721;3593;3617;3881;3993;4234;4588;4596;4653;4831;4843;4962;5241;5439;5889;6004;6139	1.04514	0.683992	0.254736	0.925092	0.920769
H2al1c	-0.316966	0.79934	76;326;776;1253;1335;1372;1384;1562;1619;1627;1645;1981;2222;2334;2598;2606;2622;3494;3547;3588;3618;3730;3844;3869;4325;4344;4430;4508;4597;4780;4840;5294;5304;5567;6026	1.09454	0.685479	0.229132	0.779142	0.777777	189;648;911;921;1375;1435;1618;1707;1785;1871;1890;2346;2371;2485;2597;2627;2668;2721;3593;3609;3617;3881;3993;4234;4570;4588;4596;4653;4831;4843;4880;4962;5439;5889;6139	1.02242	0.682932	0.267446	0.920769	0.920769
H2al1d	-0.316966	0.79934	76;326;776;1253;1335;1372;1384;1562;1619;1627;1645;1981;2222;2334;2598;2606;2622;3494;3547;3588;3618;3730;3844;3869;4325;4344;4430;4508;4597;4780;4840;5294;5304;5567;6026	1.09454	0.685479	0.229132	0.779142	0.777777	189;648;911;921;1375;1435;1618;1707;1785;1871;1890;2346;2371;2485;2597;2627;2668;2721;3593;3609;3617;3881;3993;4234;4570;4588;4596;4653;4831;4843;4880;4962;5439;5889;6139	1.02242	0.682932	0.267446	0.920769	0.920769
H2al1e	-0.316966	0.78669	76;326;776;1253;1372;1384;1562;1619;1627;1981;2222;2334;2598;2622;3494;3547;3588;3618;3730;3752;3844;3869;4062;4325;4344;4430;4508;4597;4780;4840;5294;5304;5567;6026	1.04945	0.674694	0.252389	0.80531	0.801977	189;648;911;921;1375;1435;1618;1707;1785;1871;1890;2153;2346;2371;2463;2485;2597;2627;2668;2721;3593;3617;3881;3993;4234;4588;4596;4653;4831;4843;4962;5439;5889;6139	0.980751	0.662357	0.291722	0.936225	0.936225
H2al1f	-0.316966	0.79934	76;326;776;1253;1335;1372;1384;1562;1619;1627;1645;1981;2222;2334;2598;2606;2622;3494;3547;3588;3618;3730;3844;3869;4325;4344;4430;4508;4597;4780;4840;5294;5304;5567;6026	1.09454	0.685479	0.229132	0.779142	0.777777	189;648;911;921;1375;1435;1618;1707;1785;1871;1890;2346;2371;2485;2597;2627;2668;2721;3593;3609;3617;3881;3993;4234;4570;4588;4596;4653;4831;4843;4880;4962;5439;5889;6139	1.02242	0.682932	0.267446	0.920769	0.920769
H2al1g	-0.316966	0.79934	76;326;776;1253;1335;1372;1384;1562;1619;1627;1645;1981;2222;2334;2598;2606;2622;3494;3547;3588;3618;3730;3844;3869;4325;4344;4430;4508;4597;4780;4840;5294;5304;5567;6026	1.09454	0.685479	0.229132	0.779142	0.777777	189;648;911;921;1375;1435;1618;1707;1785;1871;1890;2346;2371;2485;2597;2627;2668;2721;3593;3609;3617;3881;3993;4234;4570;4588;4596;4653;4831;4843;4880;4962;5439;5889;6139	1.02242	0.682932	0.267446	0.920769	0.920769
H2al1h	-0.316966	0.79934	76;326;776;1253;1335;1372;1384;1562;1619;1627;1645;1981;2222;2334;2598;2606;2622;3494;3547;3588;3618;3730;3844;3869;4325;4344;4430;4508;4597;4780;4840;5294;5304;5567;6026	1.09454	0.685479	0.229132	0.779142	0.777777	189;648;911;921;1375;1435;1618;1707;1785;1871;1890;2346;2371;2485;2597;2627;2668;2721;3593;3609;3617;3881;3993;4234;4570;4588;4596;4653;4831;4843;4880;4962;5439;5889;6139	1.02242	0.682932	0.267446	0.920769	0.920769
H2al1i	-0.316966	0.79934	76;326;776;1253;1335;1372;1384;1562;1619;1627;1645;1981;2222;2334;2598;2606;2622;3494;3547;3588;3618;3730;3844;3869;4325;4344;4430;4508;4597;4780;4840;5294;5304;5567;6026	1.09454	0.685479	0.229132	0.779142	0.777777	189;648;911;921;1375;1435;1618;1707;1785;1871;1890;2346;2371;2485;2597;2627;2668;2721;3593;3609;3617;3881;3993;4234;4570;4588;4596;4653;4831;4843;4880;4962;5439;5889;6139	1.02242	0.682932	0.267446	0.920769	0.920769
H2al1j	-0.0863759	0.892561	243;326;1627;2222;2622;2704;3547;3646;3683;3751;4062;4116;4303;4325;4430	0.843363	0.604405	0.38783	0.885857	0.885857	1785;1890;1912;2099;2153;2464;2532;2569;2668;3511;3593;3993;4588;5889;5972	1.42456	0.76491	0.113347	0.759927	0.751708
H2al1k	-0.311791	1.11454	29;76;102;326;1102;1372;1384;1562;1619;1627;1981;2222;2598;2622;3494;3547;3588;3618;3730;3752;3844;3869;4062;4116;4325;4344;4430;4508;4597;4840;5294;5304;5567;6026	1.80015	0.954504	0.0502838	0.418442	0.41781	189;648;911;921;1375;1618;1707;1785;1871;1890;2099;2153;2346;2371;2463;2485;2597;2627;2668;2721;3593;3617;3993;4234;4588;4596;4653;4831;4843;5113;5889;6113;6139;6186	1.04542	0.685505	0.254598	0.926624	0.920769
H2al1m	-0.302488	0.92101	29;76;326;1102;1372;1384;1562;1619;1627;1728;1981;2021;2598;2622;3494;3547;3588;3618;3730;3752;3844;3869;4062;4116;4325;4344;4508;4597;5294;5304;5567;6026	1.28996	0.789698	0.151034	0.683366	0.679681	189;648;911;921;1618;1707;1871;1890;2099;2153;2346;2371;2463;2485;2597;2627;2668;2721;3593;3617;4194;4234;4487;4588;4596;4653;4831;4843;5113;5889;6139;6186	1.15472	0.690791	0.201751	0.89571	0.890663
H2al1n	-0.188413	1.07853	29;211;273;326;974;1102;1162;1417;1562;2229;2573;2622;3547;3730;3752;3844;3869;4062;4325;4674;4722;5304;5567	1.61809	0.924273	0.0745894	0.486299	0.481984	648;911;1493;1541;1890;2153;2346;2371;2463;2485;2668;3593;3642;3986;4653;4798;5053;5113;5241;5889;5942;6004;6186	0.996461	0.713818	0.28226	0.93112	0.928944
H2al1o	-0.275068	0.841135	29;102;942;1102;1372;1562;1582;1981;2222;2598;2751;3588;3752;4116;4280;4344;4430;4508;4536;4597;4722;4840;5304;5316;5993	1.25774	0.721433	0.161977	0.705879	0.70426	222;899;911;1375;1493;1618;1679;1707;1785;1871;1935;2099;2463;2627;3464;3617;3993;4234;4633;4653;4843;5113;5273;6113;6186	0.799112	0.592843	0.424809	1	0.99152
H2al2a	-0.197171	1.09338	29;102;942;1102;1714;2283;3350;4116;4430;5062;5316;5860	1.82188	0.936919	0.0480278	0.412093	0.409426	355;899;1153;1785;2099;2865;3932;4501;5113;5273;6113;6186	0.711079	0.522891	0.50808	1	0.99152
H2al2b	-0.103958	0.62619	442;1188;2284;2321;2486;2862;3366;3438;4284;4488;4659;5157	0.752411	0.522919	0.468058	0.93952	0.937856	1058;1556;1727;1931;2777;2849;3353;3729;3894;3931;5027;5773	0.664718	0.536977	0.555223	1	0.99152
H2al2c	-0.103958	0.62619	442;1188;2284;2321;2486;2862;3366;3438;4284;4488;4659;5157	0.752411	0.522919	0.468058	0.93952	0.937856	1058;1556;1727;1931;2777;2849;3353;3729;3894;3931;5027;5773	0.664718	0.536977	0.555223	1	0.99152
H2aw	-0.0627476	0.749116	369;975;1725;1929;2601;2924;5579;5847	1.06956	0.642159	0.241857	0.794675	0.792287	368;636;3291;3614;4286;4490;5240;5846	0.814027	0.535455	0.411926	1	0.99152
H2bc1	-0.187597	0.941178	373;1919;2627;4039;4288;4598;4679;4724;4753;5161;5170	1.42126	0.806527	0.113992	0.595489	0.59237	1045;1054;1462;1491;1536;1617;1927;2176;3588;4296;5842	1.49781	0.723216	0.0965809	0.717211	0.717211
H2bc11	-0.254634	1.11793	386;1064;1947;2627;4090;4269;4414;4586;4598;4679;4724;5170;5402;5452;5559	2.09285	0.957563	0.0266848	0.311197	0.309274	656;763;813;1045;1491;1536;1617;1629;1801;1946;2125;3588;4268;5151;5829	1.05228	0.635524	0.250824	0.923031	0.920769
H2bc12	-0.162424	0.660348	1303;1449;1572;1947;2039;2681;3911;4090;4586;4724;5135;5402	0.730048	0.566218	0.489692	0.94514	0.94349	813;1080;1491;1629;2125;2304;3534;4176;4268;4643;4766;4912	0.826828	0.544429	0.40131	1	0.99152
H2bc13	-0.343257	0.869535	121;1947;2254;2307;2627;3207;3878;3968;4090;4679;4724;5135;5170;5402;6161	1.10905	0.745314	0.222226	0.782991	0.777777	54;813;1045;1080;1491;1536;2125;2247;2337;3008;3588;3908;3961;4268;6094	1.05228	0.683109	0.250824	0.923031	0.920769
H2bc14	-0.21918	1.25533	1947;2627;2713;3177;3245;3437;3703;4090;4679;4724;4990;5135;5170;5402	1.65246	1.07522	0.0692778	0.480017	0.480017	813;1045;1080;1225;1491;1536;2125;2512;2778;2970;3038;3502;3588;4268	1.15081	0.643422	0.203132	0.892271	0.890663
H2bc15	-0.449751	1.33946	1002;1448;1449;1947;3155;3911;3995;4702;5135;5390;5536;5550;5624;5718;5814;5919;5986	1.85577	0.901975	0.0447597	0.405038	0.405038	229;296;401;497;591;665;679;825;1080;1513;2220;2304;3060;4268;4766;4767;5213	2.27144	1.14687	0.0177283	0.271833	0.271833
H2bc18	0.0497423	0.674871	422;1273;2007;2850;3136;3514;4598	1.00233	0.578534	0.2787	0.81542	0.815058	1617;2701;3079;3365;4208;4942;5793	0.63994	0.458383	0.580836	1	0.99152
H2bc21	-0.0731194	0.60477	389;2255;2290;3911;4015;4762;5660	0.555108	0.454406	0.669304	0.991385	0.960405	555;1453;2200;2304;3925;3960;5826	0.783071	0.518488	0.439273	1	0.99152
H2bc3	-0.256377	0.998277	1364;3027;3802;4201;4598;4724;5357;6118	0.946859	0.619215	0.313184	0.844678	0.84386	97;858;1491;1617;2014;2413;3188;4851	1.44467	0.855562	0.108448	0.751423	0.746523
H2bc4	-0.348664	1.15556	894;2372;2516;2627;3970;4090;4586;4598;4679;4724;5135;5170;5911;6099	1.65258	0.989814	0.0692778	0.482034	0.480017	116;304;1045;1080;1491;1536;1617;1629;2125;2245;3588;3699;3843;5321	1.15081	0.734788	0.203132	0.892271	0.890663
H2bc6	-0.349743	1.27736	1002;2254;2508;2627;3968;3970;4090;4315;4679;4702;5135;5170;5536;5550;6099	1.91606	1.09393	0.0392524	0.382365	0.38064	116;665;679;1045;1080;1513;1536;1900;2125;2245;2247;3588;3707;3961;5213	1.15134	0.73159	0.202905	0.896027	0.890663
H2bc7	-0.610017	2.04573	1449;2372;2394;2516;3911;4090;4724;5135;5390;5624;5820;5911;6001;6082;6161	1.83863	1.15155	0.0465254	0.414226	0.409426	54;133;214;304;395;591;825;1080;1491;2125;2304;3699;3821;3843;4766	2.82193	1.7502	0.00498671	0.121441	0.120394
H2bc8	-0.524177	1.68529	953;1449;2372;2516;3911;3970;4063;4090;4724;5135;5376;5850;5911;5920;5964;6099	2.10698	1.07507	0.0258792	0.308317	0.307571	116;251;295;304;365;839;1080;1491;2125;2152;2245;2304;3699;3843;4766;5262	2.8043	1.44217	0.00516184	0.120394	0.120394
H2bc9	-0.450864	1.08478	1005;1449;2372;2498;2719;2802;3878;3911;3970;4063;4090;4724;5135;5376;5512;5850;5988;6099	1.47529	0.929161	0.101528	0.562308	0.562308	116;227;365;703;839;1080;1491;2125;2152;2245;2304;2337;3413;3496;3717;3843;4766;5210	1.286	0.898176	0.152438	0.814316	0.813936
H2bfm	0.142956	0.899986	608;967;1547;2061;2312;4815	1.57085	0.771251	0.0826715	0.50148	0.50148	1400;3903;4154;4668;5248;5607	0.946139	0.460846	0.313603	0.963499	0.958011
H2bu1-ps	-0.0678952	0.828114	15;873;925;2645;2722;4045;4196;4227;4359;4364	1.62673	0.710095	0.0730447	0.483848	0.481984	1851;1856;1988;2019;2170;3493;3570;5290;5342;6200	0.908239	0.599852	0.339091	0.974885	0.974885
H2bu2	-0.0821909	1.01179	15;389;873;2247;2645;4196;4359;6104	1.72154	0.867269	0.059593	0.450621	0.450621	111;1856;2019;3570;3968;5342;5826;6200	0.899753	0.543258	0.345163	0.980429	0.980429
H2c8	-0.136325	0.673028	396;1110;1148;1888;2687;3160;4834;5684;5887	0.808245	0.57705	0.41683	0.913056	0.912725	328;531;1381;3055;3528;4327;5067;5105;5819	0.851806	0.544765	0.381138	1	0.99152
H3c1	-0.352779	1.72223	2562;4300;5046;5070;5337;5517;5896;5951	2.15273	1.21944	0.0232947	0.285748	0.285748	264;319;698;878;1145;1169;1915;3653	3.0872	1.47504	0.00252174	0.0732632	0.0732632
H3c10	-0.0591968	0.757689	1974;3098;3953;4161;4300;5361	0.627584	0.45473	0.593717	0.975393	0.960405	854;1915;2054;2262;3117;4241	1.02245	0.649377	0.267443	0.934359	0.920769
H3c11	-0.155936	0.624458	509;886;1382;1913;1974;2781;3185;3766;3872;3953;4161;4300;5328;5602	0.682705	0.508955	0.536983	0.958237	0.955032	613;887;1915;2054;2262;2343;2449;3030;3434;4241;4302;4833;5329;5706	0.732548	0.53557	0.487242	1	0.99152
H3c13	-0.288434	2.00646	13;55;63;195;948;1511;1650;2585;2775;3138;3214;3476;5284;5804;5885;5925	3.29144	1.71502	0.00155556	0.0696216	0.0688947	290;330;411;931;2739;3001;3077;3440;3630;4565;4704;5267;6020;6152;6160;6202	1.17674	0.724809	0.192429	0.873047	0.873047
H3c14	-0.325558	1.30324	13;55;195;948;1650;2585;2775;3138;3161;3214;3476;4921;5284;5804;5885;5925	2.08089	1.11597	0.0272669	0.309274	0.309274	290;330;411;931;1294;2739;3001;3054;3077;3440;3630;4565;5267;6020;6160;6202	1.17674	0.705492	0.192429	0.873047	0.873047
H3c15	-0.325558	1.30324	13;55;195;948;1650;2585;2775;3138;3161;3214;3476;4921;5284;5804;5885;5925	2.08089	1.11597	0.0272669	0.309274	0.309274	290;330;411;931;1294;2739;3001;3054;3077;3440;3630;4565;5267;6020;6160;6202	1.17674	0.705492	0.192429	0.873047	0.873047
H3c2	-0.159428	0.790984	50;3030;3249;3700;4329;5070;5337;5517	1.21587	0.658542	0.176748	0.728095	0.725069	698;878;1145;1886;2515;2966;3185;6165	1.04355	0.677984	0.255495	0.925821	0.920769
H3c3	-0.283578	1.06193	1649;1913;3030;3037;3766;4329;5046;5070;5328;5337;5517;5602	1.20695	0.852016	0.179999	0.728797	0.728797	613;698;878;887;1145;1169;1886;2449;3178;3185;4302;4566	1.93073	0.909818	0.0381486	0.435683	0.435683
H3c4	-0.122437	0.673906	896;2275;2391;3872;4516;5127;5940	0.549029	0.420888	0.675344	0.991463	0.960405	275;1088;1699;2343;3824;3940;5319	0.778733	0.577734	0.44296	1	0.99152
H3c6	-0.397723	1.8234	4510;4516;4620;5259;5268;5862;5940;6048	3.16942	1.56173	0.00207971	0.084	0.084	167;275;353;947;956;1595;1699;1705	2.53403	1.54904	0.010058	0.193674	0.192506
H3c7	-0.284235	1.32389	1602;3030;3193;3374;4329;4620;5070;5078;5337;5440;5516;5517	1.7083	1.13393	0.061465	0.456439	0.456439	698;699;775;878;1137;1145;1595;1886;2841;3022;3185;4613	1.97242	0.933821	0.0348732	0.4125	0.4125
H3c8	-0.111175	0.731364	130;433;1974;3017;3590;3797;3953;4161;4242;4300;5361	0.855719	0.627125	0.378107	0.88815	0.883194	854;1915;1973;2054;2262;2418;2625;3198;4241;5782;6085	0.865073	0.569686	0.370878	1	0.99152
H3f3a	-0.179296	0.773813	414;906;3216;3901;4040;4621;4861;6024	0.692676	0.507722	0.526723	0.955371	0.951723	191;1354;1594;2175;2314;2999;5309;5801	1.02359	0.663332	0.266551	0.935186	0.920769
H3f3a-ps2	0.0925245	0.559262	414;4861	0.905284	0.372858	0.341198	0.873298	0.868577	1354;5801	0.467458	0.175731	0.72731	1	0.99152
H3f3b	-0.0488418	0.602281	1548;1778;2760;3336;4029;6036	0.616638	0.390116	0.605357	0.971388	0.960405	179;2186;2879;3455;4437;4667	0.825837	0.516326	0.402267	1	0.99152
H3f3c	-0.0565428	0.99716	139;263;414;3261;4861;5503;6024	2.10482	0.854439	0.0260024	0.307571	0.307571	191;712;1354;2954;5801;5952;6076	1.18197	0.69328	0.190188	0.877304	0.873047
H4c1	-0.229661	0.771253	836;2063;2069;2381;3489;4156;4356;5350;5684;5887	0.70628	0.516805	0.513064	0.944038	0.944038	328;531;865;1859;2059;2726;3834;4146;4152;5379	0.945575	0.661196	0.313973	0.962852	0.958011
H4c11	-0.13895	0.618287	544;699;1110;1862;2515;3057;3307;3922;4103;5194;5887	0.710346	0.530262	0.508844	0.945731	0.944038	328;1021;2112;2293;2908;3158;3700;4353;5105;5516;5671	0.640202	0.502158	0.580693	1	0.99152
H4c12	-0.373967	1.08607	544;699;2515;3057;3307;4103;4254;5128;5230;5684;5887;6095	0.929245	0.639512	0.32469	0.857553	0.857553	120;328;531;985;1087;1961;2112;2908;3158;3700;5516;5671	1.47154	0.930674	0.102157	0.73553	0.73553
H4c14	-0.0853535	0.844613	3;1483;3171;3534;4995;5147;5289	2.47241	0.724178	0.0112379	0.216395	0.216395	926;1068;1220;2681;3044;4732;6212	0.956657	0.561003	0.306843	0.956934	0.954793
H4c2	-0.237744	1.04233	2098;3922;4016;4156;4547;5194;5684;5887	1.55151	0.779551	0.0861111	0.51295	0.51295	328;531;1021;1668;2059;2199;2293;4117	1.63909	0.893212	0.0714457	0.62933	0.619109
H4c3	-0.138486	0.782013	1226;1243;3697;3891;3992;4106;4356;5887	0.890818	0.527788	0.351627	0.878271	0.875487	328;1859;2109;2223;2324;2518;4972;4989	1.35801	0.670304	0.13078	0.781848	0.77775
H4c4	-0.194931	1.07323	3;458;2762;4754;4846;4915;5350;5684	2.41463	0.920003	0.0125809	0.231489	0.231489	531;865;1300;1369;1461;3453;5757;6212	1.74463	0.805839	0.0566643	0.548749	0.544231
H4c6	-0.295242	1.04054	836;1654;2566;2635;3972;4356;5207;5684;5811;5887	0.784088	0.541525	0.438245	0.929237	0.929237	328;404;531;1008;1859;2243;3580;3649;4561;5379	1.3972	0.891644	0.120012	0.761456	0.751708
H4c9	-0.229595	1.32708	16;54;546;1690;2399;2413;3472;4998;5887;6137	2.49907	1.13649	0.0106703	0.215488	0.215488	78;328;1217;2743;3802;3816;4525;5669;6161;6199	1.09019	0.669601	0.231257	0.905348	0.904349
H4f16	-0.0149708	0.588107	1861;2085;2174;2944;4733;5683	0.67929	0.425299	0.54042	0.956128	0.955032	532;1482;3271;4041;4130;4354	0.926897	0.504156	0.326326	0.966719	0.965382
Haspin	0.0246026	0.487681	730;1274;2343;3647;4805;5379	0.59889	0.418118	0.624042	0.971254	0.960405	836;1410;2568;3872;4941;5485	0.559286	0.391082	0.665116	1	0.99152
Hat1	-0.397112	2.2769	4560;5226;5490;5555;5837;6131	2.23043	1.09113	0.0196848	0.281017	0.2764	84;378;660;725;989;1655	3.44744	1.95017	0.00107126	0.0385652	0.0385652
Hcfc1	0.230972	1.40522	72;193;305;2883;3048;4407	2.69176	1.20368	0.00701691	0.181562	0.178848	1808;3167;3332;5910;6022;6143	1.53204	0.575152	0.0900145	0.686931	0.686931
Hcfc2	-0.225659	1.3479	2364;4662;4874;5058;5507;5962	1.48342	0.622434	0.0996836	0.557689	0.557689	253;708;1157;1341;1553;3851	2.35774	1.15485	0.0145447	0.24086	0.24086
Hdac1	0.17794	1.16928	597;659;902;923;2568;5090	2.27625	1.00178	0.0174964	0.284059	0.267292	1125;3647;5292;5313;5556;5618	1.39415	0.584367	0.121	0.759	0.751708
Hdac10	0.0540623	0.642976	1128;2165;3086;3192;3889;3925	1.19719	0.551125	0.183978	0.737695	0.734979	2290;2326;3023;3129;4050;5087	0.653596	0.486674	0.566775	1	0.99152
Hdac11	0.0729476	0.660124	1411;1512;2361;2488;3816;4459	0.864803	0.565805	0.371161	0.881839	0.880799	1756;2399;3727;3854;4703;4804	0.67061	0.450608	0.549242	1	0.99152
Hdac2	0.0855855	0.742655	1431;1834;2303;2839;3479;3648	1.3879	0.6365	0.122409	0.614273	0.612554	2567;2736;3376;3912;4381;4784	0.762972	0.500767	0.457797	1	0.99152
Hdac3	-0.00346912	0.948664	231;430;469;2159;5637;6159	2.16781	0.812848	0.022657	0.284242	0.284242	56;578;4056;5746;5785;5984	1.28669	0.688343	0.152306	0.81889	0.813936
Hdac4	-0.0663162	0.758785	2574;2799;3456;3893;4528;5591	0.765961	0.440978	0.454937	0.93471	0.932956	624;1687;2322;2759;3416;3641	1.3929	0.650338	0.121301	0.758015	0.751708
Hdac5	0.0138405	0.541973	1291;2022;2650;3147;3370;5677	0.889997	0.453024	0.352105	0.876821	0.875487	538;2845;3068;3565;4193;4924	0.606319	0.464621	0.616091	1	0.99152
Hdac6	-0.0136535	0.562842	782;2709;3273;4010;4501;5287	0.539766	0.407227	0.684382	0.993283	0.960405	928;1714;2205;2942;3506;5433	0.825368	0.482474	0.4026	1	0.99152
Hdac7	0.0267246	0.514895	964;1363;3256;3572;4287;5036	0.571819	0.44142	0.652229	0.99091	0.960405	1179;1928;2643;2959;4852;5251	0.674454	0.421763	0.545313	1	0.99152
Hdac8	0.0200091	0.524906	1394;1702;2442;3081;4881;4928	0.637449	0.449988	0.583551	0.969268	0.960405	1287;1334;3134;3773;4513;4821	0.661405	0.44824	0.558769	1	0.99152
Hdac9	0.144874	0.987201	1212;1268;1726;2119;2204;3620	1.66287	0.845944	0.0676739	0.480979	0.480017	2595;4011;4096;4489;4947;5003	1.00557	0.557043	0.27678	0.937317	0.928944
Hdgf	-0.0307541	0.556137	1232;1457;2959;3409;5219;5726	0.557762	0.375377	0.66662	0.990953	0.960405	489;996;2806;3256;4758;4983	0.717601	0.476772	0.501737	1	0.99152
Hdgfl2	-0.062923	0.650432	126;1446;2665;5026;5619;5976	0.959332	0.461745	0.305321	0.841285	0.838811	239;596;1189;3550;4769;6089	1.13024	0.557532	0.212698	0.898541	0.896223
Hells	0.0949847	0.726365	847;2036;2357;2509;3412;3969	1.16814	0.622553	0.195915	0.744119	0.742155	2246;2803;3706;3858;4179;5368	0.637808	0.456216	0.583196	1	0.99152
Hif1an	-0.0198382	0.634074	1817;2360;3335;3688;4796;4875	0.63238	0.440611	0.588622	0.970875	0.960405	1340;1419;2527;2880;3855;4398	0.900696	0.543497	0.344481	0.981859	0.980429
Hinfp	0.136096	1.20966	9;383;1023;1056;4791;6068	2.06452	1.03656	0.0281051	0.312362	0.312362	147;1424;5159;5192;5832;6206	1.25174	0.569369	0.163732	0.821636	0.821636
Hira	0.174093	0.995426	181;1164;1790;2054;2322;4091	1.56259	0.853054	0.084372	0.509927	0.509658	2124;3893;4161;4425;5051;6034	0.940867	0.453297	0.317168	0.960201	0.958011
Hirip3	0.0215672	0.510494	311;1127;3317;3508;4419;5703	0.654441	0.437679	0.565851	0.966031	0.960405	512;1796;2707;2898;5088;5904	0.694514	0.391412	0.524882	1	0.99152
Hist1h2al	-0.0246219	1.83479	131;162;257;533;657;829;998;1994;2773;3378;5398;5502	2.65634	1.57064	0.00753744	0.183559	0.183559	713;817;2837;3442;4221;5217;5386;5558;5682;5958;6053;6084	2.25809	0.979056	0.018192	0.276385	0.276385
Hist1h2an	-0.48867	1.53204	612;874;1531;3097;3951;4248;5364;5393;5470;5579;5625;5626;5847;5931;6125	1.89263	0.956227	0.0413865	0.385034	0.385034	90;284;368;589;590;636;745;822;851;1967;2264;3118;4684;5341;5603	2.66212	1.31165	0.00745411	0.156253	0.156253
Hist1h2ao	-0.519473	1.33104	482;773;956;2410;2662;2766;3079;3715;4248;4610;4975;5305;5364;5579;5636;5690;5740;5847;6017;6125	1.37021	0.775267	0.127132	0.626577	0.626577	90;198;368;475;525;579;636;851;910;1240;1605;1967;2500;3136;3449;3553;3805;5259;5442;5733	2.19045	1.13968	0.0212838	0.303845	0.303845
Hist1h2ap	-0.519473	1.33104	482;773;956;2410;2662;2766;3079;3715;4248;4610;4975;5305;5364;5579;5636;5690;5740;5847;6017;6125	1.37021	0.775267	0.127132	0.626577	0.626577	90;198;368;475;525;579;636;851;910;1240;1605;1967;2500;3136;3449;3553;3805;5259;5442;5733	2.19045	1.13968	0.0212838	0.303845	0.303845
Hist1h2bp	-0.196752	0.688414	785;1283;1542;1830;1831;2627;2702;4090;4679;4724;5135;5170;5402	0.756634	0.53407	0.463885	0.939112	0.937856	813;1045;1080;1491;1536;2125;3513;3588;4384;4385;4673;4932;5430	0.91181	0.590293	0.336582	0.974441	0.97355
Hist1h2bq	-0.286523	1.78318	1947;2627;4090;4586;4598;4679;4724;5135;5170;5402;5624;5718	2.48688	1.5268	0.010965	0.216167	0.216167	497;591;813;1045;1080;1491;1536;1617;1629;2125;3588;4268	1.48142	0.845968	0.1004	0.732432	0.732432
Hist1h2br	-0.286523	1.78318	1947;2627;4090;4586;4598;4679;4724;5135;5170;5402;5624;5718	2.48688	1.5268	0.010965	0.216167	0.216167	497;591;813;1045;1080;1491;1536;1617;1629;2125;3588;4268	1.48142	0.845968	0.1004	0.732432	0.732432
Hist1h4m	-0.512515	1.59324	16;54;1110;2089;3472;4254;4550;4775;4897;4954;5128;5230;5301;5350;5684;5887;6095;6137	2.73215	1.36382	0.00605072	0.169831	0.169831	78;120;328;531;865;914;985;1087;1261;1318;1440;1665;1961;2743;4126;5105;6161;6199	1.55502	1.0676	0.0855616	0.665211	0.662757
Hist1h4n	-0.512515	1.50241	16;54;1110;2089;3472;4254;4775;4954;4998;5128;5230;5301;5350;5684;5887;6095;6137	2.40713	1.28625	0.0132645	0.238761	0.238761	78;120;328;531;865;914;985;1087;1217;1261;1440;1961;2743;4126;5105;6161;6199	1.66202	1.12064	0.0677476	0.609728	0.609728
Hjurp	-0.0294608	0.553979	766;803;3288;3589;5221;5901	0.841595	0.40355	0.389237	0.886624	0.886624	314;994;2626;2927;5412;5449	0.718681	0.474944	0.500664	1	0.99152
Hlcs	0.167461	0.981341	405;1092;1187;2467;3015;3386	1.58211	0.84097	0.0806534	0.500232	0.497007	2829;3200;3748;5028;5123;5810	0.88265	0.471988	0.357478	0.996606	0.99152
Hltf	0.121826	0.732989	206;959;2175;2983;3605;4555	0.809297	0.628284	0.416051	0.912556	0.912556	1660;2610;3232;4040;5256;6009	0.523716	0.352846	0.698885	1	0.99152
Hmg20a	0.144576	0.882186	312;1717;1905;2074;3278;3602	1.42097	0.756051	0.11411	0.59237	0.59237	2613;2937;4141;4310;4498;5903	0.782821	0.44721	0.439417	1	0.99152
Hmg20b	0.05744	0.658358	750;1252;1332;2070;5280;5288	1.08542	0.564301	0.233671	0.781737	0.779928	927;935;4145;4883;4963;5465	0.752306	0.447488	0.468249	1	0.99152
Hmgb1	0.034058	0.577228	869;2173;2359;2849;3034;5728	1.06957	0.494785	0.241857	0.796254	0.792287	487;3181;3366;3856;4042;5346	0.651519	0.452779	0.568964	1	0.99152
Hmgb1-ps2	-0.410652	1.10584	5728	0.0353682	0.0176841	0.968345	0.987426	0.98684	487	1.10584	0.552921	0.223947	0.897956	0.897879
Hmgb1-ps3	-0.410652	1.10584	5728	0.0353682	0.0176841	0.968345	0.987426	0.98684	487	1.10584	0.552921	0.223947	0.897956	0.897879
Hmgb1-ps4	-0.410652	1.10584	5728	0.0353682	0.0176841	0.968345	0.987426	0.98684	487	1.10584	0.552921	0.223947	0.897956	0.897879
Hmgb1-ps7	-0.410652	1.10584	5728	0.0353682	0.0176841	0.968345	0.987426	0.98684	487	1.10584	0.552921	0.223947	0.897956	0.897879
Hmgb3	0.036891	0.311356	3034	0.311356	0.155678	0.792779	0.979002	0.960405	3181	0.290808	0.145404	0.803318	1	0.99152
Hmgn1	0.109675	0.736081	692;1606;1622;2912;3419;4126	1.06705	0.630884	0.243045	0.792287	0.792287	2089;2796;3303;4593;4609;5523	0.585018	0.419038	0.638501	1	0.99152
Hmgn2	0.10979	0.715625	287;1304;1528;2475;4451;4585	0.894421	0.613392	0.34906	0.875824	0.874953	1630;1764;3740;4687;4911;5928	0.560384	0.369812	0.663936	1	0.99152
Hmgn3	0.280628	1.94907	295;486;536;573;823;4038	3.67341	1.6692	0.000637681	0.0406154	0.0395714	2177;5392;5642;5679;5729;5920	2.46115	0.964337	0.0114855	0.206739	0.206739
Hmgn5	-0.0618973	0.683871	1959;2218;3520;3530;5272;5569	0.545544	0.396974	0.678749	0.990315	0.960405	646;943;2685;2695;3997;4256	0.986218	0.586174	0.288348	0.932625	0.932175
Hp1bp3	0.178203	1.01788	268;615;1210;2874;3201;3341	1.61697	0.872281	0.0748007	0.481984	0.481984	2874;3014;3341;5005;5600;5947	0.904857	0.45882	0.341639	0.977123	0.977123
Hr	0.00299395	0.53857	849;2588;3049;3658;3856;5482	0.678847	0.421843	0.540886	0.955932	0.955032	733;2359;2557;3166;3627;5366	0.771542	0.461688	0.449543	1	0.99152
Huwe1	-0.238323	1.20806	1956;3484;4652;5431;5571;6094	0.875235	0.503907	0.363112	0.881692	0.880799	121;644;784;1563;2731;4259	1.57185	1.03515	0.0825471	0.676723	0.662757
Ikzf1	0.143548	0.931677	944;1123;1998;2121;2669;3498	1.49731	0.798406	0.0966353	0.548041	0.545442	2717;3546;4094;4217;5092;5271	0.829508	0.509007	0.399192	1	0.99152
Ikzf3	0.175842	1.1025	775;851;1062;1238;2567;4310	1.81949	0.944656	0.0482114	0.409426	0.409426	1905;3648;4977;5153;5364;5440	1.09119	0.5544	0.230831	0.907971	0.904349
Il4i1	0.0895104	0.644788	279;1620;2232;2875;3345;5197	0.902365	0.552707	0.343483	0.869737	0.868577	1018;2870;3340;3983;4595;5936	0.571307	0.363821	0.652745	1	0.99152
Il4i1b	0.0895104	0.644788	279;1620;2232;2875;3345;5197	0.902365	0.552707	0.343483	0.869737	0.868577	1018;2870;3340;3983;4595;5936	0.571307	0.363821	0.652745	1	0.99152
Ing1	-0.0224624	0.528238	514;1755;3130;4143;5209;5582	0.505221	0.379105	0.714225	0.9881	0.960405	633;1006;2072;3085;4460;5701	0.712256	0.452852	0.506902	1	0.99152
Ing2	0.155664	0.966934	579;1557;1586;1868;2846;3441	1.54012	0.82861	0.0883478	0.516975	0.514204	2774;3369;4347;4629;4658;5636	0.856178	0.503683	0.377722	1	0.99152
Ing3	0.0939866	0.67329	233;1945;2520;2837;3420;4768	0.865719	0.577131	0.370378	0.883784	0.880799	1447;2795;3378;3695;4270;5982	0.555776	0.378981	0.668678	1	0.99152
Ing4	-0.0569502	0.71442	2208;2378;3101;4512;5028;5202	0.624522	0.427834	0.597034	0.976964	0.960405	1013;1187;1703;3114;3837;4007	1.14331	0.612329	0.206476	0.8998	0.890663
Ing5	0.148682	0.853269	267;1217;1772;2295;3221;4036	1.12452	0.731294	0.21519	0.774683	0.774683	2179;2994;3920;4443;4998;5948	0.614601	0.40379	0.607513	1	0.99152
Ino80	-0.41962	2.40313	2971;5535;5774;5861;5984;6065	2.77042	1.16923	0.00558937	0.165286	0.165286	150;231;354;441;680;3244	4.07649	2.05768	0.000227053	0.0139259	0.0135484
Ino80b	-0.23718	1.07925	1804;1826;2818;5628;5724;6176	1.04692	0.439782	0.253547	0.804356	0.801977	39;491;587;3397;4389;4411	1.90245	0.924847	0.0406329	0.448587	0.446
Ino80c	0.0597733	0.554751	522;1709;1944;3089;4187;5260	0.701825	0.475566	0.517378	0.945671	0.945671	955;2028;3126;4271;4506;5693	0.505199	0.368492	0.714273	1	0.99152
Ino80d	-0.0503843	0.628731	1474;2128;2427;4427;5314;5526	0.569102	0.384104	0.654983	0.992362	0.960405	689;901;1788;3788;4087;4741	0.773327	0.538942	0.447966	1	0.99152
Ino80e	-0.148695	0.959097	2252;3227;4004;4961;5434;5800	0.665597	0.446296	0.554522	0.960552	0.958949	415;781;1254;2211;2988;3963	1.17208	0.821914	0.194175	0.878563	0.878304
Ints12	0.296759	1.84323	138;297;525;1115;2010;2186	2.72233	1.57897	0.00616304	0.1701	0.1701	4029;4205;5100;5690;5918;6077	1.67962	0.833309	0.0656014	0.596901	0.596901
Jade1	0.140928	0.88885	372;1072;1264;1451;3337;5098	1.58171	0.761711	0.0806957	0.498627	0.497007	1117;2878;4764;4951;5143;5843	0.941178	0.438693	0.316969	0.961355	0.958011
Jade2	0.0568576	0.616327	921;1300;1729;2199;5033;5111	1.00786	0.528298	0.275611	0.815021	0.815021	1104;1182;4016;4486;4915;5294	0.631939	0.425809	0.58911	1	0.99152
Jade3	-0.0163857	0.612729	185;401;3067;3976;4391;6114	1.32025	0.525238	0.141612	0.664334	0.664153	101;1824;2239;3148;5814;6030	1.04648	0.486365	0.254053	0.926678	0.920769
Jak2	-0.386388	2.56882	5238;5435;5520;5680;5824;5966	3.31566	1.33646	0.00149275	0.0686667	0.0686667	249;391;535;695;780;977	4.82086	2.19974	4.83092e-05	0.00421053	0.00421053
Jarid2	0.23749	1.40902	189;453;1477;1784;1992;2527	2.3446	1.20725	0.0149626	0.260821	0.260742	3688;4223;4431;4738;5762;6026	1.40312	0.636239	0.118758	0.762264	0.751708
Jdp2	0.110616	0.725204	406;1757;1873;3014;3360;4204	1.01825	0.621585	0.269725	0.818066	0.813595	2011;2855;3201;4342;4458;5809	0.568084	0.39879	0.656018	1	0.99152
Jmjd1c	0.0232024	0.728556	36;454;3291;3711;5664;5806	1.47153	0.624559	0.102448	0.565513	0.565513	409;551;2504;2924;5761;6179	1.08965	0.4886	0.231548	0.904349	0.904349
Jmjd4	0.200358	1.19038	487;640;1045;1403;3103;3206	1.72445	1.01997	0.0592766	0.450284	0.450284	3009;3112;4812;5170;5575;5728	0.974514	0.561188	0.295669	0.943407	0.943407
Jmjd6	0.3082	1.72436	14;488;717;737;2162;3800	2.63718	1.47728	0.00781401	0.184857	0.183778	2415;4053;5478;5498;5727;6201	1.6427	0.685333	0.0710386	0.629091	0.619109
Jmjd7	0.0887333	0.634358	271;939;2500;2901;4188;5007	0.749915	0.543788	0.470488	0.938708	0.937856	1208;2027;3314;3715;5276;5944	0.510946	0.345599	0.709088	1	0.99152
Jmjd8	0.139438	0.824879	99;811;1849;2409;3121;5321	1.05446	0.707003	0.249842	0.801818	0.801509	894;3094;3806;4366;5404;6116	0.626477	0.363188	0.594994	1	0.99152
Kansl1	0.227698	1.41567	495;808;895;1180;1805;3142	2.05535	1.21286	0.029029	0.318358	0.316553	3073;4410;5035;5320;5407;5720	1.27031	0.68889	0.157746	0.824063	0.821636
Kansl2	0.127204	0.781537	124;1822;2221;2355;3902;4184	1.03068	0.669881	0.262845	0.812075	0.80898	2031;2313;3860;3994;4393;6091	0.584016	0.383983	0.639563	1	0.99152
Kansl3	0.228869	1.26825	101;299;1079;1791;2466;4140	1.54497	1.08669	0.0875664	0.51605	0.514204	2075;3749;4424;5136;5916;6114	0.869038	0.511315	0.368014	1	0.99152
Kat14	-0.160127	0.949335	2194;3093;4221;4871;5043;6000	0.68443	0.428464	0.535273	0.956216	0.955032	215;1172;1344;1994;3122;4021	1.13461	0.813576	0.2105	0.893815	0.893815
Kat2a	-0.042991	0.613906	1286;1740;2206;2807;5603;5835	0.726422	0.410524	0.493264	0.945424	0.943924	380;612;3408;4009;4475;4929	1.01726	0.52626	0.270223	0.928402	0.928402
Kat2b	0.0557349	0.601979	1163;1185;2948;3331;4238;4318	0.948532	0.516016	0.312091	0.843103	0.843103	1897;1977;2884;3267;5030;5052	0.588779	0.43614	0.634593	1	0.99152
Kat5	-0.0827814	0.650563	915;2737;2897;2906;4665;6111	0.691823	0.376959	0.527586	0.951723	0.951723	104;1550;3309;3318;3478;5300	1.03484	0.557695	0.260483	0.925665	0.920769
Kat6a	0.231802	1.35212	159;930;1021;1464;2514;2653	2.2178	1.15853	0.0201256	0.280067	0.2764	3562;3701;4751;5194;5285;6056	1.31251	0.609033	0.143975	0.813727	0.809336
Kat6b	0.00922313	0.553513	1598;1841;2965;3462;4538;4910	0.613739	0.441529	0.608436	0.970684	0.960405	1305;1677;2753;3250;4374;4617	0.774068	0.474493	0.447292	1	0.99152
Kat7	-0.076186	0.75287	510;1479;4709;5045;5237;5615	0.907802	0.463184	0.339455	0.870183	0.868577	600;978;1170;1506;4736;5705	1.52716	0.64522	0.0908225	0.689917	0.689917
Kat8	0.261489	1.57928	140;550;639;1007;1626;3841	2.26485	1.35296	0.0179275	0.277458	0.267292	2374;4589;5208;5576;5665;6075	1.41729	0.704039	0.114848	0.757721	0.751708
Kdm1a	-0.451608	2.76861	5044;5527;5640;5869;5979;6061	2.93837	1.40649	0.00399638	0.129765	0.128077	154;236;346;575;688;1171	4.34889	2.37064	0.000124396	0.00858333	0.0084
Kdm1b	0.309478	1.80639	18;623;654;1289;1988;2237	2.66223	1.54761	0.00745411	0.184239	0.183559	3978;4227;4926;5561;5592;6197	1.63505	0.751084	0.0719336	0.623675	0.619109
Kdm2a	-0.0996923	0.976374	3277;3464;3965;4027;5101;5205	1.12708	0.546678	0.213938	0.773541	0.773541	1010;1114;2188;2250;2751;2938	1.95192	0.836688	0.0362512	0.425759	0.424125
Kdm2b	0.226896	1.36599	434;476;661;1136;2777;3469	1.95124	1.1703	0.0362947	0.359904	0.359904	2746;3438;5079;5554;5739;5781	1.17688	0.631963	0.192385	0.880083	0.873047
Kdm3a	-0.0358593	0.615871	1851;2249;3024;3736;4476;5646	0.515744	0.393239	0.705339	0.996623	0.960405	569;1739;2479;3191;3966;4364	0.920919	0.527928	0.330205	0.967823	0.967823
Kdm3b	-0.150244	0.982707	1796;3734;4346;4752;5454;5789	0.861981	0.46335	0.373203	0.884155	0.883194	426;761;1463;1869;2481;4419	1.43688	0.842121	0.110407	0.74932	0.74932
Kdm4a	0.229667	1.40297	381;408;1439;1736;2154;2330	2.55609	1.20204	0.00916787	0.199763	0.196205	3885;4061;4479;4776;5807;5834	1.55684	0.664114	0.0852693	0.67241	0.662757
Kdm4b	0.111466	0.82149	407;1034;1326;1380;4823;4983	1.65601	0.704018	0.0688961	0.483441	0.480017	1232;1392;4835;4889;5181;5808	0.987315	0.444359	0.287717	0.934235	0.932175
Kdm4c	0.0800845	0.637601	363;812;2576;2789;3493;5545	0.834806	0.546542	0.394778	0.893104	0.893104	670;2722;3426;3639;5403;5852	0.542063	0.368977	0.682124	1	0.99152
Kdm4d	0.165264	0.959979	339;413;1134;2765;3831;3853	1.29822	0.82266	0.148366	0.680593	0.679681	2362;2384;3450;5081;5802;5876	0.680365	0.435018	0.539268	1	0.99152
Kdm4dl	0.2447	0.738758	1134	0.738758	0.369379	0.481163	0.945203	0.943265	5081	0.0874221	0.043711	0.926179	0.997238	0.99152
Kdm5a	-0.162852	1.03342	1816;3338;4748;5083;5412;5801	0.931263	0.483287	0.323278	0.856557	0.85553	414;803;1132;1467;2877;4399	1.56558	0.885541	0.0835688	0.678382	0.662757
Kdm5b	-0.0636896	0.787533	2747;2769;3606;4064;4532;5365	0.843448	0.467776	0.387816	0.88705	0.885857	850;1683;2151;2609;3446;3468	1.51975	0.674951	0.0923587	0.695209	0.695209
Kdm5c	-0.103474	0.719045	689;1656;3568;4573;5783;5922	0.536833	0.378947	0.687124	0.99378	0.960405	293;432;1642;2647;4559;5526	1.26486	0.616294	0.15964	0.828727	0.821636
Kdm5d	0.0234152	0.512663	397;1732;2112;2814;4467;5853	0.723882	0.439516	0.495727	0.945765	0.944038	362;1748;3401;4103;4483;5818	0.586846	0.39191	0.636645	1	0.99152
Kdm6a	-0.204233	1.45846	3692;4539;4727;5256;5453;5485	1.40609	0.740031	0.117954	0.601022	0.601022	730;762;959;1488;1676;2523	2.34872	1.24951	0.0147657	0.242099	0.242099
Kdm6b	0.00630544	0.553449	1122;2641;2987;3143;4523;5076	0.620199	0.436757	0.60147	0.977462	0.960405	1139;1692;3072;3228;3574;5093	0.7947	0.47443	0.428808	1	0.99152
Kdm7a	-0.0353244	0.575524	1570;1904;2779;3686;4690;5771	0.519752	0.372381	0.702123	0.998039	0.960405	444;1525;2529;3436;4311;4645	0.758313	0.493378	0.462335	1	0.99152
Kdm8	0.240983	1.42122	241;332;865;1390;1957;3720	1.89502	1.21763	0.0412162	0.387807	0.385034	2495;4258;4825;5350;5883;5974	1.16025	0.626901	0.199486	0.890426	0.890426
Keap1	-0.863824	5.0872	5514;6097;6156;6167;6182;6183	5.74116	2.73875	4.83092e-06	0.00133333	0.00133333	32;33;48;59;118;701	7.83762	4.3422	0	0	0
Kmt2a	0.380929	2.86025	73;91;96;104;2323;3157	5.94392	2.44551	3.62319e-06	0.0015	0.0012	3058;3892;6111;6119;6124;6142	4.06235	1.37266	0.00023913	0.0136552	0.0135484
Kmt2b	-0.0200584	0.547498	1308;1915;2932;3900;4666;5521	0.50929	0.379186	0.710356	0.991028	0.960405	694;1549;2315;3283;4300;4907	0.615331	0.469354	0.606674	1	0.99152
Kmt2c	-0.114807	0.774801	1496;2062;4428;4458;4820;5982	0.76493	0.386581	0.455954	0.93448	0.932956	233;1395;1757;1787;4153;4719	1.28342	0.664072	0.15335	0.813936	0.813936
Kmt2d	-0.39185	2.11201	2060;5369;5560;5756;6049;6088	2.41692	0.985931	0.0125145	0.232854	0.231489	127;166;459;655;846;4155	3.61541	1.80868	0.000736715	0.0305	0.0305
Kmt2e	0.0102533	0.5126	655;1590;3725;3837;4460;5200	0.557744	0.424508	0.666662	0.990127	0.960405	1015;1755;2378;2490;4625;5560	0.85732	0.439437	0.376885	1	0.99152
Kmt5a	0.0905473	0.696118	347;2103;2107;2253;3087;5269	1.03927	0.596653	0.257762	0.806907	0.80603	946;3128;3962;4108;4112;5868	0.636019	0.408984	0.585091	1	0.99152
Kmt5b	0.204572	1.17538	107;907;989;1165;2855;4489	1.91242	1.00715	0.039535	0.38064	0.38064	1726;3360;5050;5226;5308;6108	1.15146	0.50185	0.202856	0.898209	0.890663
Kmt5c	0.0216372	0.529584	1145;1397;1671;3377;5176;5252	0.81824	0.454002	0.4084	0.907799	0.907076	963;1039;2838;4544;4818;5070	0.695264	0.438492	0.524143	1	0.99152
L3mbtl1	0.0685715	0.667934	1609;1808;2132;2425;3739;4569	0.88824	0.572488	0.353393	0.876075	0.876075	1646;2476;3790;4083;4407;4606	0.780284	0.472931	0.441649	1	0.99152
L3mbtl2	0.124421	0.846947	260;282;1178;3705;4360;4878	1.59083	0.725813	0.0793394	0.499567	0.496604	1337;1855;2510;5037;5933;5955	0.666998	0.410154	0.552987	1	0.99152
L3mbtl3	-0.0120534	0.594847	1024;2086;2181;2871;3008;6052	1.08472	0.480303	0.233982	0.781198	0.779928	163;3207;3344;4034;4129;5191	0.860753	0.509951	0.374337	1	0.99152
L3mbtl4	-0.0833549	0.642963	1456;1823;2683;4174;5163;6002	0.529642	0.346118	0.693778	0.997306	0.960405	213;1052;2041;3532;4392;4759	0.762579	0.551174	0.458286	1	0.99152
Las1l	0.199197	1.18182	425;485;1870;2006;2235;3026	1.87501	1.01266	0.0427138	0.390796	0.390796	3189;3980;4209;4345;5730;5790	1.07479	0.560389	0.239223	0.912797	0.906866
Lbr	-0.0161589	0.508401	276;1488;2936;4104;5296;5722	0.672966	0.402886	0.546874	0.957319	0.957319	493;919;2111;3279;4727;5939	0.762041	0.435868	0.458721	1	0.99152
Leo1	0.147895	0.853645	157;1260;1366;2561;2939;4758	1.12587	0.731623	0.214454	0.773717	0.773717	1457;3276;3654;4849;4955;6058	0.681241	0.386244	0.538443	1	0.99152
LOC100041708	0.0287336	0.303835	3128	0.298105	0.149052	0.799942	0.975482	0.960405	3087	0.303835	0.151917	0.796796	1	0.99152
LOC101055672	-0.0306718	0.39822	3731	0.221546	0.110773	0.839024	0.96622	0.960405	2484	0.39822	0.19911	0.753818	1	0.99152
LOC102639044	-0.0646136	0.448979	4005	0.190769	0.0953844	0.856798	0.96521	0.960405	2210	0.448979	0.224489	0.734031	1	0.99152
LOC115487456	0.0618241	0.343584	2817	0.343584	0.171792	0.777403	0.984235	0.960405	3398	0.262148	0.131074	0.817437	1	0.99152
LOC115488175	-0.417737	1.46669	5579;5847	0.736382	0.263086	0.483594	0.943265	0.943265	368;636	1.97983	0.977611	0.0340169	0.405266	0.405266
LOC115488337	0.0540355	0.433912	2444;3312	0.546562	0.289277	0.677801	0.990678	0.960405	2903;3771	0.433829	0.245579	0.739719	1	0.99152
LOC115489307	-0.0306718	0.39822	3731	0.221546	0.110773	0.839024	0.96622	0.960405	2484	0.39822	0.19911	0.753818	1	0.99152
LOC115489679	-0.410652	1.10584	5728	0.0353682	0.0176841	0.968345	0.987426	0.98684	487	1.10584	0.552921	0.223947	0.897956	0.897879
LOC115489913	-0.0226885	0.384792	3653	0.230722	0.115361	0.833989	0.969183	0.960405	2562	0.384792	0.192396	0.759343	1	0.99152
LOC115489966	0.192207	0.800641	292;1727;3541	0.892673	0.600465	0.350147	0.875897	0.875487	2674;4488;5923	0.377825	0.20054	0.762182	1	0.99152
LOC115490141	-0.72701	1.64724	6075	0.00982497	0.00491248	0.990943	0.994547	0.994547	140	1.64724	0.823622	0.0700133	0.626714	0.619109
LOC115490444	0.105123	0.416429	2382	0.416429	0.208215	0.746524	0.989787	0.960405	3833	0.209832	0.104916	0.845783	1	0.99152
Lrwd1	-0.0569317	0.722445	1683;2988;3573;4479;4858;5094	0.598718	0.434964	0.624232	0.970637	0.960405	1121;1357;1736;2642;3227;4532	0.962846	0.619188	0.302837	0.949807	0.949807
Macroh2a1	-0.0213919	0.640901	2042;2335;2857;3974;4764;4924	0.606319	0.442928	0.616091	0.967975	0.960405	1291;1451;2241;3358;3880;4173	1.03754	0.54935	0.258931	0.926112	0.920769
Macroh2a2	0.0697433	0.643448	576;2077;3004;3290;3750;4071	1.10202	0.551547	0.225496	0.786152	0.777777	2144;2465;2925;3211;4138;5639	0.602879	0.436246	0.619832	1	0.99152
Map3k7	0.0286836	0.518944	562;1520;2092;4357;4681;5086	0.652188	0.44491	0.56826	0.966158	0.960405	1129;1534;1858;4123;4695;5653	0.734797	0.405099	0.485129	1	0.99152
Mapkapk3	0.0643212	0.628802	395;2338;2968;3483;3832;4267	0.979492	0.539012	0.292437	0.82924	0.82924	1948;2383;2732;3247;3877;5820	0.670939	0.428356	0.548938	1	0.99152
Mastl	0.0760355	0.783211	93;272;1771;2926;4822;5932	1.61927	0.671251	0.0744964	0.487613	0.481984	283;1393;3289;4444;5943;6122	0.679078	0.421858	0.540691	1	0.99152
Max	0.101642	0.754769	42;1071;1313;3023;4837;5466	1.4067	0.646991	0.117874	0.602469	0.601022	749;1378;3192;4902;5144;6173	0.586775	0.356239	0.636772	1	0.99152
Maz	0.078338	0.634976	424;1150;2848;3775;4086;4217	1.01021	0.544312	0.274146	0.813595	0.813595	1998;2129;2440;3367;5065;5791	0.566622	0.393653	0.657559	1	0.99152
Mbd1	0.1714	0.981795	199;1357;1617;2027;2694;3792	1.28702	0.841382	0.151861	0.679681	0.679681	2423;3521;4188;4598;4858;6016	0.769859	0.45228	0.451244	1	0.99152
Mbd2	0.0540975	0.584343	1258;1615;2004;3490;3794;4830	0.702774	0.500896	0.516378	0.945931	0.945251	1385;2421;2725;4211;4600;4957	0.588914	0.425583	0.634466	1	0.99152
Mbd3	-3.91953e-05	0.550197	302;1233;4092;4482;4639;5338	0.643397	0.464183	0.577362	0.970672	0.960405	877;1576;1733;2123;4982;5913	1.05268	0.471639	0.250742	0.926848	0.920769
Mbd3l1	0.167893	0.951681	209;947;1907;2501;2954;3481	1.51	0.815601	0.0940362	0.538837	0.538837	2734;3261;3714;4308;5268;6006	0.837382	0.434725	0.392643	1	0.99152
Mbd3l2	0.223281	1.35382	418;644;710;992;2672;3567	2.16242	1.15987	0.0228804	0.284887	0.284887	2648;3543;5223;5505;5571;5797	1.31722	0.63417	0.142692	0.812021	0.809336
Mbd4	0.12154	0.757322	448;711;1450;3416;3608;4533	0.941178	0.649093	0.316969	0.850729	0.850729	1682;2607;2799;4765;5504;5767	0.549748	0.38397	0.674671	1	0.99152
Mbd5	-0.097084	0.969228	2833;3936;4094;4144;4583;5345	0.963811	0.547299	0.302343	0.840067	0.838811	870;1632;2071;2121;2279;3382	1.59841	0.830557	0.0777935	0.64413	0.64413
Mbd6	0.055035	0.593753	1020;1198;1259;3463;4298;5358	1.07399	0.50895	0.239667	0.792192	0.792192	857;1917;2752;4956;5017;5195	0.60425	0.412245	0.61828	1	0.99152
Mbip	0.108062	0.743994	188;1589;2951;3052;3795;3805	1.2781	0.637715	0.155027	0.690118	0.690118	2410;2420;3163;3264;4626;6027	0.698857	0.404122	0.520461	1	0.99152
Mbtd1	0.218285	1.26067	254;554;598;2152;2587;3495	1.88081	1.08015	0.0423406	0.391709	0.390556	2720;3628;4063;5617;5661;5961	1.03417	0.556755	0.260864	0.923056	0.920769
Mcrs1	0.051165	0.574006	526;2153;2992;3163;4334;4520	0.829397	0.492067	0.399243	0.898296	0.898296	1695;1881;3052;3223;4062;5689	0.605534	0.415209	0.616992	1	0.99152
Mdc1	-0.020505	0.590389	1202;2655;3184;3812;3881;5632	0.669443	0.408977	0.550484	0.960592	0.958949	583;2334;2403;3031;3560;5013	0.800925	0.506085	0.423273	1	0.99152
Meaf6	0.300671	1.92866	194;203;686;707;1767;2484	2.70463	1.65199	0.00685266	0.180127	0.178848	3731;4448;5508;5529;6012;6021	1.6898	0.890147	0.0639469	0.594921	0.593654
Mecp2	0.0998994	0.720929	227;419;2373;3935;3973;4949	1.28749	0.617929	0.151796	0.68123	0.679681	1266;2242;2280;3842;5796;5988	0.60089	0.376098	0.62194	1	0.99152
Men1	0.262914	1.53884	127;435;583;1795;2317;2612	2.25839	1.3184	0.0181763	0.271171	0.267292	3603;3898;4420;5632;5780;6088	1.34138	0.669472	0.135611	0.796355	0.796355
Mettl1	0.233026	1.3503	49;170;1377;1760;2037;4845	1.99794	1.15688	0.0329155	0.344987	0.344708	1370;4178;4455;4838;6045;6166	1.10709	0.534133	0.223156	0.914718	0.897879
Mettl11b	-0.0933937	0.886022	3043;3262;3485;3681;5208;5509	0.992793	0.488142	0.284335	0.821742	0.820753	706;1007;2534;2730;2953;3172	1.75223	0.759318	0.055872	0.547479	0.544231
Mettl14	-0.161566	1.05045	2956;3264;4379;4772;5220;5858	0.946616	0.495657	0.31339	0.84386	0.84386	357;995;1443;1836;2951;3259	1.68172	0.900167	0.0649807	0.597822	0.596901
Mettl15	-0.0279003	0.543767	867;1782;2602;4326;5142;5593	0.540032	0.371118	0.684146	0.993812	0.960405	622;1073;1889;3613;4433;5348	0.722543	0.466161	0.497064	1	0.99152
Mettl16	-0.0193558	0.590949	1316;1815;2437;4789;4829;5129	0.56719	0.421397	0.657017	0.990009	0.960405	1086;1386;1426;3778;4400;4899	0.956376	0.506559	0.307035	0.955733	0.954793
Mettl17	0.138037	0.858336	353;1337;2415;2423;3091;3524	1.47801	0.735626	0.100972	0.561107	0.561107	2691;3124;3792;3800;4878;5862	0.817599	0.441299	0.409095	1	0.99152
Mettl18	-0.0596498	0.730397	1088;3000;4182;4626;4750;5154	0.671274	0.444511	0.548585	0.959299	0.958949	1061;1465;1589;2033;3215;5127	1.10903	0.625982	0.222268	0.91334	0.897879
Mettl2	0.131139	0.810066	69;567;2887;3062;3883;4630	1.20062	0.694342	0.182754	0.73635	0.734979	1585;2332;3153;3328;5648;6146	0.57481	0.360825	0.649152	1	0.99152
Mettl21a	-0.0977046	0.7134	451;1360;3880;4756;5665;5965	0.5884	0.402348	0.635024	0.980056	0.960405	250;550;1459;2335;4855;5764	1.09092	0.61147	0.231053	0.906692	0.904349
Mettl21c	0.107927	0.717547	747;965;2327;2532;3701;4263	0.981935	0.615013	0.29086	0.829026	0.829026	1952;2514;3683;3888;5250;5468	0.550716	0.403902	0.673698	1	0.99152
Mettl22	-0.0325261	0.577603	1379;1687;3012;3642;5292;5511	0.518235	0.380555	0.703345	0.996356	0.960405	704;923;2573;3203;4528;4836	0.759582	0.495147	0.460999	1	0.99152
Mettl23	0.129457	1.18249	41;593;629;1552;2699;6093	1.82218	1.01322	0.0479541	0.413604	0.409426	122;3516;4663;5586;5622;6174	0.999813	0.585442	0.280244	0.931896	0.928944
Mettl24	0.10546	0.839426	951;1838;2771;2815;2975;3116	1.79864	0.719391	0.0504601	0.41781	0.41781	3099;3240;3400;3444;4377;5264	1.02356	0.529339	0.266588	0.93334	0.920769
Mettl25	0.263603	1.5842	61;673;820;1051;1402;4019	2.56601	1.35722	0.00893116	0.199865	0.196205	2196;4813;5164;5395;5542;6154	1.63355	0.685982	0.0721546	0.619109	0.619109
Mettl27	-0.0886673	0.678598	1592;2046;2465;3152;5472;6038	0.617781	0.373456	0.604087	0.973121	0.960405	177;743;3063;3750;4169;4623	0.889892	0.581705	0.35219	0.990197	0.990197
Mettl3	0.123683	0.791524	786;790;2190;2266;3849;3909	1.20783	0.678376	0.179729	0.72949	0.728797	2306;2366;3949;4025;5425;5429	0.659444	0.429805	0.560793	1	0.99152
Mettl4	0.0569098	0.620669	1195;1578;1759;2193;3747;5561	1.01131	0.531991	0.273708	0.816685	0.813595	654;2468;4022;4456;4637;5020	0.62335	0.439576	0.598216	1	0.99152
Mettl5	0.00587172	0.528047	528;2581;3153;4065;4418;5122	0.519499	0.428428	0.70228	0.996552	0.960405	1093;1797;2150;3062;3634;5687	0.768532	0.452662	0.452508	1	0.99152
Mettl6	-0.00364585	0.648114	1986;2431;3315;3644;4304;4632	0.765616	0.482986	0.455327	0.934352	0.932956	1583;1911;2571;2900;3784;4229	1.0028	0.555517	0.278448	0.935314	0.928944
Mettl7b	-0.084265	0.713262	1298;1828;2226;5239;5285;5851	0.729133	0.400261	0.490822	0.945119	0.94349	364;930;976;3989;4387;4917	1.33335	0.611345	0.138033	0.80771	0.80543
Mettl8	-0.00980279	0.555842	1157;1196;3248;4503;4670;5264	0.626551	0.416639	0.594905	0.975408	0.960405	951;1545;1712;2967;5019;5058	0.79847	0.476494	0.42539	1	0.99152
Mettl9	0.123318	0.849817	983;1117;1882;1892;2460;4825	1.45291	0.728268	0.106514	0.568994	0.567408	1390;3755;4323;4333;5098;5232	0.871882	0.478502	0.3658	1	0.99152
Mga	-0.0730675	0.758011	646;3309;4371;4584;5024;5396	0.740879	0.451463	0.479173	0.946909	0.943265	819;1191;1631;1844;2906;5569	1.24013	0.64963	0.167756	0.829266	0.829266
Mgmt	0.0564556	0.656196	1333;1407;1751;1850;4888;5066	1.23568	0.562429	0.169464	0.714076	0.712851	1149;1327;4365;4464;4808;4882	0.738434	0.46737	0.481553	1	0.99152
Mllt1	0.235992	1.32621	52;614;1168;1554;1950;4089	1.90209	1.13639	0.0406425	0.386805	0.385034	2126;4265;4661;5047;5601;6163	1.16505	0.536411	0.197353	0.88568	0.88568
Mllt10	0.133576	0.850657	224;371;1120;3506;3669;5137	1.37884	0.729017	0.124868	0.620967	0.620967	1078;2546;2709;5095;5844;5991	0.657899	0.395885	0.562385	1	0.99152
Mllt6	0.00718582	0.548208	1265;1385;1971;4505;4904;4973	0.692119	0.451681	0.527335	0.954389	0.951723	1242;1311;1710;4244;4830;4950	0.799414	0.469957	0.424669	1	0.99152
Morc2a	-0.941486	4.88476	3426;6103;6147;6192;6202;6209	5.83176	2.47741	3.62319e-06	0.0012	0.0012	6;13;23;68;112;2789	7.95051	4.16275	0	0	0
Morf4l1	-0.300523	1.68867	2731;3940;5531;5723;5865;5977	1.72752	0.771459	0.0589432	0.454	0.450284	238;350;492;684;2275;3484	2.75846	1.44648	0.00569928	0.127541	0.127541
Morf4l2	0.0420555	0.652109	1462;2739;2810;3082;3613;4229	1.0028	0.558936	0.278448	0.816124	0.815058	1986;2602;3133;3405;3476;4753	0.839244	0.525346	0.391133	1	0.99152
Mov10	0.0305387	0.537225	427;1846;2657;4365;4647;4714	0.71989	0.460579	0.499479	0.948553	0.944038	1501;1568;1850;3558;4369;5788	0.738028	0.418921	0.481912	1	0.99152
Mphosph8	-0.556297	2.80891	2262;5670;5802;6033;6132;6187	3.13457	1.31287	0.00223551	0.0881429	0.0873023	28;83;182;413;545;3953	4.54659	2.40427	8.81643e-05	0.00663636	0.00663636
Mrgbp	0.220345	1.38092	534;875;984;1534;1658;2931	2.22557	1.18312	0.0198213	0.278169	0.2764	3284;4557;4681;5231;5340;5681	1.38949	0.681944	0.122039	0.756914	0.751708
Msh6	0.18267	1.0737	380;563;909;2933;3174;3224	1.70986	0.920061	0.061337	0.457541	0.456439	2991;3041;3282;5306;5652;5835	0.964958	0.498668	0.301655	0.947894	0.947894
Msl1	0.202344	1.20739	262;1068;1306;2125;2445;2555	2.31588	1.03458	0.0162572	0.26922	0.267292	3660;3770;4090;4909;5147;5953	1.38249	0.571571	0.124069	0.75536	0.751708
Msl2	-0.0204901	0.65612	1393;1585;4197;4445;4498;4786	0.680391	0.468697	0.539222	0.956051	0.955032	1429;1717;1770;2018;4630;4822	1.11878	0.562365	0.217722	0.90137	0.897879
Msl3	0.132578	0.798375	245;588;2416;3035;3754;4088	1.09116	0.684283	0.23086	0.778623	0.777777	2127;2461;3180;3799;5627;5970	0.597286	0.381945	0.625635	1	0.99152
Mst1	0.0128227	0.566189	74;2083;3552;3806;4289;5807	1.172	0.485432	0.194476	0.742055	0.741168	408;1926;2409;2663;4132;6141	0.78195	0.429428	0.440128	1	0.99152
Mta1	0.294361	1.82648	90;235;322;990;1819;3784	2.62484	1.56444	0.00799034	0.183778	0.183778	2431;4396;5225;5893;5980;6125	1.48978	0.791833	0.0984988	0.728187	0.726062
Mta2	-0.0405218	0.599161	288;2474;3614;3851;5479;5629	0.658876	0.411411	0.561411	0.964415	0.960405	586;736;2364;2601;3741;5927	0.895892	0.513592	0.347967	0.985015	0.985015
Mta3	-0.0059062	0.494502	713;1559;2277;3246;4255;5975	0.601612	0.399531	0.621171	0.969519	0.960405	240;1960;2969;3938;4656;5502	0.720539	0.42399	0.498921	1	0.99152
Mtf2	0.0839212	0.662612	757;1505;1788;1995;4271;4972	1.13395	0.567937	0.210848	0.770781	0.77	1243;1944;4220;4427;4710;5458	0.684085	0.406815	0.535572	1	0.99152
Mybbp1a	0.0409551	0.581637	223;2045;2097;2294;4937;5652	0.95519	0.498619	0.307754	0.839605	0.838811	563;1278;3921;4118;4170;5992	0.597795	0.40209	0.62513	1	0.99152
Myo1c	0.234137	1.48139	237;624;985;1010;1278;4331	2.75605	1.26908	0.00573671	0.166667	0.166667	1884;4937;5205;5230;5591;5978	1.77245	0.695777	0.0534058	0.536	0.535819
Mysm1	0.0808877	0.915371	112;335;1225;1874;5715;5730	1.45683	0.784479	0.1057	0.568312	0.567408	485;500;4341;4990;5880;6103	1.15844	0.523967	0.200101	0.890774	0.890663
Naa60	0.0397171	0.59991	589;1637;1783;2863;3099;5936	1.03251	0.514225	0.261634	0.809843	0.80898	279;3116;3352;4432;4578;5626	0.669368	0.433589	0.550577	1	0.99152
Nap1l1	0.106866	0.725832	702;1692;1962;2388;3610;4171	1.03879	0.622103	0.257969	0.80603	0.80603	2044;2605;3827;4253;4523;5513	0.577065	0.420579	0.646777	1	0.99152
Nap1l2	-0.0278697	0.662848	2390;2434;2879;3314;4578;5382	0.691089	0.44603	0.528385	0.952128	0.952128	833;1637;2901;3336;3781;3825	1.26444	0.568159	0.159818	0.827056	0.821636
Nap1l4	0.127955	0.922505	1184;1336;2228;2443;2892;2991	1.90533	0.790546	0.0404348	0.387052	0.385034	3224;3323;3772;3987;4879;5031	1.09533	0.544258	0.228787	0.904229	0.904229
Nasp	-0.0625683	0.71659	767;2780;4393;4609;4907;5327	0.749984	0.435876	0.470368	0.940737	0.937856	888;1308;1606;1822;3435;5448	1.25662	0.614153	0.162304	0.824466	0.821636
Nat10	-0.0942513	0.640027	574;2264;3106;3382;4162;6163	0.573389	0.374005	0.650617	0.991189	0.960405	52;2053;2833;3109;3951;5641	1.31746	0.54869	0.142579	0.81699	0.809336
Nbn	0.156366	0.967425	844;913;1084;1807;2836;4316	1.26802	0.829004	0.158408	0.699531	0.699531	1899;3379;4408;5131;5302;5371	0.75632	0.493595	0.464239	1	0.99152
Ncl	0.205837	1.15277	5;2005;2182;2257;3236;3421	2.318	0.987994	0.0161329	0.269859	0.267292	2794;2979;3958;4033;4210;6210	0.865719	0.444818	0.370378	1	0.99152
Ncoa1	0.0467288	0.561903	1061;1848;2377;3609;4142;4565	0.803583	0.481683	0.420942	0.916005	0.915565	1650;2073;2606;3838;4367;5154	0.539475	0.426848	0.684621	1	0.99152
Ncoa2	-0.198219	1.46091	3803;4439;4989;5133;5231;5486	1.49096	0.754397	0.0981763	0.551119	0.551119	729;984;1082;1226;1776;2412	2.46596	1.2516	0.0113937	0.207341	0.206739
Ncoa3	-0.218638	1.35225	1943;4457;5021;5344;5721;5769	1.30696	0.637707	0.14571	0.674011	0.672312	446;494;871;1194;1758;4272	2.10804	1.15853	0.0258587	0.348146	0.346484
Ncoa6	-0.0547993	0.702129	2102;3019;3166;3300;4574;5693	0.606527	0.425194	0.615938	0.968655	0.960405	522;1641;2915;3049;3196;4113	1.07528	0.601813	0.238816	0.913349	0.906866
Ncor1	0.231075	1.41606	88;596;1173;1209;1324;4800	2.68333	1.21322	0.00710507	0.181015	0.178848	1415;4891;5006;5042;5619;6127	1.7191	0.627295	0.0602379	0.570023	0.570023
Ncor2	0.221252	1.25324	32;464;478;1999;3749;4596	2.14509	1.07382	0.0236969	0.288544	0.288544	1619;2466;4216;5737;5751;6183	1.19236	0.481748	0.185964	0.867482	0.867482
Nek6	0.225368	1.21873	33;616;821;2158;2701;4302	1.52068	1.04436	0.0922572	0.534189	0.532913	1913;3514;4057;5394;5599;6182	0.828865	0.461084	0.399581	1	0.99152
Nek9	-0.0968237	0.930312	2976;3284;3645;4732;4984;5136	0.957059	0.518393	0.306512	0.840371	0.838811	1079;1231;1483;2570;2931;3239	1.69776	0.797237	0.0630652	0.593386	0.593386
Nfrkb	-0.304558	1.57867	1391;3652;5585;5775;5809;6096	1.82218	0.703738	0.0479541	0.413604	0.409426	119;406;440;630;2563;4824	2.89288	1.35223	0.0042971	0.114774	0.114774
Nfyb	-0.125974	0.836139	723;1700;4169;5425;5448;5946	0.852383	0.425803	0.380732	0.886768	0.883194	269;767;790;2046;4515;5492	1.56336	0.716562	0.0839396	0.674777	0.662757
Nfyc	-0.0969169	0.711943	1881;2140;2610;3746;5488;5990	0.538922	0.367257	0.685129	0.992628	0.960405	225;727;2469;3605;4075;4334	0.938894	0.61026	0.31825	0.959967	0.958011
Nipbl	-0.409184	1.8574	3125;4076;4564;5921;6030;6184	1.56082	0.757084	0.0846353	0.509658	0.509658	31;185;294;1651;2139;3090	2.73719	1.59096	0.00599879	0.130711	0.130711
Noc2l	0.150623	0.887766	6;941;2620;3413;4388;4686	2.23917	0.76101	0.0193152	0.280579	0.2764	1529;1827;2802;3595;5274;6209	0.52507	0.339899	0.697733	1	0.99152
Npas2	-0.0731945	0.678245	749;2872;3513;4464;5386;5630	0.571742	0.38329	0.652271	0.990064	0.960405	585;829;1751;2702;3343;5466	0.903361	0.581338	0.342664	0.978366	0.978366
Npcd	0.021963	0.517825	2778;3056;3756	0.655937	0.369091	0.564355	0.966465	0.960405	2459;3159;3437	0.771575	0.388368	0.449484	1	0.99152
Npm1	-0.326074	1.64261	3706;4005;4494;5322;6069;6083	1.41653	0.707592	0.115449	0.593739	0.593739	132;146;893;1721;2210;2509	2.36322	1.40714	0.0143659	0.240303	0.240303
Npm2	0.0313863	0.703765	2444;2558;2720;2950;3312;4447	0.918927	0.603172	0.331457	0.86576	0.864575	1768;2903;3265;3495;3657;3771	1.30149	0.597659	0.147489	0.81414	0.811802
Nsd1	-0.256377	1.87232	4588;5089;5110;5317;5436;5556	2.26485	0.98834	0.0179275	0.277458	0.267292	659;779;898;1105;1126;1627	3.4919	1.60377	0.00100362	0.0377727	0.0377727
Nsd2	-0.342575	2.19691	4889;5051;5160;5770;5779;5912	2.68178	1.10834	0.00712802	0.178848	0.178848	303;436;445;1055;1164;1326	4.02497	1.8816	0.000253623	0.0135484	0.0135484
Nsd3	-0.208063	1.26384	1438;4285;4951;5450;5604;5827	1.17891	0.596141	0.191322	0.740257	0.739824	388;611;765;1264;1930;4777	1.92244	1.08281	0.0388442	0.437592	0.436473
Nsl1	-0.057901	0.738731	280;741;1371;2207;5908;6142	1.00329	0.603618	0.278157	0.816716	0.815058	73;307;4008;4844;5474;5935	1.52439	0.633207	0.0912729	0.690174	0.690174
Ntmt1	0.0641901	0.600453	912;1924;2341;2763;4079;4593	0.787649	0.514702	0.434932	0.92696	0.92696	1622;2136;3452;3874;4291;5303	0.535304	0.41542	0.688612	1	0.99152
Nudt16	0.109478	0.87376	134;1621;1843;1935;2150;5836	1.71093	0.748816	0.0611896	0.458507	0.456439	379;4065;4280;4372;4594;6081	1.03707	0.474946	0.259109	0.92475	0.920769
Nudt16l1	0.012283	0.51506	1156;2019;2068;2819;4848;5481	0.722076	0.429968	0.497463	0.947984	0.944038	734;1367;3396;4147;4196;5059	0.570707	0.44157	0.653309	1	0.99152
Nudt21	-0.236857	1.40382	3760;4200;4633;5031;5273;6035	1.45752	0.649949	0.105483	0.56899	0.567408	180;942;1184;1582;2015;2455	2.41992	1.2028	0.0124674	0.219638	0.219638
Oga	0.0170439	0.511779	291;2549;2955;3665;4642;5278	0.655475	0.43878	0.5648	0.966227	0.960405	937;1573;2550;3260;3666;5924	0.754915	0.420034	0.465675	1	0.99152
Ogt	-0.407976	2.11186	2304;5106;5471;5898;6064;6113	1.98982	0.959627	0.0333961	0.34565	0.344708	102;151;317;744;1109;3911	3.04942	1.80856	0.0027186	0.0776207	0.0776207
Padi1	0.188447	0.983038	12;981;1275;2798;3442;4964	1.94024	0.842565	0.0375254	0.367704	0.367704	1251;2773;3417;4940;5234;6203	0.59889	0.35371	0.624042	1	0.99152
Padi2	0.0927181	0.64665	390;1161;1810;2531;4320;5023	0.838564	0.554298	0.391711	0.889813	0.889813	1192;1895;3684;4405;5054;5825	0.550877	0.357293	0.673502	1	0.99152
Padi3	-0.0550383	0.633155	59;1170;1827;3135;5671;6158	1.26508	0.539166	0.159537	0.70078	0.70078	57;544;3080;4388;5045;6156	1.27936	0.54281	0.154716	0.818562	0.816325
Padi4	-0.0309646	0.657045	617;2512;4358;4477;4587;5073	0.735602	0.455748	0.484286	0.943504	0.94349	1142;1628;1738;1857;3703;5598	1.23051	0.563141	0.17142	0.834918	0.834918
Paf1	-0.170992	1.10975	436;4243;4920;4940;5735;5852	1.15004	0.570801	0.203603	0.762819	0.761639	363;480;1275;1295;1972;5779	1.87997	0.950854	0.0423696	0.45561	0.45561
Pagr1a	-0.451022	2.05125	2876;4967;5068;5439;6149;6186	1.80848	0.854548	0.0495628	0.414525	0.414525	29;66;776;1147;1248;3339	2.805	1.75661	0.00515821	0.122029	0.120394
Pak2	0.0396825	0.526165	668;1694;1799;3740;4726;5105	0.759312	0.451082	0.461272	0.93611	0.935882	1110;1489;2475;4416;4521;5547	0.560205	0.395102	0.664114	1	0.99152
Parg	0.212358	1.2357	244;731;1454;1519;2091;3391	1.76509	1.05882	0.054564	0.436512	0.436346	2824;4124;4696;4761;5484;5971	1.07291	0.561335	0.240083	0.909789	0.906866
Parp1	0.0883826	0.680159	1151;1269;1558;2938;3829;4513	0.877456	0.582972	0.36135	0.88259	0.880799	1702;2386;3277;4657;4946;5064	0.533265	0.421903	0.690495	1	0.99152
Parp2	0.0569301	0.591807	404;1660;3407;3592;3617;4810	0.775862	0.507323	0.445662	0.933016	0.931354	1405;2598;2623;2808;4555;5811	0.726059	0.407685	0.493622	1	0.99152
Parp3	0.140842	0.911996	25;2344;2745;2853;2905;4278	1.62603	0.781685	0.0734964	0.4849	0.481984	1937;3310;3362;3470;3871;6190	0.692494	0.425003	0.526918	1	0.99152
Paxip1	-0.854592	4.30456	5334;5422;5933;6190;6204;6211	3.65695	2.07482	0.000669082	0.0395714	0.0395714	4;11;25;282;793;881	5.89052	3.67354	3.62319e-06	0.000428571	0.0004
Pbk	0.0376457	0.566144	264;1712;2995;4440;4450;4734	0.708858	0.485367	0.510373	0.945389	0.944038	1481;1765;1775;3220;4503;5951	0.769747	0.413914	0.45136	1	0.99152
Pbrm1	-0.560646	3.63465	5812;5829;5857;5883;6008;6127	5.19662	1.95475	2.41546e-05	0.00363636	0.00363636	88;207;332;358;386;403	7.1284	3.11027	0	0	0
Pcgf1	0.0318831	0.505081	697;1244;2880;3358;4023;5554	0.618684	0.433014	0.603182	0.976413	0.960405	661;2192;2857;3335;4971;5518	0.57327	0.38939	0.650657	1	0.99152
Pcgf2	0.0581447	0.648433	621;2594;3094;3363;3436;4253	0.988055	0.555809	0.287269	0.824468	0.824468	1962;2779;2852;3121;3621;5594	0.774131	0.469606	0.447254	1	0.99152
Pcgf3	-0.0706032	0.715892	1715;3180;3344;3885;4178;5879	0.65122	0.407329	0.569255	0.964878	0.960405	336;2037;2330;2871;3035;4500	1.06899	0.613608	0.242076	0.906964	0.906964
Pcgf5	0.0407994	0.563218	1176;1576;2169;2703;3555;5631	0.80316	0.482787	0.421301	0.915583	0.915565	584;2660;3512;4046;4639;5039	0.546161	0.429265	0.678132	1	0.99152
Pcgf6	0.115376	0.718817	173;1239;1608;3146;3545;4962	0.850368	0.616143	0.382397	0.883194	0.883194	1253;2670;3069;4607;4976;6042	0.533139	0.348756	0.690558	1	0.99152
Pcna	-0.21882	1.19385	1628;3045;4939;5291;5914;5937	1.06175	0.523176	0.245913	0.798494	0.795743	278;301;924;1276;3170;4587	1.77363	1.02288	0.0533345	0.538549	0.535819
Pcna-ps2	-0.203089	0.970723	1628;4939;5291;5914	0.797035	0.338815	0.426679	0.922428	0.922235	301;924;1276;4587	1.56032	0.776441	0.0847874	0.675038	0.662757
Pdp1	0.0115453	0.501461	937;2104;2426;3941;4137;5397	0.581212	0.412487	0.64239	0.984998	0.960405	818;2078;2274;3789;4111;5278	0.602337	0.429907	0.620397	1	0.99152
Pelp1	-0.216991	1.26828	354;4226;4684;5650;5864;5974	1.13861	0.628361	0.20879	0.773503	0.77	241;351;565;1531;1989;5861	1.94714	1.08656	0.0366292	0.424182	0.424125
Phc1	-0.077507	0.80373	2611;2928;3233;3451;3526;5992	0.816235	0.476313	0.410146	0.908024	0.908024	223;2689;2764;2982;3287;3604	1.41952	0.688865	0.114368	0.760618	0.751708
Phc2	0.0590424	0.563998	666;1329;2578;3721;3758;4943	0.717064	0.483489	0.502267	0.94625	0.944038	1272;2457;2494;3637;4886;5549	0.556879	0.385271	0.667505	1	0.99152
Phc3	0.0577654	0.567862	489;1218;1898;4047;4484;4942	0.719065	0.486815	0.500397	0.949207	0.944038	1273;1731;2168;4317;4997;5726	0.629942	0.377573	0.591179	1	0.99152
Phf1	0.132789	0.805947	559;1025;1425;2481;3150;4506	1.00423	0.690729	0.277697	0.818267	0.815058	1709;3065;3734;4790;5190;5656	0.618585	0.40795	0.603236	1	0.99152
Phf10	-0.256474	1.34247	3584;4044;4262;4835;5362;6140	1.32793	0.579309	0.139353	0.665037	0.659259	75;853;1380;1953;2171;2631	2.2395	1.15033	0.0188792	0.281658	0.281658
Phf12	-0.517297	2.64868	2982;5474;5727;6021;6098;6172	2.6306	1.23105	0.00789976	0.184254	0.183778	43;117;194;488;741;3233	3.89476	2.26761	0.000324879	0.0153714	0.0153714
Phf13	0.100192	0.668359	306;969;2141;2961;3433;5193	0.859506	0.5729	0.375211	0.887643	0.883194	1022;2782;3254;4074;5246;5909	0.553233	0.352669	0.671266	1	0.99152
Phf14	0.0490176	0.681976	1936;2198;2288;3502;3769;3897	1.21585	0.584522	0.176772	0.726387	0.725069	2318;2446;2713;3927;4017;4279	0.972174	0.539313	0.296929	0.943789	0.943789
Phf19	-0.0890664	0.789904	2489;2800;3295;4542;4742;5696	0.73042	0.423851	0.489382	0.946748	0.94349	519;1473;1673;2920;3415;3726	1.33277	0.676999	0.138129	0.80543	0.80543
Phf2	-0.0249059	0.546306	578;2241;3569;3595;4957;5616	0.534281	0.383105	0.689542	0.995538	0.960405	599;1258;2620;2646;3974;5637	0.788927	0.468324	0.43385	1	0.99152
Phf20	-0.0474737	0.659926	1866;2510;2977;4060;5103;5315	0.519717	0.403605	0.702136	0.997202	0.960405	900;1112;2155;3238;3705;4349	0.929891	0.565654	0.32417	0.967254	0.965382
Phf20l1	-0.0955343	0.754749	1351;3417;3704;4183;4803;5866	0.730076	0.394152	0.489687	0.946233	0.94349	349;1412;2032;2511;2798;4864	1.21432	0.646884	0.177286	0.855936	0.855936
Phf21a	0.140391	0.852316	636;1113;1655;2184;3403;3788	1.28977	0.730448	0.15107	0.681668	0.679681	2427;2812;4031;4560;5102;5579	0.70553	0.43998	0.51374	1	0.99152
Phf21b	0.0880989	0.667802	804;1249;1733;2139;4247;4919	1.04304	0.572387	0.255751	0.805179	0.80422	1296;1968;4076;4482;4966;5411	0.638472	0.400101	0.582502	1	0.99152
Phf23	0.054323	0.619348	256;904;1318;3379;5093;5634	1.02993	0.530927	0.263243	0.810279	0.80898	581;1122;2836;4897;5311;5959	0.656597	0.39012	0.563744	1	0.99152
Phf3	0.0667661	0.647699	1075;1970;2582;3321;3791;3947	1.18262	0.555173	0.190024	0.738685	0.738685	2268;2424;2894;3633;4245;5140	0.645648	0.459977	0.574955	1	0.99152
Phf8	-0.00819484	0.501783	850;1584;1942;3384;4676;5913	0.702556	0.395434	0.516577	0.945251	0.945251	302;1539;2831;4273;4631;5365	0.643397	0.430227	0.577362	1	0.99152
Phip	-0.00389836	0.54307	1103;2219;2688;2841;5107;5395	0.714219	0.413055	0.504992	0.948147	0.944038	820;1108;3374;3527;3996;5112	0.662733	0.465557	0.557395	1	0.99152
Phrf1	0.103522	0.797307	978;2015;2438;2526;2889;3717	1.33907	0.683312	0.136211	0.655715	0.655715	2498;3326;3689;3777;4200;5237	0.734105	0.499005	0.485766	1	0.99152
Piwil4	0.0341168	0.535195	1041;1370;1604;3132;4475;5576	0.852482	0.458794	0.380605	0.887721	0.883194	639;1740;3083;4611;4845;5174	0.519089	0.409485	0.702609	1	0.99152
Pkm	-0.143308	0.79422	1836;2430;2557;3392;5563;6135	0.561199	0.370866	0.663056	0.990993	0.960405	80;652;2823;3658;3785;4379	1.14027	0.680772	0.208013	0.892409	0.890663
Pkn1	0.0742227	0.63144	898;931;1610;2505;4150;5420	0.850392	0.541236	0.382266	0.885359	0.883194	795;2065;3710;4605;5284;5317	0.555173	0.396132	0.669303	1	0.99152
Pml	0.132318	1.05549	221;255;868;1459;3651;5943	1.67036	0.90435	0.0667669	0.480722	0.480017	272;2564;4756;5347;5960;5994	0.936199	0.531681	0.319915	0.958011	0.958011
Pogz	0.188268	1.10691	212;1235;1829;1902;2088;3427	1.76789	0.948531	0.0539106	0.435493	0.433816	2788;4127;4313;4386;4980;6003	1.07478	0.520297	0.239266	0.91086	0.906866
Pole3	0.158875	0.940993	258;837;903;1890;3253;5012	1.41661	0.806387	0.115423	0.595452	0.593739	1203;2962;4325;5312;5378;5957	0.772691	0.429516	0.448638	1	0.99152
POTENTIALLY_ACTIVE_1	-0.02239	0.384284	3650	0.231078	0.115539	0.833793	0.969636	0.960405	2565	0.384284	0.192142	0.759566	1	0.99152
POTENTIALLY_ACTIVE_2	0.0698388	0.357845	2726	0.357845	0.178923	0.770946	0.983579	0.960405	3489	0.25067	0.125335	0.823349	1	0.99152
POTENTIALLY_ACTIVE_3	-0.45767	1.18592	5810	0.0291951	0.0145976	0.973767	0.988087	0.98684	405	1.18592	0.592958	0.188541	0.874577	0.873047
POTENTIALLY_ACTIVE_4	-0.0620335	0.444872	3984	0.193052	0.096526	0.855403	0.965609	0.960405	2231	0.444872	0.222436	0.735574	1	0.99152
POTENTIALLY_ACTIVE_5	0.116823	0.437537	2269	0.437537	0.218768	0.738357	0.991663	0.960405	3946	0.197214	0.0986071	0.852953	1	0.99152
POTENTIALLY_ACTIVE_6	0.306188	0.925315	738	0.925315	0.462657	0.327187	0.861402	0.861402	5477	0.0548285	0.0274143	0.952004	0.994021	0.99152
POTENTIALLY_ACTIVE_7	0.125111	0.453324	2188	0.453324	0.226662	0.732457	0.987743	0.960405	4027	0.18839	0.0941948	0.858223	1	0.99152
Ppargc1a	0.205202	1.17625	261;676;740;2499;2523;3471	1.63659	1.00788	0.0718043	0.491355	0.481984	2744;3692;3716;5475;5539;5954	0.893311	0.525882	0.349739	0.988341	0.988341
Pphln1	-0.771133	3.03736	480;582;1192;1241;5461;5666;5760;5786;6047;6126;6177;6196	3.7978	1.42869	0.00040942	0.02825	0.02825	19;38;89;168;429;455;549;754;4974;5023;5633;5735	4.04463	2.59587	0.000247585	0.0136667	0.0135484
Ppm1g	-0.0197778	0.575476	1028;1569;3523;4492;4850;5143	0.528718	0.409054	0.694576	0.99586	0.960405	1072;1365;1723;2692;4646;5187	0.793313	0.493302	0.430059	1	0.99152
Ppp2ca	0.0433778	0.852672	269;457;917;1697;5206;6077	1.4	0.730711	0.119411	0.604722	0.604722	138;1009;4518;5298;5758;5946	0.924108	0.54877	0.328171	0.966996	0.965929
Ppp4c	-0.119304	0.835635	643;784;2937;5542;5747;6011	0.954732	0.480913	0.308042	0.83901	0.838811	204;468;673;3278;5431;5572	1.74439	0.71613	0.0566993	0.545895	0.544231
Ppp4r2	-0.00981916	0.512408	600;1035;1723;3473;5088;5985	0.793313	0.427042	0.430059	0.926109	0.925088	230;1127;2742;4492;5180;5615	0.73539	0.439348	0.484482	1	0.99152
Ppp4r3a	0.0523677	0.654167	499;1012;1471;2135;5455;5484	1.04544	0.560733	0.254595	0.803067	0.803067	731;760;4080;4744;5203;5716	0.875649	0.442429	0.362874	1	0.99152
Ppp4r3b	0.0674096	0.625605	400;1681;2196;2809;2985;5662	1.09829	0.536251	0.227309	0.789149	0.777777	553;3230;3406;4019;4534;5815	0.666536	0.398682	0.55347	1	0.99152
Prdm1	0.0790553	0.622852	725;1135;2429;2556;4337;4672	0.827405	0.5339	0.400868	0.899509	0.898463	1543;1878;3659;3786;5080;5490	0.546938	0.386263	0.677432	1	0.99152
Prdm10	0.0423634	0.68163	89;772;1307;4281;5331;5751	1.09716	0.584325	0.228017	0.788301	0.777777	464;884;1934;4908;5443;6126	0.784323	0.435524	0.438071	1	0.99152
Prdm11	-0.00321325	0.53078	452;2297;2909;4543;4720;5198	0.524072	0.419509	0.698554	0.996388	0.960405	1017;1495;1672;3306;3918;5763	0.817747	0.455007	0.408896	1	0.99152
Prdm12	0.0132556	0.530123	362;2009;3724;4108;4558;4932	0.602089	0.454494	0.62074	0.96976	0.960405	1283;1657;2107;2491;4206;5853	0.856855	0.448622	0.37724	1	0.99152
Prdm13	0.0577306	0.619081	1140;1684;2497;3773;4011;4031	1.12775	0.530664	0.213615	0.774061	0.773541	2184;2204;2442;3718;4531;5075	0.616298	0.454103	0.605671	1	0.99152
Prdm14	0.0486484	0.571978	278;2446;2593;2734;4037;5433	0.753784	0.490335	0.466789	0.941537	0.937856	782;2178;3481;3622;3769;5937	0.712667	0.396431	0.506589	1	0.99152
Prdm15	0.271553	1.83992	110;143;341;592;1978;5222	2.99507	1.57566	0.00355435	0.122625	0.120367	993;4237;5623;5874;6072;6105	1.89453	0.83451	0.0412452	0.449355	0.448575
Prdm16	0.0372888	0.572422	498;995;1409;3804;4070;5871	0.967384	0.490698	0.300138	0.840995	0.838811	344;2145;2411;4806;5220;5717	0.602327	0.404462	0.62046	1	0.99152
Prdm2	0.0737	0.621838	739;1172;1722;3934;4231;4504	0.838637	0.533038	0.391588	0.890755	0.889813	1711;1984;2281;4493;5043;5476	0.60065	0.399658	0.622141	1	0.99152
Prdm4	0.0307634	0.502917	891;1612;2600;2925;4434;5380	0.685505	0.431152	0.533937	0.956926	0.955032	835;1781;3290;3615;4603;5324	0.52209	0.399606	0.700182	1	0.99152
Prdm5	0.062036	0.608673	709;727;3327;3445;3757;5049	0.903728	0.521752	0.34236	0.872228	0.868577	1166;2458;2770;2888;5488;5506	0.697903	0.4088	0.521399	1	0.99152
Prdm6	0.0746884	0.726466	294;577;2408;2670;2847;5948	1.1829	0.622648	0.18992	0.740019	0.738685	267;3368;3545;3807;5638;5921	0.712452	0.431224	0.506702	1	0.99152
Prdm8	-0.0324649	0.621144	1119;2028;4003;4375;4486;5309	0.618274	0.41215	0.603593	0.975171	0.960405	906;1729;1840;2212;4187;5096	1.00044	0.532414	0.279865	0.932507	0.928944
Prdm9	0.167445	0.96131	133;682;861;3560;3660;4032	1.4684	0.823839	0.103184	0.565801	0.565801	2183;2555;2655;5354;5533;6082	0.800426	0.422198	0.423664	1	0.99152
Prkaa1	-0.0890648	0.665128	960;1968;3107;4166;5657;5900	0.50515	0.353954	0.714512	0.987673	0.960405	315;558;2049;3108;4247;5255	1.08083	0.570127	0.23597	0.915143	0.906866
Prkaa2	0.148457	0.967951	899;1386;1682;1952;2919;3204	1.72607	0.829472	0.0590495	0.452713	0.450284	3011;3296;4263;4533;4829;5316	0.975581	0.528314	0.294826	0.942533	0.942533
Prkab1	-0.146124	1.13651	3389;3886;4422;4729;4777;5612	1.19691	0.590344	0.18411	0.73644	0.734979	603;1438;1486;1793;2329;2826	2.05319	0.973833	0.0291027	0.373597	0.365835
Prkab2	0.195519	1.08483	174;301;1643;2215;3108;3813	1.53977	0.9296	0.0884662	0.515845	0.514204	2402;3107;4000;4572;5914;6041	0.695739	0.453629	0.523575	1	0.99152
Prkag1	0.0995032	0.708639	431;650;1631;4022;4165;4497	0.976761	0.607402	0.294159	0.832697	0.831754	1718;2050;2193;4584;5565;5784	0.623079	0.39039	0.59855	1	0.99152
Prkag2	0.104253	0.741978	505;830;1348;1877;4291;5383	1.2159	0.63592	0.176674	0.73143	0.725069	832;1924;4338;4867;5385;5710	0.72763	0.403589	0.492216	1	0.99152
Prkag3	-0.0517043	0.731064	2455;2888;3051;3546;5005;5279	0.716663	0.451121	0.502639	0.945875	0.944038	936;1210;2669;3164;3327;3760	1.3091	0.626587	0.145134	0.811966	0.809336
Prkca	0.0227721	0.552229	1399;1458;3418;3782;3864;4847	0.675823	0.473391	0.543996	0.956325	0.956087	1368;2351;2433;2797;4757;4816	0.730076	0.472442	0.489687	1	0.99152
Prkcb	0.112924	0.830044	27;1101;1138;4408;4606;4947	1.59331	0.711494	0.0789662	0.499115	0.496604	1268;1609;1807;5077;5114;6188	0.755894	0.391383	0.464829	1	0.99152
Prkcd	-0.0119891	0.685287	2278;2286;3497;3798;4309;4640	0.76112	0.493647	0.459541	0.936039	0.935872	1575;1906;2417;2718;3929;3937	1.18924	0.58736	0.187069	0.870185	0.870185
Prkdc	0.0188251	0.504958	1201;1455;2099;3406;4996;5192	0.650051	0.432906	0.57044	0.964911	0.960405	1023;1219;2809;4116;4760;5014	0.617987	0.429192	0.603955	1	0.99152
Prm1	-0.0171495	0.666762	2302;2730;2761;3186;4546;5144	0.657977	0.47084	0.562261	0.964875	0.960405	1071;1669;3029;3454;3485;3913	1.20517	0.571503	0.180883	0.863233	0.863233
Prm2	0.0736095	0.640772	918;1577;2797;3149;3675;4179	1.03379	0.549244	0.260976	0.809318	0.80898	2036;2540;3066;3418;4638;5297	0.568456	0.430376	0.655708	1	0.99152
Prm3	0.0788559	0.826212	1695;2421;2502;2940;2941;3340	1.61775	0.708059	0.0746486	0.484776	0.481984	2875;3274;3275;3713;3794;4520	0.905356	0.59087	0.341187	0.977519	0.977123
Prmt1	-0.312174	1.47501	824;3630;5473;5621;5685;6180	1.63507	0.628066	0.0719022	0.49	0.481984	35;530;594;742;2585;5391	2.62623	1.26363	0.00797343	0.16505	0.163481
Prmt2	-0.0595098	0.651492	1730;2073;3212;4275;5123;5578	0.506639	0.376869	0.71262	0.989185	0.960405	637;1092;1940;3003;4142;4485	0.849653	0.55844	0.382871	1	0.99152
Prmt3	0.215241	1.3899	284;307;548;994;2340;5215	2.15925	1.19067	0.0230543	0.28491	0.28491	1000;3875;5221;5667;5908;5931	1.31509	0.642592	0.143215	0.812205	0.809336
Prmt5	0.17995	1.0588	65;1255;1630;1896;2013;4860	1.8395	0.907349	0.0464155	0.415481	0.409426	1355;4202;4319;4585;4960;6150	1.12271	0.458374	0.215926	0.90069	0.897879
Prmt6	0.0597358	0.666969	384;887;1663;2397;3507;5978	0.90202	0.571683	0.34355	0.868577	0.868577	237;2708;3818;4552;5328;5831	0.724912	0.41677	0.494758	1	0.99152
Prmt7	0.281582	1.89724	387;561;681;890;1480;1812	3.21128	1.62515	0.00185507	0.0787692	0.0787692	4403;4735;5325;5534;5654;5828	2.04874	0.94601	0.0293816	0.365835	0.365835
Prmt8	0.0238261	0.516575	1229;1889;2225;3877;4335;4979	0.614615	0.442851	0.607477	0.971963	0.960405	1236;1880;2338;3990;4326;4986	0.587513	0.437985	0.635947	1	0.99152
Prmt9	0.127697	0.848947	670;748;807;2900;3083;5139	1.53971	0.72751	0.0884952	0.514204	0.514204	1076;3132;3315;5408;5467;5545	0.839319	0.442944	0.391074	1	0.99152
Prpf31	0.24593	1.48016	289;300;1014;1614;1618;3259	2.2748	1.2681	0.0176184	0.280538	0.267292	2956;4597;4601;5201;5915;5926	1.42435	0.67108	0.113371	0.757024	0.751708
Prr14	-0.0630256	0.617835	1203;1495;2886;4767;4883;5881	0.550219	0.365944	0.674176	0.990626	0.960405	334;1332;1448;3329;4720;5012	0.94243	0.529625	0.316072	0.960396	0.958011
Psip1	0.188518	1.14222	106;474;626;1412;4083;4977	1.82771	0.978698	0.0474891	0.413905	0.409426	1238;2132;4803;5589;5741;6109	1.00304	0.487689	0.278395	0.937037	0.928944
Ptpn2	-0.0303207	0.735481	160;3178;4614;4696;4711;5030	0.867744	0.55686	0.368907	0.885377	0.880799	1185;1504;1519;1601;3037;6055	1.4386	0.630301	0.109754	0.747951	0.747951
Pwwp3a	0.128726	0.803663	314;1200;2155;3294;3355;3559	1.45226	0.688808	0.10656	0.567408	0.567408	2656;2860;2921;4060;5015;5901	0.801818	0.414416	0.422507	1	0.99152
Pygo1	-0.0399815	0.57092	468;1560;3726;4551;4631;5833	0.557918	0.389789	0.666467	0.992509	0.960405	382;1584;1664;2489;4655;5747	0.857784	0.489418	0.376694	1	0.99152
Pygo2	0.174337	1.01654	465;649;1515;1574;3486;3626	1.46308	0.871104	0.104114	0.567145	0.566518	2589;2729;4641;4700;5566;5750	0.869177	0.480771	0.367786	1	0.99152
Rad51	0.247544	1.5596	19;132;232;1742;4122;5203	3.03219	1.33568	0.00282488	0.101696	0.101696	1012;2093;4473;5983;6083;6196	1.74924	0.623521	0.0562101	0.547553	0.544231
Rad54b	0.129434	0.906361	795;1973;2034;2386;2845;3140	1.77865	0.776723	0.0527717	0.430493	0.430493	3075;3370;3829;4181;4242;5420	1.01027	0.527028	0.2741	0.937831	0.928944
Rad54l	0.0611232	0.577054	266;2109;2525;3303;3860;5158	0.68534	0.494693	0.534269	0.955454	0.955032	1057;2355;2912;3690;4106;5949	0.591111	0.37387	0.632114	1	0.99152
Rad54l2	0.192536	1.07093	100;246;1330;2649;3825;3959	1.69895	0.917689	0.0629553	0.46542	0.465316	2256;2390;3566;4885;5969;6115	0.713402	0.429915	0.505802	1	0.99152
Rag1	-0.164394	0.882384	2200;3002;3388;4292;5182;6117	0.621767	0.38039	0.59985	0.978672	0.960405	98;1033;1923;2827;3213;4015	1.13811	0.756279	0.208925	0.891701	0.890663
Rag2	0.148453	0.996051	585;801;840;1175;4454;4605	1.8993	0.853473	0.0408176	0.386251	0.385034	1610;1761;5040;5375;5414;5630	1.1429	0.512022	0.206699	0.898409	0.890663
Rai1	-0.0800038	0.87939	2793;2930;3961;4567;4854;4933	0.86524	0.512765	0.370864	0.882399	0.880799	1282;1361;1648;2254;3285;3422	1.55455	0.753618	0.0856461	0.662757	0.662757
Rara	0.0997441	0.690444	459;1414;2166;2187;3311;5130	1.01478	0.591792	0.2717	0.819556	0.813595	1085;2904;4028;4049;4801;5756	0.624979	0.386986	0.596498	1	0.99152
Rb1	0.152035	0.926397	765;883;1481;2565;2651;3778	1.31321	0.793891	0.143739	0.670513	0.669725	2437;3564;3650;4734;5332;5450	0.787277	0.475576	0.435321	1	0.99152
Rbbp4	-0.0279373	0.560879	968;1030;3304;4311;5109;5618	0.699802	0.393425	0.519417	0.947306	0.947306	597;1106;1904;2911;5185;5247	0.716765	0.480828	0.50247	1	0.99152
Rbbp5	0.195534	1.10388	116;703;971;2114;2274;4741	1.60263	0.945938	0.0771425	0.489456	0.489456	1474;3941;4101;5244;5512;6099	0.966526	0.465265	0.300745	0.946833	0.946833
Rbbp7	0.0809891	0.639704	507;610;2732;3330;3611;5235	1.01948	0.548335	0.269149	0.820829	0.813595	980;2604;2885;3483;5605;5708	0.543679	0.378701	0.680572	1	0.99152
Rbx1	-0.342644	1.74246	1939;4988;5437;5533;5575;6169	1.83432	0.766612	0.0468998	0.413117	0.409426	46;640;682;778;1227;4276	2.84001	1.49265	0.00479469	0.120303	0.120303
Rbx1-ps	-0.519068	1.77306	4988;5575;6169	1.02809	0.410639	0.264145	0.810044	0.810044	46;640;1227	2.11358	1.3295	0.0255531	0.346852	0.346484
Rcc1	-0.0885618	0.894602	2424;3466;4293;4382;4470;5351	0.748412	0.504757	0.4719	0.938134	0.938065	864;1745;1833;1922;2749;3791	1.2877	0.766642	0.151697	0.818274	0.813936
Rcor1	0.260289	1.5807	184;214;1287;1376;1633;3016	2.25619	1.35418	0.0182391	0.267292	0.267292	3199;4582;4839;4928;6001;6031	1.41115	0.702462	0.116591	0.757153	0.751708
Rcor3	-0.0289558	0.566998	1213;2078;3287;3977;4521;5605	0.50953	0.37537	0.710184	0.991622	0.960405	610;1694;2238;2928;4137;5002	0.684517	0.486055	0.535088	1	0.99152
Rest	0.0319474	0.520304	575;2017;2300;2808;4952;5241	0.726059	0.446062	0.493622	0.943924	0.943924	974;1263;3407;3915;4198;5640	0.602558	0.403119	0.62015	1	0.99152
Ring1	0.274839	1.79045	196;591;1016;1293;1453;1708	3.3653	1.53381	0.0012814	0.0624118	0.0624118	4507;4762;4922;5199;5624;6019	2.16702	0.864043	0.0226824	0.313017	0.313017
Riox2	0.118688	0.737636	461;718;1685;3181;3955;4347	0.93109	0.632236	0.323407	0.85553	0.85553	1868;2260;3034;4530;5497;5754	0.520251	0.378184	0.701719	1	0.99152
Rlim	0.0274636	0.531507	443;2032;2145;3203;3628;5832	0.771111	0.455649	0.449975	0.933782	0.931354	383;2587;3012;4070;4183;5772	0.570162	0.405627	0.653878	1	0.99152
Rmi1	0.0296029	0.625524	943;1089;1691;1885;4185;5983	1.21012	0.536148	0.179	0.730108	0.728797	232;2030;4330;4524;5126;5272	0.732356	0.467261	0.487582	1	0.99152
Rnf168	0.201528	1.24392	47;213;834;1837;2744;5564	1.81448	1.06579	0.0490833	0.412599	0.412599	651;3471;4378;5381;6002;6168	0.819394	0.505577	0.40758	1	0.99152
Rnf2	0.0500659	0.593989	760;2518;2707;3395;3627;4613	0.776327	0.509166	0.445072	0.934144	0.931354	1602;2588;2820;3508;3697;5455	0.741946	0.445061	0.478133	1	0.99152
Rnf20	0.144136	0.877672	95;846;1009;3865;4099;4235	1.29826	0.75223	0.148303	0.682194	0.679681	1980;2116;2350;5206;5369;6120	0.711199	0.396575	0.507995	1	0.99152
Rnf40	0.0897809	0.833358	1880;2025;2251;2599;2791;3691	1.35736	0.714178	0.130915	0.641408	0.641408	2524;3424;3616;3964;4190;4335	0.938293	0.572632	0.318825	0.959953	0.958011
Rnf8	-0.461435	1.96081	315;4544;5173;5945;6106;6207	1.62802	0.846388	0.07293	0.486984	0.481984	8;109;270;1042;1671;5900	2.84287	1.67924	0.00477778	0.121723	0.120303
Rps6ka3	0.0428035	0.547243	539;1142;2844;3292;3491;5699	0.832279	0.469131	0.396856	0.896581	0.896581	516;2724;2923;3371;5073;5676	0.565548	0.39185	0.658582	1	0.99152
Rps6ka4	0.200411	1.21293	304;1131;1279;1280;1900;3921	1.95343	1.03927	0.0361171	0.360301	0.359904	2294;4315;4935;4936;5084;5911	1.20007	0.577094	0.182994	0.868304	0.867482
Rps6ka5	-0.069381	0.718685	2185;2319;2351;4818;4826;5688	0.616638	0.415418	0.605357	0.971388	0.960405	527;1389;1397;3864;3896;4030	1.1284	0.615998	0.213389	0.896883	0.896223
Rrp8	0.123546	0.781634	605;1388;1424;2433;3225;4463	0.963902	0.669898	0.302291	0.841334	0.838811	1752;2990;3782;4791;4827;5610	0.599214	0.414619	0.623713	1	0.99152
Rsf1	0.134845	0.79243	275;658;1967;3011;3695;4206	1.01701	0.679188	0.270367	0.818516	0.813595	2009;2520;3204;4248;5557;5940	0.560266	0.374298	0.664065	1	0.99152
Ruvbl1	-0.168849	1.02402	1731;2899;4495;5428;5429;5886	0.854732	0.466924	0.378981	0.888941	0.883194	329;786;787;1720;3316;4484	1.56759	0.877481	0.0832415	0.679054	0.662757
Ruvbl2	-0.176031	0.937787	991;3172;4519;4669;5562;6066	0.806561	0.412238	0.418332	0.912725	0.912725	149;653;1546;1696;3043;5224	1.35654	0.803676	0.131135	0.781151	0.77775
Rybp	0.15521	0.893021	310;439;1673;2180;3876;4296	1.253	0.765319	0.163356	0.704474	0.70426	1919;2339;4035;4542;5776;5905	0.626895	0.404017	0.594528	1	0.99152
Rybp-ps	0.149221	0.657571	439;2180;3876	0.737424	0.493183	0.482446	0.944362	0.943265	2339;4035;5776	0.357419	0.201425	0.771093	1	0.99152
Safb	-0.0353454	0.599122	1310;2052;3351;4084;5102;5276	0.51321	0.387791	0.707295	0.994295	0.960405	939;1113;2131;2864;4163;4905	0.706155	0.513565	0.513178	1	0.99152
Sap130	-0.0524506	0.692725	1664;2907;3457;4355;4759;5242	0.579509	0.419524	0.644267	0.98605	0.960405	973;1456;1860;2758;3308;4551	0.920953	0.593736	0.330155	0.96939	0.967823
Sap18	-0.236011	1.25834	756;1387;4819;5863;6004;6028	1.42104	0.604021	0.114058	0.593962	0.59237	187;211;352;1396;4828;5459	2.51543	1.07788	0.0103684	0.195114	0.195114
Sap18b	-0.246395	1.26533	756;1387;5863;6004;6028	1.57188	0.590446	0.0825048	0.502309	0.50148	187;211;352;4828;5459	2.79114	1.05372	0.00536232	0.123333	0.123333
Sap25	-0.00291968	0.648741	1652;2519;3619;3906;4050;4616	0.774633	0.485063	0.446659	0.931572	0.931354	1599;2165;2309;2596;3696;4563	0.80998	0.556047	0.415306	1	0.99152
Sap30	0.0615978	0.580683	210;853;2735;3578;4474;5387	0.805255	0.497821	0.419553	0.914184	0.914184	828;1741;2637;3480;5362;6005	0.544222	0.354506	0.679996	1	0.99152
Sap30l	0.0151502	0.555614	1043;2535;2700;4033;4342;4634	0.764491	0.458144	0.456337	0.932956	0.932956	1581;1873;2182;3515;3680;5172	0.749031	0.476277	0.471379	1	0.99152
Satb1	0.0469551	0.598489	1240;2143;2259;3743;3882;4362	0.922114	0.513017	0.329388	0.865819	0.864575	1853;2333;2472;3956;4072;4975	0.602218	0.462699	0.620564	1	0.99152
Satb2	-0.0723932	0.667274	1955;2333;2659;3297;4692;6010	0.581788	0.383012	0.641831	0.985053	0.960405	205;1523;2918;3556;3882;4260	0.98377	0.571998	0.289954	0.934171	0.934171
Scmh1	0.187031	1.05777	330;501;1738;1855;2660;3850	1.30695	0.906426	0.145749	0.672312	0.672312	2365;3555;4360;4477;5714;5885	0.783584	0.477463	0.438755	1	0.99152
Scml2	0.0506937	0.556244	715;1429;1605;3001;4239;5552	0.851952	0.476832	0.380987	0.886115	0.883194	663;1976;3214;4610;4786;5500	0.518924	0.384826	0.702773	1	0.99152
Scml4	0.0421345	0.579058	1521;1909;2082;2776;3770;5249	0.737847	0.496355	0.482059	0.944722	0.943265	966;2445;3439;4133;4306;4694	0.730969	0.452078	0.488803	1	0.99152
Senp1	-0.447264	2.66066	4909;5392;5547;5926;5981;6074	2.71303	1.32762	0.00676932	0.180806	0.178848	141;234;289;668;823;1306	4.06457	2.27832	0.000231884	0.0137143	0.0135484
Senp3	-0.314964	1.60695	3267;4405;4843;5019;6020;6092	1.26649	0.693593	0.158894	0.699809	0.699809	123;195;1196;1372;1810;2948	2.04984	1.37667	0.0293225	0.370672	0.365835
Set	-0.0695275	0.77293	1139;3623;4028;4517;4688;5332	0.81213	0.45476	0.413604	0.910809	0.909777	883;1527;1698;2187;2592;5076	1.35495	0.662415	0.131473	0.780358	0.77775
Setd1a	-0.219898	1.32781	3410;3963;4531;4905;5794;5849	1.21043	0.612965	0.178893	0.731472	0.728797	366;421;1310;1684;2252;2805	2.07263	1.13768	0.0276957	0.361134	0.361134
Setd1b	0.16073	0.936963	388;1158;1345;1875;3280;3847	1.24949	0.802955	0.164698	0.70658	0.705023	2368;2935;4340;4870;5057;5827	0.72842	0.448726	0.491384	1	0.99152
Setd2	-0.0942238	0.733063	1539;1698;2986;4770;5700;5717	0.550928	0.388313	0.673414	0.990385	0.960405	498;515;1445;3229;4517;4676	1.13733	0.628304	0.20922	0.890663	0.890663
Setd3	0.247378	1.45415	142;535;590;1600;1668;4000	2.21347	1.24583	0.0203285	0.278215	0.2764	2215;4547;4615;5625;5680;6073	1.38094	0.635578	0.124377	0.751708	0.751708
Setd4	-0.0263291	0.567569	1522;1969;2167;3938;4757;5704	0.630221	0.38586	0.590902	0.971732	0.960405	511;1458;2277;4048;4246;4693	0.731524	0.486562	0.488401	1	0.99152
Setd5	0.224337	1.25926	58;249;2087;2106;2256;3836	1.6893	1.07901	0.0640978	0.469673	0.469605	2379;3959;4109;4128;5966;6157	0.976379	0.503891	0.294421	0.94306	0.942533
Setd6	0.00186704	0.550837	1224;1762;2873;4420;4465;4931	0.602617	0.428837	0.620041	0.969583	0.960405	1284;1750;1795;3342;4453;4991	0.761032	0.472196	0.459622	1	0.99152
Setd7	-0.00839105	0.691543	1124;3492;3556;3861;4354;4392	0.904254	0.515039	0.342087	0.872875	0.868577	1823;1861;2354;2659;2723;5091	1.26389	0.592694	0.159901	0.82491	0.821636
Setdb1	-1.15407	6.23347	5614;6102;6194;6205;6206;6213	6.18019	3.2798	1.20773e-06	0.001	0.000666667	2;9;10;21;113;601	8.71146	5.29007	0	0	0
Setdb2	-0.0281967	0.556105	916;2575;2692;3948;4466;5749	0.528604	0.375372	0.694676	0.994282	0.960405	466;1749;2267;3523;3640;5299	0.765961	0.476729	0.454937	1	0.99152
Setmar	0.040348	0.567855	1514;1535;1977;3629;4101;4876	0.690002	0.486773	0.529477	0.953059	0.953059	1339;2114;2586;4238;4680;4701	0.727086	0.442364	0.492728	1	0.99152
Sf3b1	-0.00416845	0.631265	1482;2671;3591;3768;3777;4980	0.709486	0.470797	0.509761	0.945312	0.944038	1235;2438;2447;2624;3544;4733	0.808096	0.541078	0.41693	1	0.99152
Sf3b3	-0.03361	0.624114	973;2142;3671;4723;4784;5104	0.548805	0.415689	0.675598	0.99008	0.960405	1111;1431;1492;2544;4073;5242	0.915513	0.534953	0.334023	0.973842	0.971664
Sfmbt1	0.155528	1.12208	832;1242;1245;1254;1593;5087	2.30626	0.96137	0.016529	0.27101	0.267292	1128;4622;4961;4970;4973;5383	1.4467	0.615941	0.108046	0.754954	0.746523
Sfmbt2	-0.0867315	0.791434	2003;2533;2550;5199;5286;5491	0.707525	0.435417	0.511761	0.946901	0.944038	724;929;1016;3665;3682;4212	1.29101	0.678286	0.150777	0.818643	0.813936
Sfpq	0.0327015	0.523125	733;1813;2990;3229;4694;4794	0.676039	0.448477	0.543819	0.957029	0.956087	1421;1521;2986;3225;4402;5482	0.598966	0.414125	0.623921	1	0.99152
Sgf29	-0.540955	3.04165	4751;5568;5916;5956;6006;6174	2.85181	1.50005	0.00470169	0.144185	0.144185	41;209;259;299;647;1464	4.18193	2.60396	0.00018599	0.0118462	0.0118462
Shprh	0.240416	1.31925	20;1220;1561;1638;2367;3154	1.76706	1.1305	0.053965	0.433816	0.433816	3061;3848;4577;4654;4995;6195	1.00259	0.527638	0.278539	0.933725	0.928944
Sin3a	-0.0933667	0.765067	1266;2352;4232;4968;5027;5638	0.68825	0.407527	0.531262	0.954197	0.954197	577;1188;1247;1983;3863;4949	1.14196	0.655696	0.207109	0.895488	0.890663
Sin3b	-0.573119	3.07945	4799;5480;5868;6014;6016;6195	2.64379	1.48424	0.00773792	0.18571	0.183778	20;199;201;347;735;1416	3.91194	2.6364	0.000316425	0.016375	0.0153714
Sirt1	-0.0804295	0.705191	1100;2374;3020;4953;5515;5529	0.603233	0.390908	0.619364	0.969439	0.960405	686;700;1262;3195;3841;5115	1.07168	0.604414	0.240548	0.90947	0.906866
Sirt2	0.145627	0.897863	215;1440;2482;2590;3042;3313	1.6389	0.7695	0.0714698	0.491095	0.481984	2902;3173;3625;3733;4775;6000	0.918927	0.448151	0.331457	0.969774	0.969774
Sirt3	-0.0828224	0.623356	1000;1199;2111;4312;4978;6120	0.646428	0.371367	0.574197	0.968299	0.960405	95;1237;1903;4104;5016;5215	1.07095	0.534414	0.241048	0.907218	0.906866
Sirt4	0.108548	0.718391	449;691;1344;3265;3670;5141	1.01141	0.615736	0.273599	0.817834	0.813595	1074;2545;2950;4871;5524;5766	0.577512	0.374822	0.646205	1	0.99152
Sirt5	0.194019	1.22907	728;881;1472;1486;1779;3359	2.0843	1.05308	0.0271461	0.312181	0.309274	2856;4436;4729;4743;5334;5487	1.29043	0.625328	0.150943	0.816869	0.813936
Sirt6	-0.0764964	0.728035	2038;2718;3504;4307;4401;5777	0.56907	0.402813	0.655064	0.991578	0.960405	438;1814;1908;2711;3497;4177	1.03504	0.624006	0.260181	0.926581	0.920769
Sirt7	0.0719017	0.630445	892;1568;2268;2339;3339;5298	0.931472	0.540378	0.323213	0.857756	0.85553	917;2876;3876;3947;4647;5323	0.587513	0.414611	0.635947	1	0.99152
Slbp	-0.0431772	0.627487	1787;1949;2838;3077;5339;5676	0.638597	0.396647	0.582401	0.969303	0.960405	539;876;3138;3377;4266;4428	0.882982	0.537887	0.357275	0.99772	0.99152
Slf1	0.101105	0.695762	743;880;2530;2749;3772;4305	0.956389	0.596354	0.306992	0.840294	0.838811	1910;2443;3466;3685;5335;5472	0.531682	0.400437	0.691894	1	0.99152
Smarca1	0.0473917	0.687526	1276;1339;1485;2483;2790;5894	1.21952	0.589246	0.175272	0.729271	0.725069	321;3425;3732;4730;4876;4939	0.733021	0.495914	0.486905	1	0.99152
Smarca2	0.208264	1.19027	230;259;779;2461;2915;3989	1.65801	1.01984	0.0686498	0.485829	0.480017	2226;3300;3754;5436;5956;5985	0.861059	0.505346	0.373855	1	0.99152
Smarca4	-0.783332	4.22232	5673;5875;6029;6055;6109;6212	4.56228	2.12704	8.21256e-05	0.0085	0.0085	3;106;160;186;340;542	6.35623	3.6125	0	0	0
Smarca5	-0.330081	1.7002	2554;5002;5153;5388;5707;6152	1.85184	0.742969	0.0451123	0.406011	0.406011	63;508;827;1062;1213;3661	2.86372	1.45654	0.0045942	0.120762	0.120303
Smarcad1	0.0351516	0.522098	1085;1753;1961;3531;4353;5152	0.695679	0.447581	0.523777	0.953158	0.951723	1063;1862;2684;4254;4462;5130	0.529526	0.412841	0.693833	1	0.99152
Smarcal1	-0.0180622	0.499077	337;1524;2260;4199;4863;5935	0.608668	0.395359	0.613764	0.968917	0.960405	280;1352;2016;3955;4691;5878	0.676599	0.427903	0.543252	1	0.99152
Smarcb1	-0.409978	2.03746	3090;5323;5413;5417;5674;6197	2.33231	0.890346	0.0152729	0.260742	0.260742	18;541;798;802;892;3125	3.50418	1.74527	0.000910628	0.0350698	0.0350698
Smarcc1	0.0939956	0.714025	145;416;1984;3793;4107;5522	1.29284	0.612023	0.150252	0.685449	0.679681	693;2108;2422;4231;5799;6070	0.57007	0.368017	0.654045	1	0.99152
Smarcc2	0.195509	1.14541	351;531;815;1406;3656;3858	1.62827	0.981437	0.0728551	0.490439	0.481984	2357;2559;4809;5400;5684;5864	0.970004	0.519118	0.298417	0.946701	0.946701
Smarcd1	-0.559507	3.56168	5667;5784;5867;5998;6039;6100	4.53879	1.8976	8.81643e-05	0.00858824	0.00858824	115;176;217;348;431;548	6.32754	3.04812	0	0	0
Smarcd2	0.0663371	0.59258	334;1181;2705;3910;4349;4615	0.775197	0.508004	0.446138	0.932833	0.931354	1600;1866;2305;3510;5034;5881	0.594988	0.374965	0.628106	1	0.99152
Smarcd3	0.0600457	0.582599	910;924;2521;3368;4444;4708	0.75897	0.499421	0.461725	0.935882	0.935882	1507;1771;2847;3694;5291;5305	0.514306	0.396313	0.706442	1	0.99152
Smarce1	-0.339862	2.00601	3771;5245;5467;5551;5572;6072	2.19935	0.96567	0.0208635	0.2764	0.2764	143;643;664;748;970;2444	3.32855	1.71823	0.00139614	0.0481667	0.0481667
Smarce1-ps1	-0.726734	1.63804	6072	0.0100395	0.00501974	0.990754	0.994959	0.994547	143	1.63804	0.819018	0.0716208	0.627534	0.619109
Smc1a	0.134962	0.929337	10;722;1001;3115;4133;5907	2.01872	0.79655	0.0315386	0.336955	0.336628	308;2082;3100;5214;5493;6205	0.715452	0.395581	0.503855	1	0.99152
Smc1b	-0.129686	1.03679	3266;3543;4234;4541;4745;5658	1.12042	0.539247	0.217112	0.77654	0.77654	557;1470;1674;1981;2672;2949	1.94218	0.888443	0.0368804	0.424125	0.424125
Smc2	-0.211652	0.947576	2026;2440;2998;4864;5460;6178	0.575494	0.369098	0.648419	0.990574	0.960405	37;755;1351;3217;3775;4189	1.45999	0.812157	0.105008	0.746326	0.746326
Smc3	-0.412937	2.16896	3511;4386;5537;5995;6051;6070	1.79209	0.997294	0.0511135	0.421114	0.421114	145;164;220;678;1829;2704	3.09878	1.85734	0.00238285	0.0704643	0.0704643
Smc4	-0.0189878	0.693962	44;1022;4645;4654;5400;5611	1.3872	0.594931	0.122807	0.612554	0.612554	604;815;1561;1570;5193;6171	1.46675	0.577913	0.103469	0.741749	0.741749
Smyd1	-0.053189	0.681132	1149;3018;3982;4068;4730;5401	0.612811	0.414716	0.60939	0.970337	0.960405	814;1485;2147;2233;3197;5066	0.988597	0.583798	0.286815	0.936817	0.932175
Smyd2	-0.0364732	0.669929	1494;2896;3548;4080;4797;4914	0.611617	0.438185	0.610521	0.968412	0.960405	1301;1418;2135;2667;3319;4721	0.915391	0.574202	0.334135	0.972457	0.971664
Smyd3	0.00210613	0.580859	225;2041;4213;4436;4595;4963	0.743122	0.49299	0.476996	0.943735	0.943265	1252;1620;1779;2002;4174;5990	1.1293	0.497882	0.213035	0.897674	0.896223
Smyd4	0.143867	0.985165	678;1769;2115;2615;2631;2668	2.20311	0.844217	0.0206643	0.278211	0.2764	3547;3584;3600;4100;4446;5537	1.3021	0.559167	0.147046	0.814408	0.811802
Smyd5	-0.0688015	0.825059	2313;3080;4136;4149;4857;4912	0.662021	0.493434	0.558169	0.96084	0.960405	1303;1358;2066;2079;3135;3902	1.2125	0.707078	0.178021	0.856983	0.856983
Snai2	-0.0669753	0.715541	2458;2545;2910;3439;4955;5765	0.717866	0.413854	0.501379	0.947813	0.944038	450;1260;2776;3305;3670;3757	1.31118	0.613316	0.144205	0.812259	0.809336
Snapc3	0.521856	1.76807	106	1.76807	0.884033	0.0538901	0.437461	0.433816	6109	0.00740112	0.00370056	0.993122	0.999156	0.998368
Snd1	0.22525	1.25458	166;490;993;1706;2563;3550	1.45886	1.075	0.105297	0.569843	0.567408	2665;3652;4509;5222;5725;6049	0.824758	0.53231	0.403182	1	0.99152
Sp1	0.073118	0.770228	75;250;2328;4014;5180;5543	1.68611	0.660146	0.064494	0.470493	0.469605	672;1035;2201;3887;5965;6140	0.707825	0.426529	0.511452	1	0.99152
Sp100	-0.0141664	0.665045	1741;2580;3496;4164;4277;4623	0.770684	0.475128	0.450459	0.933617	0.931354	1592;1938;2051;2719;3635;4474	0.856052	0.570015	0.377966	1	0.99152
Sp110	0.0307663	0.604687	417;862;1114;3983;5186;5743	1.19583	0.518346	0.184399	0.735817	0.734979	472;1029;2232;5101;5353;5798	0.70031	0.43873	0.518926	1	0.99152
Sp140	-0.202079	1.00847	2084;3128;3731;4760;5709;6101	0.636019	0.410089	0.585091	0.96891	0.960405	114;506;1455;2484;3087;4131	1.1499	0.864251	0.203748	0.892608	0.890663
Spen	-0.0438842	0.638651	540;3182;3404;3696;5399;5444	0.651819	0.416333	0.568673	0.965869	0.960405	771;816;2519;2811;3033;5675	1.07015	0.547411	0.241502	0.906866	0.906866
Spop	0.1083	0.738732	319;2059;2342;2541;3194;4361	0.980395	0.633174	0.291912	0.830595	0.82924	1854;3021;3674;3873;4156;5896	0.607039	0.411162	0.615342	1	0.99152
Srcap	0.0302786	0.656446	70;3302;3487;3762;3986;5340	1.19472	0.562743	0.185112	0.736889	0.734979	875;2229;2453;2728;2913;6145	1.14173	0.482871	0.207162	0.893385	0.890663
Srsf1	-0.281762	1.48667	2711;3369;5013;5695;5910;6023	1.13183	0.644896	0.211774	0.770765	0.770765	192;305;520;1202;2846;3504	2.04494	1.27362	0.0296087	0.36591	0.36591
Srsf3	0.202073	1.26092	601;814;1544;1613;1768;3041	2.0967	1.08037	0.0264106	0.310184	0.309274	3174;4447;4602;4671;5401;5614	1.29906	0.631056	0.148192	0.812603	0.811802
Ss18l1	-0.110249	0.995862	3222;3519;3905;4493;5077;5263	1.09414	0.541543	0.229372	0.778361	0.777777	952;1138;1722;2310;2696;2993	1.90359	0.853381	0.0405254	0.450403	0.446
Ss18l2	-0.304917	1.96903	4707;4851;5250;5353;5738;5899	2.41877	0.983673	0.0124831	0.234909	0.231489	316;477;862;965;1364;1508	3.68982	1.68662	0.00061715	0.0268947	0.0264615
Ssrp1	-0.0791278	0.662977	1597;2370;3251;3888;4747;5970	0.507952	0.355768	0.711473	0.990084	0.960405	245;1468;2327;2964;3845;4618	0.773504	0.568304	0.447744	1	0.99152
Stk31	0.0948349	0.677126	377;1294;1529;3120;3187;5348	0.984154	0.580393	0.289646	0.82699	0.82699	867;3028;3095;4686;4921;5838	0.608841	0.374722	0.613516	1	0.99152
Stk4	0.0902059	0.657934	729;841;1764;3594;3635;4856	0.813677	0.563949	0.412418	0.910619	0.909777	1359;2580;2621;4451;5374;5486	0.537425	0.386214	0.686565	1	0.99152
Suds3	-0.358084	1.85813	3873;4410;5419;5424;5705;6164	1.55634	0.820058	0.0853394	0.512036	0.512036	51;510;791;796;1805;2342	2.54271	1.5918	0.00937319	0.182612	0.182612
Supt16	0.0364615	0.579407	204;927;1611;3866;4625;5880	0.848788	0.496722	0.383591	0.883485	0.883485	335;1590;2349;4604;5288;6011	0.610514	0.388626	0.611855	1	0.99152
Supt3	-0.0262237	0.527177	286;1581;1789;3500;4317;6122	0.763627	0.436461	0.457223	0.933615	0.933615	93;1898;2715;4426;4634;5929	1.07948	0.452013	0.236866	0.916472	0.906866
Supt6	0.0161247	0.513912	484;1435;3738;3742;4812;5060	0.560028	0.440603	0.664342	0.99202	0.960405	1155;1403;2473;2477;4780;5731	0.863386	0.431919	0.372158	1	0.99152
Supt7l	-0.107294	0.895455	2646;2867;4009;4788;5081;5438	0.797362	0.469837	0.426414	0.923061	0.922235	777;1134;1427;2206;3348;3569	1.44495	0.76739	0.108413	0.754336	0.746523
Supv3l1	-0.181587	1.15125	2529;2684;5159;5191;5341;5859	1.25174	0.541967	0.163732	0.70426	0.70426	356;874;1024;1056;3531;3686	2.06452	0.986429	0.0281051	0.363609	0.363609
Suv39h1	-0.0647753	0.832296	2336;3239;3908;4433;4655;4841	0.670564	0.504422	0.5493	0.959536	0.958949	1374;1560;1782;2307;2976;3879	1.22791	0.713275	0.172249	0.836493	0.836493
Suv39h2	0.0224317	0.549143	1350;1746;2868;4123;4131;4589	0.789919	0.469265	0.433001	0.92762	0.926543	1626;2084;2092;3347;4469;4865	0.652188	0.470741	0.56826	1	0.99152
Suz12	-0.0611677	0.901909	2644;3432;4008;4423;4471;4522	0.828244	0.566252	0.400037	0.898863	0.898463	1693;1744;1792;2207;2783;3571	1.44349	0.772893	0.10864	0.749617	0.746523
Syncrip	0.135313	0.893844	645;1523;1752;1786;2272;4721	1.60432	0.765978	0.0768792	0.491552	0.489456	1494;3943;4429;4463;4692;5570	0.967614	0.485431	0.300035	0.950015	0.946833
Tada1	-0.101666	0.869303	2884;3064;3260;4646;4902;5601	0.90986	0.463504	0.33806	0.869298	0.868233	614;1313;1569;2955;3151;3331	1.62478	0.745002	0.073692	0.629041	0.629041
Tada2a	-0.0151499	0.683096	2250;2870;3088;3205;4348;4974	0.639225	0.488489	0.581665	0.969052	0.960405	1241;1867;3010;3127;3345;3965	1.17077	0.585487	0.194946	0.879646	0.878304
Tada2b	0.0646382	0.657547	500;565;2110;2126;4997;5594	1.07215	0.563611	0.240399	0.793028	0.792287	621;1218;4089;4105;5650;5715	0.642269	0.411828	0.578601	1	0.99152
Tada3	-0.208324	1.24205	1074;4058;5214;5297;5606;5947	1.30768	0.581355	0.145463	0.674751	0.672312	268;609;918;1001;2157;5141	2.14822	1.06415	0.0235495	0.322298	0.322298
Taf1	-0.148746	0.801634	1489;2432;2856;4779;5504;6087	0.553084	0.355213	0.671376	0.990907	0.960405	128;711;1436;3359;3783;4726	0.953207	0.687094	0.30913	0.955075	0.954793
Taf10	-0.273141	1.34745	1378;4618;4731;5020;5813;6134	1.4431	0.571774	0.108831	0.575796	0.575796	81;402;1195;1484;1597;4837	2.30119	1.1545	0.016663	0.260321	0.260321
Taf12	-0.130193	0.834922	370;2315;2463;5426;5844;5987	0.853165	0.452053	0.380178	0.887975	0.883194	228;371;789;3752;3900;5845	1.56477	0.715498	0.083715	0.676254	0.662757
Taf2	-0.433734	2.74859	5145;5499;5744;5798;5842;6054	3.1258	1.41671	0.00226691	0.0873023	0.0873023	161;373;417;471;716;1070	4.58392	2.35348	7.72947e-05	0.00609524	0.00609524
Taf3	-0.155952	1.01795	2376;2654;4725;4746;5656;5716	0.917308	0.481356	0.332746	0.866396	0.864575	499;559;1469;1490;3561;3839	1.54277	0.872296	0.0879046	0.67707	0.67707
Taf4	-0.126872	1.10307	3582;3933;3942;4566;4866;5415	1.32652	0.596967	0.139647	0.662625	0.659259	800;1349;1649;2273;2282;2633	2.23752	0.945189	0.019401	0.286857	0.286857
Taf5	-0.0292499	0.553574	634;2614;2894;3371;5126;5712	0.565548	0.380574	0.658582	0.989666	0.960405	503;1089;2844;3321;3601;5581	0.782821	0.474559	0.439417	1	0.99152
Taf5l	-0.26947	1.32012	1467;4081;4710;5008;6042;6053	1.04664	0.560059	0.253766	0.801977	0.801977	162;173;1207;1505;2134;4748	1.98361	1.13097	0.0337923	0.405507	0.405266
Taf6	0.000388313	0.648358	1037;2748;3916;4051;4105;4406	0.895961	0.501498	0.347827	0.875383	0.874953	1809;2110;2164;2299;3467;5178	0.952517	0.555704	0.309616	0.954793	0.954793
Taf6l	-0.380918	1.87426	3286;4308;5227;5668;6050;6138	1.32149	0.805098	0.141303	0.664767	0.664153	77;165;547;988;1907;2929	2.16877	1.60546	0.0226316	0.314941	0.313017
Taf7	-0.588392	2.93101	5223;5265;5300;5955;6058;6208	3.28379	1.35106	0.00158092	0.0688947	0.0688947	7;157;260;915;950;992	4.78116	2.50987	5.43478e-05	0.0045	0.0045
Taf8	-0.477576	3.0705	5540;5587;5746;5856;5924;6080	4.09527	1.61224	0.000222222	0.0184	0.0184	135;291;359;469;628;675	5.7844	2.62865	3.62319e-06	0.0004	0.0004
Taf9	-0.0898933	0.628471	292;1727;3541;3988;5244;6112	0.654351	0.373298	0.566011	0.965308	0.960405	103;971;2227;2674;4488;5923	1.03868	0.538769	0.258348	0.926026	0.920769
Taf9b	-0.0987276	0.915997	2970;3499;3657;4127;5061;5407	0.953916	0.500832	0.308476	0.838811	0.838811	808;1154;2088;2558;2716;3245	1.69294	0.784985	0.0636389	0.595401	0.593654
Tasor	-0.970856	5.68219	5766;6123;6168;6181;6199;6201	6.17404	3.06744	1.20773e-06	0.000666667	0.000666667	14;16;34;47;92;449	8.37624	4.84447	0	0	0
Tbl1xr1	0.336205	2.31692	146;183;248;343;1842;2695	3.90554	1.98376	0.000318841	0.024	0.0237391	3520;4373;5872;5967;6032;6069	2.55076	1.09337	0.00924155	0.18219	0.18219
Tbp	0.0491295	0.616314	831;962;1277;4339;4739;4992	1.06024	0.528297	0.246551	0.797438	0.795743	1223;1476;1876;4938;5253;5384	0.72763	0.434867	0.492216	1	0.99152
Tdg	0.127117	0.785286	602;911;1518;2371;3979;4172	1.03816	0.673037	0.25855	0.806324	0.806324	2043;2236;3844;4697;5304;5613	0.580602	0.405386	0.643041	1	0.99152
Tdrd1	-0.0349857	0.739478	2348;3044;3431;3815;4345;4929	0.675069	0.489966	0.544793	0.95671	0.956087	1286;1870;2400;2784;3171;3867	1.23598	0.633778	0.169319	0.832024	0.83003
Tdrd12	0.175007	0.957014	30;854;1155;2741;3898;4545	1.54861	0.820239	0.0869118	0.515864	0.514204	1670;2317;3474;5060;5361;6185	0.643123	0.363885	0.577647	1	0.99152
Tdrd3	0.171764	0.990313	265;632;2131;2605;2608;3537	1.46842	0.848675	0.103157	0.567535	0.565801	2678;3607;3610;4084;5583;5950	0.811704	0.457229	0.413827	1	0.99152
Tdrd5	-0.0128421	0.562916	905;2542;3271;4066;4518;5212	0.514174	0.40612	0.706481	0.996535	0.960405	1003;1697;2149;2944;3673;5310	0.751967	0.482538	0.468562	1	0.99152
Tdrd6	0.0683463	0.638931	966;1869;2331;2756;2922;5175	1.13622	0.547644	0.209646	0.771498	0.77	1040;3293;3459;3884;4346;5249	0.686827	0.436721	0.53275	1	0.99152
Tdrd7	0.0923101	0.744625	988;1093;1886;2346;2493;5492	1.42781	0.638166	0.112321	0.58862	0.58862	723;3722;3869;4329;5122;5227	0.856391	0.457482	0.37749	1	0.99152
Tdrd9	0.132214	0.904425	828;1550;1883;2864;2878;3003	1.8949	0.775069	0.041221	0.385661	0.385034	3212;3337;3351;4332;4665;5387	1.08825	0.515882	0.232198	0.904753	0.904753
Tdrkh	0.0308963	0.523635	325;1980;2666;4049;4658;4985	0.619985	0.448941	0.601796	0.977033	0.960405	1230;1557;2166;3549;4235;5890	0.630501	0.397876	0.590661	1	0.99152
Tet1	0.0562368	0.658715	1361;2172;2817;3250;3320;4192	1.0257	0.564597	0.26555	0.812847	0.812085	2023;2895;2965;3398;4043;4854	0.643629	0.494954	0.576989	1	0.99152
Tet2	0.0773806	0.672807	1104;1284;1517;2757;3095;5405	1.03476	0.576657	0.260539	0.809478	0.80898	810;3120;3458;4698;4931;5111	0.633746	0.4313	0.587339	1	0.99152
Tet3	-0.00352463	0.59957	1750;2476;2613;3946;3960;5229	0.640646	0.444798	0.580199	0.967583	0.960405	986;2255;2269;3602;3739;4465	0.861299	0.513945	0.373772	1	0.99152
Tex10	0.0519047	0.599093	179;876;1661;3649;4877;5702	0.825837	0.513594	0.402267	0.900208	0.900208	513;1338;2566;4554;5339;6036	0.578969	0.372184	0.644795	1	0.99152
Tfdp1	0.0603033	0.634201	421;466;1635;3664;4778;5597	1.2093	0.543618	0.179236	0.729273	0.728797	618;1437;2551;4580;5749;5794	0.552602	0.395006	0.671872	1	0.99152
Tfpt	-0.254609	1.69331	2914;5148;5181;5549;5635;5643	2.04983	0.846605	0.0293357	0.317516	0.317516	572;580;666;1034;1067;3301	3.1297	1.45048	0.00225121	0.0677818	0.0677818
Tle1	0.180014	1.04156	119;238;1186;2318;3235;5116	1.72534	0.892497	0.0591606	0.451475	0.450284	1099;2980;3897;5029;5977;6096	0.724912	0.427352	0.494758	1	0.99152
Tle2	-0.134815	1.1357	3220;4077;4462;4636;4986;5266	1.09296	0.610859	0.22982	0.778286	0.777777	949;1229;1579;1753;2138;2995	1.90185	0.973127	0.0406679	0.446	0.446
Tle4	0.00436082	0.537281	1461;1797;2616;3874;3929;5489	0.65178	0.419047	0.568738	0.96499	0.960405	726;2286;2341;3599;4418;4754	0.697872	0.4606	0.521426	1	0.99152
Tlk1	0.0542161	0.622774	1543;1653;2596;3200;3319;4719	0.915391	0.533808	0.334135	0.864575	0.864575	1496;2896;3015;3619;4562;4672	0.74321	0.464956	0.476793	1	0.99152
Tlk2	-0.0947135	0.853251	1087;3680;4163;4950;5092;5290	0.837214	0.474026	0.392779	0.891016	0.891016	925;1123;1265;2052;2535;5128	1.39646	0.731203	0.120536	0.761863	0.751708
Tnp1	0.0572288	0.621865	1323;1863;2632;2637;4109;4383	0.909599	0.533035	0.33817	0.868233	0.868233	1832;2106;3578;3583;4352;4892	0.623309	0.456828	0.598256	1	0.99152
Tnp2	0.239972	1.50988	253;308;518;1048;1872;4712	2.07638	1.29342	0.0275386	0.310231	0.310231	1503;4343;5167;5697;5907;5962	1.25964	0.685715	0.161211	0.823969	0.821636
Tonsl	0.011978	0.503649	792;798;2246;4125;4535;5758	0.845416	0.431789	0.386143	0.888128	0.885857	457;1680;2090;3969;5417;5423	0.652803	0.419309	0.567676	1	0.99152
Top2a	0.156366	1.22109	148;175;239;3826;4867;5050	2.99499	1.04578	0.00356159	0.120367	0.120367	1165;1348;2389;5976;6040;6067	1.72534	0.596645	0.0591606	0.563046	0.563046
Top2b	-0.0942505	0.683659	537;1430;4087;4250;5534;5994	0.641681	0.384298	0.579161	0.969757	0.960405	221;681;1965;2128;4785;5678	1.04965	0.586008	0.252339	0.92655	0.920769
Trim16	0.00493395	0.525	769;1076;3684;3852;4925;5210	0.677335	0.429742	0.542443	0.956641	0.955902	1005;1290;2363;2531;5139;5446	0.838564	0.450073	0.391711	1	0.99152
Trim24	-0.280576	1.73876	3917;4443;5113;5649;5764;5826	1.58332	0.836062	0.0804589	0.500902	0.497007	389;451;566;1102;1772;2298	2.59213	1.48949	0.00850242	0.171707	0.171707
Trim27	0.0497409	0.555071	732;2096;2477;3322;4007;4814	0.665191	0.475834	0.554851	0.960119	0.958949	1401;2208;2893;3738;4119;5483	0.586933	0.405618	0.636512	1	0.99152
Trim28	0.276201	1.6223	51;412;630;932;2387;3478	2.26088	1.38986	0.0180966	0.274936	0.267292	2737;3828;5283;5585;5803;6164	1.38371	0.671394	0.123699	0.758689	0.751708
Trim33	-0.38154	2.45385	5099;5174;5648;5659;5762;6019	3.03822	1.25191	0.0027971	0.102933	0.101696	196;453;556;567;1041;1116	4.47424	2.10143	9.90338e-05	0.00713043	0.00713043
Trim66	0.0918992	0.783498	81;1077;1126;2345;3892;5957	1.18494	0.671545	0.188807	0.739158	0.738255	258;2323;3870;5089;5138;6134	0.695683	0.408432	0.52368	1	0.99152
Trrap	0.0544454	0.607232	441;477;2821;3046;4294;5706	1.19236	0.520511	0.185964	0.734979	0.734979	509;1921;3169;3394;5738;5774	0.560791	0.392659	0.663501	1	0.99152
Tspyl2	0.153314	0.945657	66;663;721;2913;4557;4813	1.66596	0.810432	0.0673104	0.480457	0.480017	1402;1658;3302;5494;5552;6149	0.909917	0.402988	0.338011	0.975167	0.974885
Tssk6	0.0796849	0.608417	444;901;2638;3175;3824;5108	0.773327	0.521548	0.447966	0.933122	0.931354	1107;2391;3040;3577;5314;5771	0.52784	0.360215	0.69535	1	0.99152
Ttk	-0.0270214	0.679061	222;754;4627;4660;5375;5451	0.880623	0.537934	0.358984	0.882015	0.880799	764;840;1555;1588;5461;5993	1.45032	0.582017	0.106975	0.750636	0.746523
Tyw5	-0.020794	0.535404	1082;1818;2746;3183;4251;5938	0.609618	0.383814	0.61267	0.969037	0.960405	277;1964;3032;3469;4397;5133	0.671761	0.45902	0.548104	1	0.99152
Uba2	-0.280733	1.22041	1721;3575;3677;4821;6063;6154	0.889661	0.471975	0.352524	0.876547	0.875487	61;152;1394;2538;2640;4494	2.08999	1.04562	0.0268092	0.355168	0.355168
Ube2a	0.0221986	0.757366	118;3690;4134;4176;4181;4215	1.01144	0.64918	0.273541	0.819139	0.813595	2000;2034;2039;2081;2525;6097	1.40386	0.605884	0.118548	0.763875	0.751708
Ube2b	-0.23678	1.02968	1541;3741;3839;4112;5056;6198	0.865264	0.397117	0.370806	0.883531	0.880799	17;1159;2103;2376;2474;4674	1.79072	0.882498	0.0515857	0.524086	0.524086
Ube2d1	0.122912	0.783479	848;928;1599;2305;3763;4203	1.01887	0.671479	0.269355	0.819949	0.813595	2012;2452;3910;4616;5287;5367	0.59522	0.422931	0.627896	1	0.99152
Ube2d3	-0.14944	0.971654	2170;2830;3928;5325;5501;5757	0.781054	0.454391	0.44101	0.93152	0.931354	458;714;890;2287;3385;4045	1.43231	0.832646	0.111395	0.749878	0.749878
Ube2e1	-0.0907918	0.985046	3342;3529;3879;4412;4617;5064	1.16715	0.573243	0.196204	0.74351	0.742155	1151;1598;1803;2336;2686;2873	2.01021	0.844106	0.0320568	0.387489	0.387489
Ube2h	-0.355555	1.72666	3111;4683;5091;5232;5890;6171	1.50319	0.726485	0.0956824	0.544502	0.544502	44;325;983;1124;1532;3104	2.38535	1.47927	0.0138043	0.23567	0.233653
Ube2i	-0.0407369	0.643824	234;613;3156;5146;5359;5895	1.01615	0.496302	0.271002	0.818942	0.813595	320;856;1069;3059;5602;5981	1.23811	0.551882	0.168405	0.829994	0.829994
Ube2n	0.00905594	0.534067	688;1169;2146;4852;5003;5095	0.637063	0.456843	0.583907	0.968888	0.960405	1120;1212;1363;4069;5046;5527	0.998216	0.457836	0.281287	0.933491	0.928944
Ube2t	-0.0280798	0.520214	479;2066;2202;3674;4922;5967	0.620663	0.377424	0.601077	0.977784	0.960405	248;1293;2541;4013;4149;5736	0.709208	0.446012	0.510085	1	0.99152
Ubn1	-0.149724	0.864153	716;2123;4552;4838;5681;6015	0.822698	0.409719	0.404769	0.903367	0.903367	200;534;1377;1663;4092;5499	1.38435	0.740584	0.123591	0.76084	0.751708
Ubr2	-0.200228	1.24565	778;4761;4926;4994;5698;5904	1.57968	0.61259	0.0810338	0.497007	0.497007	311;517;1221;1289;1454;5437	2.49165	1.06722	0.0108829	0.200244	0.200244
Ubr5	0.125103	0.853031	494;2157;2265;2306;2544;3937	1.38982	0.731052	0.12197	0.613927	0.612554	2278;3671;3909;3950;4058;5721	0.833182	0.483954	0.396209	1	0.99152
Ubr7	0.122871	0.747983	340;1026;1607;2537;4055;4424	0.885337	0.641105	0.355522	0.877413	0.877413	1791;2160;3678;4608;5189;5875	0.549915	0.370673	0.674436	1	0.99152
Uchl5	-0.649732	4.10961	5891;5903;5906;6076;6085;6144	5.66587	2.22373	6.03865e-06	0.00142857	0.00142857	71;130;139;309;312;324	7.69696	3.51529	0	0	0
Uhrf1	-0.211972	1.1787	742;3981;5004;5100;5782;6018	1.11289	0.543176	0.220569	0.780474	0.777777	197;433;1115;1211;2234;5473	1.8531	1.00993	0.0450399	0.4812	0.4812
Uhrf2	0.0373249	0.522951	872;1141;1931;3263;4413;5565	0.706606	0.448316	0.512676	0.945425	0.944038	650;1802;2952;4284;5074;5343	0.508397	0.388895	0.711087	1	0.99152
Uimc1	-0.0400683	0.691591	1996;3074;3076;3823;4713;5189	0.62101	0.441281	0.600703	0.978136	0.960405	1026;1502;2392;3139;3141;4219	1.00917	0.592767	0.27476	0.934296	0.928944
Usp11	-0.0400953	0.640398	1601;2449;3631;3662;4043;5731	0.611898	0.405979	0.610284	0.968965	0.960405	484;2172;2553;2584;3766;4614	0.815153	0.54893	0.411192	1	0.99152
Usp12	0.0516037	0.607374	1484;1775;2540;3065;3467;4793	0.843448	0.520616	0.387816	0.88705	0.885857	1422;2748;3150;3675;4440;4731	0.71051	0.45704	0.508821	1	0.99152
Usp15	0.0875231	0.67565	113;783;2448;3133;3612;5691	1.00199	0.579178	0.279069	0.815058	0.815058	524;2603;3082;3767;5432;6102	0.522678	0.354207	0.699719	1	0.99152
Usp16	0.0706528	0.597675	557;1720;2717;2787;3673;4938	0.751967	0.512332	0.468562	0.939392	0.937856	1277;2542;3428;3498;4495;5658	0.540997	0.387182	0.683204	1	0.99152
Usp21	-0.0794066	0.742366	1852;3070;3399;3423;5363;5669	0.619929	0.407419	0.60185	0.976165	0.960405	546;852;2792;2816;3145;4363	1.00698	0.636278	0.27607	0.936828	0.928944
Usp22	-0.0696756	0.650832	1565;2029;2964;4333;5282;5742	0.507913	0.362027	0.711487	0.989271	0.960405	473;933;1882;3251;4186;4650	0.75551	0.557884	0.465106	1	0.99152
Usp3	0.128762	0.859494	825;979;1776;2233;2238;4880	1.63333	0.736561	0.0722186	0.490139	0.481984	1335;3977;3982;4439;5236;5390	0.986361	0.468307	0.288258	0.93416	0.932175
Usp36	0.0445707	0.570845	1315;1603;2804;2869;4230;4716	0.718785	0.489335	0.500589	0.948485	0.944038	1499;1985;3346;3411;4612;4900	0.619051	0.438542	0.602711	1	0.99152
Usp44	0.112735	0.783963	952;1553;1937;2715;2903;3975	1.1642	0.671887	0.197645	0.745558	0.745558	2240;3312;3500;4278;4662;5263	0.693166	0.460219	0.526268	1	0.99152
Usp46	0.0561793	0.587711	701;1793;2823;3712;4167;4225	1.00527	0.503804	0.277112	0.818	0.815058	1990;2048;2503;3392;4422;5514	0.561199	0.423688	0.663056	1	0.99152
Usp49	-0.0543242	0.598546	568;1867;2852;4056;5672;5761	0.513956	0.376049	0.706661	0.995094	0.960405	454;543;2159;3363;4348;5647	1.0999	0.513078	0.226668	0.900149	0.900149
Usp7	-0.14648	0.739358	467;2572;3349;4082;5326;6166	0.518235	0.350257	0.703345	0.996356	0.960405	49;889;2133;2866;3643;5748	1.34221	0.63378	0.135361	0.797715	0.796355
Uty	0.281462	1.62461	37;440;755;1470;1975;2908	1.97866	1.39193	0.0341075	0.346515	0.346515	3307;4240;4745;5460;5775;6178	1.14802	0.664353	0.204443	0.893293	0.890663
Vdr	-0.0582134	0.632748	897;2133;2258;3383;5772;5793	0.606257	0.395168	0.616234	0.967283	0.960405	422;443;2832;3957;4082;5318	1.24632	0.542373	0.165636	0.826187	0.826187
Virma	0.033377	0.768228	165;385;1272;3092;5785;5831	1.35084	0.658461	0.132664	0.646153	0.64573	384;430;3123;4943;5830;6050	1.26829	0.511693	0.158364	0.824686	0.821636
Vps72	0.467412	3.74734	34;45;87;156;619;1328	5.24698	3.20503	2.17391e-05	0.0036	0.0036	4887;5596;6059;6128;6170;6181	3.541	1.87301	0.000849034	0.0342927	0.0342927
Vrk1	-0.180696	0.834045	1840;1964;2332;4074;5247;6193	0.588845	0.353592	0.634541	0.980224	0.960405	22;968;2141;3883;4251;4375	1.6805	0.714945	0.0654444	0.598762	0.596901
Wac	0.308879	2.07904	200;303;423;450;2149;2213	3.44984	1.78054	0.00107126	0.0554375	0.0554375	4002;4066;5765;5792;5912;6015	2.22006	0.989144	0.0200495	0.291246	0.291246
Wdhd1	-0.0126596	0.566699	584;1125;3887;4590;4832;5319	0.655301	0.435755	0.565095	0.965736	0.960405	896;1383;1625;2328;5090;5631	0.937199	0.485784	0.319472	0.958417	0.958011
Wdr11	-0.0369233	0.566985	1052;2134;2812;3258;5255;5748	0.590923	0.369639	0.632306	0.979512	0.960405	467;960;2957;3403;4081;5163	0.737633	0.486059	0.482244	1	0.99152
Wdr4	-0.00114527	0.634887	28;1629;1958;3510;5404;6045	1.57787	0.544331	0.081657	0.498982	0.498982	170;811;2705;4257;4586;6187	0.845005	0.452406	0.386542	1	0.99152
Wdr48	0.212335	1.27741	321;541;805;982;2676;4369	2.17835	1.09443	0.0217657	0.279411	0.278169	1846;3539;5233;5410;5674;5894	1.32794	0.582612	0.139325	0.80672	0.80672
Wdr5	-0.138129	0.736276	1434;1504;3663;4021;4898;6155	0.547555	0.347973	0.676824	0.990999	0.960405	60;1317;2194;2552;4711;4781	1.25814	0.631148	0.161751	0.824185	0.821636
Wdr61	-0.116014	0.808133	382;532;2564;4901;5949;6105	1.11431	0.507141	0.219877	0.781365	0.777777	110;266;1314;3651;5683;5833	1.63689	0.692612	0.0717391	0.625263	0.619109
Wdr77	0.344832	2.12562	21;167;366;1460;1632;2176	2.73427	1.8207	0.00602657	0.172069	0.169831	4039;4583;4755;5849;6048;6194	1.68851	0.89852	0.0641691	0.593654	0.593654
Wdr82	-0.59576	3.39289	3949;5818;6044;6090;6119;6124	3.66381	1.72367	0.000653382	0.0400741	0.0395714	91;96;125;171;397;2266	5.22342	2.90256	2.17391e-05	0.00225	0.00225
Wdr92	0.065016	0.652628	48;1003;3021;3195;4981;5465	1.35082	0.559509	0.132967	0.64573	0.64573	750;1234;3020;3194;5212;6167	0.612589	0.365854	0.60958	1	0.99152
Wsb2	-0.161368	1.01195	2130;3308;4002;5085;5701;5741	0.691823	0.465742	0.527586	0.951723	0.951723	474;514;1130;2213;2907;4085	1.18135	0.867166	0.190457	0.8761	0.873047
Wtap	-0.0297242	0.597903	1667;2347;3039;3269;4628;5617	0.588306	0.396745	0.635139	0.97932	0.960405	598;1587;2946;3176;3868;4548	0.813305	0.512534	0.412729	1	0.99152
Yaf2	0.166371	0.948399	374;547;1215;2628;3047;4153	1.10882	0.812749	0.222465	0.78217	0.777777	2062;3168;3587;5000;5668;5841	0.647646	0.431375	0.572986	1	0.99152
Yeats2	-0.0272652	0.541965	471;2191;3565;3855;4619;5787	0.533773	0.381207	0.690025	0.995368	0.960405	428;1596;2360;2650;4024;5744	0.787277	0.464612	0.435321	1	0.99152
Yeats4	-0.416866	2.67453	5041;5374;5661;5897;5942;5960	2.93307	1.37399	0.00402174	0.128077	0.128077	255;273;318;554;841;1174	4.34222	2.29012	0.000126812	0.0084	0.0084
Ythdc1	0.216094	1.24761	161;1086;1271;1785;2094;3075	1.83316	1.06904	0.0470145	0.411937	0.409426	3140;4121;4430;4944;5129;6054	1.07105	0.564022	0.2408	0.908346	0.906866
Ythdc2	0.125929	0.818972	855;1317;1724;1938;3332;4155	1.17265	0.70187	0.193977	0.741861	0.741168	2060;2883;4277;4491;4898;5360	0.704391	0.450654	0.514973	1	0.99152
Ythdf1	0.0138973	0.645351	1887;2420;3105;3728;4139;4216	1.01082	0.518467	0.273882	0.815734	0.813595	1999;2076;2487;3110;3795;4328	0.942504	0.553146	0.315911	0.961669	0.958011
Ythdf2	-0.00605668	0.643939	1985;2825;2881;3482;4012;5074	0.622454	0.474492	0.599156	0.978503	0.960405	1141;2203;2733;3334;3390;4230	1.00219	0.551945	0.278755	0.932562	0.928944
Ythdf3	-0.0525212	0.692462	977;3167;4069;4233;4556;5406	0.64735	0.428127	0.573256	0.968686	0.960405	809;1659;1982;2146;3048;5238	1.06149	0.593496	0.245969	0.915335	0.915335
Ywhab	-0.107715	0.772432	1527;2244;3141;4966;5620;5729	0.60768	0.387863	0.614752	0.967709	0.960405	486;595;1249;3074;3971;4688	1.08175	0.662022	0.235529	0.915577	0.906866
Ywhae	-0.112749	0.870488	1334;3801;4276;4582;4918;5725	0.894111	0.450219	0.349242	0.874953	0.874953	490;1297;1633;1939;2414;4881	1.48861	0.74599	0.0986498	0.726062	0.726062
Ywhaz	-0.177785	1.29224	4034;4195;4205;4449;5330;5734	1.68406	0.655744	0.0646558	0.469605	0.469605	481;885;1766;2010;2020;2181	2.72829	1.1072	0.00608454	0.130857	0.130857
Yy1	-0.0362992	0.629308	1251;1884;3252;4833;4971;5067	0.566882	0.415157	0.657313	0.989555	0.960405	1148;1244;1382;2963;4331;4964	0.985293	0.53941	0.288772	0.932175	0.932175
Zbtb16	0.107734	0.727321	625;694;2679;2759;3943;4138	1.05948	0.623392	0.24688	0.796947	0.795743	2077;2272;3456;3536;5521;5590	0.581212	0.404691	0.64239	1	0.99152
Zbtb33	0.0449233	0.573156	843;1234;1492;2736;4934;5447	0.915513	0.49132	0.334023	0.865637	0.864575	768;1281;3479;4723;4981;5372	0.596594	0.408733	0.626441	1	0.99152
Zbtb7c	0.0337878	0.532283	764;1839;2945;3243;3422;5500	0.864761	0.456302	0.371255	0.880799	0.880799	715;2793;2972;3270;4376;5451	0.58807	0.418733	0.635325	1	0.99152
Zcchc4	0.0895791	0.656729	884;1032;2035;2522;3862;4842	0.842633	0.562907	0.388536	0.886248	0.886248	1373;2353;3693;4180;5183;5331	0.552341	0.392026	0.672106	1	0.99152
Zcwpw1	0.221156	1.37877	543;734;1060;1821;1991;2356	2.52718	1.1813	0.0101727	0.213241	0.213241	3859;4224;4394;5155;5481;5672	1.53565	0.68132	0.0891002	0.683102	0.683102
Zfp217	-0.0316256	0.590005	1398;2127;3032;4273;4828;5335	0.505909	0.388011	0.71332	0.9885	0.960405	880;1387;1942;3183;4088;4817	0.702556	0.505758	0.516577	1	0.99152
Zfp516	0.021602	0.50532	789;1325;2663;3318;3687;5796	0.746105	0.433208	0.474111	0.939148	0.939148	419;2528;2897;3552;4890;5426	0.544595	0.409556	0.67968	1	0.99152
Zfp532	0.013169	0.550479	1433;1580;3272;3790;4366;4785	0.680936	0.450924	0.538711	0.958223	0.955032	1430;1849;2425;2943;4635;4782	0.68257	0.47189	0.537091	1	0.99152
Zfp541	-0.0855777	0.710111	586;2674;3863;4946;5124;5776	0.600881	0.395546	0.621981	0.969868	0.960405	439;1091;1269;2352;3541;5629	1.06631	0.608629	0.24356	0.910465	0.910465
Zfp57	-0.205281	0.939408	524;858;1053;2358;5216;6214	1.25371	0.55152	0.163112	0.705258	0.70426	1;999;3857;5162;5357;5691	3.01557	0.805335	0.00336594	0.0929	0.0929
Zfp592	0.229649	1.37916	324;473;810;933;2724;3640	2.25918	1.18158	0.0181353	0.273018	0.267292	2575;3491;5282;5405;5742;5891	1.38255	0.627994	0.124035	0.757941	0.751708
Zfp687	-0.140195	0.894475	1044;3343;4067;4755;5754;5773	0.703731	0.427749	0.515476	0.946373	0.945251	442;461;1460;2148;2872;5171	1.21716	0.766533	0.176332	0.853819	0.853819
Zfp711	0.112068	0.737894	123;1081;1288;3169;4644;4811	1.05197	0.6325	0.25099	0.802394	0.801977	1404;1571;3046;4927;5134;6092	0.594649	0.356702	0.628415	1	0.99152
Zgpat	-0.0225112	0.563502	914;2368;3100;3375;5253;5371	0.56471	0.391738	0.659531	0.989297	0.960405	844;962;2840;3115;3847;5301	0.736487	0.483052	0.483436	1	0.99152
Zhx1	0.0384992	0.511244	780;1321;2661;3396;4054;5394	0.608204	0.438291	0.614209	0.968695	0.960405	821;2161;2819;3554;4894;5435	0.531503	0.386059	0.692072	1	0.99152
Zmym2	-0.129484	1.04012	3102;3625;4228;4648;5082;5456	1.02524	0.541087	0.265791	0.812085	0.812085	759;1133;1567;1987;2590;3113	1.80115	0.891291	0.0502331	0.519912	0.519912
Zmym3	0.0882245	0.669846	283;690;2048;2393;4769;5295	0.937423	0.574177	0.319332	0.854304	0.854304	920;1446;3822;4167;5525;5932	0.576042	0.365955	0.647886	1	0.99152
Zmynd11	0.105126	0.757416	972;1013;1105;3581;3622;4343	1.2041	0.649143	0.181262	0.732122	0.732122	1872;2593;2634;5110;5202;5243	0.664514	0.440221	0.55557	1	0.99152
Zmynd8	0.23447	1.32527	109;346;1049;1676;2124;4020	1.73458	1.13552	0.0581135	0.453943	0.450284	2195;4091;4539;5166;5869;6106	1.05268	0.546703	0.250742	0.926848	0.920769
Znhit1	0.254292	1.64782	46;53;328;1447;4389;4514	2.97698	1.41076	0.0036872	0.12212	0.12212	1701;1826;4768;5887;6162;6169	1.47546	0.675238	0.101432	0.733502	0.733502
Zranb3	0.112728	0.736437	560;1256;2136;2935;3737;3781	1.29459	0.631205	0.149426	0.683564	0.679681	2434;2478;3280;4079;4959;5655	0.708297	0.408431	0.510942	1	0.99152
Zzz3	0.0210482	0.564171	1216;1972;3217;4053;4111;4455	0.867141	0.476335	0.369417	0.885317	0.880799	1760;2104;2162;2998;4243;4999	0.662178	0.483606	0.55804	1	0.99152

## Sheet: S2b. LLC WT_notx vs NSG
	Fold-change		STARS - enriched						STARS depleted
Gene Symbol	Average LFC	Average -log(p-values)	Ranks of perturbations enriched	STARS Score enriched	Average Score enriched	p-value enriched	FDR enriched	q-value enriched	Ranks of perturbations depleted	STARS Score depleted	Average Score depleted	p-value depleted	FDR depleted	q-value depleted
1500002F19Rik	-0.0105282	0.372303	1492;5015	0.437818	0.208006	0.738204	0.987452	0.979331	1200;4723	0.506347	0.248218	0.712843	1	0.991667		Tumor Model:	LLC
A1cf	-0.0130655	0.62616	1907;2207;2318;2516;3850;5909	0.84536	0.466533	0.386209	0.912357	0.909421	306;2365;3699;3897;4008;4308	0.954573	0.536762	0.308135	0.953779	0.937427		Screening conditions compared in this tab:	Untreated WT mice taken down on D12 compared to untreated NSG mice that were taken down on D12
A730035I17Rik	-0.0614458	0.737557	2452;2729;3281;4057;4532;5625	0.715462	0.426562	0.503773	0.942653	0.942653	590;1683;2158;2934;3486;3763	1.30702	0.632158	0.145671	0.828976	0.825283
Abraxas1	-0.0834508	0.740651	828;3095;3697;4649;5365;5766	0.626753	0.387634	0.594661	0.979859	0.976372	449;850;1566;2518;3120;5387	1.02078	0.634797	0.268182	0.955075	0.937427
Abraxas2	-0.011216	0.58904	1492;1902;3616;3908;4273;5015	0.558602	0.436409	0.665814	0.991536	0.979331	1200;1942;2307;2599;4313;4723	0.808695	0.504917	0.416597	0.982741	0.976091
Actl6a	0.230229	1.67257	8;10;904;2788;4421;4551	4.41345	1.42709	0.000108696	0.03	0.027	1664;1794;3427;5311;6205;6207	2.06412	0.61769	0.0285543	0.47286	0.470733
Actl6b	-0.0667746	0.71915	977;3542;3632;4241;4485;5823	0.778293	0.408111	0.443384	0.920105	0.918928	392;1730;1974;2583;2673;5238	1.29796	0.616378	0.148453	0.836184	0.825283
Actr3b	0.078396	0.809443	1158;2072;2281;2304;2423;4329	1.48156	0.693687	0.100397	0.692742	0.691286	1886;3792;3911;3934;4143;5057	0.889703	0.516482	0.352353	0.938096	0.938096
Actr5	-0.0475348	0.622506	1003;1831;2121;2650;5509;6037	0.787277	0.403199	0.435321	0.924221	0.918154	178;706;3565;4094;4384;5212	0.922551	0.533654	0.329097	0.959479	0.937427
Actr6	-0.00380422	0.60973	1985;2396;2807;3331;3824;5209	0.691089	0.470463	0.528385	0.955247	0.954808	1006;2391;2884;3408;3819;4230	1.00219	0.522648	0.278755	0.967753	0.937427
Actr8	-0.294701	1.84551	3325;3876;5313;5840;5898;6157	1.419	0.790452	0.114434	0.734504	0.722015	58;317;375;902;2339;2890	2.43809	1.58086	0.0120556	0.307138	0.30591
Adar	-0.313927	2.27067	4103;5221;5614;5746;5915;6044	2.16083	1.10134	0.0229215	0.575121	0.549222	171;300;469;601;994;2112	3.27747	1.94468	0.00159662	0.139158	0.139158
Adnp	-0.0567312	0.622166	965;1093;3183;4711;4776;6015	0.669477	0.374878	0.550424	0.962515	0.962208	200;1439;1504;3032;5122;5250	0.908391	0.533355	0.339036	0.943603	0.937427
Aebp2	0.0336507	0.559484	474;2021;2182;2271;4671;5491	0.967614	0.479615	0.300035	0.880954	0.874557	724;1544;3944;4033;4194;5741	0.603309	0.401651	0.619314	1	0.991667
Aicda	-0.0957932	0.78852	2004;2283;3472;3747;3762;6154	0.715462	0.402421	0.503773	0.942653	0.942653	61;2453;2468;2743;3932;4211	1.25131	0.67589	0.164163	0.857584	0.857584
Aire	-0.0241158	0.610803	1781;2084;3489;3558;4091;5516	0.595979	0.420397	0.627008	0.987002	0.979331	699;2124;2657;2726;4131;4434	0.879453	0.523574	0.360037	0.941899	0.939953
Alkbh1	0.131311	0.912348	242;1019;1690;2865;2907;3645	1.39004	0.781906	0.121948	0.726424	0.725523	2570;3308;3350;4525;5196;5973	0.764251	0.424954	0.456696	0.997741	0.991667
Anp32a	-0.00119018	0.518059	799;1240;2217;2537;5233;5851	0.835867	0.432582	0.393906	0.912319	0.909421	364;982;3678;3998;4975;5416	0.725242	0.444168	0.494436	1	0.991667
Anp32b	0.0893558	0.734993	590;884;1934;3336;3791;3948	1.18196	0.629969	0.190188	0.801405	0.79564	2267;2424;2879;4281;5331;5625	0.645289	0.400721	0.575333	1	0.991667
Anp32e	0.00143267	0.492566	773;1117;1806;3442;4903;5882	0.75632	0.419592	0.464239	0.926241	0.924067	333;1312;2773;4409;5098;5442	0.612376	0.422337	0.609838	1	0.991667
Apbb1	0.0287174	0.559873	417;1764;2860;4386;4391;4567	0.802441	0.479979	0.421884	0.921689	0.918154	1648;1824;1829;3355;4451;5798	0.746648	0.421335	0.473461	1	0.991667
Apex1	0.101795	0.747266	92;1508;1973;2665;4092;4580	1.08382	0.64054	0.234586	0.83185	0.83185	1635;2123;3550;4242;4707;6123	0.53191	0.348894	0.691675	1	0.991667
Apobec1	-0.0191514	0.538993	701;1420;2222;4277;5452;5533	0.615394	0.400958	0.606583	0.982879	0.979331	682;763;1938;3993;4795;5514	0.873182	0.462072	0.364737	0.948201	0.946264
Apobec2	0.0576842	0.680069	1049;2114;2500;2870;3266;4235	0.999107	0.582892	0.280563	0.868434	0.867231	1980;2949;3345;3715;4101;5166	0.592728	0.462361	0.630399	1	0.991667
Apobec3	-0.0231268	0.625311	440;1559;4517;4538;4735;5280	0.805602	0.461667	0.419226	0.92074	0.918154	935;1480;1677;1698;4656;5775	1.35488	0.535962	0.131504	0.809554	0.802938
Arid1a	0.135506	1.02047	716;735;1189;2069;2196;4379	1.6699	0.874438	0.0668056	0.650765	0.643587	1836;4019;4146;5026;5480;5499	1.01016	0.507466	0.274272	0.96637	0.937427
Arid1b	0.0801552	0.693656	748;1317;1547;2702;3757;4590	0.883613	0.594541	0.356867	0.906399	0.904837	1625;2458;3513;4668;4898;5467	0.529194	0.395706	0.694147	1	0.991667
Arid2	-0.098294	1.06273	3584;3721;4158;4219;4678;5304	1.32793	0.598391	0.139353	0.737278	0.736395	911;1537;1996;2057;2494;2631	2.2395	0.910637	0.0188792	0.367812	0.367812
Arid3a	0.134613	0.979479	359;840;2133;2481;2934;3065	1.84164	0.839388	0.0462681	0.633223	0.6104	3150;3281;3734;4082;5375;5856	1.05232	0.476947	0.250821	0.944	0.937427
Arid3b	0.085054	0.732822	803;1151;2112;2963;3320;4063	1.10715	0.628095	0.223112	0.81742	0.81742	2152;2895;3252;4103;5064;5412	0.605534	0.418869	0.616992	1	0.991667
Arid3c	0.032792	0.580501	1306;1989;2410;3260;3539;4908	0.81035	0.497599	0.415075	0.921399	0.917846	1307;2676;2955;3805;4226;4909	0.614269	0.445922	0.607831	1	0.991667
Arid4a	-0.252187	1.47439	1524;4703;4748;4886;5964;6175	1.52233	0.600228	0.0916244	0.680404	0.680404	40;251;1329;1467;1512;4691	2.41203	1.2632	0.0131944	0.321324	0.316754
Arid4b	0.0936445	0.723956	161;1663;2003;3225;3795;4256	0.986218	0.620555	0.288348	0.86977	0.86977	1959;2420;2990;4212;4552;6054	0.545544	0.36776	0.678749	1	0.991667
Arid5a	-0.0449698	0.645619	1303;1512;2526;5103;5145;5518	0.661406	0.409403	0.558739	0.967858	0.966815	697;1070;1112;3689;4703;4912	1.19766	0.553393	0.18385	0.882481	0.879794
Arid5b	-0.0219004	0.550695	711;2430;2448;3303;5399;5546	0.580418	0.397081	0.643174	0.990787	0.979331	669;816;2912;3767;3785;5504	0.831824	0.472089	0.397289	0.971802	0.967016
Arntl	0.158538	1.03853	138;385;1174;2563;3375;4074	1.35084	0.889973	0.132664	0.732307	0.731542	2141;2840;3652;5041;5830;6077	0.635473	0.425092	0.585558	1	0.991667
Arrb1	-0.111954	0.965159	2106;3899;4106;4783;5170;5550	0.944026	0.489467	0.31505	0.888794	0.884237	665;1045;1432;2109;2316;4109	1.56754	0.827079	0.0832862	0.679419	0.679419
Asf1a	0.0338387	0.561782	636;1644;3276;3578;3608;4944	0.779769	0.481588	0.442114	0.920931	0.918928	1271;2607;2637;2939;4571;5579	0.680915	0.413535	0.538796	1	0.991667
Asf1b	0.0602288	0.618588	379;1619;2435;3708;4016;4359	0.923906	0.530272	0.328318	0.889843	0.884237	1856;2199;2507;3780;4596;5836	0.554667	0.383276	0.66976	1	0.991667
Ash1l	0.269851	2.07697	128;222;235;827;1178;3738	3.01611	1.77865	0.00289614	0.19184	0.19184	2477;5037;5388;5980;5993;6087	1.89669	0.954052	0.0410109	0.543312	0.543312
Ash2l	-0.154137	1.09628	1493;3054;4845;5393;5675;5834	0.994106	0.502974	0.283694	0.869996	0.867413	381;540;822;1370;3161;4722	1.66685	0.939337	0.067192	0.635829	0.63078
Asxl1	0.0863542	0.689204	347;1108;1944;3521;3620;4468	0.859549	0.590762	0.375147	0.91494	0.909421	1747;2595;2694;4271;5107;5868	0.528377	0.367292	0.694856	1	0.991667
Asxl2	0.0685959	0.647069	781;1118;1948;3327;3822;4497	0.84269	0.554645	0.388479	0.91511	0.909421	1718;2393;2888;4267;5097;5434	0.511639	0.38914	0.708547	1	0.991667
Asxl3	0.040139	0.769305	85;518;1734;2382;5768;5885	1.1332	0.659429	0.211178	0.820915	0.81509	330;447;3833;4481;5697;6130	1.23972	0.494297	0.167954	0.866455	0.861369
Atad2	0.0793558	0.678052	568;1471;1633;3044;3571;4619	0.837358	0.581184	0.39271	0.913382	0.909421	1596;2644;3171;4582;4744;5647	0.52894	0.384178	0.694388	1	0.991667
Atad2b	0.0903451	0.752174	821;886;1361;2297;3696;4888	0.999592	0.644653	0.280364	0.869442	0.867231	1327;2519;3918;4854;5329;5394	0.597089	0.409376	0.625832	1	0.991667
Atf2	-0.0647996	0.717917	2171;2454;2909;4433;5173;5525	0.611898	0.40345	0.610284	0.98406	0.979331	690;1042;1782;3306;3761;4044	1.11936	0.615337	0.217627	0.907783	0.904605
Atf7ip	-0.0462919	0.693573	1461;2708;3479;4688;4900;4982	0.575805	0.431075	0.648122	0.991034	0.979331	1233;1315;1527;2736;3507;4754	0.894996	0.594454	0.348507	0.941481	0.937427
Atf7ip2	0.0630093	0.609281	264;1847;1901;3137;3793;5259	0.717913	0.522296	0.501314	0.943382	0.942653	956;2422;3078;4314;4368;5951	0.514431	0.359617	0.706306	1	0.991667
Atm	0.169152	1.13429	99;1222;1237;1674;2917;3458	1.52728	0.972014	0.0908043	0.683509	0.68009	2757;3298;4541;4978;4993;6116	0.848143	0.487248	0.384031	0.95921	0.958699
Atn1	-0.0603053	0.661769	1131;3009;3390;3505;4367;5986	0.60398	0.381409	0.618611	0.990735	0.979331	229;1848;2710;2825;3206;5084	0.973981	0.567258	0.295912	0.962731	0.937427
Atr	0.144432	1.05614	192;591;1013;1839;2265;5442	1.61025	0.905007	0.07575	0.653344	0.650378	773;3950;4376;5202;5624;6023	0.971436	0.483044	0.2976	0.962551	0.937427
Atrx	-0.147147	1.03118	2677;3084;3215;5235;5612;5949	0.811253	0.462724	0.414399	0.923612	0.917846	266;603;980;3000;3131;3538	1.46768	0.883661	0.103248	0.730675	0.730675
Atxn7	0.0993628	0.810736	24;468;2314;3659;4714;5194	1.64341	0.694952	0.0708829	0.648519	0.643587	1021;1501;2556;3901;5747;6191	0.546784	0.356746	0.677558	1	0.991667
Atxn7l3	0.116064	0.945643	666;739;1567;1680;2232;5208	1.6385	0.810335	0.0715097	0.643587	0.643587	1007;3983;4535;4648;5476;5549	0.989717	0.491753	0.286251	0.967412	0.937427
Aurka	-0.0533889	0.632959	936;1113;3167;3642;5727;5878	0.660525	0.390373	0.559703	0.967503	0.966815	337;488;2573;3048;5102;5279	1.17589	0.542574	0.192836	0.882144	0.880028
Aurkb	-0.0257708	0.604961	64;1938;2624;4184;5758;5913	1.23152	0.483962	0.171065	0.776121	0.773485	302;457;2031;3591;4277;6151	1.22352	0.518572	0.174017	0.865381	0.861369
Aurkc	-0.0299136	0.612616	953;975;1794;2482;5226;6120	0.861046	0.455068	0.373889	0.918635	0.909421	95;989;3733;4421;5240;5262	1.07095	0.525224	0.241048	0.937033	0.934628
Babam1	0.0699736	0.640196	160;1808;1903;2828;4655;4946	0.867744	0.548805	0.368907	0.914536	0.909421	1269;1560;3387;4312;4407;6055	0.526582	0.358441	0.696467	1	0.991667
Babam2	0.0683588	0.649518	256;894;1488;2798;4424;5595	0.917908	0.556763	0.332444	0.886519	0.886519	620;1791;3417;4727;5321;5959	0.541172	0.359422	0.68303	1	0.991667
Bahd1	0.104824	0.885839	1021;1546;1593;2236;3072;3500	1.49582	0.759143	0.0969444	0.689013	0.684814	2715;3143;3979;4622;4669;5194	0.828587	0.502305	0.399879	0.970968	0.967016
Banp	-0.0473055	0.768175	74;3952;4147;4342;4833;5849	1.172	0.553116	0.194476	0.797158	0.79564	366;1382;1873;2068;2263;6141	1.61195	0.658343	0.0754553	0.664649	0.664649
Bap1	-0.0920236	0.715029	1166;2029;2569;2875;4390;6192	0.702352	0.378244	0.516923	0.947978	0.946996	23;1825;3340;3646;4186;5049	1.66154	0.612982	0.0681437	0.633966	0.633966
Bard1	0.0602783	0.639665	1089;1264;1754;2949;4267;4501	0.840373	0.548292	0.390364	0.913054	0.909421	1714;1948;3266;4461;4951;5126	0.508567	0.411865	0.710909	1	0.991667
Baz1a	-0.156235	1.20599	45;3992;4230;5691;5759;6140	1.37779	0.677149	0.125425	0.731352	0.726459	75;456;524;1985;2223;6170	2.03587	1.03328	0.0301171	0.488961	0.484699
Baz1b	0.0965238	0.792198	820;1351;1608;2178;3532;4098	1.0848	0.678942	0.233901	0.831202	0.831202	2117;2683;4037;4607;4864;5395	0.627446	0.43718	0.593891	1	0.991667
Baz2a	0.142537	0.976214	315;409;1693;1979;3640;3917	1.30548	0.83657	0.146191	0.742613	0.742613	2298;2575;4236;4522;5806;5900	0.689651	0.436854	0.529855	1	0.991667
Baz2b	0.158552	1.09647	294;844;1087;2363;2466;3461	1.52502	0.93958	0.0911715	0.68009	0.68009	2754;3749;3852;5128;5371;5921	0.869038	0.500369	0.368014	0.946323	0.946264
Bcor	0.0281562	0.563367	1193;1473;1498;2894;4841;5315	0.911941	0.482926	0.336525	0.891658	0.890742	900;1374;3321;4717;4742;5022	0.568781	0.429887	0.655308	1	0.991667
Bcorl1	0.0971825	0.835551	740;1656;1872;2839;3025;3413	1.56141	0.716083	0.0845423	0.660387	0.654884	2802;3190;3376;4343;4559;5475	0.869563	0.475204	0.367592	0.94966	0.946264
Bmi1	-0.0272702	0.746589	757;3775;4099;4198;4255;4629	0.881455	0.53439	0.358461	0.907664	0.904837	1586;1960;2017;2116;2440;5458	1.46833	0.639826	0.103214	0.736733	0.730675
Bptf	0.0214986	0.533321	752;1683;3318;3765;4054;4839	0.651694	0.457209	0.568781	0.971033	0.971033	1376;2161;2450;2897;4532;5463	0.694851	0.424842	0.524518	1	0.991667
Brca1	0.0779788	0.712706	205;664;1226;4050;4237;5324	1.09995	0.610895	0.2266	0.822917	0.822917	891;1978;2165;4989;5551;6010	0.63078	0.379651	0.590374	1	0.991667
Brca2	0.0168189	0.656453	2247;2456;2583;2652;4265;4366	0.919725	0.561944	0.330936	0.885347	0.885347	1849;1950;3563;3632;3759;3968	1.1688	0.562663	0.195699	0.885459	0.885459
Brcc3	0.00944005	0.558457	1848;1874;2147;3615;4280;5024	0.635879	0.464842	0.585203	0.977897	0.976372	1191;1935;2600;4068;4341;4367	0.919128	0.478734	0.331335	0.955906	0.937427
Brd1	-0.20966	1.366	1470;3874;4464;5847;5848;6013	1.38707	0.600316	0.122926	0.727021	0.725523	202;367;368;1751;2341;4745	2.46108	1.17019	0.0115024	0.302349	0.300187
Brd2	-0.263999	1.75392	3681;3949;5465;5505;5803;6095	1.62298	0.787425	0.0740048	0.658882	0.650378	120;412;710;750;2266;2534	2.60887	1.50249	0.00826208	0.268275	0.257667
Brd3	0.0956803	0.774815	832;1116;1735;2306;3350;4323	0.94879	0.664055	0.311946	0.889126	0.884237	1892;2865;3909;4480;5099;5383	0.594988	0.423476	0.628106	1	0.991667
Brd4	-0.323462	1.89045	1206;4294;5623;5756;6054;6189	1.89453	0.797474	0.0412452	0.626624	0.6104	26;161;459;592;1921;5009	2.99507	1.61915	0.00355435	0.189871	0.181829
Brd7	-0.00170191	0.579367	1756;1887;2342;4248;4377;4936	0.599977	0.451803	0.622784	0.98976	0.979331	1279;1838;1967;3873;4328;4459	0.864803	0.496641	0.371161	0.951458	0.951458
Brd8	0.0480107	0.653292	1651;1722;2067;2443;3626;4865	0.879529	0.559942	0.360002	0.907403	0.904837	1350;2589;3772;4148;4493;4564	0.804154	0.467707	0.420353	0.983198	0.976091
Brd9	-0.251437	1.75039	3406;5147;5148;5207;5586;6087	2.04837	0.81591	0.029413	0.632571	0.605527	128;629;1008;1067;1068;2809	3.12775	1.49947	0.00226329	0.156167	0.156167
Brdt	-0.0144781	0.641311	1130;2770;3863;3950;4362;4643	0.759435	0.471	0.461204	0.925762	0.924067	1572;1853;2265;2352;3445;5085	0.924762	0.549675	0.327537	0.961706	0.937427
Brms1	-0.15559	1.09839	2168;3487;4516;5204;5548;5869	0.805123	0.49563	0.419633	0.920413	0.918154	346;667;1011;1699;2728;4047	1.35405	0.941198	0.131739	0.808	0.802938
Brms1l	0.115107	0.819209	277;663;1852;2059;3374;5009	1.09237	0.702104	0.230333	0.8292	0.827709	1206;2841;4156;4363;5552;5938	0.662835	0.382559	0.557216	1	0.991667
Brpf1	0.0252761	0.57007	1414;2016;2018;2582;3836;5467	0.81602	0.488651	0.410351	0.922038	0.917846	748;2379;3633;4197;4199;4801	0.672237	0.453775	0.547506	1	0.991667
Brpf3	0.0776042	0.672716	184;1234;1660;2338;4535;5374	0.931991	0.576647	0.322842	0.888083	0.884237	841;1680;3877;4555;4981;6031	0.587734	0.356348	0.635629	1	0.991667
Brwd1	0.10075	0.833352	434;1929;2251;2292;2553;4183	1.38322	0.7142	0.123873	0.727426	0.726459	2032;3662;3923;3964;4286;5781	0.829177	0.458119	0.399366	0.971145	0.967016
Brwd3	0.0592086	0.664956	368;533;3557;3559;4178;4818	1.11298	0.569981	0.220448	0.822212	0.81742	1397;2037;2656;2658;5682;5847	0.783993	0.409267	0.438309	0.988883	0.986033
Bub1	0.0418916	0.570094	985;1612;2202;3207;4413;4607	0.779718	0.488702	0.442225	0.920005	0.918928	1608;1802;3008;4013;4603;5230	0.506473	0.407677	0.712709	1	0.991667
Carm1	0.140689	1.0552	560;1260;1405;2093;2518;3110	1.80367	0.90421	0.0499722	0.612993	0.6104	3105;3697;4122;4810;4955;5655	1.02691	0.533899	0.265072	0.954261	0.937427
Cbx1	0.183187	1.25603	69;1239;1374;1386;1871;4077	1.98392	1.07626	0.0337524	0.61422	0.605527	2138;4344;4829;4841;4976;6146	1.22099	0.543978	0.174771	0.861369	0.861369
Cbx2	0.140272	1.01112	80;187;1161;2464;4034;5400	1.92005	0.866384	0.0389952	0.639366	0.6104	815;2181;3751;5054;6028;6135	0.811697	0.420249	0.414025	0.986512	0.976091
Cbx3	-0.0224006	0.634556	390;1307;4439;4812;4830;5270	0.769747	0.476411	0.45136	0.925064	0.921884	945;1385;1403;1776;4908;5825	1.29199	0.543883	0.150488	0.839084	0.825283
Cbx3-ps6	0.183443	0.677096	1307	0.677096	0.338548	0.542682	0.956045	0.956045	4908	0.102467	0.0512333	0.914993	0.994244	0.991667
Cbx3-ps7	0.183443	0.677096	1307	0.677096	0.338548	0.542682	0.956045	0.956045	4908	0.102467	0.0512333	0.914993	0.994244	0.991667
Cbx3-ps8	0.183443	0.677096	1307	0.677096	0.338548	0.542682	0.956045	0.956045	4908	0.102467	0.0512333	0.914993	0.994244	0.991667
Cbx4	-0.0496475	0.599286	1406;1513;2935;4094;5093;5870	0.535697	0.356856	0.688197	0.990142	0.979331	345;1122;2121;3280;4702;4809	0.667899	0.513745	0.552023	1	0.991667
Cbx5	-0.198433	1.2983	3622;3861;4027;4837;5524;6111	1.35495	0.563912	0.131473	0.730604	0.728328	104;691;1378;2188;2354;2593	2.27741	1.11248	0.0174686	0.3616	0.3616
Cbx6	0.0885426	0.762731	1012;1084;1939;2728;3470;3914	1.2045	0.653708	0.181181	0.791652	0.791197	2301;2745;3487;4276;5131;5203	0.65761	0.439007	0.562676	1	0.991667
Cbx7	-0.0363318	0.635408	777;2861;3921;4227;4651;5300	0.597795	0.418656	0.62513	0.987802	0.979331	915;1564;1988;2294;3354;5438	0.95519	0.544625	0.307754	0.954382	0.937427
Cbx8	0.077109	0.836261	605;631;704;2107;5254;5307	1.69302	0.716635	0.0635568	0.645706	0.643587	908;961;4108;5511;5584;5610	0.925304	0.489273	0.32726	0.96431	0.937427
Cdc6	0.0140943	0.564645	1637;2055;2276;2494;4810;5014	0.855465	0.484015	0.378434	0.918894	0.909421	1201;1405;3721;3939;4160;4578	0.796173	0.482639	0.42754	0.977909	0.97787
Cdc73	-0.189703	1.20421	544;3003;3418;5874;5983;6096	1.44544	0.546938	0.108272	0.717192	0.715667	119;232;341;2797;3212;5671	2.55435	1.03156	0.00920048	0.26269	0.257667
Cdk1	-0.207208	1.3525	2612;4024;4924;5175;5725;6034	1.05047	0.588807	0.251726	0.843842	0.841758	181;490;1040;1291;2191;3603	1.75597	1.15883	0.0554771	0.596558	0.591885
Cdk17	0.031727	0.708093	2122;2136;2791;3256;3506;3870	1.23396	0.60689	0.17	0.779834	0.773485	2345;2709;2959;3424;4079;4093	1.08798	0.566356	0.232525	0.92341	0.92341
Cdk2	0.21815	1.70529	293;775;778;906;1194;2967	2.89635	1.46079	0.00426932	0.243793	0.236667	3248;5021;5309;5437;5440;5922	1.87599	0.828918	0.0426775	0.560905	0.556574
Cdk5	0.029075	0.55797	135;1682;2842;4353;4656;5218	0.932582	0.478386	0.322484	0.888576	0.884237	997;1559;1862;3373;4533;6080	0.733192	0.39325	0.486657	1	0.991667
Cdk7	-0.0862296	0.679946	1349;1366;2863;4067;5251;6123	0.570984	0.3457	0.653036	0.988508	0.979331	92;964;2148;3352;4849;4866	1.08382	0.582888	0.234586	0.929364	0.929364
Cdk9	0.0061825	0.511619	169;2155;2167;4093;4960;5710	0.847208	0.438666	0.384802	0.91294	0.909421	505;1255;2122;4048;4060;6046	0.643154	0.415127	0.577547	1	0.991667
Cdyl	0.0262091	0.662373	283;883;1070;4785;5328;5472	1.23714	0.567784	0.16899	0.779521	0.773485	743;887;1430;5145;5332;5932	0.953816	0.480106	0.308611	0.95347	0.937427
Cdyl2	-0.0579275	0.679534	1779;2873;3233;3419;4724;5831	0.571959	0.390796	0.652039	0.989712	0.979331	384;1491;2796;2982;3342;4436	0.90386	0.582469	0.342281	0.944697	0.937427
Cecr2	0.116411	0.918647	730;787;921;1904;3039;4984	1.39531	0.787211	0.120806	0.724833	0.724833	1231;3176;4311;5294;5428;5485	0.761425	0.467369	0.4593	0.998163	0.991667
Cenpa	0.0686974	0.66271	172;581;2361;2704;4617;5585	1.05282	0.568077	0.250628	0.845295	0.841758	630;1598;3511;3854;5634;6043	0.527367	0.361034	0.695746	1	0.991667
Cenpc1	0.00666206	0.554479	1400;2429;2656;3504;4238;4875	0.63238	0.454305	0.588622	0.977691	0.976372	1340;1977;2711;3559;3786;4815	0.705925	0.475313	0.513411	1	0.991667
Chaf1a	-0.0793814	0.856396	3113;3134;3231;3285;4803;5804	1.03139	0.480537	0.262209	0.844782	0.841758	411;1412;2930;2984;3081;3102	1.81038	0.733958	0.0494348	0.597547	0.591885
Chaf1b	-0.110931	1.02747	33;215;3405;5239;5866;6202	1.80694	0.737909	0.0497065	0.623591	0.6104	13;349;976;2810;6000;6182	1.90582	0.880612	0.0404251	0.553256	0.543312
Chd1	0.160687	1.04143	76;641;1007;2336;3460;4201	1.30035	0.892487	0.147793	0.746177	0.746177	2014;2755;3879;5208;5574;6139	0.712256	0.412428	0.506902	1	0.991667
Chd1l	0.134159	0.948125	458;495;1281;2042;3781;4023	1.16565	0.812503	0.197188	0.798396	0.796852	2192;2434;4173;4934;5720;5757	0.668323	0.440888	0.551587	1	0.991667
Chd2	0.123203	0.915797	472;1380;1523;2389;2755;3676	1.36797	0.784825	0.128051	0.731214	0.726459	2539;3460;3826;4692;4835;5743	0.751127	0.461988	0.469193	1	0.991667
Chd3	0.147406	1.05313	336;867;2046;2177;2188;3431	1.67697	0.902457	0.0659106	0.653581	0.643587	2784;4027;4038;4169;5348;5879	1.01478	0.504867	0.2717	0.959352	0.937427
Chd4	-0.0519544	0.82696	22;369;2110;5123;5690;6185	1.6805	0.697134	0.0654444	0.656824	0.643587	30;525;1092;4105;5846;6193	1.54861	0.708854	0.0869118	0.685362	0.685362
Chd5	0.159571	1.03678	84;577;1398;2400;2610;4529	1.34209	0.888505	0.135395	0.73998	0.736395	1686;3605;3815;4817;5638;6131	0.804429	0.416921	0.420163	0.984144	0.976091
Chd6	0.0329113	0.544075	360;2224;2257;3141;3837;5587	0.686088	0.466425	0.533483	0.956113	0.956045	628;2378;3074;3958;3991;5855	0.629728	0.388922	0.591446	1	0.991667
Chd7	0.0124361	0.538959	1494;1535;2658;2727;4968;4993	0.756492	0.462024	0.464099	0.927078	0.924067	1222;1247;3488;3557;4680;4721	0.716023	0.46123	0.503163	1	0.991667
Chd8	0.0425841	0.563107	798;1787;1924;3005;4297;4995	0.70921	0.482714	0.509967	0.946756	0.945047	1220;1918;3210;4291;4428;5417	0.506583	0.391288	0.712647	1	0.991667
Chd9	0.206411	1.37022	43;784;1061;1527;2849;2850	2.03116	1.17411	0.0303816	0.613561	0.605527	3365;3366;4688;5154;5431;6172	1.18163	0.557926	0.190396	0.883182	0.879794
Chek1	0.0191698	0.759815	314;597;607;3832;5541;5987	1.86344	0.651163	0.0441727	0.641667	0.6104	228;674;2383;5608;5618;5901	1.02396	0.55524	0.266479	0.955173	0.937427
Chrac1	-0.170263	1.12138	2373;3469;4660;4959;5355;6055	0.879687	0.484415	0.359865	0.908439	0.904837	160;860;1256;1555;2746;3842	1.48063	0.960927	0.100507	0.739733	0.730675
Chtop	0.0764057	0.794962	171;454;1486;2145;5447;5489	1.22833	0.681353	0.172149	0.774668	0.773485	726;768;4070;4729;5761;6044	0.869103	0.438184	0.367862	0.948879	0.946264
Chuk	0.0396798	0.569817	485;1448;2903;4033;4142;4591	0.788784	0.488491	0.434048	0.926268	0.918154	1624;2073;2182;3312;4767;5730	0.626072	0.398725	0.595345	1	0.991667
Cir1	-0.0703068	0.65041	1146;2161;2235;4123;5437;6003	0.612043	0.35456	0.610173	0.98484	0.979331	212;778;2092;3980;4054;5069	0.861059	0.557549	0.373855	0.953935	0.95312
Cit	-0.0834749	0.968831	3174;3499;3923;4411;4824;4999	1.0661	0.558355	0.243643	0.838819	0.836148	1216;1391;1804;2292;2716;3041	1.86213	0.830221	0.0442162	0.563246	0.561896
Clns1a	0.107835	0.827114	204;306;2859;3064;3475;4821	1.52693	0.708851	0.0908768	0.680959	0.68009	1394;2740;3151;3356;5909;6011	0.640206	0.39554	0.580692	1	0.991667
Clock	-0.0854598	0.774454	709;3462;4216;4387;4986;5862	0.746888	0.415043	0.473301	0.928656	0.928047	353;1229;1828;1999;2753;5506	1.24384	0.663746	0.166703	0.865392	0.861369
Cop1	-0.23483	1.58942	1489;5052;5248;5486;5643;6085	1.91639	0.731892	0.039244	0.624885	0.6104	130;572;729;967;1163;4726	2.9508	1.36157	0.003843	0.181829	0.181829
Coro2a	0.107112	0.83361	555;1529;1793;1931;3001;4289	1.17751	0.714414	0.192101	0.803333	0.79564	1926;3214;4284;4422;4686;5660	0.706977	0.440991	0.512372	1	0.991667
Crb2	-0.109626	1.01379	3190;3816;3845;4320;4990;5602	1.07538	0.531302	0.238767	0.834173	0.832589	613;1225;1895;2370;2399;3025	1.87588	0.868743	0.0427041	0.556835	0.556574
Crebbp	-0.291484	2.31703	4896;5457;5463;5487;5577;5998	2.69266	1.19262	0.00700966	0.322444	0.317081	217;638;728;752;758;1319	4.03876	1.98434	0.000251208	0.0416	0.0416
Csnk2a1	0.0331033	0.538673	877;1434;2471;3749;4073;4919	0.608967	0.46179	0.613355	0.986132	0.979331	1296;2142;2466;3744;4781;5338	0.56182	0.397887	0.662413	1	0.991667
Csnk2a3	0.000634518	0.452864	1434;2471;4073;4919	0.463149	0.331357	0.728871	0.993424	0.979331	1296;2142;3744;4781	0.514079	0.362333	0.706598	1	0.991667
Cstf1	0.015741	0.503357	1111;1252;2485;2950;4406;5588	0.677348	0.431524	0.542383	0.958576	0.956045	627;1809;3265;3730;4963;5104	0.512763	0.410968	0.707644	1	0.991667
Ctbp1	0.0300879	0.612513	1581;2111;2642;2732;3355;5028	0.897399	0.525009	0.346768	0.895863	0.89547	1187;2860;3483;3573;4104;4634	0.764491	0.48276	0.456337	0.998275	0.991667
Ctbp2	0.0557027	0.747944	1221;2507;2712;2858;3032;3819	1.26853	0.641025	0.158239	0.763977	0.763977	2396;3183;3357;3503;3708;4994	0.737397	0.529456	0.4825	1	0.991667
Ctcf	-0.201708	1.43908	3367;4459;4826;5184;5341;6009	1.30855	0.666126	0.145307	0.744978	0.742098	206;874;1031;1389;1756;2848	2.11031	1.23297	0.0257814	0.435653	0.435653
Ctcfl	0.143888	1.05099	554;1024;1277;1802;3071;3179	1.74648	0.900607	0.0564867	0.619483	0.617078	3036;3144;4413;4938;5191;5661	0.989005	0.517875	0.286649	0.964817	0.937427
Ctr9	-0.0431342	0.645569	217;2166;4290;4372;5290;5698	0.755946	0.437838	0.464604	0.925853	0.924067	517;925;1843;1925;4049;5998	1.1817	0.553337	0.190295	0.885191	0.879794
Cul1	0.0330084	0.545026	550;848;2843;3050;4873;5311	0.808742	0.467247	0.41651	0.920881	0.917846	904;1342;3165;3372;5367;5665	0.577802	0.385106	0.645972	1	0.991667
Cul2	-0.040535	0.611808	1337;1634;2142;4573;5351;5629	0.637316	0.391616	0.583643	0.980235	0.976372	586;864;1642;4073;4581;4878	0.832759	0.524453	0.396407	0.972519	0.967016
Cul3	-0.6127	4.69633	5778;6039;6040;6141;6163;6193	5.05005	2.50089	2.53623e-05	0.014	0.014	22;52;74;175;176;437	6.97362	4.01454	0	0	0
Cul4a	0.0525593	0.720987	177;238;2982;3731;5223;5413	1.72534	0.617926	0.0591606	0.628013	0.627384	802;992;2484;3233;5977;6038	0.724912	0.440895	0.494758	1	0.991667
Cul4b	0.000921321	0.492308	731;1580;2673;3551;5211;5236	0.531991	0.407326	0.691618	0.990761	0.979331	979;1004;2664;3542;4635;5484	0.713318	0.422071	0.505932	1	0.991667
Cul5	-0.221691	1.64961	4401;4440;4709;5321;5481;5990	2.04654	0.792099	0.0295193	0.61105	0.605527	225;734;894;1506;1775;1814	3.2084	1.41322	0.00186353	0.146952	0.146952
Cxxc1	-0.0160738	0.574965	243;3170;3186;3997;4921;5477	0.716235	0.442188	0.503112	0.945691	0.942653	738;1294;2218;3029;3045;5972	1.06322	0.492856	0.245006	0.934862	0.934862
Dapk3	0.214944	1.49328	174;361;537;1200;2491;3609	2.00692	1.2793	0.0323454	0.622837	0.605527	2606;3724;5015;5678;5854;6041	1.12193	0.647161	0.216315	0.911496	0.904605
Daxx	-0.0766166	0.756183	1191;3643;3673;4228;4806;5779	0.82081	0.409798	0.406364	0.921833	0.917846	436;1409;1987;2542;2572;5024	1.36938	0.648099	0.127406	0.808368	0.801068
Ddb1	0.204436	1.58394	152;305;505;650;2092;5340	2.84171	1.35673	0.00478382	0.255548	0.255548	875;4123;5565;5710;5910;6063	1.78607	0.731318	0.0520048	0.615143	0.591885
Ddb2	-0.0285709	0.540559	609;1896;2740;4522;4951;5704	0.523456	0.371677	0.699093	0.990332	0.979331	511;1264;1693;3475;4319;5606	0.807523	0.463411	0.417546	0.982182	0.976091
Ddx1	0.00213117	0.557305	1445;2446;2691;3322;3868;5318	0.674316	0.445395	0.545461	0.957883	0.957883	897;2347;2893;3524;3769;4770	0.712667	0.47774	0.506589	1	0.991667
Ddx10	0.0383485	0.693127	319;946;1562;2248;3382;6102	0.980246	0.59409	0.29199	0.874387	0.874387	113;2833;3967;4653;5269;5896	1.00199	0.462249	0.279069	0.966816	0.937427
Ddx17	-0.0902312	0.838107	1285;1479;4559;5153;5506;5534	0.826195	0.456116	0.401911	0.920559	0.917846	681;709;1062;1656;4736;4930	1.39035	0.718239	0.12185	0.80073	0.797039
Ddx18	-0.00638157	0.509396	957;1164;3257;3425;4307;5792	0.639065	0.401919	0.581877	0.980252	0.976372	423;1908;2790;2958;5051;5258	0.674775	0.436732	0.545066	1	0.991667
Ddx21	0.00362947	0.581201	309;954;1822;5084;5232;5514	0.749565	0.49827	0.470736	0.925817	0.925817	701;983;1131;4393;5261;5906	1.18045	0.479591	0.190728	0.879794	0.879794
Ddx23	0.0415121	0.568985	586;1059;1729;4155;4333;5189	0.790525	0.487767	0.432566	0.925491	0.918154	1026;1882;2060;4486;5156;5629	0.662196	0.385935	0.557993	1	0.991667
Ddx24	0.00283633	0.573158	232;917;2041;2966;5670;5923	0.763278	0.491388	0.457551	0.928559	0.924067	292;545;3249;4174;5298;5983	1.09732	0.462935	0.227739	0.915379	0.913841
Ddx27	-0.145471	1.05566	198;1152;4737;5401;5948;6133	0.924546	0.558707	0.32768	0.88957	0.884237	82;267;814;1478;5063;6017	1.63392	0.904549	0.0721304	0.652721	0.652721
Ddx28	0.214375	1.42684	78;269;1203;1272;2303;3768	1.77838	1.2225	0.0528068	0.620199	0.6104	2447;3912;4943;5012;5946;6137	1.06479	0.581252	0.244314	0.93871	0.934862
Ddx31	-0.0896107	0.822711	1284;1330;2969;5570;5630;5682	0.982944	0.453945	0.290412	0.874404	0.874387	533;585;645;3246;4885;4931	1.79319	0.705025	0.0510326	0.612391	0.591885
Ddx39	0.00708885	0.661048	1639;2453;3618;3723;3797;4121	1.07021	0.541367	0.241461	0.836527	0.836148	2094;2418;2492;2597;3762;4576	0.809551	0.566583	0.415786	0.982228	0.976091
Ddx3x	0.214372	1.4647	79;154;418;2554;3013;3713	2.30628	1.25469	0.0165242	0.506741	0.501309	2502;3202;3661;5797;6061;6136	1.29105	0.592785	0.15074	0.837671	0.825283
Ddx41	0.106402	1.03613	11;166;1885;2643;5604;5642	2.01747	0.8879	0.031651	0.616635	0.605527	573;611;3572;4330;6049;6204	1.01837	0.481224	0.269639	0.954107	0.937427
Ddx42	-0.105353	0.818308	101;889;3570;4848;5716;6183	1.04648	0.492193	0.254053	0.846503	0.841758	32;499;1367;2645;5326;6114	1.52128	0.701414	0.0921606	0.709851	0.709851
Ddx46	0.000850712	0.542469	487;510;2356;3591;5039;5988	1.14428	0.465044	0.206136	0.814706	0.810846	227;1176;2624;3859;5705;5728	0.740004	0.444552	0.480042	1	0.991667
Ddx47	0.245378	1.76444	1;91;282;1390;5038;5733	3.01557	1.51117	0.00336594	0.214385	0.214385	482;1177;4825;5933;6124;6214	1.59363	0.686897	0.0785628	0.670619	0.668357
Ddx49	0.132521	1.02444	280;532;992;1958;2252;5611	1.62132	0.877833	0.0741993	0.65708	0.650378	604;3963;4257;5223;5683;5935	0.978586	0.493719	0.292952	0.958751	0.937427
Ddx50	0.0478677	0.570226	251;2013;2162;3263;4638;5013	0.705078	0.488854	0.514313	0.946336	0.945047	1202;1577;2952;4053;4202;5964	0.561168	0.369418	0.663087	1	0.991667
Ddx51	-0.0973479	0.953538	1947;4042;4212;4744;4909;5364	1.0235	0.51238	0.266867	0.848238	0.84666	851;1306;1471;2003;2173;4268	1.69029	0.817107	0.0638804	0.629679	0.626256
Ddx54	-0.246023	1.62759	213;3823;5342;5876;6060;6139	1.45454	0.783705	0.10621	0.717894	0.715667	76;155;339;873;2392;6002	2.56157	1.39398	0.00909058	0.264105	0.257667
Ddx56	-0.0721135	0.789987	134;2169;4669;5036;5390;5889	0.935454	0.497975	0.320566	0.892198	0.884237	326;825;1179;1546;4046;6081	1.48904	0.677025	0.0985773	0.745406	0.730675
Ddx6	-0.0094402	0.722637	536;549;1565;1769;5786;6092	1.29748	0.61937	0.148577	0.747854	0.747854	123;429;4446;4650;5666;5679	1.27001	0.606991	0.157816	0.840334	0.839689
Dek	-0.0322366	0.666911	849;3510;3623;4021;4564;5122	0.765495	0.452655	0.45551	0.926688	0.924067	1093;1651;2194;2592;2705;5366	1.27606	0.571602	0.155716	0.834518	0.834518
Dhx15	0.017835	0.519676	185;2079;2399;3635;5082;5473	0.813678	0.445568	0.412353	0.922778	0.917846	742;1133;2580;3816;4136;6030	0.65188	0.396266	0.568621	1	0.991667
Dhx29	-0.283173	1.88025	3925;4526;5358;5441;5837;6135	1.59001	0.843026	0.0794275	0.660965	0.653416	80;378;774;857;1689;2290	2.60121	1.61072	0.0083901	0.262151	0.257667
Dhx30	0.0426439	0.586954	710;2128;2606;3077;4089;4507	0.836902	0.503147	0.393	0.912774	0.909421	1708;2126;3138;3609;4087;5505	0.597286	0.414974	0.625635	1	0.991667
Dhx33	-0.134128	0.927694	635;751;2457;5556;5697;6178	0.968635	0.481034	0.2995	0.884086	0.874557	37;518;659;3758;5464;5580	1.76849	0.795058	0.0538225	0.618958	0.591885
Dhx34	0.0620718	0.624729	223;1072;1894;4185;4469;4878	0.746275	0.535557	0.473925	0.928781	0.928047	1337;1746;2030;4321;5143;5992	0.671934	0.366458	0.547822	1	0.991667
Dhx36	0.181122	1.58884	442;507;789;816;929;5348	3.41895	1.36089	0.00112923	0.155833	0.1337	867;5286;5399;5426;5708;5773	2.26769	0.820067	0.0178261	0.364444	0.363878
Dhx57	0.00386814	0.496106	707;1761;2681;3574;3606;5841	0.78064	0.418031	0.441329	0.921614	0.918928	374;2609;2641;3534;4454;5508	0.57714	0.42534	0.646697	1	0.991667
Dhx8	0.0565091	0.651761	996;1796;2683;2886;3371;4396	0.901881	0.558647	0.343729	0.893589	0.893436	1819;2844;3329;3532;4419;5219	0.565757	0.439465	0.658341	1	0.991667
Dhx9	0.104928	0.828008	600;1595;1856;2099;3146;3951	1.17999	0.709621	0.190958	0.802604	0.79564	2264;3069;4116;4359;4620;5615	0.650355	0.446377	0.57015	1	0.991667
Dido1	-0.0609491	0.675957	557;1230;3107;5091;5639;5776	0.656164	0.415069	0.564106	0.967039	0.967039	439;576;1124;3108;4985;5658	1.18675	0.579378	0.188213	0.885455	0.879794
Dmap1	-0.0735442	0.653442	504;1792;3319;3663;5705;6030	0.515368	0.370065	0.705585	0.987699	0.979331	185;510;2552;2896;4423;5711	1.14428	0.560128	0.206136	0.895963	0.895963
Dnajc1	0.0505674	0.586127	717;1483;2575;2638;4177;4853	0.792242	0.502437	0.431057	0.92465	0.918154	1362;2038;3577;3640;4732;5498	0.53531	0.387115	0.688576	1	0.991667
Dnajc2	0.221147	1.64254	201;321;374;715;2411;4305	2.68634	1.40689	0.00708454	0.317081	0.317081	1910;3804;5500;5841;5894;6014	1.67701	0.741311	0.0658901	0.630717	0.62992
Dnd1	0.0187358	0.504482	412;2105;2277;3162;4181;5730	0.61512	0.432507	0.606964	0.982534	0.979331	485;2034;3053;3938;4110;5803	0.589821	0.393005	0.633475	1	0.991667
Dnmt1	-0.0292065	0.737008	7;1040;2947;4728;5654;6134	2.17257	0.631887	0.0224384	0.580594	0.549222	81;561;1487;3268;5175;6208	1.13523	0.588257	0.210344	0.900078	0.900078
Dnmt3a	-0.0295411	0.61984	1801;2156;2746;4398;4642;5294	0.522859	0.410264	0.699598	0.9902	0.979331	921;1573;1817;3469;4059;4414	0.891234	0.531315	0.351345	0.938432	0.937427
Dnmt3b	0.039168	0.686075	267;324;3901;3996;4107;5581	1.48259	0.588037	0.100133	0.693808	0.691286	634;2108;2219;2314;5891;5948	0.944554	0.460885	0.314579	0.964707	0.937427
Dnmt3l	-0.0279691	0.572286	1215;1487;2992;4474;5047;5398	0.541172	0.388302	0.68303	0.992191	0.979331	817;1168;1741;3223;4728;5000	0.785004	0.490585	0.437493	0.988387	0.986033
Dnttip2	0.030813	0.557573	589;796;3061;3940;4667;4943	0.846954	0.477998	0.385017	0.912143	0.909421	1272;1548;2275;3154;5419;5626	0.617247	0.403911	0.604711	1	0.991667
Dot1l	0.0870347	0.959007	1714;1920;2366;2395;2577;2958	1.93424	0.821793	0.0379614	0.63499	0.6104	3257;3638;3820;3849;4295;4501	1.115	0.625558	0.219552	0.906678	0.904605
Dpf1	0.0373177	0.565349	749;1442;1984;2719;3672;5707	0.759605	0.484625	0.460917	0.926308	0.924067	508;2543;3496;4231;4773;5466	0.525735	0.397425	0.69713	1	0.991667
Dpf2	0.0495562	0.637639	1199;1926;2360;2532;3329;4923	0.910361	0.546537	0.337719	0.891965	0.890742	1292;2886;3683;3855;4289;5016	0.57481	0.446309	0.649152	1	0.991667
Dpf3	0.201544	1.37721	46;237;613;1181;3796;4720	1.89148	1.17991	0.0414444	0.618306	0.6104	1495;2419;5034;5602;5978;6169	1.13781	0.548371	0.209058	0.906283	0.899207
Dppa3	-0.0608264	0.883627	2955;3147;3869;4194;4673;4727	0.946097	0.545069	0.313708	0.889555	0.884237	1488;1542;2021;2346;3068;3260	1.68092	0.757243	0.0650459	0.626256	0.626256
Dppa3-ps	-0.0350133	0.647094	2955;3147;3869;4673	0.561614	0.384263	0.66261	0.992118	0.979331	1542;2346;3068;3260	1.12061	0.51765	0.216779	0.908825	0.904605
Dpy30	-0.229342	1.19503	1212;3800;4473;4838;5446;6203	0.89362	0.438666	0.349498	0.898708	0.898708	12;769;1377;1742;2415;5003	1.94024	1.02411	0.0375254	0.535707	0.535345
Dr1	-0.412617	3.20309	4977;5729;5933;6008;6025;6059	3.32501	1.66495	0.001407	0.137059	0.1337	156;190;207;282;486;1238	4.79089	2.74161	5.19324e-05	0.0122857	0.0122857
Dtx3l	0.0608218	0.664896	826;1005;1192;3778;4543;4630	1.12774	0.569906	0.213655	0.817118	0.81509	1585;1672;2437;5023;5210;5389	0.62846	0.418038	0.592739	1	0.991667
Dzip3	0.102298	0.929697	27;566;722;4192;4233;5724	1.66439	0.796786	0.0674589	0.645734	0.643587	491;1982;2023;5493;5649;6188	0.909027	0.435857	0.338543	0.94541	0.937427
E230016M11Rik	-0.31075	1.5569	3493;4739;6032;6081	0.96997	0.487594	0.298419	0.882468	0.874557	134;183;1476;2722	2.30965	1.24495	0.0164215	0.353169	0.347646
E2f6	0.0123536	0.493727	720;2061;2558;3859;4579;5032	0.549784	0.423294	0.674599	0.991248	0.979331	1183;1636;2356;3657;4154;5495	0.583585	0.415821	0.639999	1	0.991667
Eed	-0.146309	1.20869	3600;3792;4494;4911;5023;5735	1.33925	0.603372	0.136083	0.738866	0.736395	480;1192;1304;1721;2423;2615	2.2554	1.03566	0.0182754	0.364627	0.364627
Eef1akmt3	0.165349	1.22314	497;1081;1148;1579;2088;3151	1.76954	1.04803	0.0537114	0.617681	0.6104	3064;4127;4636;5067;5134;5718	1.07478	0.600657	0.239266	0.938919	0.934628
Eef1aknmt	-0.0282813	0.595937	765;2988;3463;3628;4871;5361	0.598718	0.408398	0.624232	0.988268	0.979331	854;1344;2587;2752;3227;5450	0.962846	0.510824	0.302837	0.960724	0.937427
Ehmt1	-0.17957	1.30785	3752;3999;4563;4631;5212;6028	1.45137	0.610881	0.106757	0.718659	0.715667	187;1003;1584;1652;2216;2463	2.41144	1.12063	0.0131981	0.316754	0.316754
Ehmt2	-0.209713	1.30825	1096;1253;5483;5531;5765;6164	1.65039	0.592011	0.0695604	0.650802	0.643587	51;450;684;732;4962;5119	2.64821	1.12082	0.00763043	0.25272	0.25272
Eid1	0.116044	0.811446	227;842;1882;2143;3889;4428	1.04065	0.695477	0.257112	0.848163	0.841758	1787;2326;4072;4333;5373;5988	0.637316	0.374238	0.583643	1	0.991667
Eid2	-0.102249	0.937939	411;433;1665;5640;5678;6169	1.26315	0.599485	0.160169	0.768812	0.768812	46;537;575;4550;5782;5804	1.92659	0.803821	0.0384698	0.535345	0.535345
Eid2b	0.13609	1.03239	616;955;1218;2748;2876;2906	1.98045	0.884678	0.034006	0.605527	0.605527	3309;3339;3467;4997;5260;5599	1.14665	0.522806	0.204979	0.898005	0.893705
Eif4a-ps4	-0.272495	1.17569	5088;5761	0.527627	0.197791	0.695458	0.988565	0.979331	454;1127	1.48289	0.78371	0.100071	0.746477	0.730675
Eif4a1	-0.00662297	0.565531	158;795;3683;4662;5088;5761	0.87249	0.484862	0.365251	0.912302	0.909421	454;1127;1553;2532;5420;6057	0.880246	0.482093	0.359226	0.941263	0.939953
Eif4a2	0.0690301	0.707822	569;696;1029;2633;4770;5445	1.27771	0.60666	0.155157	0.764702	0.761871	770;1445;3582;5186;5519;5646	0.70082	0.412006	0.518417	1	0.991667
Eif4a3	-0.209051	1.56125	4215;4632;4685;4937;4983;6073	1.85321	0.75213	0.0450217	0.631831	0.6104	142;1232;1278;1530;1583;2000	2.95405	1.33758	0.00382126	0.191758	0.181829
Elp2	0.0707596	0.849065	104;528;660;3328;5369;5773	1.76675	0.727658	0.0540761	0.617586	0.6104	442;846;2887;5555;5687;6111	0.967629	0.478414	0.299994	0.960909	0.937427
Elp3	0.00120708	0.882554	16;225;3265;5072;5645;6020	1.8167	0.756422	0.0488273	0.626806	0.6104	195;570;1143;2950;5990;6199	1.16978	0.636939	0.195367	0.886378	0.885459
Elp4	0.0886074	0.736854	606;649;1965;2006;4223;4914	1.12666	0.63154	0.214109	0.81509	0.81509	1301;1992;4209;4250;5566;5609	0.680318	0.395552	0.539418	1	0.991667
Elp5	-0.0627558	0.708612	691;753;3847;3896;5852;5892	0.881458	0.444478	0.358412	0.908928	0.904837	323;363;2319;2368;5462;5524	1.3954	0.607357	0.120772	0.799992	0.797039
Elp6	-0.0295363	0.576391	1346;1574;2064;4514;4769;5780	0.660924	0.389283	0.559287	0.967795	0.966815	435;1446;1701;4151;4641;4869	0.803689	0.494125	0.420845	0.980197	0.976091
Eny2	0.135351	0.912314	17;1254;1941;2580;3149;5026	1.79072	0.781974	0.0515857	0.614576	0.6104	1189;3066;3635;4274;4961;6198	0.618853	0.351656	0.602958	1	0.991667
Ep300	-0.501726	4.05537	5655;5999;6002;6053;6076;6130	4.69822	2.19118	5.91787e-05	0.0196	0.0196	85;139;162;213;216;560	6.5318	3.46881	0	0	0
Ep400	0.0136719	0.547987	1615;2151;2421;2862;4332;5079	0.70685	0.467249	0.512444	0.947107	0.945047	1136;1883;3353;3794;4064;4600	0.783681	0.469761	0.438506	0.986639	0.986033
Epc1	0.0173151	0.535117	1276;1957;2587;2848;3694;5494	0.743191	0.458716	0.476843	0.930097	0.930097	721;2521;3367;3628;4258;4939	0.598393	0.444879	0.6245	1	0.991667
Epc2	-0.0453654	0.621068	1258;2405;3594;4168;4523;5648	0.537559	0.378748	0.686437	0.99192	0.979331	567;1692;2047;2621;3810;4957	0.799354	0.532368	0.424727	0.979593	0.976091
Erbb4	-0.0904809	0.766457	1324;1960;4261;4414;5561;5783	0.698556	0.388515	0.520693	0.949634	0.949634	432;654;1801;1954;4255;4891	1.16162	0.656906	0.198694	0.894125	0.893705
Ercc6	-0.0408288	0.660199	1854;2497;3259;3308;5222;5305	0.579283	0.417302	0.644476	0.990949	0.979331	910;993;2907;2956;3718;4361	0.922711	0.565887	0.329017	0.960938	0.937427
Esco1	0.0045598	0.461658	475;1577;2622;3798;4708;5626	0.53729	0.395834	0.686729	0.990613	0.979331	589;1507;2417;3593;4638;5740	0.571046	0.393475	0.652995	1	0.991667
Esco2	0.236663	1.63425	9;916;1032;1066;1373;4169	2.60879	1.40019	0.0082657	0.350974	0.34445	2046;4842;5149;5183;5299;6206	1.66467	0.65436	0.0674203	0.63078	0.63078
Etfbkmt	0.127362	0.907609	328;1002;1027;1990;3023;4898	1.27974	0.777796	0.154326	0.762878	0.761871	1317;3192;4225;5188;5213;5887	0.701842	0.427485	0.517315	1	0.991667
Exosc1	-0.180353	1.02254	653;890;2821;3714;6098;6205	0.991681	0.463198	0.285187	0.869742	0.867413	10;117;2501;3394;5325;5562	2.3073	0.87613	0.016506	0.350436	0.347646
Exosc2	-0.36781	2.12713	3562;3892;5421;5922;5954;6206	1.5635	0.867416	0.0838816	0.658332	0.654884	9;261;293;794;2323;2653	2.74141	1.82198	0.00594807	0.22907	0.22907
Exosc3	0.279659	1.77479	4;53;1312;1774;2775;3248	2.97698	1.51989	0.0036872	0.226148	0.226148	2967;3440;4441;4903;6162;6211	1.31746	0.623911	0.142579	0.831373	0.825283
Exosc4	0.052355	0.6399	164;1195;3652;3801;4460;4540	0.858456	0.548564	0.376104	0.915924	0.909421	1675;1755;2414;2563;5020;6051	0.824318	0.405523	0.403507	0.967016	0.967016
Exosc5	-0.0914761	0.778185	2045;2198;3089;4341;5693;5769	0.571223	0.390312	0.652857	0.989142	0.979331	446;522;1874;3126;4017;4170	1.12774	0.666963	0.213728	0.907523	0.904605
Exosc6	-0.203279	1.45751	2956;4754;4851;5261;5309;6010	1.57261	0.678066	0.0824662	0.653416	0.653416	205;906;954;1364;1461;3259	2.48186	1.24872	0.0110676	0.295613	0.295613
Exosc7	-0.235995	1.75791	130;5238;5296;5743;5961;6116	2.18801	0.92562	0.0214143	0.562889	0.549222	99;254;472;919;977;6085	3.31352	1.50564	0.00149758	0.145882	0.139158
Exosc8	-0.0352807	0.649194	2141;2409;2872;3964;4239;5532	0.601888	0.421989	0.620896	0.989609	0.979331	683;1976;2251;3343;3806;4074	1.1001	0.556465	0.22647	0.914717	0.913841
Exosc9	0.039775	0.682565	176;891;973;3101;5240;5938	1.33662	0.58507	0.136827	0.738065	0.736395	277;975;3114;5242;5324;6039	0.730816	0.444686	0.489046	1	0.991667
Eya1	-0.046556	0.734692	484;2980;4407;4801;4954;4996	0.755894	0.48472	0.464829	0.925188	0.924067	1219;1261;1414;1808;3235;5731	1.26725	0.629641	0.158607	0.84184	0.839689
Eya2	0.00493828	0.57327	230;2978;3705;4061;4211;5105	0.73539	0.491459	0.484482	0.935084	0.935084	1110;2004;2154;2510;3237;5985	0.957584	0.48826	0.306366	0.960875	0.937427
Eya3	0.0981221	0.841965	1143;1301;1630;2138;3555;3664	1.37649	0.721564	0.125798	0.730954	0.726459	2551;2660;4077;4585;4914;5072	0.756181	0.48307	0.464315	1	0.991667
Eya4	0.0734111	0.684498	625;928;1132;3043;4472;4966	1.17955	0.586693	0.191072	0.801053	0.79564	1249;1743;3172;5083;5287;5590	0.652731	0.391285	0.567762	1	0.991667
Ezh1	0.0181819	0.681313	259;574;984;3560;4740;6114	1.32471	0.583967	0.140447	0.738349	0.738349	101;1475;2655;5231;5641;5956	1.04648	0.489377	0.254053	0.94542	0.937427
Ezh2	-0.0868952	0.745824	1224;2778;3217;4942;5317;5797	0.599551	0.377792	0.623333	0.988736	0.979331	418;898;1273;2998;3437;4991	1.06327	0.639236	0.24494	0.936767	0.934862
Fbl	-0.0109974	0.544245	1127;1295;2311;4365;5200;5276	0.593602	0.413754	0.62944	0.988011	0.979331	939;1015;1850;3904;4920;5088	0.738028	0.466569	0.481912	1	0.991667
Fbrs	0.103822	0.798163	521;758;1389;2300;4299;4304	0.980599	0.684068	0.291819	0.875457	0.874387	1911;1916;3915;4826;5457;5694	0.596385	0.403652	0.626543	1	0.991667
Fbrsl1	0.0517374	0.705689	398;548;1000;2811;4825;5919	1.30768	0.604831	0.145463	0.743475	0.742098	296;1390;3404;5215;5667;5817	0.715988	0.442406	0.503413	1	0.991667
Fbxl19	0.0414974	0.654306	296;1169;1627;1964;5405;5681	1.15479	0.560863	0.201751	0.803125	0.802508	534;810;4251;4588;5046;5919	0.836305	0.436585	0.393678	0.97158	0.967016
Fbxw9	0.152296	1.08286	272;793;1033;1223;3907;3926	1.83806	0.927881	0.0465604	0.621806	0.6104	2289;2308;4992;5182;5422;5943	1.10316	0.49638	0.225087	0.915833	0.913841
Foxa1	0.0702911	0.630278	310;1063;1757;2768;4609;5156	0.777754	0.540286	0.443926	0.918928	0.918928	1059;1606;3447;4458;5152;5905	0.520846	0.351855	0.701198	1	0.991667
Foxo1	0.0552832	0.711302	1650;1803;2463;2706;3029;4389	1.07247	0.609633	0.240174	0.833811	0.833811	1826;3186;3509;3752;4412;4565	0.803583	0.500092	0.420942	0.977672	0.976091
Foxp1	0.0910912	0.725473	195;1795;2260;2998;3229;4512	0.961792	0.621839	0.303665	0.874557	0.874557	1703;2986;3217;3955;4420;6020	0.598223	0.37943	0.624731	1	0.991667
Foxp2	0.0200668	0.570886	1401;2377;2676;2758;3871;5017	0.744612	0.489357	0.475492	0.929651	0.929651	1198;2344;3457;3539;3838;4814	0.685705	0.471694	0.533859	1	0.991667
Foxp3	0.0859561	0.786193	726;1950;2272;2623;3154;3625	1.40438	0.673804	0.118384	0.731507	0.722015	2590;3061;3592;3943;4265;5489	0.772836	0.468853	0.448399	0.992711	0.991081
Foxp4	0.020775	0.546494	396;2724;3099;3123;4160;5185	0.62565	0.468498	0.595865	0.97795	0.976372	1030;2055;3092;3116;3491;5819	0.832279	0.430665	0.396856	0.97218	0.967016
Gadd45a	-0.296438	1.88692	3493;4015;4739;5989;6032;6081	1.77035	0.835041	0.0536377	0.621147	0.6104	134;183;226;1476;2200;2722	3.06503	1.61601	0.00262802	0.161185	0.1605
Gadd45b	0.027348	0.5654	457;1210;1702;2529;4447;5950	0.839466	0.484683	0.390924	0.913075	0.909421	265;1768;3686;4513;5005;5758	0.686611	0.405885	0.532861	1	0.991667
Gadd45g	0.0303958	0.644268	1387;1419;1457;2815;3021;5868	1.07712	0.552197	0.237902	0.834674	0.832589	347;3194;3400;4758;4796;4828	0.657624	0.486234	0.562624	1	0.991667
Gatad1	-0.11827	0.911791	1266;3090;4409;5193;5264;5821	0.756746	0.437434	0.463802	0.927604	0.924067	394;951;1022;1806;3125;4949	1.28484	0.781366	0.152919	0.827562	0.825283
Gatad2a	-0.105127	0.914204	2845;2990;4009;4423;4425;5932	0.890489	0.460795	0.351819	0.900482	0.900482	283;1790;1792;2206;3225;3370	1.59445	0.783479	0.0784372	0.673016	0.668357
Gatad2b	-0.117221	0.96624	2760;3633;3784;4594;4876;5865	0.849555	0.473828	0.38293	0.913735	0.909421	350;1339;1621;2431;2582;3455	1.52954	0.828041	0.0903841	0.706019	0.701738
Gfi1	0.107693	0.85189	934;962;1625;2174;2953;4243	1.11741	0.730066	0.218366	0.818131	0.81742	1972;3262;4041;4590;5253;5281	0.676703	0.455933	0.543086	1	0.991667
Gfi1b	0.0576942	0.640548	1016;1283;1320;3369;3605;5177	1.02848	0.549033	0.263906	0.845315	0.841758	1038;2610;2846;4895;4932;5199	0.584636	0.413203	0.638947	1	0.991667
Glyr1	-0.0198426	0.709018	2331;2926;3158;3644;3699;5066	0.741117	0.507053	0.478929	0.931969	0.931115	1149;2516;2571;3057;3289;3884	1.22455	0.607687	0.173704	0.866428	0.861369
Gm10093	0.265022	1.13561	98;2581	1.50802	0.757062	0.0946908	0.687754	0.6834	3634;6117	0.313708	0.109124	0.791543	1	0.991667
Gm10257	-0.135948	0.608112	4683	0.122847	0.0614235	0.900615	0.983136	0.982372	1532	0.608112	0.304056	0.614266	1	0.991667
Gm10706	0.0372316	0.333677	2882	0.333677	0.166839	0.781958	0.98249	0.979331	3333	0.270536	0.135268	0.813319	1	0.991667
Gm11914	-0.186155	0.791917	3324;5815	0.303154	0.120266	0.79711	0.989516	0.979331	400;2891	0.919177	0.527941	0.331226	0.958934	0.937427
Gm12261	0.0460407	0.349952	2776	0.349952	0.174976	0.774494	0.984315	0.979331	3439	0.256939	0.12847	0.820068	1	0.991667
Gm12355	0.00753996	0.516921	125;2951;4316;5762	1.12088	0.413623	0.216688	0.817394	0.817394	453;1899;3264;6090	0.633833	0.359505	0.587204	1	0.991667
Gm12387	-0.103286	0.535213	4403	0.149623	0.0748113	0.882374	0.983981	0.982372	1812	0.535213	0.267607	0.688693	1	0.991667
Gm12463	-0.202989	0.921071	953;5226;6120	0.481763	0.24338	0.722428	0.993638	0.979331	95;989;5262	1.35191	0.690771	0.132368	0.802938	0.802938
Gm12657	-0.273953	1.00869	3597;6042	0.311968	0.112116	0.792432	0.98741	0.979331	173;2618	1.26656	0.672454	0.158855	0.84046	0.839689
Gm12722	0.0661387	0.387854	2544	0.387854	0.193927	0.7581	0.989294	0.979331	3671	0.228587	0.114293	0.835144	1	0.991667
Gm12957	0.049098	0.542518	980;1157;4268;4676	0.860881	0.434035	0.374116	0.917831	0.909421	1539;1947;5058;5235	0.556357	0.325109	0.668065	1	0.991667
Gm13007	-0.258898	0.90072	5434	0.0582516	0.0291258	0.949182	0.989827	0.989827	781	0.90072	0.45036	0.344434	0.944341	0.937427
Gm13127	0.0448273	0.469468	2564;3028	0.624431	0.312977	0.597091	0.978024	0.976372	3187;3651	0.461919	0.254412	0.729331	1	0.991667
Gm13140	-0.0542933	0.428445	3898	0.202529	0.101265	0.849849	0.980732	0.980201	2317	0.428445	0.214223	0.74179	1	0.991667
Gm13410	0.292086	1.0538	549	1.0538	0.526899	0.250229	0.845673	0.841758	5666	0.0400947	0.0200473	0.964342	0.993128	0.992184
Gm13427	-0.443567	1.37673	5954	0.0185624	0.00928121	0.982926	0.997993	0.996065	261	1.37673	0.688365	0.125711	0.800685	0.800685
Gm14127	0.642159	2.64724	14	2.64724	1.32362	0.0077029	0.335684	0.335684	6201	0.000909518	0.000454759	0.999116	0.999116	0.999116
Gm14176	-0.179087	0.909193	3291;4857;5838	0.454007	0.233251	0.732138	0.993787	0.979331	377;1358;2924	0.982182	0.681842	0.290703	0.957066	0.937427
Gm14292	0.224246	0.958121	156;3093	1.31026	0.638747	0.144529	0.745607	0.742098	3122;6059	0.30104	0.10766	0.798504	1	0.991667
Gm14674	-0.140844	0.744566	4109;5158	0.348724	0.170168	0.775012	0.981959	0.979331	1057;2106	0.939826	0.496355	0.317722	0.963641	0.937427
Gm14853	-0.22104	0.802145	5235	0.0744546	0.0372273	0.936176	0.986201	0.985481	980	0.802145	0.401073	0.42213	0.97769	0.976091
Gm15753	-0.339714	1.10141	5723	0.0357475	0.0178738	0.968031	0.994454	0.993376	492	1.10141	0.550703	0.225967	0.917162	0.913841
Gm15927	0.173288	0.931614	573;755;3515	1.40999	0.698612	0.116796	0.735414	0.722015	2700;5460;5642	0.551236	0.264269	0.673164	1	0.991667
Gm16433	-0.0336544	0.599568	3257;3425;4307	0.477589	0.328571	0.723906	0.992374	0.979331	1908;2790;2958	0.967119	0.449659	0.300278	0.958112	0.937427
Gm16861	-0.0396457	0.473567	2921;4484	0.302589	0.195334	0.797428	0.989169	0.979331	1731;3294	0.551295	0.315714	0.673164	1	0.991667
Gm19209	0.242712	1.03739	322;1819	1.06708	0.691557	0.243007	0.840125	0.836148	4396;5893	0.383061	0.143044	0.760068	1	0.991667
Gm20147	0.175209	0.860398	125;4316	1.40426	0.573612	0.118391	0.728833	0.722015	1899;6090	0.372207	0.129905	0.764568	1	0.991667
Gm20517	-0.108477	0.854146	2562;2709;3549;4441;5157;5943	0.760843	0.405915	0.459814	0.926341	0.924067	272;1058;1774;2666;3506;3653	1.38433	0.732053	0.123614	0.799625	0.798736
Gm2058	-0.215138	1.07176	2545;4689;4813;6131	0.686634	0.311965	0.532771	0.95587	0.95587	84;1402;1526;3670	1.34977	0.857309	0.133158	0.804781	0.804781
Gm2059	-0.995535	2.71419	6203	0.000769468	0.000384734	0.999227	0.999227	0.999227	12	2.71419	1.3571	0.00675966	0.248756	0.242327
Gm20605	-0.0452577	0.689005	1961;2514;3700;4097;4599;5289	0.553497	0.424803	0.670973	0.989432	0.979331	926;1616;2118;2515;3701;4254	0.987443	0.590553	0.287611	0.964138	0.937427
Gm2065	-0.023182	0.37292	3582	0.239246	0.119623	0.829523	0.982611	0.979331	2633	0.37292	0.18646	0.764304	1	0.991667
Gm20716	-0.0567312	0.622166	965;1093;3183;4711;4776;6015	0.669477	0.374878	0.550424	0.962515	0.962208	200;1439;1504;3032;5122;5250	0.908391	0.533355	0.339036	0.943603	0.937427
Gm20784	0.0705252	0.396649	2493	0.396649	0.198324	0.754461	0.987658	0.979331	3722	0.222595	0.111297	0.838472	1	0.991667
Gm21378	0.0705252	0.396649	2493	0.396649	0.198324	0.754461	0.987658	0.979331	3722	0.222595	0.111297	0.838472	1	0.991667
Gm2710	0.321935	1.17637	414	1.17637	0.588185	0.192603	0.799373	0.79564	5801	0.0298684	0.0149342	0.97319	0.994202	0.992184
Gm28042	0.0413629	0.571557	1004;1731;2299;3148;3592;5070	0.786762	0.489943	0.435947	0.923182	0.918154	1145;2623;3067;3916;4484;5211	0.525678	0.409167	0.697223	1	0.991667
Gm28043	-0.259493	1.31518	1280;3361;3553;5412;5959;6207	0.842356	0.456586	0.38879	0.911949	0.909421	8;256;803;2662;2854;4935	2.11493	1.12696	0.0255012	0.435361	0.435361
Gm3160	-0.606923	1.76399	6108	0.00747222	0.00373611	0.993058	0.996065	0.996065	107	1.76399	0.881994	0.0546969	0.592013	0.591885
Gm34939	-0.467264	1.43164	5985	0.0163071	0.00815355	0.985042	0.998305	0.996065	230	1.43164	0.715822	0.11156	0.769767	0.765457
Gm4204	0.119676	0.749688	595;1818;2487;3400	1.04757	0.599714	0.253207	0.845383	0.841758	2815;3728;4397;5620	0.527893	0.309283	0.695238	1	0.991667
Gm42162	0.0917413	0.437728	2268	0.437728	0.218864	0.738285	0.986764	0.979331	3947	0.197104	0.0985521	0.853014	1	0.991667
Gm45734	-0.135948	0.608112	4683	0.122847	0.0614235	0.900615	0.983136	0.982372	1532	0.608112	0.304056	0.614266	1	0.991667
Gm45935	0.0413417	0.577955	901;1162;2340;2355;4053;5520	0.923223	0.495421	0.328733	0.888062	0.884237	695;2162;3860;3875;5053;5314	0.584016	0.39982	0.639563	1	0.991667
Gm46174	-0.256196	0.960999	1417;6152	0.453373	0.154028	0.732366	0.99247	0.979331	63;4798	1.69743	0.640683	0.0631111	0.637268	0.626256
Gm5513	-0.351104	1.13632	5761	0.0328734	0.0164367	0.970581	0.993376	0.993376	454	1.13632	0.568158	0.209598	0.899207	0.899207
Gm5521	-0.0743389	0.707393	3426;4328;4508	0.47762	0.312664	0.723831	0.993094	0.979331	1707;1887;2789	1.04377	0.530503	0.255377	0.937703	0.937427
Gm5527	-0.606923	1.76399	6108	0.00747222	0.00373611	0.993058	0.996065	0.996065	107	1.76399	0.881994	0.0546969	0.592013	0.591885
Gm5842	-0.606923	1.76399	6108	0.00747222	0.00373611	0.993058	0.996065	0.996065	107	1.76399	0.881994	0.0546969	0.592013	0.591885
Gm5931	-0.188848	0.798989	3291;5838	0.302556	0.118923	0.797492	0.988507	0.979331	377;2924	0.943181	0.532656	0.315489	0.962155	0.937427
Gm6039	-0.347434	1.12499	5749	0.0337789	0.0168895	0.969786	0.993791	0.993376	466	1.12499	0.562493	0.215068	0.910875	0.904605
Gm6206	-0.316386	1.03598	5643	0.0418612	0.0209306	0.962839	0.993434	0.993376	572	1.03598	0.517988	0.259671	0.94509	0.937427
Gm6365	-0.274248	0.932435	5489	0.053878	0.026939	0.952795	0.991098	0.99056	726	0.932435	0.466217	0.322675	0.959336	0.937427
Gm6421	-0.0939494	0.719043	486;2475;3597;4683;5419;6042	0.537965	0.366671	0.686066	0.993117	0.979331	173;796;1532;2618;3740;5729	0.892127	0.616323	0.350779	0.938433	0.937427
Gm6477	-0.156149	0.650982	4827	0.109694	0.054847	0.909868	0.982871	0.982567	1388	0.650982	0.325491	0.569568	1	0.991667
Gm6485	0.306795	1.33752	129;1417	1.39086	0.891622	0.121725	0.727711	0.725523	4798;6086	0.453589	0.157223	0.732302	1	0.991667
Gm6722	0.0450529	0.348858	2783	0.348858	0.174429	0.775007	0.982704	0.979331	3432	0.257824	0.128912	0.819589	1	0.991667
Gm6909	0.135088	0.539549	1794	0.539549	0.269774	0.684572	0.99356	0.979331	4421	0.147851	0.0739254	0.883543	1	0.991667
Gm6992	0.072112	0.398395	2483	0.398395	0.199197	0.753763	0.98909	0.979331	3732	0.22143	0.110715	0.839092	1	0.991667
Gm7151	-0.204058	0.92289	975;5226;6120	0.475491	0.241812	0.724606	0.992513	0.979331	95;989;5240	1.35191	0.692135	0.132368	0.802938	0.802938
Gm7203	0.222217	0.804367	975	0.804367	0.402183	0.420227	0.919281	0.918154	5240	0.07404	0.03702	0.936504	0.99669	0.992184
Gm7259	0.0660272	0.387683	2545	0.387683	0.193842	0.758184	0.988624	0.979331	3670	0.228705	0.114353	0.835074	1	0.991667
Gm7390	0.0798736	0.476303	1214;3701	0.502524	0.317543	0.715438	0.993931	0.979331	2514;5001	0.317146	0.168591	0.789822	1	0.991667
Gm7488	0.0316173	0.651444	21;2219;3509;4400;5914	1.77806	0.542986	0.0528176	0.615958	0.6104	301;1815;2706;3996;6194	0.702088	0.387218	0.517048	1	0.991667
Gm8036	0.255108	0.933633	724	0.933633	0.466816	0.321726	0.890933	0.884237	5491	0.0537198	0.0268599	0.952952	0.996268	0.992184
Gm8203	-0.106923	0.586828	2783;5434	0.305779	0.140761	0.795708	0.988516	0.979331	781;3432	0.658022	0.391223	0.562205	1	0.991667
Gm8319	-0.606923	1.76399	6108	0.00747222	0.00373611	0.993058	0.996065	0.996065	107	1.76399	0.881994	0.0546969	0.592013	0.591885
Gm8396	-0.0135709	0.35262	3456	0.254798	0.127399	0.821248	0.983359	0.979331	2759	0.35262	0.17631	0.773286	1	0.991667
Gm8524	-0.523685	1.55533	6042	0.0121905	0.00609526	0.988737	1	0.996065	173	1.55533	0.777663	0.0855229	0.684184	0.681029
Gm8930	-0.0174166	0.361686	3513	0.247693	0.123847	0.824993	0.982869	0.979331	2702	0.361686	0.180843	0.769271	1	0.991667
Gm9144	-0.262305	1.08022	4574;5890	0.410572	0.152361	0.748801	0.988847	0.979331	325;1641	1.15653	0.720104	0.200883	0.894253	0.893705
Gm9214	0.00412322	0.322373	3257	0.280553	0.140277	0.808243	0.983431	0.979331	2958	0.322373	0.161187	0.787298	1	0.991667
Gm9531	-0.0725495	0.503972	2268;5334	0.333912	0.155516	0.781821	0.983065	0.979331	881;3947	0.613765	0.335991	0.608411	1	0.991667
Gm9761	-0.0271037	0.474641	470;2951;4316;5762	0.621684	0.313784	0.599966	0.976936	0.976936	453;1899;3264;5745	0.633833	0.379767	0.587204	1	0.991667
Gse1	0.0103669	0.610271	1733;1922;3364;3736;3981;4352	0.928094	0.507731	0.32535	0.89202	0.884237	1863;2234;2479;2851;4293;4482	0.851396	0.523098	0.381614	0.958956	0.958699
Gtf2i	-0.0922366	0.677591	1177;1430;2341;4049;5018;6166	0.586851	0.349617	0.63661	0.990814	0.979331	49;1197;2166;3874;4785;5038	1.34221	0.580895	0.135361	0.81512	0.814345
Gtf3c2	0.180533	1.31615	366;940;951;1267;2534;2864	2.01839	1.12768	0.0315483	0.621952	0.605527	3351;3681;4948;5264;5275;5849	1.1728	0.625504	0.193911	0.882187	0.882187
Gtf3c4	0.153539	1.04287	141;582;2370;2478;2598;3502	1.49433	0.893712	0.0975942	0.684814	0.684814	2713;3617;3737;3845;5633;6074	0.827666	0.459438	0.400796	0.971769	0.967016
H1f0	-0.043973	0.856134	2986;3246;3680;3844;3972;4854	0.962319	0.565667	0.303395	0.876827	0.874557	1361;2243;2371;2535;2969;3229	1.70582	0.73369	0.0617585	0.627436	0.626256
H1f1	-0.0543702	0.719181	2075;2479;3614;4467;4732;5288	0.580581	0.426184	0.643077	0.991561	0.979331	927;1483;1748;2601;3736;4140	1.05823	0.616402	0.247686	0.942915	0.937427
H1f10	-0.0242032	0.554023	1103;2266;3206;3333;4650;5662	0.573708	0.379749	0.650319	0.991646	0.979331	553;1565;2882;3009;3949;5112	0.658791	0.474943	0.561478	1	0.991667
H1f2	-0.115268	0.714251	116;1677;3393;4058;4552;5215;5930	0.932918	0.503915	0.3221	0.888997	0.884237	285;1000;1663;2157;2822;4538;6099	0.917683	0.612279	0.332508	0.955962	0.937427
H1f3	-0.161932	0.803437	146;983;1678;3209;3790;5215;5930;5956	0.798208	0.536658	0.425586	0.922474	0.918154	259;285;1000;2425;3006;4537;5232;6069	1.35223	0.68868	0.132291	0.808391	0.802938
H1f4	-0.210511	1.15468	2109;2506;3209;5215;5277;5921;6000	1.14182	0.613765	0.207118	0.810846	0.810846	215;294;938;1000;3006;3709;4106	1.85802	0.989358	0.0445725	0.56345	0.561896
H1f5	0.00653415	0.600826	690;1053;1746;3004;3209;4483;5332	0.743842	0.515111	0.47621	0.929958	0.929958	883;1732;3006;3211;4469;5162;5525	0.550626	0.415122	0.673758	1	0.991667
H1f6	-0.0676792	0.670672	956;2679;3292;3402;5584;5842	0.559168	0.372852	0.665157	0.992342	0.979331	373;631;2813;2923;3536;5259	0.996607	0.574869	0.282156	0.967391	0.937427
H1f7	-0.146458	0.919147	1413;2391;3820;3989;5966;6084	0.709208	0.392656	0.510085	0.945913	0.945047	131;249;2226;2395;3824;4802	1.6893	0.787667	0.0640978	0.628083	0.626256
H1f8	0.0624853	0.643151	355;792;1309;3388;4345;5544	1.03646	0.551295	0.259483	0.847542	0.841758	671;1870;2827;4906;5423;5860	0.588011	0.370693	0.635371	1	0.991667
H2-T23	-0.113582	0.929019	1797;3769;3771;4922;5395;5634	0.878569	0.457675	0.360599	0.907526	0.904837	581;820;1293;2444;2446;4418	1.46368	0.79613	0.104013	0.732962	0.732962
H2ac1	-0.00912759	0.521137	1011;1782;1813;3603;5089;5676	0.75335	0.400418	0.467174	0.924301	0.924067	539;1126;2612;4402;4433;5204	0.654871	0.446789	0.565504	1	0.991667
H2ac10	-0.481714	1.71235	111;870;2515;2621;3168;3933;4110;4224;5059;5155;5171;5754;6069;6147;6196	1.40969	0.845225	0.116816	0.729992	0.722015	19;68;146;461;1044;1060;1156;1991;2105;2282;3047;3594;3700;5345;6104	2.35295	1.4656	0.0146449	0.341577	0.341577
H2ac11	-0.494885	2.13721	1378;1835;2621;3933;4224;4997;5046;5179;5217;5258;5608;5754;5863;5979;6069;6196	3.74525	1.82876	0.000549517	0.101111	0.101111	19;146;236;352;461;607;957;998;1036;1169;1218;1991;2282;3594;4380;4837	2.60398	1.62816	0.00834903	0.265885	0.257667
H2ac12	-0.524137	2.41862	1863;2693;3933;4136;4224;5059;5608;5856;6048;6187;6196	1.86043	1.18298	0.0443527	0.638678	0.6104	19;28;167;359;607;1156;1991;2079;2282;3522;4352	2.96972	2.06854	0.00371498	0.19225	0.181829
H2ac13	-0.368712	1.21053	273;1893;2384;3277;3933;4114;4224;4749;5059;5476;5608;5863;6196	1.36563	0.848179	0.128542	0.731498	0.726459	19;352;607;739;1156;1466;1991;2101;2282;2938;3831;4322;5942	1.41663	1.03734	0.115366	0.782975	0.781012
H2ac15	-0.196774	0.918006	220;853;1621;1770;2697;3387;4224;6122;6147	0.809207	0.578111	0.416124	0.922493	0.917846	68;93;1991;2828;3518;4445;4594;5362;5995	2.13932	0.786595	0.0239783	0.431609	0.431609
H2ac18	-0.227497	2.75832	39;57;107;162;181;559;584;1202;2402;2476;4882;5090;5751;5790;5810	4.32929	2.35648	0.000130435	0.027	0.027	405;425;464;1125;1333;3739;3813;5013;5631;5656;6034;6053;6108;6158;6176	1.22246	0.739921	0.174307	0.861648	0.861369
H2ac19	-0.227497	2.75832	39;57;107;162;181;559;584;1202;2402;2476;4882;5090;5751;5790;5810	4.32929	2.35648	0.000130435	0.027	0.027	405;425;464;1125;1333;3739;3813;5013;5631;5656;6034;6053;6108;6158;6176	1.22246	0.739921	0.174307	0.861648	0.861369
H2ac20	-0.169141	2.15461	39;57;107;181;584;1362;1741;2476;2928;3103;4882;5090;5751;5790	3.27072	1.84237	0.00161353	0.140632	0.1337	425;464;1125;1333;3112;3287;3739;4474;4853;5631;6034;6108;6158;6176	0.915759	0.596171	0.333851	0.956502	0.937427
H2ac21	0.0179674	1.23868	835;839;1238;1362;1741;2058;6165	2.20915	1.06126	0.020465	0.546613	0.546613	50;4157;4474;4853;4977;5376;5380	1.42765	0.803067	0.112322	0.765457	0.765457
H2ac4	-0.337801	1.16439	274;514;1552;1724;2668;3933;4945;5059;5608;5863;6196	0.761921	0.556227	0.458854	0.928927	0.924067	19;352;607;1156;1270;2282;3547;4491;4663;5701;5941	1.48652	0.997894	0.0989988	0.745191	0.730675
H2ac6	-0.436647	2.69285	1835;3412;3933;4208;4224;4997;5046;5179;5217;5258;5608;5863;5979;6086;6146	3.24129	2.3042	0.00171739	0.135429	0.135429	69;129;236;352;607;957;998;1036;1169;1218;1991;2007;2282;2803;4380	2.13076	1.44198	0.0243225	0.433097	0.432723
H2ac7	-0.528672	2.39464	624;1672;2621;3933;4224;5059;5171;5608;5754;5863;6069;6147;6196	2.41685	1.1697	0.0125145	0.422939	0.422939	19;68;146;352;461;607;1044;1156;1991;2282;3594;4543;5591	3.13906	2.04848	0.00221014	0.15913	0.156167
H2ac8	-0.472018	2.11488	117;519;853;1621;3910;3933;5059;5608;5863;6061;6147;6162	1.12347	0.703646	0.215588	0.816966	0.816966	53;68;154;352;607;1156;2282;2305;4594;5362;5696;6098	2.57322	1.8096	0.00883333	0.261214	0.257667
H2afb1	0.213277	0.769707	1056	0.769707	0.384854	0.451428	0.922919	0.921884	5159	0.0808057	0.0404029	0.931337	0.996314	0.992184
H2afb2	0.0301598	0.831284	1056;1305;1329;1631;3164;3182;5788	1.21057	0.712439	0.178826	0.787596	0.787596	427;3033;3051;4584;4886;4910;5159	0.754816	0.504131	0.465678	1	0.991667
H2afb3	-0.00845595	0.641361	1329;3027;3363;3919;3968;4690	0.73319	0.485386	0.486696	0.937172	0.937172	1525;2247;2296;2852;3188;4886	0.983616	0.54972	0.290004	0.960492	0.937427
H2afj	-0.0774246	0.575232	1362;1741;1868;2550;2954;4570;5043;5839	0.707077	0.493223	0.512152	0.947625	0.945047	376;1172;1645;3261;3665;4347;4474;4853	0.651178	0.479638	0.569256	1	0.991667
H2afv	0.00133524	0.494276	671;920;3212;4115;4432;5632	0.761425	0.420249	0.4593	0.928694	0.924067	583;1783;2100;3003;5295;5544	0.660634	0.423772	0.559521	1	0.991667
H2afx	0.00537179	0.511885	932;1197;2240;4480;4870;5176	0.626172	0.43269	0.595293	0.977982	0.976372	1039;1345;1735;3975;5018;5283	0.787756	0.438845	0.434825	0.986397	0.985442
H2afz	0.155994	1.19099	170;703;741;991;2783;5434	2.164	1.02043	0.0227609	0.579877	0.549222	781;3432;5224;5474;5512;6045	1.31828	0.55166	0.142134	0.83171	0.825283
H2al1a	-0.276647	0.727179	312;471;479;771;1078;1219;1229;1507;1596;1604;1838;2230;2244;2527;2722;2827;2912;2916;3002;3210;3471;3885;3988;4356;4427;4698;4794;5115;5150;5283;5343;5385;5449;5459;5917	0.784081	0.571184	0.438246	0.918653	0.918154	298;756;766;830;872;932;1065;1100;1421;1517;1788;1859;2227;2330;2744;3005;3213;3299;3303;3388;3493;3688;3971;3985;4377;4611;4619;4708;4986;4996;5137;5444;5736;5744;5903	0.914327	0.623743	0.334773	0.946048	0.937427
H2al1b	-0.267023	0.723232	312;394;471;479;643;771;1078;1219;1229;1507;1596;2244;2527;2722;2824;2827;2912;2916;2922;3002;3471;3988;4356;4427;4698;4794;4889;5115;5150;5283;5343;5385;5459;5917	0.920132	0.616656	0.330697	0.886139	0.885347	298;756;830;872;932;1065;1100;1326;1421;1517;1788;1859;2227;2744;3213;3293;3299;3303;3388;3391;3493;3688;3971;4619;4708;4986;4996;5137;5444;5572;5736;5744;5821;5903	0.883543	0.620338	0.356913	0.94266	0.939953
H2al1c	-0.276647	0.727179	312;471;479;771;1078;1219;1229;1507;1596;1604;1838;2230;2244;2527;2722;2827;2912;2916;3002;3210;3471;3885;3988;4356;4427;4698;4794;5115;5150;5283;5343;5385;5449;5459;5917	0.784081	0.571184	0.438246	0.918653	0.918154	298;756;766;830;872;932;1065;1100;1421;1517;1788;1859;2227;2330;2744;3005;3213;3299;3303;3388;3493;3688;3971;3985;4377;4611;4619;4708;4986;4996;5137;5444;5736;5744;5903	0.914327	0.623743	0.334773	0.946048	0.937427
H2al1d	-0.276647	0.727179	312;471;479;771;1078;1219;1229;1507;1596;1604;1838;2230;2244;2527;2722;2827;2912;2916;3002;3210;3471;3885;3988;4356;4427;4698;4794;5115;5150;5283;5343;5385;5449;5459;5917	0.784081	0.571184	0.438246	0.918653	0.918154	298;756;766;830;872;932;1065;1100;1421;1517;1788;1859;2227;2330;2744;3005;3213;3299;3303;3388;3493;3688;3971;3985;4377;4611;4619;4708;4986;4996;5137;5444;5736;5744;5903	0.914327	0.623743	0.334773	0.946048	0.937427
H2al1e	-0.276647	0.717978	312;471;479;643;771;1078;1219;1229;1507;1596;1604;2244;2527;2722;2827;2912;2916;3002;3471;3885;3988;4356;4427;4698;4794;4889;5115;5150;5283;5343;5385;5449;5459;5917	0.755594	0.563012	0.464984	0.924387	0.924067	298;756;766;830;872;932;1065;1100;1326;1421;1517;1788;1859;2227;2330;2744;3213;3299;3303;3388;3493;3688;3971;4611;4619;4708;4986;4996;5137;5444;5572;5736;5744;5903	0.883543	0.615895	0.356913	0.94266	0.939953
H2al1f	-0.276647	0.727179	312;471;479;771;1078;1219;1229;1507;1596;1604;1838;2230;2244;2527;2722;2827;2912;2916;3002;3210;3471;3885;3988;4356;4427;4698;4794;5115;5150;5283;5343;5385;5449;5459;5917	0.784081	0.571184	0.438246	0.918653	0.918154	298;756;766;830;872;932;1065;1100;1421;1517;1788;1859;2227;2330;2744;3005;3213;3299;3303;3388;3493;3688;3971;3985;4377;4611;4619;4708;4986;4996;5137;5444;5736;5744;5903	0.914327	0.623743	0.334773	0.946048	0.937427
H2al1g	-0.276647	0.727179	312;471;479;771;1078;1219;1229;1507;1596;1604;1838;2230;2244;2527;2722;2827;2912;2916;3002;3210;3471;3885;3988;4356;4427;4698;4794;5115;5150;5283;5343;5385;5449;5459;5917	0.784081	0.571184	0.438246	0.918653	0.918154	298;756;766;830;872;932;1065;1100;1421;1517;1788;1859;2227;2330;2744;3005;3213;3299;3303;3388;3493;3688;3971;3985;4377;4611;4619;4708;4986;4996;5137;5444;5736;5744;5903	0.914327	0.623743	0.334773	0.946048	0.937427
H2al1h	-0.276647	0.727179	312;471;479;771;1078;1219;1229;1507;1596;1604;1838;2230;2244;2527;2722;2827;2912;2916;3002;3210;3471;3885;3988;4356;4427;4698;4794;5115;5150;5283;5343;5385;5449;5459;5917	0.784081	0.571184	0.438246	0.918653	0.918154	298;756;766;830;872;932;1065;1100;1421;1517;1788;1859;2227;2330;2744;3005;3213;3299;3303;3388;3493;3688;3971;3985;4377;4611;4619;4708;4986;4996;5137;5444;5736;5744;5903	0.914327	0.623743	0.334773	0.946048	0.937427
H2al1i	-0.276647	0.727179	312;471;479;771;1078;1219;1229;1507;1596;1604;1838;2230;2244;2527;2722;2827;2912;2916;3002;3210;3471;3885;3988;4356;4427;4698;4794;5115;5150;5283;5343;5385;5449;5459;5917	0.784081	0.571184	0.438246	0.918653	0.918154	298;756;766;830;872;932;1065;1100;1421;1517;1788;1859;2227;2330;2744;3005;3213;3299;3303;3388;3493;3688;3971;3985;4377;4611;4619;4708;4986;4996;5137;5444;5736;5744;5903	0.914327	0.623743	0.334773	0.946048	0.937427
H2al1j	-0.230118	0.710243	771;865;1229;1596;2129;2827;3002;4339;4492;4582;4889;4927;5283;5385;5958	0.724873	0.530687	0.494814	0.945112	0.942653	257;830;932;1288;1326;1633;1723;1876;3213;3388;4086;4619;4986;5350;5444	0.974605	0.609095	0.295622	0.963681	0.937427
H2al1k	-0.276647	0.813627	70;312;446;471;479;643;771;1219;1229;1507;1596;1604;2129;2244;2603;2827;2912;2916;3002;3471;3885;3988;4356;4427;4698;4794;4889;5115;5283;5343;5385;5449;5459;5917	1.13103	0.698003	0.21203	0.818466	0.81509	298;756;766;830;872;932;1100;1326;1421;1517;1788;1859;2227;2330;2744;3213;3299;3303;3388;3612;3971;4086;4611;4619;4708;4986;4996;5444;5572;5736;5744;5769;5903;6145	0.883543	0.615895	0.356913	0.94266	0.939953
H2al1m	-0.276647	0.852407	70;312;446;471;479;643;771;1172;1219;1229;1507;1596;2129;2244;2538;2912;2916;3471;3885;3988;4356;4427;4698;4794;4889;5115;5283;5343;5385;5449;5459;5917	1.20179	0.731062	0.182033	0.791197	0.791197	298;756;766;830;872;932;1100;1326;1421;1517;1788;1859;2227;2330;2744;3299;3303;3677;3971;4086;4619;4708;4986;4996;5043;5444;5572;5736;5744;5769;5903;6145	0.824349	0.604046	0.403459	0.968301	0.967016
H2al1n	-0.248225	1.18817	68;70;394;446;643;771;797;1507;1596;2489;2690;2824;2922;3988;4374;4427;4698;4889;4904;5283;5385;5459;5917	1.59675	1.01764	0.0780217	0.652545	0.652545	298;756;830;932;1311;1326;1517;1788;1841;2227;3293;3391;3525;3726;4619;4708;5418;5444;5572;5769;5821;6145;6147	0.792954	0.549049	0.430228	0.979997	0.979997
H2al1o	-0.253589	0.717473	70;446;479;643;1507;1604;2091;2129;2603;2827;2912;2916;3002;3471;3885;4109;4356;4363;4374;4613;4645;5158;5449;5845;5917	0.83475	0.615699	0.394851	0.909421	0.909421	298;370;766;1057;1570;1602;1841;1852;1859;2106;2330;2744;3213;3299;3303;3388;3612;4086;4124;4611;4708;5572;5736;5769;6145	0.791599	0.550552	0.431636	0.981854	0.981854
H2al2a	-0.212062	0.714229	70;446;1204;2129;2603;3002;3629;3854;4109;5158;5905;6027	0.923212	0.60958	0.328737	0.886625	0.884237	188;310;1057;2106;2361;2586;3213;3612;4086;5011;5769;6145	1.00672	0.612484	0.276089	0.968653	0.937427
H2al2b	-0.0322135	0.805307	517;971;1407;1875;2009;2310;2567;2689;3088;3983;4006;5162	0.824052	0.534554	0.403639	0.919431	0.917846	1053;2209;2232;3127;3526;3648;3905;4206;4340;4808;5244;5698	0.986494	0.690226	0.288194	0.962198	0.937427
H2al2c	-0.0322135	0.805307	517;971;1407;1875;2009;2310;2567;2689;3088;3983;4006;5162	0.824052	0.534554	0.403639	0.919431	0.917846	1053;2209;2232;3127;3526;3648;3905;4206;4340;4808;5244;5698	0.986494	0.690226	0.288194	0.962198	0.937427
H2aw	-0.147243	0.751897	1088;1125;2216;3085;4781;4800;5608;5863	0.73245	0.479502	0.48737	0.93738	0.93738	352;607;1415;1434;3130;3999;5090;5127	1.15796	0.644552	0.200262	0.896308	0.893705
H2bc1	-0.241465	1.03912	35;1075;1540;2346;4264;4789;4868;5292;5310;5496;5880	1.23244	0.763981	0.170484	0.777747	0.773485	335;719;905;923;1347;1426;1951;3869;4675;5140;6180	1.73695	0.890387	0.0578587	0.602604	0.601506
H2bc11	-0.298081	1.12874	35;208;1120;1157;3080;4264;4268;4809;5260;5292;5496;5536;5563;5610;5880	1.81195	0.919985	0.0492138	0.622122	0.6104	335;605;652;679;719;923;955;1406;1947;1951;3135;5058;5095;6007;6180	1.89811	0.966865	0.0409408	0.546758	0.543312
H2bc12	-0.15061	0.790184	35;900;1157;1436;3112;4010;4149;4268;4343;4809;4988;5610	1.19711	0.677609	0.18399	0.793458	0.793458	605;1227;1406;1872;1947;2066;2205;3103;4779;5058;5315;6180	0.956969	0.559874	0.306682	0.958238	0.937427
H2bc13	-0.196387	0.767713	35;530;1137;1157;2380;3069;3244;4010;4264;4268;4293;4809;5190;5292;5880	1.10755	0.658479	0.222981	0.818749	0.81742	335;923;1025;1406;1922;1947;1951;2205;2971;3146;3835;5058;5078;5685;6180	0.793865	0.534993	0.429517	0.979725	0.979725
H2bc14	-0.182837	1.01687	35;599;695;980;1157;1313;2089;4010;4264;4268;4676;4809;5292;5880	1.39778	0.871597	0.119874	0.724496	0.722015	335;923;1406;1539;1947;1951;2205;4126;4902;5058;5235;5520;5616;6180	0.850376	0.53844	0.382268	0.959145	0.958699
H2bc15	-0.384038	1.22275	652;885;900;1157;2261;2901;3474;4010;4665;4863;4988;5128;5567;5741;5802;5859;6159	0.897009	0.58289	0.347157	0.89547	0.89547	56;356;413;474;648;1087;1227;1352;1550;2205;2741;3314;3954;5058;5315;5330;5563	1.69137	1.04745	0.0637802	0.632455	0.626256
H2bc18	-0.00250394	0.768445	284;2352;2662;2751;2774;3010;5496	1.33141	0.658666	0.138478	0.739742	0.736395	719;3205;3441;3464;3553;3863;5931	0.827612	0.549213	0.400804	0.970368	0.967016
H2bc21	-0.169748	1.21304	2343;3526;4808;4941;4988;5322;5440	1.3717	0.72277	0.126795	0.726547	0.726459	775;893;1227;1274;1407;2689;3872	2.12616	1.03929	0.0245628	0.432723	0.432723
H2bc3	-0.160631	0.832299	35;1610;3416;3547;3966;5298;5496;5805	1.36338	0.630862	0.129116	0.729747	0.726459	410;719;917;2249;2668;2799;4605;6180	1.15101	0.713381	0.203029	0.898973	0.893705
H2bc4	-0.294387	1.05106	35;1826;2787;2857;3140;3252;4010;4264;4809;5292;5496;5610;5880;5895	1.32663	0.874153	0.13963	0.736395	0.736395	320;335;605;719;923;1406;1951;2205;2963;3075;3358;3428;4389;6180	1.46789	0.900596	0.103217	0.733597	0.730675
H2bc6	-0.346816	1.39284	885;1826;2380;3069;3872;4010;4264;4809;5000;5292;5567;5802;5859;5880;5895	1.78747	1.04927	0.0519082	0.614	0.6104	320;335;356;413;648;923;1215;1406;1951;2205;2343;3146;3835;4389;5330	1.90971	1.19258	0.0397271	0.548233	0.543312
H2bc7	-0.300298	1.12423	35;900;2787;3140;3252;3519;4010;4394;4809;4863;4988;5128;5190;5946;6118	1.48818	0.963307	0.0986787	0.689502	0.689311	97;269;1025;1087;1227;1352;1406;1821;2205;2696;2963;3075;3428;5315;6180	1.23397	0.765405	0.169966	0.868716	0.861369
H2bc8	-0.271625	0.795934	35;900;1054;1241;1826;2787;3140;3252;4010;4065;4486;4809;4988;5795;5895;5926	1.08198	0.628024	0.235421	0.83303	0.832589	289;320;420;1227;1406;1729;2150;2205;2963;3075;3428;4389;4974;5161;5315;6180	1.15728	0.682451	0.200522	0.895051	0.893705
H2bc9	-0.290948	0.811373	35;900;1137;1241;1666;1826;2915;3252;4010;4065;4154;4197;4809;4988;5386;5795;5879;5895	1.03573	0.61784	0.259798	0.845238	0.841758	320;336;420;829;1227;1406;2018;2061;2150;2205;2963;3300;4389;4549;4974;5078;5315;6180	1.05457	0.69569	0.249566	0.943566	0.937427
H2bfm	0.0673276	0.714361	233;2404;2919;3528;3636;3856	1.24341	0.61232	0.16675	0.777854	0.773485	2359;2579;2687;3296;3811;5982	0.696128	0.443559	0.523203	1	0.991667
H2bu1-ps	-0.0391778	0.848817	476;760;846;1297;1963;2201;2780;3036;5256;5580	1.1419	0.727547	0.207111	0.81467	0.810846	635;959;3179;3435;4014;4252;4918;5369;5455;5739	0.972549	0.601809	0.296709	0.961546	0.937427
H2bu2	-0.0967851	0.589566	846;1297;1963;2343;3036;4200;5256;6021	0.680811	0.48766	0.5388	0.95838	0.956045	194;959;2015;3179;3872;4252;4918;5369	0.698903	0.505592	0.52035	1	0.991667
H2c8	-0.0821024	0.670416	1298;2495;2589;2670;2871;3014;4001;5356;5618	0.825753	0.574733	0.402385	0.920373	0.917846	597;859;2214;3201;3344;3545;3626;3720;4917	0.639319	0.492465	0.581535	1	0.991667
H3c1	-0.301535	1.32538	1532;3315;3641;3995;5027;5345;6046;6172	1.08536	0.678289	0.233688	0.832232	0.831202	43;169;870;1188;2220;2574;2900;4683	1.75566	1.13556	0.0555833	0.593845	0.591885
H3c10	-0.0701412	0.789129	2337;3052;3641;4285;4867;5372	0.670939	0.444537	0.548938	0.961949	0.961949	843;1348;1930;2574;3163;3878	1.22858	0.676319	0.172012	0.871107	0.861369
H3c11	-0.134662	0.635264	427;672;949;1233;2337;2645;3011;3052;3508;3641;3829;4349;5372;5820	0.769746	0.539646	0.451361	0.923923	0.921884	395;843;1866;2386;2574;2707;3163;3204;3570;3878;4982;5266;5543;5788	0.766362	0.544832	0.4546	0.998432	0.991667
H3c13	-0.298317	0.814638	460;1076;1308;1336;1652;1689;1956;2930;2981;4231;4635;4906;5188;5663;5760;6112	0.868452	0.556728	0.368321	0.914453	0.909421	103;455;552;1027;1309;1580;1984;3234;3285;4259;4526;4563;4879;4907;5139;5755	0.938913	0.698562	0.318217	0.963378	0.937427
H3c14	-0.378247	1.18045	1076;1308;1336;1689;1956;2313;2930;2981;4231;4635;4906;5188;5663;5760;6109;6112	0.796096	0.593389	0.427609	0.923233	0.918154	103;106;455;552;1027;1309;1580;1984;3234;3285;3902;4259;4526;4879;4907;5139	1.56156	1.01124	0.0845266	0.68281	0.681029
H3c15	-0.378247	1.18045	1076;1308;1336;1689;1956;2313;2930;2981;4231;4635;4906;5188;5663;5760;6109;6112	0.796096	0.593389	0.427609	0.923233	0.918154	103;106;455;552;1027;1309;1580;1984;3234;3285;3902;4259;4526;4879;4907;5139	1.56156	1.01124	0.0845266	0.68281	0.681029
H3c2	-0.203956	1.00869	228;1133;1532;4478;4860;5345;5732;6046	0.939337	0.608094	0.317965	0.892458	0.884237	169;483;870;1355;1737;4683;5082;5987	1.44682	0.864445	0.108002	0.75465	0.752832
H3c3	-0.29774	1.10138	228;949;1532;2645;2720;3508;4513;5027;5345;5732;5820;6046	0.715775	0.529637	0.503482	0.945313	0.942653	169;395;483;870;1188;1702;2707;3495;3570;4683;5266;5987	1.33909	0.943732	0.136178	0.817065	0.814345
H3c4	-0.113771	0.714426	1314;1515;2323;3275;4349;5900;5940	0.586459	0.448431	0.637028	0.990533	0.979331	275;315;1866;2940;3892;4700;4901	1.38087	0.612411	0.124441	0.798736	0.798736
H3c6	-0.404743	2.23103	1515;2221;2488;5658;5920;5940;6031;6186	2.51092	1.134	0.0104746	0.394227	0.394227	29;184;275;295;557;3727;3994;4700	3.61175	1.90975	0.000740338	0.102167	0.102167
H3c7	-0.365589	1.63017	228;344;1532;2221;2576;5301;5345;5410;5732;5772;5992;6046	2.44581	0.825808	0.0118865	0.410083	0.410083	169;223;443;483;805;870;914;3639;3994;4683;5871;5987	2.55047	1.39579	0.00924396	0.259458	0.257667
H3c8	-0.20592	0.851193	994;2337;2687;3052;3641;3679;4867;5161;5372;5381;5728	0.952941	0.645638	0.309255	0.884501	0.884237	487;834;843;1054;1348;2536;2574;3163;3528;3878;5221	1.29096	0.729574	0.150778	0.835077	0.825283
H3f3a	-0.191741	0.914227	486;2475;3524;3597;4683;5080;5419;6042	0.808913	0.5414	0.416338	0.921733	0.917846	173;796;1135;1532;2618;2691;3740;5729	1.2265	0.783574	0.17274	0.869477	0.861369
H3f3a-ps2	-0.0800845	0.590426	3597;4683	0.311968	0.185888	0.792432	0.98741	0.979331	1532;2618	0.750803	0.393609	0.469585	1	0.991667
H3f3b	0.0235673	0.677336	129;1243;1417;2853;3548;6152	0.962179	0.5806	0.3035	0.875603	0.874557	63;2667;3362;4798;4972;6086	1.23801	0.471702	0.168737	0.865102	0.861369
H3f3c	-0.0955597	0.632898	612;1444;3055;3597;4159;4683;6042	0.556299	0.435885	0.66815	0.98879	0.979331	173;1532;2056;2618;3160;4771;5603	0.783802	0.54263	0.438394	0.987728	0.986033
H4c1	-0.114989	0.752814	182;353;1509;1510;2611;3096;3372;5203;5356;5618	1.04118	0.645448	0.256803	0.848834	0.841758	597;859;1012;2843;3119;3604;4705;4706;5862;6033	0.825797	0.523346	0.402379	0.969927	0.967016
H4c11	-0.148301	0.624924	892;1298;2269;2451;3125;3161;3353;4059;5349;5356;5750	0.67372	0.513652	0.546107	0.958002	0.958002	465;859;866;2156;2862;3054;3090;3764;3946;4917;5323	0.871515	0.53594	0.365994	0.949978	0.946264
H4c12	-0.32586	1.24981	892;1171;2269;2566;3125;3353;4059;5356;5618;5750;5811;6125	0.746106	0.551616	0.474111	0.928047	0.928047	90;404;465;597;859;2156;2862;3090;3649;3946;5044;5323	1.85045	1.07068	0.0451582	0.562271	0.561896
H4c14	-0.0357458	0.580712	255;2074;3081;3157;3391;4686;5201	0.678319	0.49396	0.541304	0.957692	0.956045	1014;1529;2824;3058;3134;4141;5960	0.773783	0.49786	0.447533	0.996121	0.991081
H4c2	-0.226226	1.34071	1684;2451;3096;5349;5356;5409;5618;5701	1.84072	0.804875	0.0463563	0.62923	0.6104	514;597;806;859;866;3119;3764;4531	2.72662	1.14844	0.00611473	0.230136	0.230136
H4c3	-0.117272	0.76724	1510;3339;3395;3945;4172;4764;4912;5356	1.10075	0.597808	0.226186	0.823218	0.822917	859;1303;1451;2043;2270;2820;2876;4705	1.13689	0.657632	0.209412	0.903089	0.899207
H4c4	-0.124622	0.757827	255;526;1506;3191;4949;5203;5267;5618	0.928083	0.602494	0.325351	0.890549	0.884237	597;948;1012;1266;3024;4709;5689;5960	1.31442	0.649594	0.143435	0.830517	0.825283
H4c6	-0.16755	0.851746	182;728;729;1510;1853;2636;4604;5356;5618;6033	1.09211	0.73012	0.230419	0.827709	0.827709	182;597;859;1611;3579;4362;4705;5486;5487;6033	0.951235	0.642932	0.310364	0.957099	0.937427
H4c9	-0.149768	1.26224	18;51;1123;1664;2034;2329;2397;3211;5356;6199	2.54702	1.08095	0.00929348	0.375366	0.375366	16;859;3004;3818;3886;4181;4551;5092;6164;6197	1.59933	0.780862	0.0775809	0.676179	0.668357
H4f16	-0.105182	0.898994	2568;3344;3593;4712;4901;5793	0.763398	0.448295	0.457435	0.929463	0.924067	422;1314;1503;2622;2871;3647	1.38861	0.77044	0.122251	0.797039	0.797039
Haspin	0.0443556	0.62752	491;700;1250;3227;4969;5647	1.08097	0.537896	0.235878	0.832866	0.832589	568;1246;2988;4965;5515;5724	0.608374	0.405099	0.614039	1	0.991667
Hat1	-0.244112	1.83628	3208;5160;5416;5574;5598;5916	2.06747	0.896146	0.0280024	0.610158	0.605527	299;617;641;799;1055;3007	3.15325	1.57288	0.00216184	0.162727	0.156167
Hcfc1	0.0696563	0.641043	241;1758;2651;2769;3564;5020	0.799142	0.549507	0.424809	0.921997	0.918154	1195;2651;3446;3564;4457;5974	0.530053	0.36815	0.693359	1	0.991667
Hcfc2	-0.293343	1.98179	3848;4891;5420;5553;5781;6136	1.7191	0.905388	0.0602379	0.627384	0.627384	79;434;662;795;1324;2367	2.68333	1.69761	0.00710507	0.245125	0.242327
Hdac1	0.184602	1.51949	98;257;503;683;2581;5799	2.76085	1.30155	0.0056872	0.294312	0.294312	416;3634;5532;5712;5958;6117	1.7292	0.712512	0.0587029	0.603801	0.601506
Hdac10	0.0374168	0.617532	395;2877;2896;3423;3810;4556	0.808725	0.529353	0.416559	0.919763	0.917846	1659;2405;2792;3319;3338;5820	0.905856	0.448631	0.340785	0.945293	0.937427
Hdac11	0.0831053	0.771011	714;1094;2838;3173;3358;3485	1.50701	0.660813	0.0949167	0.6834	0.6834	2730;2857;3042;3377;5121;5501	0.835523	0.455472	0.39422	0.97147	0.967016
Hdac2	-0.00127475	0.647067	1776;2914;2995;3312;4288;4490	0.846749	0.50656	0.38514	0.911131	0.909421	1725;1927;2903;3220;3301;4439	0.924508	0.554616	0.327727	0.960559	0.937427
Hdac3	0.0621001	0.734914	200;489;1331;2447;4681;5965	1.17442	0.629895	0.193287	0.798214	0.79564	250;1534;3768;4884;5726;6015	0.706448	0.424856	0.512932	1	0.991667
Hdac4	-0.0129872	0.565077	1657;2170;2345;3786;4376;5462	0.585973	0.412669	0.637558	0.990428	0.979331	753;1839;2429;3870;4045;4558	0.807582	0.484412	0.417484	0.983434	0.976091
Hdac5	-0.0376103	0.598364	1416;2524;3086;3496;4747;5669	0.541352	0.379552	0.68279	0.992713	0.979331	546;1468;2719;3129;3691;4799	0.744439	0.512929	0.475762	1	0.991667
Hdac6	0.062988	0.64634	814;1463;2249;2254;3484;5127	0.97693	0.553999	0.29407	0.879025	0.874557	1088;2731;3961;3966;4752;5401	0.607499	0.404714	0.614957	1	0.991667
Hdac7	0.0139718	0.493663	494;1294;2413;4347;4621;5429	0.592407	0.423255	0.630745	0.988187	0.979331	786;1594;1868;3802;4921;5721	0.730798	0.398541	0.489182	1	0.991667
Hdac8	0.146421	0.999444	313;448;1055;2641;3321;3969	1.25174	0.856464	0.163732	0.779138	0.773485	2246;2894;3574;5160;5767;5902	0.687856	0.442632	0.531773	1	0.991667
Hdac9	0.119388	0.809426	103;1037;1837;2898;3444;4520	1.03868	0.693782	0.258348	0.848857	0.841758	1695;2771;3317;4378;5178;6112	0.551115	0.352892	0.673266	1	0.991667
Hdgf	-0.00208992	0.516095	881;1585;1623;3267;5228;5714	0.84252	0.424397	0.388665	0.914247	0.909421	501;987;2948;4592;4630;5334	0.722492	0.442475	0.497127	1	0.991667
Hdgfl2	-0.0815118	0.74989	1816;3066;3097;3133;5281;5967	0.622911	0.393988	0.598622	0.977631	0.976372	248;934;3082;3118;3149;4399	1.00478	0.642752	0.277407	0.965097	0.937427
Hells	0.0558909	0.671594	958;1807;2717;3385;3531;3867	1.23598	0.575644	0.169319	0.778867	0.773485	2348;2684;2830;3498;4408;5257	0.675069	0.458148	0.544793	1	0.991667
Hif1an	-0.0432967	0.724151	2496;2841;3033;3576;4874;5174	0.733285	0.46073	0.486571	0.938023	0.937172	1041;1341;2639;3182;3374;3719	1.33767	0.620662	0.136513	0.816123	0.814345
Hinfp	0.0890314	1.3167	275;423;455;860;2628;6170	2.38879	1.12791	0.0137476	0.446392	0.446392	45;3587;5355;5760;5792;5940	1.47094	0.790575	0.102639	0.735801	0.730675
Hira	0.169943	1.15411	114;1251;1383;1866;2358;3394	1.57596	0.988982	0.0819324	0.655459	0.653416	2821;3857;4349;4832;4964;6101	0.922199	0.507627	0.329295	0.958369	0.937427
Hirip3	0.106425	0.801687	81;2027;2150;2762;3269;4445	1.13523	0.687154	0.210344	0.8196	0.81509	1770;2946;3453;4065;4188;6134	0.588543	0.383968	0.63481	1	0.991667
Hist1h2al	-0.118394	3.11378	39;57;107;162;181;559;584;2476;4882;5090;5751;5790	4.8696	2.66057	3.98551e-05	0.0165	0.0165	425;464;1125;1333;3739;5631;5656;6034;6053;6108;6158;6176	3.45726	1.01985	0.00105676	0.125	0.125
Hist1h2an	-0.640163	2.49401	1378;1870;2123;2621;2733;3933;4224;5059;5095;5608;5754;5863;6069;6196;6212	1.40969	0.882758	0.116816	0.729992	0.722015	3;19;146;352;461;607;1120;1156;1991;2282;3482;3594;4092;4345;4837	3.02534	2.1316	0.00286594	0.163655	0.163655
Hist1h2ao	-0.521512	2.11677	1286;1345;1835;3277;3933;4224;4734;4736;4997;5046;5179;5217;5258;5476;5608;5863;5873;5979;6147;6196	3.34075	1.81085	0.00136232	0.141	0.1337	19;68;236;342;352;607;739;957;998;1036;1169;1218;1479;1481;1991;2282;2938;4380;4870;4929	2.42358	1.53213	0.0123768	0.30591	0.30591
Hist1h2ap	-0.521512	2.11677	1286;1345;1835;3277;3933;4224;4734;4736;4997;5046;5179;5217;5258;5476;5608;5863;5873;5979;6147;6196	3.34075	1.81085	0.00136232	0.141	0.1337	19;68;236;342;352;607;739;957;998;1036;1169;1218;1479;1481;1991;2282;2938;4380;4870;4929	2.42358	1.53213	0.0123768	0.30591	0.30591
Hist1h2bp	-0.181693	1.05397	35;266;318;2327;2852;4010;4251;4264;4268;4634;4809;5292;5880	1.6446	0.903253	0.0702923	0.646689	0.643587	335;923;1406;1581;1947;1951;1964;2205;3363;3888;5897;5949;6180	0.929758	0.555242	0.324179	0.960358	0.937427
Hist1h2bq	-0.260715	1.25	35;1157;3474;4010;4264;4268;4809;5128;5292;5496;5610;5880	1.66758	1.07097	0.0670664	0.645709	0.643587	335;605;719;923;1087;1406;1947;1951;2205;2741;5058;6180	1.57508	0.896277	0.0820374	0.675891	0.674495
Hist1h2br	-0.260715	1.25	35;1157;3474;4010;4264;4268;4809;5128;5292;5496;5610;5880	1.66758	1.07097	0.0670664	0.645709	0.643587	335;605;719;923;1087;1406;1947;1951;2205;2741;5058;6180	1.57508	0.896277	0.0820374	0.675891	0.674495
Hist1h4m	-0.449985	1.30476	18;51;1171;1298;1664;2566;2802;3886;4504;5044;5051;5151;5203;5356;5618;5811;6125;6199	2.04418	0.875772	0.0296244	0.605654	0.605527	16;90;404;597;859;1012;1064;1164;1171;1711;2329;3413;3649;4551;4917;5044;6164;6197	1.59494	1.11772	0.0783007	0.675344	0.668357
Hist1h4n	-0.449985	1.36483	18;51;1171;1298;1664;2566;3211;3886;5044;5051;5151;5203;5356;5618;5811;6125;6199	2.09175	0.87831	0.0267065	0.58968	0.58968	16;90;404;597;859;1012;1064;1164;1171;2329;3004;3649;4551;4917;5044;6164;6197	1.63976	1.16906	0.0713865	0.649538	0.649538
Hjurp	0.124658	0.987636	38;843;1026;1711;3377;5861	1.44876	0.846409	0.107599	0.721393	0.715667	354;2838;4504;5189;5372;6177	0.799414	0.440214	0.424669	0.980826	0.976091
Hlcs	0.0747983	0.657467	148;694;2199;3144;4310;5448	0.933661	0.563598	0.321653	0.892224	0.884237	767;1905;3071;4016;5521;6067	0.505325	0.341029	0.714069	1	0.991667
Hltf	0.0693096	0.681525	627;959;1353;2164;4281;5474	1.0282	0.584138	0.264103	0.844313	0.841758	741;1934;4051;4862;5256;5588	0.631341	0.398138	0.589815	1	0.991667
Hmg20a	0.137327	0.912145	55;1278;1316;2592;3956;4081	1.29416	0.781787	0.149847	0.751958	0.751958	2134;2259;3623;4899;4937;6160	0.599581	0.378008	0.62329	1	0.991667
Hmg20b	-0.00133563	0.604219	611;969;1031;4242;5613;5706	1.27568	0.517946	0.155843	0.763538	0.761871	509;602;1973;5184;5246;5604	1.02847	0.511438	0.263972	0.95237	0.937427
Hmgb1	-0.00467338	0.529338	414;995;2492;2776;4171;6108	0.737847	0.453798	0.482059	0.933673	0.932939	107;2044;3439;3723;5220;5801	1.02355	0.444237	0.266829	0.954359	0.937427
Hmgb1-ps2	-0.606923	1.76399	6108	0.00747222	0.00373611	0.993058	0.996065	0.996065	107	1.76399	0.881994	0.0546969	0.592013	0.591885
Hmgb1-ps3	-0.606923	1.76399	6108	0.00747222	0.00373611	0.993058	0.996065	0.996065	107	1.76399	0.881994	0.0546969	0.592013	0.591885
Hmgb1-ps4	-0.606923	1.76399	6108	0.00747222	0.00373611	0.993058	0.996065	0.996065	107	1.76399	0.881994	0.0546969	0.592013	0.591885
Hmgb1-ps7	-0.606923	1.76399	6108	0.00747222	0.00373611	0.993058	0.996065	0.996065	107	1.76399	0.881994	0.0546969	0.592013	0.591885
Hmgb3	0.220153	0.795548	995	0.795548	0.397774	0.428197	0.923299	0.918154	5220	0.0757007	0.0378504	0.935254	0.996641	0.992184
Hmgn1	0.113459	0.859783	350;1339;2025;2127;2316;4767	1.56754	0.736837	0.0832862	0.656771	0.654884	1448;3899;4088;4190;4876;5865	0.944026	0.437903	0.31505	0.964366	0.937427
Hmgn2	0.0700416	0.625049	303;1105;2439;2584;4133;5169	0.815153	0.535804	0.411192	0.922675	0.917846	1046;2082;3631;3776;5110;5912	0.542746	0.349997	0.681447	1	0.991667
Hmgn3	0.202811	1.38965	144;462;947;1001;2726;3582	2.14822	1.19062	0.0235495	0.549268	0.549222	2633;3489;5214;5268;5753;6071	1.30768	0.597414	0.145463	0.833516	0.825283
Hmgn5	-0.11077	0.880792	2179;3324;3498;4702;5329;5815	0.697223	0.421216	0.522126	0.950154	0.950154	400;886;1513;2717;2891;4036	1.15531	0.754854	0.201548	0.89481	0.893705
Hp1bp3	0.188047	1.27267	157;285;1788;2256;2546;2832	2.04767	1.09047	0.0294589	0.625436	0.605527	3383;3669;3959;4427;5930;6058	1.19307	0.551079	0.185702	0.883684	0.879794
Hr	-0.0387177	0.601757	346;2976;3187;3689;5312;5771	0.60055	0.401087	0.622239	0.989844	0.979331	444;903;2526;3028;3239;5869	0.956535	0.515828	0.306888	0.957073	0.937427
Huwe1	-0.131665	0.992017	44;1949;3357;5702;5752;6173	1.3872	0.580389	0.122807	0.728918	0.725523	42;463;513;2858;4266;6171	2.06099	0.850059	0.0287101	0.470733	0.470733
Ikzf1	0.0340504	0.591693	1321;1504;2820;3657;3763;4481	0.851978	0.507198	0.380914	0.918186	0.909421	1734;2452;2558;3395;4711;4894	0.622244	0.451274	0.599337	1	0.991667
Ikzf3	0.0719895	0.83471	1198;2197;2735;2793;2810;3288	1.65864	0.715343	0.0685169	0.644682	0.643587	2927;3405;3422;3480;4018;5017	0.931655	0.556877	0.323139	0.958993	0.937427
Il4i1	0.0682583	0.646553	400;662;2528;3243;3533;5333	0.964622	0.554209	0.301948	0.877239	0.874557	882;2682;2972;3687;5553;5815	0.535136	0.367043	0.688763	1	0.991667
Il4i1b	0.0682583	0.646553	400;662;2528;3243;3533;5333	0.964622	0.554209	0.301948	0.877239	0.874557	882;2682;2972;3687;5553;5815	0.535136	0.367043	0.688763	1	0.991667
Ing1	-0.0315573	0.585181	1263;1925;2991;3309;5426;5479	0.579057	0.388608	0.644725	0.990412	0.979331	736;789;2906;3224;4290;4952	0.852383	0.501633	0.380732	0.958195	0.958195
Ing2	0.0435641	0.65179	1211;1497;2923;3761;3787;3846	1.25017	0.558681	0.164466	0.78039	0.773485	2369;2428;2454;3292;4718;5004	0.683029	0.476224	0.536647	1	0.991667
Ing3	0.0385264	0.740681	1846;2541;2741;3056;3317;3729	1.33067	0.6348	0.138691	0.738495	0.736395	2486;2898;3159;3474;3674;4369	0.917935	0.575284	0.332335	0.957123	0.937427
Ing4	-0.0591741	0.653241	601;2467;3376;4804;5339;5631	0.559286	0.385145	0.665116	0.993176	0.979331	584;876;1411;2839;3748;5614	0.966079	0.559917	0.300856	0.958112	0.937427
Ing5	-0.0438342	0.687971	2280;2738;3024;3550;4729;5455	0.64997	0.429874	0.570618	0.972165	0.971649	760;1486;2665;3191;3477;3935	1.19056	0.589679	0.186565	0.88272	0.879794
Ino80	-0.30563	2.18624	3788;4795;5720;5818;5972;5993	2.10583	1.04876	0.0259698	0.581162	0.581162	222;243;397;495;1420;2427	3.29108	1.87231	0.00155676	0.143222	0.139158
Ino80b	-0.036436	0.685738	931;1248;1589;1919;5627;6104	1.18591	0.508771	0.188574	0.798665	0.79564	111;588;4296;4626;4967;5284	1.04458	0.58784	0.254979	0.940414	0.937427
Ino80c	0.0775487	0.718418	320;1686;1717;2619;2696;5538	1.28218	0.615754	0.153696	0.764324	0.761871	677;3519;3596;4498;4529;5895	0.769063	0.40826	0.45204	0.995449	0.991667
Ino80d	-0.0633111	0.644622	1358;2190;3298;3613;5286;5894	0.522384	0.353075	0.699966	0.989875	0.979331	321;929;2602;2917;4025;4857	0.755925	0.552574	0.46474	1	0.991667
Ino80e	-0.0585881	0.699273	2163;2286;2979;4577;4773;5582	0.609209	0.404075	0.613176	0.986803	0.979331	633;1442;1638;3236;3929;4052	1.11421	0.599365	0.219967	0.906134	0.904605
Ints12	0.156019	1.14397	435;638;639;1392;3572;4082	1.80396	0.98017	0.0499469	0.617254	0.6104	2133;2643;4823;5576;5577;5780	0.989204	0.533014	0.286535	0.966399	0.937427
Jade1	0.0345103	0.566636	501;661;2510;3058;5022;5460	0.965623	0.485758	0.301134	0.881057	0.874557	755;1193;3157;3705;5554;5714	0.627694	0.388545	0.593606	1	0.991667
Jade2	0.0221738	0.53093	941;1409;1766;3595;5029;5073	0.773731	0.455161	0.447597	0.924214	0.921884	1142;1186;2620;4449;4806;5274	0.630386	0.416571	0.590749	1	0.991667
Jade3	-0.00901747	0.607063	377;727;1122;3953;4611;6144	1.18855	0.520369	0.187632	0.796713	0.79564	71;1604;2262;5093;5488;5838	1.18892	0.508121	0.187444	0.884353	0.879794
Jak2	-0.162794	1.25399	3163;4325;4627;4802;4913;5960	1.20724	0.601023	0.179919	0.788217	0.788217	255;1302;1413;1588;1890;3052	1.96388	1.07446	0.0354215	0.519097	0.517368
Jarid2	0.159753	1.15031	333;818;871;1302;2394;4654	1.74318	0.98562	0.0568551	0.619421	0.617078	1561;3821;4913;5344;5397;5882	1.04233	0.534592	0.256232	0.938761	0.937427
Jdp2	0.140703	1.05891	529;915;1767;2508;2627;2723	2.14994	0.907396	0.0234251	0.554171	0.549222	3492;3588;3707;4448;5300;5686	1.26456	0.535016	0.159723	0.839689	0.839689
Jmjd1c	-0.0289823	0.59186	388;872;2899;4817;5519;5712	0.792288	0.440372	0.430994	0.925715	0.918154	503;696;1398;3316;5343;5827	0.974617	0.507361	0.29557	0.965412	0.937427
Jmjd4	0.0361847	0.612387	1104;1168;1943;2030;5112;5269	1.11097	0.524917	0.221525	0.818853	0.81742	946;1103;4185;4272;5047;5111	0.672265	0.447047	0.547478	1	0.991667
Jmjd6	0.217731	1.48607	143;265;1139;1433;1992;3201	1.86011	1.27319	0.0443768	0.633517	0.6104	3014;4223;4782;5076;5950;6072	1.13661	0.637746	0.209516	0.90119	0.899207
Jmjd7	0.0413629	0.571557	1004;1731;2299;3148;3592;5070	0.786762	0.489943	0.435947	0.923182	0.918154	1145;2623;3067;3916;4484;5211	0.525678	0.409167	0.697223	1	0.991667
Jmjd8	2.538e-05	0.505362	945;2080;2644;3760;3975;5565	0.635336	0.405907	0.585665	0.977683	0.976372	650;2240;2455;3571;4135;5270	0.581844	0.433253	0.641783	1	0.991667
Kansl1	0.112451	0.914401	1077;1247;1464;2015;3034;3690	1.35807	0.783603	0.130775	0.729172	0.728328	2525;3181;4200;4751;4968;5138	0.745272	0.503098	0.474861	1	0.991667
Kansl2	0.135228	0.990808	579;999;1144;2287;2999;3435	1.54467	0.849063	0.0876135	0.665541	0.665541	2780;3216;3928;5071;5216;5636	0.85903	0.488427	0.375539	0.953822	0.953756
Kansl3	-0.0227455	0.538636	428;2024;2078;3030;4495;6099	0.656519	0.408909	0.563824	0.967556	0.967039	116;1720;3185;4137;4191;5787	0.991681	0.461817	0.285187	0.967766	0.937427
Kat14	-0.142801	1.01356	2759;3589;3849;4470;4505;6106	0.849084	0.464968	0.383391	0.912207	0.909421	109;1710;1745;2366;2626;3456	1.52879	0.868613	0.0905725	0.704169	0.701738
Kat2a	0.137963	0.914483	71;693;1343;3293;3459;4364	1.18892	0.783779	0.187444	0.797964	0.79564	1851;2756;2922;4872;5522;6144	0.577802	0.37323	0.645972	1	0.991667
Kat2b	-0.00409827	0.56678	948;1213;1946;4918;5056;5163	0.701096	0.456152	0.518103	0.946996	0.946996	1052;1159;1297;4269;5002;5267	1.04528	0.485861	0.254663	0.94345	0.937427
Kat5	-0.0407079	0.587057	712;1485;1768;4693;4894;6018	0.772842	0.396031	0.448351	0.92462	0.921884	197;1321;1522;4447;4730;5503	0.89788	0.503283	0.346516	0.940705	0.937427
Kat6a	0.0825477	0.729487	950;1319;1737;2039;3581;4731	1.10515	0.625216	0.224163	0.819457	0.819457	1484;2634;4176;4478;4896;5265	0.669303	0.425501	0.550686	1	0.991667
Kat6b	-0.0702415	0.700247	1804;2043;3707;4444;4805;5816	0.554667	0.376461	0.66976	0.989404	0.979331	399;1410;1771;2508;4172;4411	0.893005	0.60021	0.349936	0.940737	0.937427
Kat7	-0.0665156	0.890389	2975;3204;3828;4334;4610;4925	0.956535	0.534959	0.306888	0.880773	0.880773	1290;1605;1881;2387;3011;3240	1.69696	0.763036	0.0631292	0.633588	0.626256
Kat8	0.0953452	0.802602	218;785;1183;1791;4562;5493	1.28032	0.68787	0.154162	0.764347	0.761871	722;1653;4424;5032;5430;5997	0.763193	0.405393	0.457623	0.998451	0.991667
Kdm1a	-0.206724	1.54271	2795;4602;5325;5387;5590;5826	1.43353	0.738584	0.111159	0.719063	0.719063	389;625;828;890;1613;3420	2.3341	1.3216	0.0152283	0.35025	0.346301
Kdm1b	0.0506106	0.601415	121;1892;1972;3733;3855;5605	0.975135	0.515587	0.295302	0.879532	0.874557	610;2360;2482;4243;4323;6094	0.558967	0.367033	0.665447	1	0.991667
Kdm2a	-0.145543	1.13039	2884;3880;4458;4929;5141;5825	0.934069	0.540303	0.32147	0.893211	0.884237	390;1074;1286;1757;2335;3331	1.62478	0.968615	0.073692	0.656097	0.656097
Kdm2b	0.217711	1.77288	488;697;908;926;1124;2388	3.02153	1.51865	0.00287319	0.19825	0.19184	3827;5091;5289;5307;5518;5727	1.96901	0.897481	0.0350773	0.518643	0.517368
Kdm3a	0.00619715	0.515219	1073;1207;2192;2801;4052;5952	0.728611	0.441676	0.491179	0.941426	0.941426	263;2163;3414;4023;5008;5142	0.689171	0.438767	0.530372	1	0.991667
Kdm3b	-0.0892484	0.826123	1142;3070;4530;4661;5268;5515	0.811877	0.438158	0.413756	0.923423	0.917846	700;947;1554;1685;3145;5073	1.36573	0.70798	0.128541	0.80326	0.801068
Kdm4a	0.12855	0.888546	261;1058;1138;2632;3543;3958	1.17537	0.761505	0.19294	0.79877	0.79564	2257;2672;3583;5077;5157;5954	0.650187	0.409836	0.570324	1	0.991667
Kdm4b	-0.0582745	0.693119	1377;1521;3063;5136;5357;5443	0.676399	0.412262	0.543467	0.95641	0.95641	772;858;1079;3152;4694;4838	1.22851	0.594073	0.172063	0.868707	0.861369
Kdm4c	0.085018	0.903533	1617;1968;2152;2321;2742;3301	1.64835	0.774284	0.0698551	0.646257	0.643587	2914;3473;3894;4063;4247;4598	0.925017	0.583399	0.327492	0.963279	0.937427
Kdm4d	0.0854751	0.774015	119;2052;3200;3236;3443;3887	1.22254	0.663443	0.174304	0.778027	0.778027	2328;2772;2979;3015;4163;6096	0.667579	0.429463	0.55231	1	0.991667
Kdm4dl	0.00628789	0.319301	3236	0.283363	0.141681	0.806877	0.984663	0.979331	2979	0.319301	0.15965	0.788792	1	0.991667
Kdm5a	-0.168838	1.3757	3136;4252;5134;5154;5392;5521	1.22756	0.689942	0.172353	0.773485	0.773485	694;823;1061;1081;1963;3079	2.02809	1.17863	0.0305507	0.486462	0.486462
Kdm5b	-0.0533719	0.656496	1462;2521;3545;4139;5057;5466	0.531303	0.384504	0.692283	0.989146	0.979331	749;1158;2076;2670;3694;4753	0.779104	0.562713	0.4428	0.990914	0.988566
Kdm5c	-0.0448956	0.576293	903;2077;2565;4321;4566;5974	0.545414	0.355145	0.678832	0.990437	0.979331	241;1649;1894;3650;4138;5312	0.720606	0.494048	0.498795	1	0.991667
Kdm5d	0.0130309	0.51356	245;1942;3290;3970;4070;5572	0.713402	0.440309	0.505802	0.944316	0.944316	643;2145;2245;2925;4273;5970	0.685505	0.409615	0.533937	1	0.991667
Kdm6a	-0.074754	0.871611	1209;3520;4557;4861;4893;4971	0.825193	0.50954	0.402907	0.920295	0.917846	1244;1322;1354;1658;2695;5006	1.38863	0.746916	0.122229	0.800047	0.797039
Kdm6b	0.0515857	0.73053	1815;1967;2047;2450;2649;5061	1.31461	0.626084	0.143431	0.744583	0.742098	1154;3566;3765;4168;4248;4400	0.899511	0.525979	0.345423	0.942372	0.937427
Kdm7a	-0.0184051	0.540499	1126;2302;2819;3537;4340;5689	0.534299	0.384385	0.689501	0.991158	0.979331	526;1875;2678;3396;3913;5089	0.65761	0.46336	0.562676	1	0.991667
Kdm8	0.237361	1.67161	23;29;437;2731;3105;4536	3.49398	1.43035	0.000937198	0.1552	0.1337	1679;3110;3484;5778;6186;6192	1.57787	0.639244	0.081657	0.682949	0.674495
Keap1	-0.718019	4.92659	5031;6058;6138;6177;6182;6213	5.24698	2.48878	2.17391e-05	0.018	0.014	2;33;38;77;157;1184	7.22032	4.20688	0	0	0
Kmt2a	0.0959984	0.814813	459;482;1491;1675;4503;5306	1.37416	0.698295	0.126283	0.728655	0.726459	909;1712;4540;4724;5733;5756	0.816764	0.424058	0.409707	0.977628	0.976091
Kmt2b	-0.0753577	0.797404	1074;3567;4338;4461;4701;5571	0.788514	0.448166	0.434279	0.925568	0.918154	644;1514;1754;1877;2648;5141	1.31531	0.68338	0.143171	0.831902	0.825283
Kmt2c	-0.123633	0.817185	1933;2139;3490;4306;5274;6129	0.538118	0.352463	0.685861	0.993689	0.979331	86;941;1909;2725;4076;4282	1.11098	0.700441	0.221492	0.907896	0.907896
Kmt2d	-0.132212	1.10549	365;4358;5049;5101;5138;5953	1.23125	0.590694	0.171203	0.774623	0.773485	262;1077;1114;1166;1857;5850	1.99883	0.947198	0.0328225	0.498661	0.495527
Kmt2e	-0.0734197	0.86054	2578;3115;4204;4213;4692;5214	0.767674	0.494568	0.453211	0.924283	0.924067	1001;1523;2002;2011;3100;3637	1.39577	0.737472	0.120597	0.80204	0.797039
Kmt5a	0.122349	0.991271	110;386;645;3000;3289;5757	1.79319	0.849417	0.0510326	0.616861	0.6104	458;2926;3215;5570;5829;6105	0.982944	0.458414	0.290412	0.958012	0.937427
Kmt5b	-0.0368107	0.619552	1785;2063;2931;3464;4008;5934	0.623832	0.397415	0.597773	0.978174	0.976372	281;2207;2751;3284;4152;4430	0.881805	0.531102	0.358225	0.943116	0.939953
Kmt5c	-0.0206916	0.616588	1603;2663;2890;3253;5041;5050	0.592123	0.433497	0.630995	0.986712	0.979331	1165;1174;2962;3325;3552;4612	0.804503	0.528523	0.420097	0.985382	0.976091
L3mbtl1	0.017316	0.63225	66;830;4078;4125;4730;5764	1.21886	0.542037	0.175772	0.782468	0.782468	451;1485;2090;2137;5385;6149	1.04424	0.456899	0.255221	0.939213	0.937427
L3mbtl2	0.0237282	0.556982	655;2509;2837;3429;4392;4546	0.814451	0.477478	0.411616	0.922376	0.917846	1669;1823;2786;3378;3706;5560	0.738222	0.439354	0.481696	1	0.991667
L3mbtl3	-0.0313354	0.583485	857;1897;2407;3421;3447;6107	0.852861	0.416898	0.380378	0.920915	0.909421	108;2768;2794;3808;4318;5358	1.01987	0.500235	0.268905	0.953546	0.937427
L3mbtl4	-0.124464	0.80447	452;960;3821;4335;5566;6190	0.737633	0.396963	0.482244	0.932939	0.932939	25;649;1880;2394;5255;5763	1.62603	0.689589	0.0734964	0.657892	0.656097
Las1l	-0.00749561	0.74844	12;2701;4456;4790;5075;5578	1.94024	0.641631	0.0375254	0.640639	0.6104	637;1140;1425;1759;3514;6203	1.30538	0.597654	0.146222	0.82926	0.825283
Lbr	-0.0617478	0.740086	1399;3067;3534;4751;5116;5121	0.619122	0.431403	0.602577	0.980224	0.979331	1094;1099;1464;2681;3148;4816	1.00533	0.634295	0.277068	0.967983	0.937427
Leo1	0.125172	1.05949	209;610;911;1022;3440;5784	2.11566	0.907804	0.0250483	0.568219	0.568219	431;2775;5193;5304;5605;6006	1.28587	0.526502	0.15249	0.830671	0.825283
LOC100041708	0.17188	0.648175	1397	0.648175	0.324087	0.572367	0.972144	0.972144	4818	0.110504	0.0552522	0.909326	0.995929	0.991667
LOC101055672	0.138444	0.549094	1755	0.549094	0.274547	0.675273	0.99048	0.979331	4460	0.144036	0.0720182	0.886112	1	0.991667
LOC102639044	-0.156149	0.650982	4827	0.109694	0.054847	0.909868	0.982871	0.982567	1388	0.650982	0.325491	0.569568	1	0.991667
LOC115487456	0.145889	0.573002	1661	0.573002	0.286501	0.651045	0.990018	0.979331	4554	0.134978	0.0674891	0.892283	0.999067	0.991667
LOC115488175	-0.348569	1.49603	5608;5863	0.754432	0.268312	0.466042	0.925379	0.924067	352;607	2.02037	0.997163	0.0310036	0.488971	0.488971
LOC115488337	-0.00223744	0.372062	1986;4571	0.361598	0.209439	0.769275	0.982205	0.979331	1644;4229	0.409894	0.248054	0.749088	1	0.991667
LOC115489307	0.138444	0.549094	1755	0.549094	0.274547	0.675273	0.99048	0.979331	4460	0.144036	0.0720182	0.886112	1	0.991667
LOC115489679	-0.606923	1.76399	6108	0.00747222	0.00373611	0.993058	0.996065	0.996065	107	1.76399	0.881994	0.0546969	0.592013	0.591885
LOC115489913	-0.0215701	0.370617	3568	0.240946	0.120473	0.82865	0.982279	0.979331	2647	0.370617	0.185309	0.765303	1	0.991667
LOC115489966	0.218201	1.12291	322;1429;1819	1.60062	0.842068	0.0774336	0.650914	0.650914	4396;4786;5893	0.740747	0.299543	0.479252	1	0.991667
LOC115490141	-0.538545	1.59197	6056	0.0111854	0.00559269	0.98963	0.999895	0.996065	159	1.59197	0.795987	0.0791051	0.668357	0.668357
LOC115490444	0.174214	0.653178	1381	0.653178	0.326589	0.567278	0.970467	0.969796	4834	0.109065	0.0545323	0.910293	0.995014	0.991667
Lrwd1	-0.120996	1.00324	2869;3777;4046;4318;4798;5903	0.902365	0.494508	0.343483	0.894352	0.893436	312;1417;1897;2169;2438;3346	1.61307	0.859729	0.0753647	0.667401	0.664649
Macroh2a1	0.0279205	0.61414	1458;2547;2586;2750;3671;4759	0.752808	0.526406	0.467614	0.924067	0.924067	1456;2544;3465;3629;3668;4757	0.754071	0.491309	0.46656	1	0.991667
Macroh2a2	0.0781153	0.695793	244;1987;2398;3286;3838;4025	1.13163	0.596416	0.211827	0.819593	0.81509	2190;2377;2929;3817;4228;5971	0.618342	0.397024	0.603473	1	0.991667
Map3k7	0.036839	0.66071	124;378;2657;3826;5262;5740	1.36469	0.566366	0.128837	0.730664	0.726459	475;953;2389;3558;5837;6091	0.741677	0.426753	0.47837	1	0.991667
Mapkapk3	0.0636275	0.650369	811;978;2767;3091;3894;4324	0.944913	0.557472	0.31444	0.888587	0.884237	1891;2321;3124;3448;5237;5404	0.550163	0.40488	0.674219	1	0.991667
Mastl	0.0529296	0.656895	363;373;3368;3580;4344;5293	1.37477	0.563049	0.126163	0.73051	0.726459	922;1871;2635;2847;5842;5852	0.7121	0.410125	0.507112	1	0.991667
Max	0.186439	1.18132	6;905;1092;1991;2698;5242	2.23917	1.01241	0.0193152	0.5331	0.5331	973;3517;4224;5123;5310;6209	0.768268	0.41765	0.452809	0.995819	0.991667
Maz	0.0336376	0.572997	782;1256;1328;4146;4369;5330	1.02274	0.491185	0.26728	0.847923	0.84666	885;1846;2069;4887;4959;5433	0.659342	0.412924	0.56092	1	0.991667
Mbd1	0.111711	0.816479	137;393;2406;2431;3858;5130	1.33536	0.699775	0.137187	0.737604	0.736395	1085;2357;3784;3809;5822;6078	0.568525	0.368454	0.655583	1	0.991667
Mbd2	0.0603678	0.624492	644;837;2301;3220;3345;5354	0.902365	0.535298	0.343483	0.894352	0.893436	861;2870;2995;3914;5378;5571	0.571307	0.380547	0.652745	1	0.991667
Mbd3	-0.0372103	0.594825	629;2974;3348;3430;5033;5674	0.595274	0.392543	0.627734	0.987206	0.979331	541;1182;2785;2867;3241;5586	0.955486	0.509885	0.307687	0.955966	0.937427
Mbd3l1	0.012457	0.623814	1564;2425;3380;3588;3674;4361	0.922711	0.523833	0.329017	0.8845	0.884237	1854;2541;2627;2835;3790;4651	0.754949	0.534692	0.465569	1	0.991667
Mbd3l2	0.182652	1.30599	262;802;1410;1704;1858;2900	1.99776	1.11901	0.0329444	0.62708	0.605527	3315;4357;4511;4805;5413;5953	1.23051	0.609458	0.17142	0.870773	0.861369
Mbd4	0.107957	0.815456	478;851;1201;2846;3015;4819	1.12028	0.69887	0.217244	0.817627	0.81742	1396;3200;3369;5014;5364;5737	0.657263	0.404705	0.563047	1	0.991667
Mbd5	0.00377767	0.721451	2695;2710;2737;2905;3857;4547	0.819421	0.581089	0.407517	0.921923	0.917846	1668;2358;3310;3478;3505;3520	1.48097	0.618335	0.100459	0.742679	0.730675
Mbd6	0.153914	1.03527	2;500;1669;3512;4696;5054	2.71489	0.887383	0.0066872	0.3164	0.3164	1161;1519;2703;4546;5715;6213	0.534478	0.35284	0.689355	1	0.991667
Mbip	0.0171759	0.59982	1814;1917;2098;2294;3651;5668	0.95519	0.514124	0.307754	0.88173	0.88173	547;2564;3921;4117;4298;4401	0.898919	0.501019	0.345813	0.941885	0.937427
Mbtd1	0.112434	0.849443	546;910;919;2609;3334;4677	1.39765	0.727962	0.1199	0.722015	0.722015	1538;2881;3606;5296;5305;5669	0.762659	0.422941	0.45813	0.99693	0.991667
Mcrs1	-0.0503197	0.684783	2175;2564;2989;3028;5008;5715	0.653021	0.415852	0.567471	0.969796	0.969796	500;1207;3187;3226;3651;4040	1.12194	0.586965	0.216266	0.913612	0.904605
Mdc1	-0.180445	1.29893	2808;4134;4842;5111;5528;5911	1.07914	0.595971	0.237018	0.835111	0.832589	304;687;1104;1373;2081;3407	1.77445	1.11294	0.0531993	0.620408	0.591885
Meaf6	-0.0801222	0.817693	2472;2874;4051;4119;4775;5589	0.723509	0.445	0.496076	0.945342	0.942653	626;1440;2096;2164;3341;3743	1.32091	0.70079	0.141388	0.833231	0.825283
Mecp2	0.0602534	0.659042	747;1542;1685;3911;3998;4113	1.07528	0.564903	0.238816	0.832589	0.832589	2102;2217;2304;4530;4673;5468	0.59522	0.422382	0.627896	1	0.991667
Men1	0.0968548	0.755204	362;1067;1606;3569;3751;3978	1.16224	0.647296	0.198442	0.797621	0.796852	2237;2464;2646;4609;5148;5853	0.634632	0.392051	0.586407	1	0.991667
Mettl1	0.0980518	0.766238	420;1501;1978;2574;3577;3902	1.2125	0.656735	0.178021	0.790354	0.787596	2313;2638;3641;4237;4714;5795	0.662021	0.405581	0.558169	1	0.991667
Mettl11b	-0.0976965	0.954035	1936;3706;4561;4752;4973;5302	0.849015	0.511531	0.383469	0.911082	0.909421	913;1242;1463;1654;2509;4279	1.41578	0.817531	0.115548	0.781012	0.781012
Mettl14	0.0868104	0.781178	349;594;902;2462;4608;5530	1.4178	0.669491	0.11478	0.733884	0.722015	685;1607;3753;5313;5621;5866	0.773327	0.413967	0.447966	0.994413	0.991081
Mettl15	-0.0577581	0.633512	1421;1571;2357;4694;4780;5980	0.58337	0.371013	0.640221	0.990847	0.979331	235;1435;1521;3858;4644;4794	0.898458	0.543071	0.346168	0.941304	0.937427
Mettl16	-0.200319	1.49301	2943;3552;5500;5560;5591;5739	1.67701	0.71847	0.0658901	0.657313	0.643587	476;624;655;715;2663;3272	2.68634	1.27898	0.00708454	0.249617	0.242327
Mettl17	0.189828	1.49262	656;780;924;1068;2104;2418	2.45949	1.27875	0.0115169	0.414609	0.410083	3797;4111;5147;5291;5435;5559	1.48625	0.750793	0.0990676	0.742335	0.730675
Mettl18	-0.110032	0.939886	2473;2840;4545;4788;4998;5665	0.819227	0.472504	0.407709	0.9211	0.917846	550;1217;1427;1670;3375;3742	1.37839	0.805442	0.125016	0.799328	0.799328
Mettl2	0.134067	0.875021	60;1014;1655;2747;3518;4418	1.25814	0.749989	0.161751	0.771931	0.771931	1797;2697;3468;4560;5201;6155	0.537685	0.356362	0.686332	1	0.991667
Mettl21a	-0.102982	0.918039	416;1828;2419;5806;5836;5891	1.30731	0.518509	0.145641	0.742098	0.742098	324;379;409;3796;4387;5799	2.33262	0.786542	0.0152657	0.346301	0.346301
Mettl21c	0.0479185	0.630955	1082;1156;1587;2416;3653;5684	0.892639	0.540807	0.350188	0.899088	0.898957	531;2562;3799;4628;5059;5133	0.571438	0.427359	0.652629	1	0.991667
Mettl22	-0.0868375	0.767907	1310;1880;2076;4657;5888;5902	0.657144	0.405407	0.563139	0.971415	0.967039	313;327;1558;4139;4335;4905	1.47546	0.658134	0.101432	0.736719	0.730675
Mettl23	0.174893	2.10712	14;131;330;477;1388;6191	3.35269	1.80438	0.00132609	0.156857	0.1337	24;4827;5738;5885;6084;6201	2.1501	1.12363	0.0234179	0.426154	0.426154
Mettl24	0.118625	0.896802	684;987;1159;2604;2817;4138	1.20205	0.768537	0.181973	0.793021	0.791197	2077;3398;3611;5056;5228;5531	0.723159	0.455097	0.496455	1	0.991667
Mettl25	0.204486	1.33242	61;421;1173;1474;2522;3704	1.55859	1.1417	0.0849771	0.657579	0.654884	2511;3693;4741;5042;5794;6154	0.926979	0.530659	0.326089	0.964293	0.937427
Mettl27	-0.0959562	0.736903	375;2902;2939;3677;5738;6105	0.57838	0.390571	0.645437	0.990588	0.979331	110;477;2538;3276;3313;5840	1.19236	0.631628	0.185964	0.882395	0.879794
Mettl3	0.130495	0.920644	178;804;1141;1994;2985;5229	1.17155	0.788986	0.194586	0.79564	0.79564	986;3230;4221;5074;5411;6037	0.68443	0.411812	0.535273	1	0.991667
Mettl4	-0.00786903	0.631277	1311;1605;1798;1836;5503;5814	1.24609	0.505335	0.165713	0.775198	0.773485	401;712;4379;4417;4610;4904	0.917094	0.541144	0.332952	0.955577	0.937427
Mettl5	-0.0520555	0.703548	2090;2445;3007;4397;5167;5183	0.585337	0.422284	0.638121	0.989446	0.979331	1032;1048;1818;3208;3770;4125	1.06768	0.603017	0.242687	0.934628	0.934628
Mettl6	0.171489	1.09642	59;302;1969;2108;3563;3890	1.53718	0.939576	0.0888623	0.671945	0.671945	2325;2652;4107;4246;5913;6156	0.666464	0.428197	0.55353	1	0.991667
Mettl7b	-0.059121	0.8544	260;451;1825;5677;5734;6026	1.23319	0.62441	0.170355	0.779304	0.773485	189;481;538;4390;5764;5955	2.00472	0.732183	0.0324529	0.497611	0.495527
Mettl8	0.0209313	0.561222	1060;1860;3366;3741;3773;4658	0.751031	0.481097	0.469507	0.9256	0.924647	1557;2442;2474;2849;4355;5155	0.711396	0.461158	0.507857	1	0.991667
Mettl9	-0.0330415	0.624335	1249;2031;3852;4450;4493;5299	0.582299	0.409623	0.641264	0.99061	0.979331	916;1722;1765;2363;4184;4966	0.919134	0.53515	0.331296	0.957462	0.937427
Mga	-0.0597698	0.713169	142;3221;3963;4020;5464;5912	0.913129	0.459842	0.335802	0.892597	0.890742	303;751;2195;2252;2994;6073	1.09296	0.611258	0.22982	0.917065	0.917065
Mgmt	0.136032	0.956127	289;897;2060;2293;3038;3341	1.61697	0.819396	0.0748007	0.658883	0.650378	2874;3177;3922;4155;5318;5926	0.904857	0.451491	0.341639	0.944497	0.937427
Mllt1	0.117523	0.81699	151;1044;1530;2102;3535;5035	1.0655	0.700228	0.243977	0.836493	0.836148	1180;2680;4113;4685;5171;6064	0.649443	0.368135	0.571072	1	0.991667
Mllt10	0.145757	1.20649	106;382;713;1006;3396;5854	2.1404	1.03369	0.0238792	0.549222	0.549222	361;2819;5209;5502;5833;6109	1.30244	0.569127	0.146943	0.830505	0.825283
Mllt6	-0.0335441	0.607693	1597;2438;2792;4202;4519;5495	0.518611	0.394099	0.703004	0.987425	0.979331	720;1696;2013;3423;3777;4618	0.773504	0.520912	0.447744	0.995254	0.991081
Morc2a	-0.106582	0.919821	990;3812;4137;5098;5439;5527	0.899538	0.476068	0.345373	0.895052	0.895052	688;776;1117;2078;2403;5225	1.49727	0.788222	0.0966643	0.741093	0.730675
Morf4l1	-0.0437312	0.607616	290;1558;3860;4167;5502;5828	0.656603	0.406326	0.563684	0.96832	0.967039	387;713;2048;2355;4657;5925	0.923223	0.520851	0.328733	0.961806	0.937427
Morf4l2	-0.00363575	0.627823	1477;2736;3426;3451;4328;4508	0.836324	0.487106	0.393552	0.912776	0.909421	1707;1887;2764;2789;3479;4738	0.837847	0.538129	0.392319	0.969672	0.967016
Mov10	0.0756065	0.692873	291;1695;2942;2987;2993;4699	1.09355	0.593897	0.229562	0.828222	0.827709	1516;3222;3228;3273;4520;5924	0.664039	0.400335	0.55606	1	0.991667
Mphosph8	-0.0617023	0.783492	2560;3143;3262;4207;4284;5510	0.759994	0.463208	0.460685	0.926967	0.924067	705;1931;2008;2953;3072;3655	1.3829	0.671493	0.12397	0.798809	0.798736
Mrgbp	0.094838	0.765712	622;847;2243;2823;2834;4550	1.19116	0.656266	0.186406	0.797643	0.79564	1665;3381;3392;3972;5368;5593	0.71706	0.410162	0.502373	1	0.991667
Msh6	-0.0497046	0.643576	1099;2847;3268;3728;3830;5982	0.688776	0.395293	0.530836	0.956544	0.954808	233;2385;2487;2947;3368;5116	0.890981	0.551672	0.351535	0.937427	0.937427
Msl1	-0.011198	0.580289	1010;2073;3585;4283;4593;4820	0.661945	0.43204	0.55821	0.967954	0.966815	1395;1622;1932;2630;4142;5205	0.795577	0.497414	0.428114	0.97787	0.97787
Msl2	-0.0594171	0.664714	937;1790;4060;4768;4935;5696	0.633882	0.387641	0.587202	0.977292	0.976372	519;1280;1447;2155;4425;5278	1.03351	0.569748	0.261175	0.946403	0.937427
Msl3	0.0372854	0.588278	692;2503;2559;2790;4272;4625	0.769557	0.504278	0.451478	0.921884	0.921884	1590;1943;3425;3656;3712;5523	0.735749	0.431253	0.484093	1	0.991667
Mst1	-0.0275441	0.539381	558;2118;3114;4275;4616;5794	0.505157	0.36938	0.714423	0.993353	0.979331	421;1599;1940;3101;4097;5657	0.703289	0.462404	0.51599	1	0.991667
Mta1	0.230755	1.6534	67;628;1344;1395;1570;2191	2.71637	1.41656	0.00619565	0.301765	0.301765	4024;4645;4820;4871;5587;6148	1.6752	0.739199	0.0661872	0.62992	0.62992
Mta2	-0.0537939	0.630464	972;1582;2229;4705;5512;5832	0.613582	0.380599	0.608579	0.983225	0.979331	383;703;1510;3986;4633;5243	0.925304	0.540438	0.32726	0.96431	0.937427
Mta3	0.0246805	0.552562	678;1598;2181;2600;3575;5907	0.808267	0.473669	0.416829	0.91791	0.917846	308;2640;3615;4034;4617;5537	0.637058	0.421093	0.583987	1	0.991667
Mtf2	0.0261778	0.581856	807;2661;2851;3453;3590;4753	0.78764	0.49877	0.434999	0.92591	0.918154	1462;2625;2762;3364;3554;5408	0.803607	0.458955	0.420893	0.97893	0.976091
Mybbp1a	-0.0833854	0.689425	1668;1898;2660;4002;4762;6126	0.5324	0.349305	0.691252	0.991094	0.979331	89;1453;2213;3555;4317;4547	1.09716	0.591005	0.228017	0.914276	0.913841
Myo1c	0.0318867	0.547256	473;1600;2940;4085;4141;4786	0.680391	0.469163	0.539222	0.957076	0.956045	1429;2074;2130;3275;4615;5742	0.640801	0.400152	0.580028	1	0.991667
Mysm1	0.0452972	0.676163	430;759;1632;1834;5074;5846	1.24759	0.579557	0.165278	0.777557	0.773485	369;1141;4381;4583;5456;5785	0.74499	0.441956	0.475072	1	0.991667
Naa60	0.059151	0.612017	132;1786;2183;2983;3931;5555	0.94127	0.524663	0.31685	0.892354	0.884237	660;2284;3232;4032;4429;6083	0.507261	0.35353	0.712036	1	0.991667
Nap1l1	0.134356	0.944772	364;595;1818;2487;3400;3414	1.56065	0.80966	0.0846546	0.65816	0.654884	2801;2815;3728;4397;5620;5851	0.869082	0.44234	0.367969	0.947677	0.946264
Nap1l2	-0.0145565	0.711536	2035;3202;3242;3646;3936;4653	0.753829	0.522056	0.466723	0.924514	0.924067	1562;2279;2569;2973;3013;4180	1.08179	0.609834	0.235465	0.930621	0.930621
Nap1l4	0.0718322	0.69562	614;1095;1516;1811;4455;5344	1.26497	0.596209	0.159571	0.768169	0.768169	871;1760;4404;4699;5120;5601	0.75462	0.408356	0.46589	1	0.991667
Nasp	-0.0744643	0.74431	2213;2505;3078;3507;5529;5703	0.626252	0.405312	0.595185	0.978775	0.976372	512;686;2708;3137;3710;4002	1.14656	0.637952	0.205022	0.895821	0.893705
Nat10	0.0172965	0.527352	718;1293;1438;3815;4355;5796	0.948728	0.452083	0.312002	0.887759	0.884237	419;1860;2400;4777;4922;5497	0.574422	0.412965	0.649517	1	0.991667
Nbn	0.134332	0.952171	87;1499;2002;2997;3012;3310	1.64126	0.816056	0.0711292	0.647198	0.643587	2905;3203;3218;4213;4716;6128	0.920446	0.434818	0.33053	0.958595	0.937427
Ncl	0.0790838	0.6699	97;1107;1703;3092;4408;5427	1.06261	0.574265	0.245391	0.836148	0.836148	788;1807;3123;4512;5108;6118	0.505185	0.336337	0.714307	1	0.991667
Ncoa1	0.0151278	0.53415	626;2605;3046;3282;4500;4823	0.660324	0.457918	0.559889	0.966815	0.966815	1392;1715;2933;3169;3610;5589	0.778899	0.443297	0.442874	0.989744	0.988566
Ncoa2	-0.0856053	1.11989	3913;3946;4017;4022;4292;4976	1.57998	0.681413	0.0809239	0.660148	0.653416	1239;1923;2193;2198;2269;2302	2.5876	0.959565	0.00863768	0.260073	0.257667
Ncoa3	-0.067327	0.675957	918;3031;3068;4270;5407;5709	0.609618	0.375827	0.61267	0.986947	0.979331	506;808;1945;3147;3184;5297	0.985768	0.579388	0.288649	0.95792	0.937427
Ncoa6	0.13981	0.935593	52;879;1629;1878;3254;5120	1.31746	0.801854	0.142579	0.747184	0.742098	1095;2961;4337;4586;5336;6163	0.727236	0.379309	0.492566	1	0.991667
Ncor1	0.126655	0.877033	229;863;1110;2408;3912;4279	1.1995	0.751645	0.183167	0.791969	0.791969	1936;2303;3807;5105;5352;5986	0.66229	0.395153	0.557928	1	0.991667
Ncor2	0.123212	1.08691	73;96;1154;2100;5159;5659	2.47316	0.931051	0.0112246	0.413067	0.410083	556;1056;4115;5061;6119;6142	1.07095	0.507925	0.241048	0.937033	0.934628
Nek6	0.0954116	0.834863	930;1150;1371;1460;3482;5007	1.57261	0.715444	0.0824662	0.653416	0.653416	1208;2733;4755;4844;5065;5285	0.93558	0.467553	0.320279	0.962581	0.937427
Nek9	-0.0724962	0.811564	1959;3523;3862;4393;4452;5498	0.770656	0.457916	0.450601	0.925801	0.921884	717;1763;1822;2353;2692;4256	1.28491	0.695525	0.152874	0.830033	0.825283
Nfrkb	-0.111831	0.921949	383;3197;4834;5012;5485;5881	0.98664	0.486346	0.288107	0.870631	0.86977	334;730;1203;1381;3018;5832	1.65493	0.790042	0.0690507	0.638816	0.638816
Nfyb	-0.00252461	0.563005	122;859;3117;4576;5327;5787	0.971917	0.482715	0.297263	0.882201	0.874557	428;888;1639;3098;5356;6093	0.834287	0.463282	0.395158	0.972336	0.967016
Nfyc	-0.131868	0.938417	276;1376;4574;4967;5890;6132	0.833777	0.476939	0.395674	0.91005	0.91005	83;325;1248;1641;4839;5939	1.4802	0.804189	0.100604	0.737168	0.730675
Nipbl	-0.268899	1.72265	4287;4309;4542;5461;5624;6161	1.92551	0.757691	0.0385254	0.63798	0.6104	54;591;754;1673;1906;1928	3.04959	1.47586	0.00271377	0.1605	0.1605
Noc2l	0.0840412	0.786878	287;1090;1425;1456;3927;5747	1.57664	0.674373	0.0818744	0.658175	0.653416	468;2288;4759;4790;5125;5928	0.938061	0.431088	0.318944	0.962062	0.937427
Npas2	0.0416727	0.552646	334;1525;2937;3116;4679;4955	0.627584	0.47379	0.593717	0.980255	0.976372	1260;1536;3099;3278;4690;5881	0.586188	0.373733	0.637335	1	0.991667
Npcd	0.0391567	0.481578	1939;2728;3914	0.602251	0.361193	0.620465	0.989875	0.979331	2301;3487;4276	0.487001	0.306365	0.720624	1	0.991667
Npm1	-0.260501	1.77708	4120;4784;4827;5149;5875;6091	1.7623	0.812703	0.054849	0.622123	0.6104	124;340;1066;1388;1431;2095	2.83312	1.52239	0.00491546	0.208718	0.208
Npm2	0.0494845	0.607705	1187;1404;1986;3338;4005;4571	0.80016	0.520914	0.423907	0.924888	0.918154	1644;2210;2877;4229;4811;5028	0.551856	0.417663	0.672591	1	0.991667
Nsd1	-0.0972493	0.849851	2298;2757;4214;4463;5048;5719	0.682024	0.428878	0.537699	0.957452	0.956045	496;1167;1752;2001;3458;3917	1.20251	0.728341	0.181798	0.875169	0.875169
Nsd2	-0.199458	1.458	3665;4313;4684;5210;5594;5927	1.38615	0.680812	0.123111	0.725523	0.725523	288;621;1005;1531;1902;2550	2.32099	1.24917	0.0156159	0.349459	0.347646
Nsd3	-0.114815	1.03446	2461;3332;4738;4981;5146;5326	0.925153	0.536442	0.327376	0.890204	0.884237	889;1069;1234;1477;2883;3754	1.55561	0.886418	0.0853998	0.686515	0.681029
Nsl1	-0.147762	0.882045	297;1862;2350;3774;5973;6201	0.719097	0.421403	0.500293	0.943606	0.942653	14;242;2441;3865;4353;5918	1.87399	0.755969	0.0432778	0.559906	0.556574
Ntmt1	0.0824191	0.806228	888;1583;2766;2883;2968;3384	1.58365	0.690962	0.0804118	0.662498	0.653416	2831;3247;3332;3449;4632;5327	0.883626	0.496123	0.356808	0.946913	0.939953
Nudt16	0.0252176	0.599515	466;534;1823;3017;4518;6012	1.11166	0.5139	0.220971	0.818631	0.81742	203;1697;3198;4392;5681;5749	0.779847	0.424254	0.442046	0.990566	0.988566
Nudt16l1	0.0735395	0.659419	450;1018;1368;2921;4484;5016	0.994789	0.56523	0.283252	0.870252	0.867413	1199;1731;3294;4847;5197;5765	0.570707	0.367883	0.653309	1	0.991667
Nudt21	0.0142913	0.638407	21;2219;3509;4084;4400;5914	1.70035	0.547343	0.0627186	0.641123	0.641123	301;1815;2131;2706;3996;6194	0.764706	0.454149	0.45611	0.999098	0.991667
Oga	0.0238383	0.620518	342;561;3724;4465;4902;4987	1.07709	0.531932	0.237987	0.833205	0.832589	1228;1313;1750;2491;5654;5873	0.856855	0.463932	0.37724	0.953756	0.953756
Ogt	-0.244293	1.65336	2017;4151;5535;5699;5910;5994	1.73424	0.751323	0.0581473	0.621239	0.621239	221;305;516;680;2064;4198	2.76802	1.41621	0.00559903	0.220762	0.220762
Padi1	0.166931	1.08421	20;524;1042;2525;3106;5083	1.72119	0.929172	0.0600676	0.62957	0.627384	1132;3109;3690;5173;5691;6195	0.694265	0.395776	0.52512	1	0.991667
Padi2	0.102036	0.813667	34;481;1910;4012;4327;5178	1.49565	0.697448	0.0972995	0.688581	0.684814	1037;1888;2203;4305;5734;6181	0.620396	0.35902	0.601351	1	0.991667
Padi3	-0.175462	1.00301	115;2086;3196;3264;6024;6210	0.995085	0.482703	0.283092	0.871375	0.867413	5;191;2951;3019;4129;6100	2.318	0.85957	0.0161329	0.356213	0.347646
Padi4	-0.0147405	0.553954	216;2892;3241;4101;4782;5592	0.75759	0.432428	0.463082	0.927284	0.924067	623;1433;2114;2974;3323;5999	0.913376	0.474865	0.335415	0.946249	0.937427
Paf1	-0.152747	1.11735	1588;2028;2513;5886;5928;5945	1.47311	0.534465	0.101969	0.697769	0.697769	270;287;329;3702;4187;4627	2.59837	0.957173	0.00842029	0.258222	0.257667
Pagr1a	-0.191385	1.14724	1628;1895;3814;5484;6064;6074	0.901101	0.482532	0.34421	0.893436	0.893436	141;151;731;2401;4320;4587	2.09543	0.982861	0.0265133	0.443495	0.443495
Pak2	-0.0725073	0.715009	1443;1591;3610;4890;5431;5619	0.583125	0.392847	0.640434	0.99025	0.979331	596;784;1325;2605;4624;4772	1.02489	0.612837	0.265995	0.955505	0.937427
Parg	0.132383	0.881087	168;766;1536;2259;3365;4555	0.974178	0.755133	0.295818	0.879487	0.874557	1660;2850;3956;4679;5449;6047	0.606257	0.380344	0.616234	1	0.991667
Parp1	0.0290358	0.582472	239;1918;3799;3916;3937;4980	0.721989	0.499345	0.497564	0.944915	0.942653	1235;2278;2299;2416;4297;5976	0.892639	0.431132	0.350188	0.938369	0.937427
Parp2	0.0362196	0.659817	1541;2381;2552;3228;3397;4244	0.993575	0.565538	0.283947	0.869161	0.867413	1971;2818;2987;3663;3834;4674	0.742095	0.508744	0.477998	1	0.991667
Parp3	0.135503	0.926658	202;834;1545;2945;3172;3627	1.40294	0.794172	0.118784	0.728541	0.722015	2588;3043;3270;4670;5381;6013	0.771973	0.416547	0.449215	0.991867	0.991081
Paxip1	-0.409733	2.59012	4499;5117;5422;5600;6174;6184	2.15764	1.16833	0.0231425	0.572	0.549222	31;41;615;793;1098;1716	3.35312	2.21738	0.00132488	0.146267	0.138875
Pbk	-0.0406854	0.632142	939;2868;3126;4403;5144;5227	0.570874	0.402082	0.653211	0.98787	0.979331	988;1071;1812;3089;3347;5276	0.90137	0.541839	0.343981	0.944663	0.937427
Pbrm1	-0.23723	1.72925	4326;4528;5071;5219;5637;6005	1.96598	0.8248	0.0353043	0.621957	0.6104	210;578;996;1144;1687;1889	3.10284	1.48141	0.00236957	0.15696	0.15696
Pcgf1	0.10704	0.832158	498;1522;1679;2470;3513;3554	1.45592	0.713191	0.105839	0.71832	0.715667	2661;2702;3745;4536;4693;5717	0.804055	0.438808	0.420413	0.981952	0.976091
Pcgf2	-0.00186904	0.530479	1035;1363;3213;4254;4691;5034	0.571819	0.421518	0.652229	0.989095	0.979331	1181;1524;1961;3002;4852;5180	0.695679	0.454762	0.523777	1	0.991667
Pcgf3	-0.125544	1.24631	3994;4161;4370;4479;4815;5367	1.6489	0.684498	0.0697295	0.648719	0.643587	848;1400;1736;1845;2054;2221	2.68094	1.06784	0.00717029	0.242327	0.242327
Pcgf5	0.00360008	0.518075	1069;1147;1699;3494;4040;5963	0.804644	0.444125	0.419967	0.919929	0.918154	252;2175;2721;4516;5068;5146	0.703716	0.444088	0.515585	1	0.991667
Pcgf6	-0.058663	0.701312	1556;2782;3619;4509;4880;5377	0.553233	0.405642	0.671266	0.988982	0.979331	838;1335;1706;2596;3433;4659	0.859506	0.601093	0.375211	0.954455	0.953756
Pcna	-0.0867009	1.13701	5;1047;5435;5513;5708;6110	2.318	0.864987	0.0161329	0.504075	0.501309	105;507;702;780;5168;6210	2.54552	0.97413	0.00933575	0.257667	0.257667
Pcna-ps2	-0.233387	1.2235	1047;5435;5513;6110	1.14186	0.416897	0.207114	0.812749	0.810846	105;702;780;5168	2.16002	0.978517	0.0229481	0.422244	0.422244
Pdp1	0.0459604	0.682704	304;2984;3274;3352;3398;4395	0.902474	0.585185	0.34336	0.896852	0.893436	1820;2817;2863;2941;3231;5911	0.960738	0.478908	0.304293	0.959829	0.937427
Pelp1	-0.128854	1.13445	54;976;5062;5504;6019;6065	1.30178	0.709828	0.14745	0.746722	0.746177	150;196;711;1153;5239;6161	1.92835	0.971899	0.0383816	0.538644	0.535345
Phc1	0.0107355	0.684494	553;1824;1844;2115;2654;6142	1.31112	0.586659	0.144231	0.746394	0.742098	73;3561;4100;4371;4391;5662	1.17756	0.550111	0.192047	0.88097	0.880028
Phc2	0.102551	0.869036	647;935;1812;1966;2146;5338	1.71455	0.744726	0.0607621	0.628888	0.628888	877;4069;4249;4403;5280;5568	1.03945	0.473455	0.257632	0.939731	0.937427
Phc3	0.0995679	0.770143	408;490;2315;3139;3802;4263	1.17295	0.660074	0.193871	0.79665	0.79564	1952;2413;3076;3900;5725;5807	0.543529	0.388542	0.680673	1	0.991667
Phf1	0.103176	0.812664	702;1275;1517;1955;3488;4312	1.16093	0.69647	0.199225	0.796899	0.796899	1903;2727;4260;4698;4940;5513	0.698195	0.432308	0.52124	1	0.991667
Phf10	-0.0963509	0.812891	1712;2692;4291;4615;4763;5904	0.709584	0.401724	0.509626	0.947183	0.945047	311;1452;1600;1924;3523;4503	1.1824	0.696688	0.190066	0.88662	0.879794
Phf12	-0.269028	1.96358	3739;5019;5469;5558;5853;5957	1.87343	0.94461	0.0433563	0.635381	0.6104	258;362;657;746;1196;2476	2.89289	1.6819	0.00428744	0.191892	0.191892
Phf13	0.0978719	0.835146	938;942;1354;1602;3343;5094	1.43771	0.715694	0.110193	0.721265	0.718724	1121;2872;4613;4861;5273;5277	0.854073	0.460308	0.379411	0.956323	0.956323
Phf14	0.160259	1.20143	496;1017;1091;1242;1905;4203	1.94822	1.02938	0.0365604	0.630667	0.6104	2012;4310;4973;5124;5198;5719	1.19651	0.589838	0.184281	0.881994	0.879794
Phf19	-0.0718848	0.858444	3040;3199;3573;3807;4162;5660	0.991168	0.499784	0.285471	0.867413	0.867413	555;2053;2408;2642;3016;3175	1.74977	0.735695	0.0561147	0.591885	0.591885
Phf2	0.0255885	0.582064	226;535;3047;3566;4515;5918	1.11034	0.498983	0.221751	0.817862	0.81742	297;1700;2649;3168;5680;5989	0.648812	0.41143	0.571815	1	0.991667
Phf20	-0.0940506	0.91244	3079;3142;3903;4236;4716;5652	1.01248	0.487956	0.27303	0.856322	0.856322	563;1499;1979;2312;3073;3136	1.78197	0.781946	0.0523949	0.615362	0.591885
Phf20l1	-0.054759	0.686063	619;3314;3420;4622;5168;5430	0.693839	0.418851	0.525541	0.953227	0.953227	785;1047;1593;2795;2901;5596	1.14912	0.588018	0.204013	0.900923	0.893705
Phf21a	0.142685	1.0378	456;1274;1322;1752;2596;3611	1.41446	0.889311	0.115891	0.73531	0.722015	2604;3619;4463;4893;4941;5759	0.81041	0.508588	0.415035	0.98608	0.976091
Phf21b	0.0719975	0.778219	685;2412;2616;2867;3340;3378	1.58827	0.666975	0.0796932	0.65986	0.653416	2837;2875;3348;3599;3803;5530	0.886562	0.499937	0.354661	0.942726	0.939953
Phf23	0.0443619	0.588239	508;1245;1842;2379;5042;5383	0.911028	0.504258	0.337045	0.891607	0.890742	832;1173;3836;4373;4970;5707	0.635473	0.3914	0.585558	1	0.991667
Phf3	0.0337358	0.579975	367;2172;2326;4351;4429;4510	0.835168	0.4972	0.394499	0.912416	0.909421	1705;1786;1864;3889;4043;5848	0.732392	0.424272	0.487448	1	0.991667
Phf8	-0.0936063	0.74505	1025;1347;1745;4682;5557;6150	0.78318	0.393521	0.439117	0.918154	0.918154	65;658;1533;4470;4868;5190	1.22514	0.638664	0.173448	0.867764	0.861369
Phip	-0.0136392	0.592849	1576;2591;2964;3330;4628;5126	0.574369	0.430348	0.649557	0.992312	0.979331	1089;1587;2885;3251;3624;4639	0.772836	0.508186	0.448399	0.992711	0.991081
Phrf1	0.112383	0.852226	102;2157;2160;2777;3100;3943	1.18527	0.730436	0.188717	0.797235	0.79564	2272;3115;3438;4055;4058;6113	0.647085	0.418954	0.573466	1	0.991667
Piwil4	-0.0237313	0.611009	1951;2205;2882;3102;4835;5444	0.63149	0.419594	0.58961	0.976394	0.976372	771;1380;3113;3333;4010;4264	0.981324	0.523759	0.29142	0.957524	0.937427
Pkm	-0.0650707	0.710658	2165;2483;2786;2889;4488;6049	0.697563	0.412622	0.521766	0.950543	0.950154	166;1727;3326;3429;3732;4050	1.1155	0.609165	0.219443	0.908495	0.904605
Pkn1	0.11962	1.0207	75;404;592;2274;5279;5362	1.89256	0.874644	0.041401	0.623273	0.6104	853;936;3941;5623;5811;6140	1.04109	0.483858	0.256897	0.939121	0.937427
Pml	0.178556	1.19503	207;212;1332;1713;3483;3662	1.81828	1.02391	0.0483056	0.624953	0.6104	2553;2732;4502;4883;6003;6008	0.79847	0.504884	0.42539	0.97704	0.976091
Pogz	0.0753036	0.696484	686;896;1484;2159;3961;5376	1.03114	0.596951	0.262361	0.843631	0.841758	839;2254;4056;4731;5319;5529	0.632749	0.396302	0.588337	1	0.991667
Pole3	0.142887	0.971552	196;1020;1155;2675;3258;3565	1.44787	0.832616	0.107755	0.719524	0.715667	2650;2957;3540;5060;5195;6019	0.799142	0.434741	0.424809	0.97842	0.976091
POTENTIALLY_ACTIVE_1	-0.0962745	0.51806	4330	0.156883	0.0784417	0.877719	0.982096	0.98149	1885	0.51806	0.25903	0.70351	1	0.991667
POTENTIALLY_ACTIVE_2	-0.170108	0.683793	4928	0.100701	0.0503503	0.916264	0.985282	0.98391	1287	0.683793	0.341896	0.535937	1	0.991667
POTENTIALLY_ACTIVE_3	-0.341492	1.10853	5731	0.0351408	0.0175704	0.968576	0.993781	0.993376	484	1.10853	0.554263	0.222535	0.909921	0.909921
POTENTIALLY_ACTIVE_4	-0.122891	0.578527	4575	0.13298	0.0664901	0.893624	0.985248	0.982372	1640	0.578527	0.289264	0.64528	1	0.991667
POTENTIALLY_ACTIVE_5	0.350548	1.27354	331	1.27354	0.636772	0.156464	0.762071	0.761871	5884	0.0236986	0.0118493	0.978467	0.992249	0.992249
POTENTIALLY_ACTIVE_6	0.195793	0.719287	1186	0.719287	0.359643	0.500062	0.944244	0.942653	5029	0.0918896	0.0459448	0.922856	0.993661	0.991667
POTENTIALLY_ACTIVE_7	0.0954755	0.445651	2227	0.445651	0.222826	0.735245	0.986682	0.979331	3988	0.192616	0.096308	0.855671	1	0.991667
Ppargc1a	0.177927	1.221	236;389;642;2144;3362;3466	1.79856	1.04618	0.0504879	0.614765	0.6104	2749;2853;4071;5573;5826;5979	0.986064	0.528855	0.288428	0.961038	0.937427
Pphln1	-0.165589	1.08171	41;83;580;1355;2082;2608;2707;3436;3986;4218;5777;6050	1.98744	0.926796	0.0335362	0.617067	0.605527	165;438;1997;2229;2779;3508;3607;4133;4860;5635;6132;6174	0.801691	0.578581	0.422705	0.977654	0.976091
Ppm1g	-0.040725	0.69014	298;746;4080;5085;5468;5673	0.887345	0.497975	0.354028	0.903344	0.903031	542;747;1130;2135;5469;5917	1.18135	0.591525	0.190457	0.880994	0.879794
Ppp2ca	-0.103974	0.794266	483;1799;4585;4797;4869;6127	0.839416	0.407308	0.390989	0.911941	0.909421	88;1346;1418;1630;4416;5732	1.4129	0.680759	0.11621	0.782293	0.782293
Ppp4c	-0.145217	0.957509	1778;2149;4581;5077;5152;6100	0.837358	0.416068	0.39271	0.913382	0.909421	115;1063;1138;1634;4066;4437	1.4094	0.820584	0.116994	0.784381	0.784381
Ppp4r2	-0.112591	0.79606	1789;2134;2493;4102;5749;6079	0.557052	0.37096	0.66731	0.990203	0.979331	136;466;2113;3722;4081;4426	1.2093	0.682315	0.179236	0.870422	0.870422
Ppp4r3a	-0.04091	0.677531	1244;3188;3716;4157;4431;5271	0.653624	0.432161	0.566728	0.970529	0.969796	944;1784;2058;2499;3027;4971	1.07363	0.58071	0.23971	0.936226	0.934628
Ppp4r3b	0.0371067	0.558547	502;868;2714;3767;4840;4916	0.794981	0.47884	0.428622	0.921816	0.918154	1299;1375;2448;3501;5347;5713	0.568508	0.386785	0.655657	1	0.991667
Prdm1	0.0266088	0.554126	952;1648;3313;3445;3770;4858	0.712268	0.47502	0.506835	0.945178	0.94497	1357;2445;2770;2902;4567;5263	0.693166	0.433446	0.526268	1	0.991667
Prdm10	0.0396638	0.612798	1642;1649;1849;2960;3866;4915	0.738434	0.525261	0.481553	0.933785	0.932939	1300;2349;3255;4366;4566;4573	0.79902	0.452814	0.425005	0.977511	0.976091
Prdm11	0.0357733	0.553473	893;1857;2238;2749;4491;4961	0.748031	0.47446	0.472242	0.927677	0.927677	1254;1724;3466;3977;4358;5322	0.522662	0.405504	0.699756	1	0.991667
Prdm12	-0.0662342	0.765148	603;1396;4905;4933;5002;5700	1.03646	0.468621	0.259483	0.847542	0.841758	515;1213;1282;1310;4819;5612	1.73395	0.655731	0.0581812	0.602175	0.601506
Prdm13	-0.0343438	0.5645	1009;1765;3181;3587;5316;5650	0.526291	0.36781	0.696673	0.989443	0.979331	565;899;2628;3034;4450;5206	0.774604	0.483923	0.446775	0.995774	0.991081
Prdm14	0.0528912	0.601819	651;923;2761;3546;4193;4586	0.791623	0.515894	0.431505	0.924414	0.918154	1629;2022;2669;3454;5292;5564	0.549029	0.38769	0.675344	1	0.991667
Prdm15	0.237792	1.86773	249;630;648;898;1196;2387	2.89289	1.59989	0.00428744	0.236667	0.236667	3828;5019;5317;5567;5585;5966	1.87343	0.90604	0.0433563	0.556574	0.556574
Prdm16	-0.0112745	0.525439	370;2246;2913;3438;3766;5996	0.713863	0.419513	0.505234	0.944321	0.944316	219;2449;2777;3302;3969;5845	0.752686	0.450477	0.467874	1	0.991667
Prdm2	0.0248694	0.641432	1688;2393;2618;3599;3744;4090	1.08989	0.549794	0.231415	0.829489	0.828937	2125;2471;2616;3597;3822;4527	0.825365	0.526034	0.402636	0.969137	0.967016
Prdm4	0.0484168	0.624527	56;1976;2531;4066;4793;5096	1.28669	0.535431	0.152306	0.759693	0.759693	1119;1422;2149;3684;4239;6159	0.635307	0.382154	0.585781	1	0.991667
Prdm5	0.00957991	0.482206	422;1673;2441;3124;5004;5649	0.625375	0.413439	0.596136	0.977428	0.976372	566;1211;3091;3774;4542;5793	0.620926	0.393351	0.600872	1	0.991667
Prdm6	-0.0137376	0.571612	539;866;2639;3175;3514;6149	0.821704	0.46755	0.405682	0.92155	0.917846	66;2701;3040;3576;5349;5676	1.21886	0.490094	0.175772	0.863733	0.863733
Prdm8	-0.0614458	0.737557	2452;2729;3281;4057;4532;5625	0.715462	0.426562	0.503773	0.942653	0.942653	590;1683;2158;2934;3486;3763	1.30702	0.632158	0.145671	0.828976	0.825283
Prdm9	0.220882	1.71718	307;323;439;443;2555;4127	3.47602	1.47063	0.00102536	0.154364	0.1337	2088;3660;5772;5776;5892;5908	2.23895	0.80873	0.0193478	0.372558	0.372558
Prkaa1	0.0484561	0.566669	188;1526;2671;3480;4069;5368	0.807773	0.485814	0.417354	0.917846	0.917846	847;2146;2735;3544;4689;6027	0.533139	0.352716	0.690558	1	0.991667
Prkaa2	0.0954153	0.795112	197;1190;1727;1889;2973;5653	1.20724	0.68146	0.179919	0.788217	0.788217	562;3242;4326;4488;5025;6018	0.722932	0.407307	0.496745	1	0.991667
Prkab1	-0.181436	1.27074	1551;4262;4589;5507;5789;5864	1.16299	0.580854	0.198077	0.798092	0.796852	351;426;708;1626;1953;4664	1.89905	1.08873	0.0408466	0.549935	0.543312
Prkab2	0.121216	0.856515	311;511;2068;2700;3809;3864	1.238	0.734069	0.168762	0.780642	0.773485	2351;2406;3515;4147;5704;5904	0.6762	0.40175	0.543639	1	0.991667
Prkag1	0.091207	0.733973	522;667;2374;2646;4000;4298	0.960629	0.629093	0.304425	0.875222	0.875222	1917;2215;3569;3841;5548;5693	0.534281	0.387908	0.689542	1	0.991667
Prkag2	0.12958	1.09145	271;308;587;1375;4846;5408	1.90245	0.935127	0.0406329	0.623037	0.6104	807;1369;4840;5628;5907;5944	1.04692	0.538866	0.253547	0.945662	0.937427
Prkag3	-0.0334507	0.717766	1520;3049;3977;4195;4317;4758	0.695681	0.482156	0.523714	0.950954	0.950954	1457;1898;2020;2238;3166;4695	0.995507	0.615164	0.28267	0.965159	0.937427
Prkca	-0.0306793	0.603439	163;1676;1954;3670;5800;5995	0.860753	0.460421	0.374337	0.917015	0.909421	220;415;2545;4261;4539;6052	1.29463	0.517281	0.149394	0.838631	0.825283
Prkcb	0.0875841	0.725222	28;1592;1900;3408;4572;5108	1.57787	0.621707	0.081657	0.662863	0.653416	1107;1643;2807;4315;4623;6187	0.517354	0.340224	0.704076	1	0.991667
Prkcd	-0.0482372	0.666865	1136;3026;3661;3712;5198;5335	0.608325	0.408051	0.614097	0.986367	0.979331	880;1017;2503;2554;3189;5079	0.983078	0.571583	0.290289	0.959517	0.937427
Prkdc	0.00284063	0.568122	424;861;4118;4410;4852;5119	0.799741	0.487049	0.424405	0.924755	0.918154	1096;1363;1805;2097;5354;5791	1.06858	0.483115	0.242227	0.93503	0.934628
Prm1	0.0775784	0.695143	813;1064;1232;2895;3959;4849	1.09515	0.595805	0.228913	0.827686	0.827686	1366;2256;3320;4983;5151;5402	0.613657	0.3989	0.608488	1	0.991667
Prm2	0.0723003	0.727639	794;2119;2320;2490;3501;3930	1.19387	0.623646	0.185438	0.79556	0.79556	2285;2714;3725;3895;4096;5421	0.65178	0.455968	0.568738	1	0.991667
Prm3	0.112865	0.813306	410;620;1940;2595;3296;4434	1.00846	0.697046	0.275312	0.860219	0.860219	1781;2919;3620;4275;5595;5805	0.582246	0.390767	0.641379	1	0.991667
Prmt1	-0.0480632	0.873316	155;190;2317;3128;6078;6145	1.90709	0.708881	0.0398998	0.629276	0.6104	70;137;3087;3898;6025;6060	2.17594	0.74834	0.0218756	0.411659	0.411659
Prmt2	0.0678286	0.63737	593;1287;2378;2944;4126;4354	0.926897	0.546345	0.326326	0.888809	0.884237	1861;2089;3271;3837;4928;5622	0.518387	0.382316	0.703163	1	0.991667
Prmt3	0.0316326	0.530119	852;1708;2019;3230;3990;5394	0.675593	0.454451	0.544211	0.956703	0.956703	821;2225;2985;4196;4507;5363	0.50716	0.3927	0.712106	1	0.991667
Prmt5	0.13172	1.08012	37;403;449;4249;4269;5216	2.22006	0.925509	0.0200495	0.544295	0.544295	999;1946;1966;5766;5812;6178	1.23808	0.483504	0.168461	0.866373	0.861369
Prmt6	-0.00437344	0.500755	812;1423;2432;2813;4663;5935	0.724244	0.403714	0.495385	0.945113	0.942653	280;1552;3402;3783;4792;5403	0.668181	0.429346	0.55176	1	0.991667
Prmt7	0.178358	1.21336	159;401;836;2038;2095;4715	1.76136	1.03965	0.0549275	0.618776	0.6104	1500;4120;4177;5379;5814;6056	1.07044	0.517402	0.241419	0.936276	0.934628
Prmt8	0.0601644	0.613782	540;1626;2368;2502;4380;4672	0.851771	0.526136	0.381192	0.914861	0.909421	1543;1835;3713;3847;4589;5675	0.555682	0.384003	0.668769	1	0.991667
Prmt9	0.160536	1.15751	387;981;1340;1667;2680;2927	1.96169	0.991848	0.0355399	0.619516	0.6104	3288;3535;4548;4875;5234;5828	1.13377	0.553203	0.210897	0.900119	0.900119
Prpf31	0.134335	0.949957	165;573;755;3404;3515;4596	1.61402	0.814079	0.075221	0.659079	0.650378	1619;2700;2811;5460;5642;6050	0.880623	0.419209	0.358984	0.943616	0.939953
Prr14	0.0204496	0.528805	738;1379;1736;3120;5191;5382	0.787296	0.453344	0.435263	0.925284	0.918154	833;1024;3095;4479;4836;5477	0.702867	0.409333	0.516286	1	0.991667
Psip1	0.166871	1.10186	108;721;823;2012;3446;3941	1.51799	0.944217	0.0926787	0.682116	0.682116	2274;2769;4203;5392;5494;6107	0.827393	0.453539	0.400944	0.969291	0.967016
Ptpn2	0.0969077	0.75155	88;1453;2020;3702;3918;4205	1.10171	0.644221	0.225838	0.823762	0.822917	2010;2297;2513;4195;4762;6127	0.560567	0.36501	0.663717	1	0.991667
Pwwp3a	0.0458635	0.580811	922;1292;2614;3433;3668;4847	0.754071	0.497881	0.46656	0.925298	0.924067	1368;2547;2782;3601;4923;5293	0.524165	0.400796	0.698492	1	0.991667
Pygo1	0.0120436	0.595054	348;1112;1360;2831;5583;5877	1.00028	0.510115	0.279995	0.869929	0.867231	338;632;3384;4855;5103;5867	0.995543	0.462678	0.282629	0.967012	0.937427
Pygo2	0.15265	1.07379	399;513;1165;1452;3478;3962	1.58069	0.920114	0.0808454	0.662772	0.653416	2253;2737;4763;5050;5702;5816	0.940554	0.489975	0.317286	0.964084	0.937427
Rad51	-0.0273437	0.693584	254;345;3888;4511;5686;5860	1.43424	0.552615	0.110955	0.720557	0.719063	355;529;1704;2327;5870;5961	1.1183	0.594522	0.217977	0.90696	0.904605
Rad54b	0.134869	0.930441	221;1115;1654;2347;2437;4319	1.47065	0.797389	0.102715	0.699984	0.699984	1896;3778;3868;4561;5100;5994	0.882903	0.428443	0.357342	0.94229	0.939953
Rad54l	0.0937176	0.801391	480;515;831;3251;4130;5172	1.50732	0.686786	0.0948901	0.686192	0.6834	1043;2085;2964;5384;5700;5735	0.82156	0.415529	0.405909	0.969965	0.969965
Rad54l2	0.0819054	0.89371	145;278;665;3538;4777;5906	1.75809	0.765818	0.0552899	0.6104	0.6104	309;1438;2677;5550;5937;6070	0.962628	0.487744	0.3031	0.959721	0.937427
Rag1	-0.138369	0.901739	2014;2664;3811;4844;5202;6097	0.573819	0.383314	0.650179	0.992347	0.979331	118;1013;1371;2404;3551;4201	1.02011	0.772842	0.268572	0.954412	0.937427
Rag2	0.0335891	0.613612	617;1528;1739;2001;5360;5378	1.12996	0.525982	0.212789	0.819484	0.81509	837;855;4214;4476;4687;5598	0.803869	0.444116	0.420769	0.9814	0.976091
Rai1	-0.0330911	0.717312	2309;2511;3666;3710;4719;4771	0.688571	0.479275	0.530958	0.955724	0.954808	1444;1496;2505;2549;3704;3906	1.20983	0.614793	0.179035	0.872006	0.870422
Rara	0.0336104	0.63118	1519;1709;1772;2305;3410;5646	0.949321	0.540988	0.311659	0.889841	0.884237	569;2805;3910;4443;4506;4696	0.729859	0.475587	0.489925	1	0.991667
Rb1	0.107428	0.825858	419;1356;2066;2556;3452;3497	1.49805	0.707804	0.0965761	0.689353	0.684814	2718;2763;3659;4149;4859;5796	0.82997	0.429698	0.398854	0.971326	0.967016
Rbbp4	-0.021691	0.519389	575;2124;2752;3473;5106;5782	0.545499	0.371713	0.678786	0.991243	0.979331	433;1109;2742;3463;4091;5640	0.66229	0.445285	0.557928	1	0.991667
Rbbp5	0.18182	1.26662	62;1271;1721;2253;2364;2424	2.45303	1.08537	0.0116594	0.410809	0.410083	3791;3851;3962;4494;4944;6153	1.48156	0.56351	0.100397	0.745552	0.730675
Rbbp7	-0.0560755	0.710919	263;3074;3803;5006;5166;5575	0.689171	0.454735	0.530372	0.956749	0.954808	640;1049;1209;2412;3141;5952	1.11371	0.6093	0.220143	0.904605	0.904605
Rbx1	-0.121396	0.894279	2233;2648;4044;4144;5641;5931	0.633227	0.409043	0.587757	0.977235	0.976372	284;574;2071;2171;3567;3982	1.15962	0.766416	0.19975	0.896439	0.893705
Rbx1-ps	-0.14345	0.749916	2648;4044;5931	0.375712	0.197338	0.763092	0.984174	0.979331	284;2171;3567	0.903565	0.562435	0.342493	0.943707	0.937427
Rcc1	-0.116491	0.869531	815;3238;3965;4443;5857;5858	0.669051	0.41838	0.550868	0.962276	0.962208	357;358;1772;2250;2977;5400	1.40597	0.745159	0.118094	0.788565	0.788565
Rcor1	0.0841402	0.684066	140;1446;2065;2335;4140;5206	0.933549	0.586379	0.321783	0.889603	0.884237	1009;2075;3880;4150;4769;6075	0.5884	0.348364	0.635024	1	0.991667
Rcor3	-0.0528016	0.688989	1864;2961;3237;4062;4430;5617	0.592123	0.409157	0.630995	0.986712	0.979331	598;1785;2153;2978;3254;4351	0.948697	0.59055	0.312048	0.958724	0.937427
Rest	-0.121553	1.10486	2936;3638;4668;4859;5199;5255	0.936275	0.577993	0.319876	0.891774	0.884237	960;1016;1356;1547;2577;3279	1.66578	0.946721	0.0673309	0.633523	0.63078
Ring1	0.13945	1.05199	699;776;964;1426;2938;4337	1.60735	0.901419	0.076465	0.652711	0.650378	1878;3277;4789;5251;5439;5516	0.957018	0.517585	0.306644	0.959928	0.937427
Riox2	0.161744	1.04385	42;944;2007;2250;2772;3893	1.4067	0.894606	0.117874	0.733835	0.722015	2322;3443;3965;4208;5271;6173	0.739716	0.416012	0.480349	1	0.991667
Rlim	-0.0178048	0.502327	316;1467;2688;3934;4620;6017	0.628865	0.390397	0.592303	0.978896	0.976372	198;1595;2281;3527;4748;5899	0.788872	0.430696	0.433995	0.985866	0.985442
Rmi1	-0.00871306	0.687489	438;732;1476;1715;5331;6155	1.34085	0.589251	0.135781	0.739651	0.736395	60;884;4500;4739;5483;5777	1.25814	0.570982	0.161751	0.847658	0.847658
Rnf168	0.0884622	0.864906	30;194;2339;3561;4895;5713	1.89015	0.741219	0.0416087	0.615214	0.6104	502;1320;2654;3876;6021;6185	0.798176	0.416884	0.425814	0.976659	0.976091
Rnf2	0.0718604	0.677944	819;1288;2486;2617;3843;4199	1.02135	0.581088	0.267905	0.84666	0.84666	2016;2372;3598;3729;4927;5396	0.562374	0.411521	0.661866	1	0.991667
Rnf20	0.0408151	0.59715	764;1119;1440;4173;4664;4879	0.947463	0.511888	0.312687	0.888182	0.884237	1336;1551;2042;4775;5096;5451	0.667997	0.414613	0.551931	1	0.991667
Rnf40	-0.218646	1.37395	3304;3678;3922;5125;6001;6062	1.14357	0.582333	0.206431	0.813929	0.810846	153;214;1090;2293;2537;2911	1.97597	1.17716	0.0346196	0.516486	0.516486
Rnf8	-0.259493	1.31518	1280;3361;3553;5412;5959;6207	0.842356	0.456586	0.38879	0.911949	0.909421	8;256;803;2662;2854;4935	2.11493	1.12696	0.0255012	0.435361	0.435361
Rps6ka3	0.109975	0.838556	689;979;1759;2204;3294;3979	1.16158	0.71866	0.198732	0.796852	0.796852	2236;2921;4011;4456;5236;5526	0.634281	0.434029	0.586792	1	0.991667
Rps6ka4	0.140012	1.02131	602;899;1246;2131;2468;3750	1.44678	0.87518	0.108024	0.718426	0.715667	2465;3747;4084;4969;5316;5613	0.868092	0.500604	0.368563	0.946264	0.946264
Rps6ka5	-0.0515093	0.585281	1080;1418;2498;4038;4569;6083	0.557267	0.359473	0.66712	0.990807	0.979331	132;1646;2177;3717;4797;5135	0.94127	0.50178	0.31685	0.964529	0.937427
Rrp8	0.0589224	0.646168	876;1740;2048;2517;3138;5224	1.01083	0.553846	0.273847	0.857259	0.857259	991;3077;3698;4167;4475;5339	0.621823	0.419611	0.599802	1	0.991667
Rsf1	0.192226	1.3116	100;774;1614;1622;1935;3153	1.91733	1.12387	0.0391739	0.629825	0.6104	3062;4280;4593;4601;5441;6115	1.17542	0.57099	0.192905	0.880028	0.880028
Ruvbl1	0.052551	0.722126	912;1086;1114;1645;4831;5661	1.39983	0.618881	0.119452	0.72725	0.722015	554;1384;4570;5101;5129;5303	0.831743	0.477487	0.397391	0.970619	0.967016
Ruvbl2	0.0552158	0.689759	19;1742;2715;2814;4962;5667	1.74312	0.59134	0.0572089	0.619203	0.617078	548;1253;3401;3500;4473;6196	0.605957	0.376604	0.616521	1	0.991667
Rybp	-0.0547582	0.640917	1326;2117;2830;4718;5180;5606	0.539241	0.373673	0.684882	0.993138	0.979331	609;1035;1497;3385;4098;4889	0.912534	0.549376	0.336193	0.945222	0.937427
Rybp-ps	-0.0881419	0.604189	1326;4718;5606	0.402187	0.229222	0.75215	0.990111	0.979331	609;1497;4889	0.878883	0.45314	0.36038	0.941309	0.939953
Safb	0.0309919	0.546447	1085;1367;2705;3109;4626;4750	0.700066	0.468447	0.519103	0.947777	0.947777	1465;1589;3106;3510;4848;5130	0.538894	0.416721	0.685152	1	0.991667
Sap130	-0.044621	0.590435	1350;2023;2812;3424;5040;5899	0.554793	0.358172	0.669696	0.990193	0.979331	316;1175;2791;3403;4192;4865	0.63773	0.506162	0.583349	1	0.991667
Sap18	-0.236795	1.5166	1304;1728;5231;5937;6067;6068	1.60491	0.686505	0.0768333	0.652492	0.650378	147;148;278;984;4487;4911	2.80658	1.29883	0.00514976	0.208	0.208
Sap18b	-0.240166	1.45483	1304;1728;5937;6067;6068	1.7612	0.617662	0.0549408	0.614743	0.6104	147;148;278;4487;4911	3.08773	1.2113	0.00251449	0.160154	0.160154
Sap25	-0.0452577	0.689005	1961;2514;3700;4097;4599;5289	0.553497	0.424803	0.670973	0.989432	0.979331	926;1616;2118;2515;3701;4254	0.987443	0.590553	0.287611	0.964138	0.937427
Sap30	0.0797049	0.706983	109;1850;2403;2924;2962;5404	1.112	0.606009	0.220895	0.820184	0.81742	811;3253;3291;3812;4365;6106	0.673814	0.378958	0.546041	1	0.991667
Sap30l	-0.0201278	0.569633	1106;1451;3883;4031;4385;5492	0.589069	0.407379	0.634292	0.989998	0.979331	723;1830;2184;2332;4764;5109	0.935111	0.488304	0.320798	0.960655	0.937427
Satb1	0.0744628	0.778193	791;2062;2764;2836;3129;3467	1.5205	0.66695	0.0922886	0.682277	0.682116	2748;3086;3379;3451;4153;5424	0.843917	0.49478	0.387409	0.960404	0.959653
Satb2	-0.0354699	0.571902	523;1255;2044;4404;5417;5971	0.667347	0.39563	0.552572	0.962208	0.962208	244;798;1811;4171;4960;5692	0.845416	0.490296	0.386143	0.958699	0.958699
Scmh1	0.120927	0.856851	339;723;2126;2140;3018;4462	1.07887	0.734347	0.237185	0.833924	0.832589	1753;3197;4075;4089;5492;5876	0.65635	0.405605	0.563923	1	0.991667
Scml2	-0.0914443	0.694971	1480;2097;2996;4037;4934;6115	0.506814	0.337144	0.712429	0.993082	0.979331	100;1281;2178;3219;4118;4735	1.05045	0.595748	0.252018	0.944213	0.937427
Scml4	0.0248057	0.541204	1289;1810;2460;2933;3875;5275	0.682876	0.463935	0.536762	0.957843	0.956045	940;2340;3282;3755;4405;4926	0.605261	0.430707	0.617286	1	0.991667
Senp1	-0.108569	1.19609	3740;4165;4416;4475;4578;5087	1.44221	0.683917	0.108906	0.715667	0.715667	1128;1637;1740;1799;2050;2475	2.39878	1.02483	0.0134275	0.317657	0.317657
Senp3	-0.149322	0.951938	2094;3283;3818;4086;4436;6179	0.683531	0.405754	0.536109	0.957709	0.956045	36;1779;2129;2397;2932;4121	1.47153	0.815884	0.102448	0.737626	0.730675
Set	-0.0963619	0.897706	2268;3216;3745;5011;5234;5334	0.662178	0.469658	0.55804	0.968673	0.966815	881;981;1204;2470;2999;3947	1.18262	0.769308	0.190024	0.888927	0.879794
Setd1a	0.0537205	0.599179	670;800;2561;2885;4476;4970	0.843883	0.513626	0.387484	0.914066	0.909421	1245;1739;3330;3654;5415;5545	0.516582	0.377535	0.704663	1	0.991667
Setd1b	-0.0502249	0.946862	3287;3326;3938;3973;4170;4405	1.13316	0.626738	0.211211	0.819124	0.81509	1810;2045;2242;2277;2889;2928	1.9608	0.811392	0.0356159	0.517368	0.517368
Setd2	-0.19789	1.23634	2794;3693;4614;4883;5373;6143	0.865719	0.511512	0.370378	0.915442	0.909421	72;842;1332;1601;2522;3421	1.55531	1.05944	0.0855399	0.681029	0.681029
Setd3	0.171819	1.32458	445;520;724;997;1974;4953	2.15451	1.13478	0.0232415	0.566	0.549222	1262;4241;5218;5491;5695;5770	1.31191	0.636797	0.144086	0.83138	0.825283
Setd4	-0.0088062	0.550068	1180;1911;2512;4253;4975;4978	0.577898	0.415475	0.645882	0.989436	0.979331	1237;1240;1962;3703;4304;5035	0.695321	0.471543	0.524075	1	0.991667
Setd5	0.204381	1.52442	36;153;327;1550;2771;5622	2.60587	1.30573	0.00832005	0.34445	0.34445	593;3444;4665;5888;6062;6179	1.47783	0.637462	0.101058	0.737233	0.730675
Setd6	-0.048251	0.739755	2005;3415;3428;3596;3955;5596	0.729343	0.463978	0.49049	0.942288	0.941426	619;2260;2619;2787;2800;4210	1.21302	0.634024	0.177655	0.867835	0.867835
Setd7	0.0270968	0.536162	744;829;2241;3722;4887;5244	0.822284	0.45965	0.405112	0.921519	0.917846	971;1328;2493;3974;5386;5471	0.581926	0.394601	0.641709	1	0.991667
Setdb1	-0.128309	1.05143	1382;2734;5139;5370;5428;5542	1.23234	0.531533	0.170529	0.775813	0.773485	673;787;845;1076;3481;4833	2.0353	0.90088	0.0301473	0.484699	0.484699
Setdb2	0.0413417	0.577955	901;1162;2340;2355;4053;5520	0.923223	0.495421	0.328733	0.888062	0.884237	695;2162;3860;3875;5053;5314	0.584016	0.39982	0.639563	1	0.991667
Setmar	-0.0245722	0.722724	2428;2653;3527;3748;4131;4774	0.705925	0.505782	0.513411	0.94678	0.945047	1441;2084;2467;2688;3562;3787	1.29046	0.619425	0.150907	0.830239	0.825283
Sf3b1	-0.0218014	0.627798	2056;2289;2744;3082;5001;5241	0.637162	0.438716	0.583734	0.979396	0.976372	974;1214;3133;3471;3926;4159	1.04629	0.538136	0.254105	0.943493	0.937427
Sf3b3	-0.248595	1.47918	1403;4282;4322;5683;6036;6128	1.17681	0.614557	0.192424	0.800638	0.79564	87;179;532;1893;1933;4812	2.01796	1.26714	0.0316051	0.493755	0.492785
Sfmbt1	-0.0640987	0.804349	2908;3059;3223;3650;4296;5687	0.921968	0.475411	0.329453	0.884237	0.884237	528;1919;2565;2992;3156;3307	1.64362	0.689367	0.0705121	0.645127	0.645127
Sfmbt2	-0.0240559	0.623436	1636;2721;3057;4004;4188;5243	0.565403	0.429402	0.658756	0.993534	0.979331	972;2027;2211;3158;3494;4579	0.830893	0.534385	0.397982	0.97063	0.967016
Sfpq	-0.10784	1.0104	3347;3544;4096;4145;4816;5651	1.17028	0.535265	0.195099	0.795773	0.795773	564;1399;2070;2119;2671;2868	2.01475	0.865842	0.0318406	0.492785	0.492785
Sgf29	-0.251627	1.51091	3647;3687;4641;5250;5742;6167	1.37301	0.621501	0.126524	0.727514	0.726459	48;473;965;1574;2528;2568	2.30266	1.29458	0.0165845	0.347646	0.347646
Shprh	0.15583	1.06678	149;371;737;2672;3022;4881	1.64117	0.914108	0.0711643	0.643978	0.643587	1334;3193;3543;5478;5844;6066	0.895892	0.448578	0.347967	0.9431	0.937427
Sin3a	-0.108448	0.838662	2051;2613;2941;4295;5808;5867	0.573079	0.399343	0.650897	0.990704	0.979331	348;407;1920;3274;3602;4164	1.30914	0.718758	0.145106	0.834361	0.825283
Sin3b	-0.270846	1.70133	2239;4587;4952;5737;6016;6093	1.41553	0.736431	0.115585	0.736185	0.722015	122;199;478;1263;1628;3976	2.26237	1.45736	0.0180181	0.363878	0.363878
Sirt1	-0.0701991	0.675728	1359;2573;3422;4048;5272;5785	0.518611	0.360473	0.703004	0.987425	0.979331	430;943;2167;2793;3642;4856	0.765106	0.579205	0.455769	0.999674	0.991667
Sirt2	0.128974	0.977006	341;1763;1861;2285;2392;3417	1.55836	0.837254	0.0850242	0.654884	0.654884	2798;3823;3930;4354;4452;5874	0.905009	0.500294	0.341511	0.945722	0.937427
Sirt3	-0.0208803	0.680463	833;856;1500;1719;5195;6156	1.33757	0.554148	0.136536	0.738902	0.736395	59;1020;4496;4715;5359;5382	1.26508	0.583361	0.159537	0.841382	0.839689
Sirt4	0.0316991	0.764307	453;512;762;4931;5266;5490	1.60367	0.655034	0.0769771	0.650378	0.650378	725;949;1284;5453;5703;5762	1.05496	0.541142	0.249437	0.945236	0.937427
Sirt5	0.0492274	0.649947	679;2523;2585;3232;3612;4176	1.03566	0.557104	0.259844	0.843729	0.841758	2039;2603;2983;3630;3692;5536	0.744023	0.45204	0.476089	1	0.991667
Sirt6	-0.124153	1.013	105;4108;4457;4907;5633;6063	1.06304	0.56978	0.245057	0.838459	0.836148	152;582;1308;1758;2107;6110	1.75023	0.868052	0.0560845	0.595359	0.591885
Sirt7	-0.0489905	0.601671	1261;2226;3171;3835;4722;5893	0.505703	0.352994	0.713566	0.992997	0.979331	322;1493;2380;3044;3989;4954	0.648239	0.515779	0.572257	1	0.991667
Slbp	-0.00170683	0.622978	1620;1930;3456;4156;4315;4346	0.931689	0.4874	0.323095	0.887307	0.884237	1869;1900;2059;2759;4285;4595	0.786514	0.533983	0.436019	0.986404	0.986033
Slf1	0.087811	0.732841	808;970;1624;2208;3737;4779	1.00272	0.628098	0.278486	0.866865	0.866865	1436;2478;4007;4591;5245;5407	0.619332	0.404245	0.60246	1	0.991667
Smarca1	0.0838639	0.758542	211;725;1038;2948;3669;5801	1.26862	0.650131	0.158165	0.765854	0.763977	414;2546;3267;5177;5490;6004	0.696266	0.397368	0.523047	1	0.991667
Smarca2	0.169642	1.2059	326;680;913;1083;3083;3928	2.02522	1.03323	0.0307114	0.612747	0.605527	2287;3132;5132;5302;5535;5889	1.22566	0.550901	0.172994	0.868115	0.861369
Smarca4	-0.442737	3.03946	5142;5522;5688;5951;5970;6200	3.11997	1.46534	0.00229227	0.172545	0.172545	15;245;264;527;693;1073	4.57663	2.60251	7.85024e-05	0.01625	0.01625
Smarca5	-0.0484273	0.680165	1913;2753;3342;3898;4866;5371	0.547717	0.41151	0.6766	0.989797	0.979331	844;1349;2317;2873;3462;4302	0.958205	0.582987	0.305981	0.961488	0.937427
Smarcad1	0.00237838	0.650111	1468;2570;3695;3709;3982;4240	0.996032	0.520391	0.282478	0.871106	0.867413	1975;2233;2506;2520;3645;4747	0.84354	0.557213	0.387686	0.959653	0.959653
Smarcal1	-0.179898	1.16139	2818;3658;4226;4695;5657;6066	0.877297	0.494492	0.361716	0.904837	0.904837	149;558;1520;1989;2557;3397	1.57365	0.995214	0.0822754	0.674495	0.674495
Smarcb1	-0.195929	1.36146	3655;4124;4143;4446;5883;6006	1.37884	0.615818	0.12489	0.730806	0.726459	209;332;1769;2072;2091;2560	2.31079	1.16651	0.0164034	0.357421	0.347646
Smarcc1	0.105362	0.864756	186;358;1705;1800;5037;5140	1.40597	0.741102	0.118094	0.732449	0.722015	1075;1178;4415;4510;5857;6029	0.759312	0.423338	0.461272	1	0.991667
Smarcc2	0.197141	1.40406	317;563;687;1646;2049;3122	1.80475	1.20295	0.0499106	0.621444	0.6104	3093;4166;4569;5528;5652;5898	1.09938	0.642769	0.226872	0.914112	0.913841
Smarcd1	-0.552402	4.48365	5936;5985;6047;6057;6094;6176	5.98836	2.44045	2.41546e-06	0.004	0.004	39;121;158;168;230;279	8.0866	3.83382	0	0	0
Smarcd2	0.0435984	0.594154	432;1424;3261;3753;4234;4384	0.909004	0.509342	0.338645	0.891568	0.890742	1831;1981;2462;2954;4791;5783	0.676059	0.406708	0.543772	1	0.991667
Smarcd3	0.00716227	0.555136	1725;1945;2796;3035;4026;5245	0.65092	0.456877	0.569699	0.971598	0.971598	970;2189;3180;3419;4270;4490	0.846749	0.475887	0.38514	0.959086	0.958699
Smarce1	-0.1498	1.15727	1533;3967;5065;5252;5323;5755	1.1645	0.561143	0.197564	0.797966	0.796852	460;892;963;1150;2248;4682	1.93236	0.991558	0.0381039	0.539316	0.535345
Smarce1-ps1	-0.349381	1.13061	5755	0.0333259	0.016663	0.97018	0.993579	0.993376	460	1.13061	0.565307	0.212234	0.903496	0.903496
Smc1a	-0.0460169	0.573996	516;2011;3491;4043;4761;5977	0.525205	0.359392	0.697639	0.989966	0.979331	238;1454;2172;2724;4204;5699	0.757657	0.492073	0.462889	1	0.991667
Smc1b	-0.0804899	0.851725	2647;3184;3602;4537;4828;5403	0.797807	0.468966	0.426097	0.922374	0.918154	812;1387;1678;2613;3031;3568	1.44568	0.729935	0.108197	0.752832	0.752832
Smc2	-0.148483	0.915075	862;1327;4527;5064;5114;6181	0.810421	0.407451	0.414973	0.922411	0.917846	34;1101;1151;1688;4888;5353	1.49565	0.784286	0.0972995	0.742525	0.730675
Smc3	-0.252037	1.55237	1039;3235;5068;5939;6041;6101	1.61062	0.675439	0.0756908	0.656251	0.650378	114;174;276;1147;2980;5176	2.81555	1.32955	0.00506643	0.20975	0.208
Smc4	-0.0752754	0.770418	150;2270;2434;2977;6045;6070	0.892189	0.503618	0.35068	0.898957	0.898957	145;170;3238;3781;3945;6065	1.99794	0.660172	0.0329155	0.495527	0.495527
Smyd1	0.0452239	0.61669	252;882;3703;3853;4388;4836	0.785639	0.528664	0.436774	0.923752	0.918154	1379;1827;2362;2512;5333;5963	0.847185	0.407383	0.384902	0.959937	0.958699
Smyd2	-0.0661583	0.751144	2367;2499;2678;2970;5568;5722	0.682267	0.435786	0.537397	0.957944	0.956045	493;647;3245;3537;3716;3848	1.24882	0.643808	0.164874	0.858591	0.858591
Smyd3	0.00676743	0.565382	1385;2234;3177;3601;4056;4766	0.691303	0.46237	0.528136	0.956886	0.954808	1449;2159;2614;3038;3981;4830	0.656545	0.484647	0.563772	1	0.991667
Smyd4	0.0733469	0.707885	763;1348;2536;3280;3432;3834	1.25831	0.606739	0.161478	0.772855	0.771931	2381;2783;2935;3679;4867;5452	0.687623	0.431536	0.531893	1	0.991667
Smyd5	-0.0851687	0.831463	1971;2640;4412;4422;5291;5391	0.758027	0.442821	0.462559	0.927358	0.924067	824;924;1793;1803;3575;4244	1.27108	0.712569	0.157523	0.841477	0.839689
Snai2	0.0251328	0.593543	253;2932;3249;3732;3743;5058	0.723104	0.508816	0.496511	0.945083	0.942653	1157;2472;2483;2966;3283;5962	0.933706	0.453928	0.321593	0.957838	0.937427
Snapc3	0.459768	1.75995	108	1.75995	0.879974	0.0550797	0.612161	0.6104	6107	0.00754333	0.00377166	0.993001	0.997216	0.997216
Snd1	0.155632	1.08005	112;1023;1129;1365;2597;5005	1.6723	0.925513	0.0665217	0.655714	0.643587	1210;3618;4850;5086;5192;6103	0.997529	0.472449	0.281693	0.971842	0.937427
Sp1	-0.0800489	0.761325	1845;1908;3987;4670;5350;5579	0.614098	0.404173	0.608069	0.983361	0.979331	636;865;1545;2228;4307;4370	0.991401	0.65251	0.285263	0.966045	0.937427
Sp100	0.0251434	0.635646	1185;2390;3399;3465;3718;4045	1.11872	0.544843	0.217748	0.817664	0.81742	2170;2497;2750;2816;3825;5030	0.723159	0.51532	0.496455	1	0.991667
Sp110	0.0991875	0.813184	13;1658;2135;2427;3746;5723	1.90582	0.697063	0.0404251	0.625645	0.6104	492;2469;3788;4080;4557;6202	0.569295	0.362065	0.654879	1	0.991667
Sp140	-0.0845214	0.725989	1397;1755;2607;4278;5813;5924	0.55693	0.375399	0.667459	0.989536	0.979331	291;402;1937;3608;4460;4818	1.31838	0.622253	0.142071	0.834291	0.825283
Spen	0.0987078	0.745419	231;1671;1783;2685;3407;4539	0.871973	0.638916	0.365686	0.912012	0.909421	1676;2808;3530;4432;4544;5984	0.558363	0.375391	0.665994	1	0.991667
Spop	0.0202026	0.712463	1865;3042;3073;3087;3218;4179	1.03379	0.610625	0.260976	0.845746	0.841758	2036;2997;3128;3142;3173;4350	0.991709	0.602299	0.284975	0.969031	0.937427
Srcap	-0.0543068	0.683029	887;2436;4375;4466;4568;5597	0.742518	0.412126	0.477575	0.930428	0.930428	618;1647;1749;1840;3779;5328	1.24311	0.585419	0.166884	0.863625	0.861369
Srsf1	-0.114679	0.841426	1544;2137;3579;5045;5692;5908	0.637063	0.388901	0.583907	0.978694	0.976372	307;523;1170;2636;4078;4671	1.14631	0.721125	0.205077	0.893705	0.893705
Srsf3	0.142632	1.1827	58;125;470;2951;4316;5762	2.25213	1.0131	0.0183889	0.525034	0.523525	453;1899;3264;5745;6090;6157	1.20463	0.530478	0.181041	0.87662	0.874618
Ss18l1	-0.0644806	0.795119	1820;3675;3920;3932;4260;5539	0.834971	0.467575	0.394632	0.91145	0.909421	676;1955;2283;2295;2540;4395	1.39277	0.681435	0.121339	0.80055	0.797039
Ss18l2	-0.140605	0.868424	754;2187;2504;4899;5871;6158	0.603222	0.381585	0.619501	0.98929	0.979331	57;344;1316;3711;4028;5461	1.43647	0.744289	0.110498	0.765623	0.765457
Ssrp1	-0.192026	1.61053	40;2189;5775;5962;5997;6029	2.24715	0.95334	0.0186522	0.523525	0.523525	186;218;253;440;4026;6175	3.48737	1.37897	0.00100845	0.128462	0.125
Stk31	0.0594652	0.640405	669;2008;2362;2684;3273;4884	0.938851	0.548922	0.318297	0.891878	0.884237	1331;2942;3531;3853;4207;5546	0.587598	0.411781	0.635855	1	0.991667
Stk4	0.132551	0.934349	179;1459;1563;2330;2334;4453	1.55274	0.800735	0.0859662	0.656037	0.656037	1762;3881;3885;4652;4756;6036	0.93459	0.435922	0.321176	0.960051	0.937427
Suds3	-0.275279	1.83021	2713;3245;5809;5824;5855;6089	2.34453	0.832412	0.0149698	0.476731	0.476731	126;360;391;406;2970;3502	3.62198	1.5674	0.000708937	0.106727	0.102167
Supt16	0.117831	0.904087	120;325;1490;2211;3495;5718	1.4802	0.774786	0.100604	0.691286	0.691286	497;2720;4004;4725;5890;6095	0.620955	0.410315	0.600777	1	0.991667
Supt3	-0.0662484	0.641175	258;2530;3349;3586;5102;6124	0.695683	0.383301	0.52368	0.951936	0.950954	91;1113;2629;2866;3685;5957	1.08821	0.549651	0.232426	0.925236	0.92341
Supt6	-0.0749551	0.698579	340;531;2349;3985;5110;6198	1.11564	0.456655	0.219315	0.819833	0.81742	17;1105;2230;3866;5684;5875	1.79072	0.598931	0.0515857	0.614576	0.591885
Supt7l	0.00511722	0.703143	1977;2716;3370;3654;3831;3971	1.16683	0.568299	0.196486	0.7975	0.796852	2244;2384;2561;2845;3499;4238	0.997262	0.602643	0.281797	0.970179	0.937427
Supv3l1	-0.173448	1.23608	3121;3730;3884;5247;5812;5830	1.03588	0.563052	0.259713	0.846622	0.841758	385;403;968;2331;2485;3094	1.81711	1.05912	0.0484094	0.589456	0.589456
Suv39h1	-0.0218224	0.57609	329;2414;3389;4652;4994;5352	0.616148	0.421489	0.605885	0.983673	0.979331	863;1221;1563;2826;3801;5886	0.874682	0.493818	0.363714	0.947028	0.946264
Suv39h2	0.0591794	0.66809	441;783;1341;4350;4646;4811	1.01352	0.572669	0.272401	0.85597	0.85597	1404;1569;1865;4874;5432;5774	0.731993	0.409249	0.487894	1	0.991667
Suz12	-0.0495778	0.87194	2540;3381;4007;4220;4378;4454	0.867726	0.564418	0.368941	0.913253	0.909421	1761;1837;1995;2208;2834;3675	1.36868	0.747224	0.127574	0.806344	0.801068
Syncrip	0.190958	1.31791	25;47;1751;3468;3556;4132	3.07964	1.12836	0.00256522	0.184696	0.184696	2083;2659;2747;4464;6168;6190	1.3686	0.502151	0.127925	0.80549	0.801068
Tada1	-0.0449654	0.592125	825;2185;2879;4710;4796;5770	0.537557	0.365921	0.68646	0.991088	0.979331	445;1419;1505;3336;4030;5390	0.907802	0.507582	0.339455	0.943185	0.937427
Tada2a	-0.0487886	0.652035	1732;1747;3725;4246;4930;5501	0.557744	0.393489	0.666662	0.991016	0.979331	714;1285;1969;2490;4468;4483	0.85732	0.558898	0.376885	0.954315	0.953756
Tada2b	-0.0408473	0.634404	1932;2116;3176;4041;4707;5511	0.537836	0.394799	0.686196	0.992437	0.979331	704;1508;2174;3039;4099;4283	0.969739	0.543798	0.298591	0.960128	0.937427
Tada3	-0.0814764	0.777238	1447;3037;4079;4245;5389;5478	0.639343	0.414516	0.581505	0.980623	0.976372	737;826;1970;2136;3178;4768	1.04484	0.666126	0.254891	0.942187	0.937427
Taf1	0.0615162	0.712546	15;1065;2295;4068;5109;5599	1.84438	0.610885	0.0460459	0.635433	0.6104	616;1106;2147;3920;5150;6200	0.663622	0.377659	0.556448	1	0.991667
Taf10	-0.153744	1.18324	925;3957;5265;5297;5436;5833	1.3632	0.582914	0.129179	0.727619	0.726459	382;779;918;950;2258;5290	2.23061	1.01376	0.0196763	0.374529	0.374529
Taf12	-0.158671	0.99479	674;733;1738;5100;5844;6208	0.898489	0.480523	0.346111	0.895562	0.89547	7;371;1115;4477;5482;5541	2.17257	0.852641	0.0224384	0.417506	0.417506
Taf2	-0.371456	2.23691	4018;4477;5475;5721;6071;6194	1.6699	0.959768	0.0668056	0.650765	0.643587	21;144;494;740;1738;2197	2.70925	1.91595	0.00680918	0.24513	0.242327
Taf3	0.0220013	0.552776	1268;2036;2800;3457;3865;4778	0.684751	0.473855	0.534971	0.957743	0.956045	1437;2350;2758;3415;4179;4947	0.594176	0.451897	0.628815	1	0.991667
Taf4	-0.0216858	0.582231	621;2442;3805;3993;4948;5135	0.572623	0.41658	0.651414	0.989672	0.979331	1080;1267;2222;2410;3773;5594	0.895587	0.499077	0.348099	0.941915	0.937427
Taf5	-0.0783752	0.716329	1008;2284;4019;4855;4856;5872	0.62254	0.378006	0.59903	0.976372	0.976372	343;1359;1360;2196;3931;5207	1.00959	0.61397	0.274495	0.965104	0.937427
Taf5l	-0.0812485	0.759333	659;3522;4105;4209;5137;5822	0.770257	0.415194	0.450861	0.925187	0.921884	393;1078;2006;2110;2693;5556	1.28423	0.650792	0.152996	0.825283	0.825283
Taf6	0.0449149	0.56935	779;1149;2132;2929;3789;5480	0.704741	0.488059	0.514681	0.945962	0.945047	735;2426;3286;4083;5066;5436	0.509482	0.380413	0.710215	1	0.991667
Taf6l	-0.203793	1.7	4402;4733;5010;5196;5526;5573	2.04764	0.877025	0.0294686	0.617722	0.605527	642;689;1019;1205;1482;1813	3.20984	1.4563	0.00185507	0.1536	0.146952
Taf7	-0.26997	1.3306	1062;1364;3742;5388;6117;6209	1.06261	0.488218	0.245391	0.836148	0.836148	6;98;827;2473;4851;5153	2.45581	1.13988	0.0116014	0.300187	0.300187
Taf8	-0.493085	3.07862	3873;3935;6022;6148;6151;6204	3.27007	1.40181	0.00161473	0.1337	0.1337	11;64;67;193;2280;2342	4.88257	2.63311	3.86473e-05	0.0106667	0.0106667
Taf9	0.0728682	0.631417	322;1429;1819;2866;4217;4939	0.750823	0.541258	0.469582	0.924647	0.924647	1276;1998;3349;4396;4786;5893	0.513078	0.3519	0.707377	1	0.991667
Taf9b	-0.0542424	0.906167	3156;3434;3698;3756;4548;4674	1.05575	0.580391	0.248915	0.84468	0.841758	1541;1667;2459;2517;2781;3059	1.84675	0.776544	0.0454674	0.561896	0.561896
Tasor	-0.121788	0.977308	1537;2745;4624;5402;5418;5607	0.859953	0.48091	0.374921	0.91709	0.909421	608;797;813;1591;3470;4678	1.5315	0.837445	0.090099	0.707128	0.701738
Tbl1xr1	0.0625906	0.617378	538;1333;1472;3045;3877;5337	0.927589	0.529205	0.325679	0.888507	0.884237	878;2338;3170;4743;4882;5677	0.544698	0.370842	0.679516	1	0.991667
Tbp	0.0612597	0.708034	123;989;1015;4303;4963;5384	1.29204	0.606913	0.150458	0.752743	0.752743	831;1252;1912;5200;5226;6092	0.713723	0.411938	0.505465	1	0.991667
Tdg	0.0166826	0.517788	772;1851;2686;4191;4302;4829	0.657084	0.443905	0.563176	0.970468	0.967039	1386;1913;2024;3529;4364;5443	0.673924	0.42545	0.545925	1	0.991667
Tdrd1	0.0841981	0.911864	1338;2228;2267;2539;2829;2957	1.93512	0.78142	0.0378853	0.640184	0.6104	3258;3386;3676;3948;3987;4877	1.1156	0.590655	0.219359	0.910421	0.904605
Tdrd12	0.161413	1.07352	126;1121;1282;2173;2480;3764	1.43764	0.91996	0.110239	0.718724	0.718724	2451;3735;4042;4933;5094;6089	0.862449	0.464778	0.372925	0.953031	0.953031
Tdrd3	0.143834	0.956954	49;1518;1638;2533;3306;3817	1.34221	0.820174	0.135361	0.742245	0.736395	2398;2909;3682;4577;4697;6166	0.694185	0.400088	0.52524	1	0.991667
Tdrd5	-0.0955513	0.836661	706;3411;3947;5124;5424;5615	0.72788	0.444007	0.491928	0.941771	0.941771	600;791;1091;2268;2804;5509	1.21715	0.717002	0.176366	0.864089	0.864089
Tdrd6	0.0418244	0.595678	1220;1566;1873;2501;4623;4920	0.852232	0.510605	0.380855	0.919382	0.909421	1295;1592;3714;4342;4649;4995	0.569015	0.427964	0.655098	1	0.991667
Tdrd7	0.1264	0.931542	295;618;632;2666;3754;4917	1.81668	0.798252	0.0488514	0.622292	0.6104	1298;2461;3549;5583;5597;5920	0.996607	0.431693	0.282156	0.967391	0.937427
Tdrd9	0.0978351	0.821814	993;1153;1257;2033;3991;4112	1.10903	0.704298	0.222268	0.817947	0.81742	2103;2224;4182;4958;5062;5222	0.671274	0.4577	0.548585	1	0.991667
Tdrkh	-0.074642	0.692867	1841;2231;2322;4357;4636;6052	0.591092	0.371766	0.632181	0.987634	0.979331	163;1579;1858;3893;3984;4374	0.914955	0.593929	0.334362	0.956311	0.937427
Tet1	-0.00290648	0.666169	1661;2629;3607;3720;4128;4229	1.0028	0.518741	0.278448	0.86838	0.866865	1986;2087;2495;2608;3586;4554	0.809869	0.570972	0.415478	0.982903	0.976091
Tet2	0.116477	0.985969	288;429;1134;1995;2383;5843	1.51314	0.844879	0.0934771	0.684947	0.683322	372;3832;4220;5081;5786;5927	0.909518	0.498024	0.338298	0.946321	0.937427
Tet3	0.0329088	0.547965	769;1584;1710;2773;4259;5609	0.799414	0.469736	0.424669	0.922903	0.918154	606;1956;3442;4505;4631;5446	0.520385	0.394626	0.701593	1	0.991667
Tex10	0.149156	1.24508	90;354;543;1775;2328;5944	1.99382	1.06674	0.0331932	0.617618	0.605527	271;3887;4440;5672;5861;6125	1.10119	0.588602	0.226155	0.915677	0.913841
Tfdp1	0.0365425	0.550004	768;1214;2444;2965;3701;5569	0.740288	0.471487	0.479757	0.931393	0.931393	646;2514;3250;3771;5001;5447	0.510599	0.38722	0.709322	1	0.991667
Tfpt	-0.00253394	0.533441	1043;1391;3316;4286;4489;5099	0.564213	0.422394	0.659918	0.991673	0.979331	1116;1726;1929;2899;4824;5172	0.707348	0.457297	0.511959	1	0.991667
Tle1	-0.0544889	0.634508	1228;1590;2371;3132;5638;5975	0.623184	0.385313	0.598324	0.978109	0.976372	240;577;3083;3844;4625;4987	1.05759	0.543921	0.248058	0.942165	0.937427
Tle2	-0.0570023	0.845771	2789;3130;3915;4055;4399;4979	0.863325	0.523396	0.372211	0.917235	0.909421	1236;1816;2160;2300;3085;3426	1.5515	0.724819	0.0861304	0.68245	0.68245
Tle4	0.0582537	0.616648	786;790;2071;2674;4196;5257	0.851603	0.528576	0.38145	0.914156	0.909421	958;2019;3541;4144;5425;5429	0.530823	0.379803	0.6927	1	0.991667
Tlk1	0.04105	0.620386	1323;1952;2000;2273;4549;4742	0.966526	0.531763	0.300745	0.881476	0.874557	1473;1666;3942;4215;4263;4892	0.623309	0.456675	0.598256	1	0.991667
Tlk2	-0.0588171	0.730481	183;3051;3214;5197;5482;5621	0.817679	0.475704	0.409048	0.922866	0.917846	594;733;1018;3001;3164;6032	1.28895	0.62605	0.151408	0.827498	0.825283
Tnp1	0.115327	0.92965	677;1511;1539;1599;2417;4588	1.48625	0.796643	0.0990676	0.689311	0.689311	1627;3798;4616;4676;4704;5538	0.892639	0.497564	0.350188	0.938369	0.937427
Tnp2	0.197994	1.46874	335;801;1045;1325;1993;2365	2.51724	1.25835	0.0103406	0.398233	0.394227	3850;4222;4890;5170;5414;5880	1.52838	0.705437	0.0906836	0.701738	0.701738
Tonsl	-0.0192761	0.561731	246;1205;4039;4095;4336;5968	0.711997	0.439172	0.507293	0.94497	0.94497	247;1879;2120;2176;5010;5969	1.02117	0.48156	0.268056	0.956681	0.937427
Top2a	0.0372486	0.554574	286;1514;1730;2959;4755;5679	0.790062	0.475435	0.432949	0.925115	0.918154	536;1460;3256;4485;4701;5929	0.547194	0.371771	0.677168	1	0.991667
Top2b	-0.0370475	0.785885	133;805;998;5451;5593;6077	1.30979	0.638608	0.144665	0.743994	0.742098	138;622;764;5217;5410;6082	1.60073	0.673567	0.0774227	0.67837	0.668357
Trim16	0.18975	1.30942	72;545;2203;2214;2344;2465	2.40933	1.12202	0.0132307	0.4382	0.4382	3750;3871;4001;4012;5670;6143	1.44984	0.570079	0.107087	0.751424	0.751424
Trim24	-0.220209	1.70103	4496;4618;4932;5230;5246;5981	2.15413	0.839211	0.023256	0.558145	0.549222	234;969;985;1283;1597;1719	3.34857	1.45723	0.00134179	0.138875	0.138875
Trim27	0.00836294	0.470386	547;1594;2881;3904;4584;5415	0.520592	0.403307	0.701463	0.989457	0.979331	800;1631;2311;3334;4621;5668	0.593602	0.398421	0.62944	1	0.991667
Trim28	0.0519087	0.606529	492;1640;2897;3660;3735;4449	0.870653	0.519932	0.36662	0.912965	0.909421	1766;2480;2555;3318;4575;5723	0.577034	0.400685	0.646833	1	0.991667
Trim33	-0.239579	2.08892	5030;5220;5263;5284;5406;5680	2.91375	1.1191	0.00416546	0.246357	0.236667	535;809;931;952;995;1185	4.31792	1.7891	0.000134058	0.0246667	0.0246667
Trim66	0.0350586	0.589341	77;1290;3016;4258;4435;5540	1.1558	0.505276	0.201344	0.803436	0.802508	675;1780;1957;3199;4925;6138	0.697114	0.382315	0.522237	1	0.991667
Trrap	0.12977	0.989846	167;933;1046;2087;2153;5562	1.70822	0.848235	0.0614976	0.632547	0.632547	653;4062;4128;5169;5282;6048	1.03529	0.470318	0.260045	0.944373	0.937427
Tspyl2	0.142062	0.959068	89;465;2477;2743;3165;4013	1.21086	0.821951	0.178737	0.789301	0.787596	2202;3050;3472;3738;5750;6126	0.622454	0.402966	0.599156	1	0.991667
Tssk6	0.052748	0.665546	94;493;2826;4153;4633;5543	1.16855	0.570531	0.195806	0.796693	0.796693	672;1582;2062;3389;5722;6121	0.661559	0.389152	0.558633	1	0.991667
Ttk	-0.0922698	0.703582	880;2054;3648;4717;4807;6088	0.545263	0.349568	0.67901	0.989824	0.979331	127;1408;1498;2567;4161;5335	0.956256	0.603096	0.3073	0.956556	0.937427
Tyw5	-0.0363731	0.572458	968;2264;2893;3924;4076;5955	0.600898	0.371112	0.621889	0.990238	0.979331	260;2139;2291;3322;3951;5247	0.693059	0.490756	0.526383	1	0.991667
Uba2	-0.084379	0.79594	268;736;2694;3135;6035;6153	0.895892	0.511571	0.347967	0.896165	0.896165	62;180;3080;3521;5479;5947	1.95117	0.682106	0.0363502	0.523443	0.523443
Ube2a	0.0248507	0.526256	541;1923;2083;2703;4991;5396	0.76589	0.45116	0.455134	0.927063	0.924067	819;1224;3512;4132;4292;5674	0.616171	0.400991	0.605822	1	0.991667
Ube2b	-0.132224	0.987066	338;4032;4666;4697;5308;6082	1.01768	0.499943	0.269972	0.85157	0.851555	133;907;1518;1549;2183;5877	1.68139	0.845855	0.0649952	0.629427	0.626256
Ube2d1	0.113036	1.01199	1427;1543;1554;1859;2542;3346	1.61307	0.867171	0.0753647	0.656863	0.650378	2869;3673;4356;4661;4672;4788	0.902365	0.589271	0.343483	0.944864	0.937427
Ube2d3	0.122028	0.909534	527;1028;1315;1698;2835;4765	1.35488	0.779431	0.131504	0.728328	0.728328	1450;3380;4517;4900;5187;5688	0.805602	0.452244	0.419226	0.984735	0.976091
Ube2e1	0.027057	0.607615	1482;2263;2544;3409;4003;4250	0.989894	0.52083	0.286198	0.868029	0.868029	1965;2212;2806;3671;3952;4733	0.709408	0.488198	0.509804	1	0.991667
Ube2h	-0.103672	0.758172	1681;2242;2545;4689;4813;6131	0.548491	0.357396	0.675855	0.990457	0.979331	84;1402;1526;3670;3973;4534	1.12049	0.649889	0.217064	0.907722	0.904605
Ube2i	0.0123578	0.740256	113;219;3291;4857;5319;5838	1.79209	0.634437	0.0511135	0.613362	0.6104	377;896;1358;2924;5996;6102	1.00166	0.548645	0.279296	0.965582	0.937427
Ube2n	0.129729	0.910797	447;572;1270;2333;3226;4383	1.06555	0.780535	0.243883	0.837905	0.836148	1832;2989;3882;4945;5643;5768	0.600548	0.423016	0.622286	1	0.991667
Ube2t	0.0302502	0.579418	189;608;2910;3517;4723;5835	1.02172	0.496731	0.267848	0.848099	0.84666	380;1492;2698;3305;5607;6026	0.579963	0.393676	0.643708	1	0.991667
Ubn1	-0.113453	0.817183	1109;3583;3685;3906;4910;6113	0.795159	0.384027	0.42836	0.92245	0.918154	102;1305;2309;2530;2632;5106	1.32652	0.700406	0.139647	0.825914	0.825283
Ubr2	-0.110512	0.87265	281;2372;3255;5559;5767;5991	0.971667	0.466386	0.297469	0.881231	0.874557	224;448;656;2960;3843;5934	1.77373	0.747796	0.0533068	0.617315	0.591885
Ubr5	-0.000712926	0.570057	1052;1883;3386;4381;4448;4637	0.762805	0.449762	0.45787	0.928069	0.924067	1578;1767;1834;2829;4332;5163	0.744577	0.488649	0.475652	1	0.991667
Ubr7	0.0117141	0.496508	988;2070;2369;3782;4368;5131	0.580813	0.424939	0.642855	0.992142	0.979331	1084;1847;2433;3846;4145;5227	0.578693	0.42566	0.645116	1	0.991667
Uchl5	-0.190427	1.52922	2275;4992;5314;5346;5488;5620	1.8393	0.76979	0.0464324	0.625138	0.6104	595;727;869;901;1223;3940	2.84676	1.30998	0.00472343	0.205842	0.205842
Uhrf1	-0.0892629	0.844616	1291;1953;4760;5063;5278;5499	0.938683	0.456386	0.318396	0.890649	0.884237	716;937;1152;1455;4262;4924	1.57765	0.723803	0.0816715	0.679638	0.674495
Uhrf2	0.099543	0.763555	384;1318;2022;2888;2918;4373	1.13866	0.654435	0.208692	0.81508	0.81508	1842;3297;3327;4193;4897;5831	0.688153	0.396393	0.531374	1	0.991667
Uimc1	-0.014381	0.606379	1914;1988;3075;3604;4799;4940	0.597866	0.438402	0.625072	0.988653	0.979331	1275;1416;2611;3140;4227;4301	0.958811	0.51978	0.305607	0.962141	0.937427
Usp11	-0.0780185	0.673617	1145;1771;3541;4560;5187;5969	0.530823	0.348346	0.6927	0.987188	0.979331	246;1028;1655;2674;4444;5070	0.826195	0.577415	0.401911	0.97021	0.967016
Usp12	0.00224183	0.608207	1611;2625;3104;3118;3455;5249	0.849084	0.486685	0.383391	0.912207	0.909421	966;2760;3097;3111;3590;4604	0.78764	0.521336	0.434999	0.985442	0.985442
Usp15	-0.0570478	0.611304	596;1970;2754;3048;5552;6043	0.647055	0.374834	0.573511	0.973088	0.972966	172;663;3167;3461;4245;5619	0.963624	0.524048	0.30249	0.961466	0.937427
Usp16	0.196481	1.29141	95;210;1175;2290;3094;3219	1.82593	1.1065	0.0476171	0.630832	0.6104	2996;3121;3925;5040;6005;6120	0.967604	0.520648	0.300075	0.959313	0.937427
Usp21	-0.027914	0.583517	391;2351;3008;4843;5078;5411	0.569603	0.413282	0.654493	0.988004	0.979331	804;1137;1372;3207;3864;5824	0.992061	0.500182	0.284772	0.970333	0.937427
Usp22	-0.0655481	0.73938	2262;2784;2805;3439;5453;5576	0.643499	0.423761	0.577221	0.97738	0.976372	639;762;2776;3410;3431;3953	1.17867	0.633723	0.191434	0.880594	0.880028
Usp3	0.0449074	0.592844	838;1832;2032;3127;3193;5366	0.980931	0.508173	0.291598	0.876381	0.874387	849;3022;3088;4183;4383;5377	0.607296	0.412585	0.615105	1	0.991667
Usp36	0.00919805	0.628406	1560;1996;3621;3905;3909;4186	1.02943	0.521975	0.263442	0.845465	0.841758	2029;2306;2310;2594;4219;4655	0.810839	0.538626	0.414725	0.986759	0.976091
Usp44	0.130729	0.926493	415;1048;1475;2209;2878;3878	1.22858	0.793992	0.172012	0.776163	0.773485	2337;3337;4006;4740;5167;5800	0.701664	0.444471	0.517564	1	0.991667
Usp46	0.0529749	0.668327	743;907;1057;4166;4700;4850	1.24978	0.572843	0.164601	0.7788	0.773485	1365;1515;2049;5158;5308;5472	0.686883	0.434032	0.532536	1	0.991667
Usp49	-0.108477	0.854146	2562;2709;3549;4441;5157;5943	0.760843	0.405915	0.459814	0.926341	0.924067	272;1058;1774;2666;3506;3653	1.38433	0.732053	0.123614	0.799625	0.798736
Usp7	-0.357127	1.95421	788;5053;5375;5545;6004;6211	1.91771	0.793461	0.0391679	0.635902	0.6104	4;211;670;840;1162;5427	2.95258	1.674	0.00383213	0.186647	0.181829
Uty	0.176484	1.31165	193;1503;1553;1696;1843;2590	2.28043	1.12386	0.017372	0.504702	0.504702	3625;4372;4519;4662;4712;6022	1.35711	0.636359	0.131017	0.809567	0.802938
Vdr	-0.0382966	0.628619	1780;1916;2081;3692;3842;6038	0.684175	0.415741	0.535437	0.957542	0.956045	177;2373;2523;4134;4299;4435	0.878866	0.538891	0.360429	0.939953	0.939953
Virma	0.13696	1.12285	82;407;1030;1170;3198;5901	1.90584	0.962122	0.0400386	0.625509	0.6104	314;3017;5045;5185;5808;6133	1.14717	0.52457	0.20472	0.899247	0.893705
Vps72	0.144022	1.03042	234;1496;1531;2422;2440;3284	1.66181	0.883019	0.0677802	0.64508	0.643587	2931;3775;3793;4684;4719;5981	0.933706	0.49364	0.321593	0.957838	0.937427
Vrk1	0.0114026	0.497775	1101;1909;2433;2822;4606;5425	0.720997	0.426498	0.498436	0.944405	0.942653	790;1609;3393;3782;4306;5114	0.531128	0.426758	0.692452	1	0.991667
Wac	0.0580632	0.616816	698;1687;2354;3155;3715;4521	0.82882	0.528728	0.399628	0.91787	0.917846	1694;2500;3060;3861;4528;5517	0.508889	0.395942	0.710661	1	0.991667
Wdhd1	-0.0514913	0.77554	50;809;1773;4746;5978;6119	1.33379	0.607626	0.137809	0.73855	0.736395	96;237;1469;4442;5406;6165	1.72871	0.664671	0.058843	0.601506	0.601506
Wdr11	0.00848532	0.494164	250;1384;3297;3711;4558;5744	0.706448	0.423699	0.512932	0.946952	0.945047	471;1657;2504;2918;4831;5965	0.687821	0.399252	0.531827	1	0.991667
Wdr4	0.0488652	0.651965	175;425;1975;3881;4648;5829	1.27694	0.558859	0.155389	0.763573	0.761871	386;1567;2334;4240;5790;6040	0.5884	0.397271	0.635024	1	0.991667
Wdr48	0.137394	0.931483	279;380;1653;2332;3656;4175	1.3607	0.798259	0.12985	0.726459	0.726459	2040;2559;3883;4562;5835;5936	0.589069	0.411313	0.634292	1	0.991667
Wdr5	-0.124574	0.996375	26;1662;4583;5450;5671;6171	1.60935	0.618177	0.0761715	0.653575	0.650378	44;544;765;1632;4553;6189	1.59926	0.853848	0.0776208	0.672984	0.668357
Wdr61	-0.155344	0.904443	1262;3145;3882;4111;4974;6188	0.640907	0.362226	0.579967	0.980027	0.976372	27;1241;2104;2333;3070;4953	1.59331	0.775211	0.0789662	0.670605	0.668357
Wdr77	0.139564	0.973724	3;708;1884;3300;3476;5672	2.53915	0.834646	0.00989251	0.390048	0.390048	543;2739;2915;4331;5507;6212	0.545133	0.350178	0.679171	1	0.991667
Wdr82	-0.525535	3.56296	4348;5753;6011;6080;6168;6195	3.40954	1.7385	0.001157	0.147385	0.1337	20;47;135;204;462;1867	4.89905	3.04826	3.86473e-05	0.0128	0.0106667
Wdr92	-0.00977691	0.578633	48;1906;3108;4426;5523;5748	1.35082	0.496137	0.132967	0.731542	0.731542	467;692;1789;3107;4309;6167	0.935538	0.484984	0.32035	0.961051	0.937427
Wsb2	-0.19307	1.30119	2925;3441;5003;5287;5458;6023	1.11207	0.576936	0.220857	0.821888	0.81742	192;757;928;1212;2774;3290	1.85184	1.11489	0.0451123	0.565955	0.561896
Wtap	0.0577197	0.603242	156;1097;2291;3093;4011;5711	0.877305	0.517145	0.361597	0.905906	0.904837	504;2204;3122;3924;5118;6059	0.50518	0.348417	0.714326	1	0.991667
Yaf2	0.194808	1.45283	406;588;1163;1750;1927;2184	2.72471	1.24473	0.00613043	0.307636	0.301765	4031;4288;4465;5052;5627;5809	1.68139	0.703043	0.0649952	0.629427	0.626256
Yeats2	0.0282625	0.555521	343;1697;1744;2809;4083;5941	0.783635	0.476227	0.438665	0.918369	0.918154	274;2132;3406;4471;4518;5872	0.675393	0.400156	0.544598	1	0.991667
Yeats4	-0.25402	1.86893	4187;4533;5295;5628;5763;5942	1.8259	0.897266	0.0476316	0.626016	0.6104	273;452;587;920;1682;2028	2.91782	1.60093	0.0041244	0.189722	0.189722
Ythdc1	0.140187	0.992278	337;1102;1372;1753;2401;4438	1.49885	0.850319	0.0964541	0.691463	0.684814	1777;3814;4462;4843;5113;5878	0.90053	0.469834	0.344534	0.943055	0.937427
Ythdc2	-0.00784884	0.647934	2085;2459;2730;2825;3335;5656	0.907355	0.497835	0.339804	0.891784	0.890742	559;2880;3390;3485;3756;4130	1.06453	0.555387	0.244366	0.936736	0.934862
Ythdf1	0.0933805	0.839074	688;1723;2426;2763;3076;3185	1.74157	0.719101	0.0573853	0.617078	0.617078	3030;3139;3452;3789;4492;5527	0.985768	0.490858	0.288649	0.95792	0.937427
Ythdf2	0.0942309	0.736775	405;1555;1575;2548;3727;4382	0.910193	0.631493	0.337831	0.890841	0.890742	1833;2488;3667;4640;4660;5810	0.548178	0.387802	0.676151	1	0.991667
Ythdf3	-0.0238552	0.576557	1259;1999;2288;4308;5205;5273	0.598979	0.399983	0.623864	0.98863	0.979331	942;1010;1907;3927;4216;4956	0.715621	0.494242	0.503662	1	0.991667
Ywhab	-0.141984	0.96762	943;2324;4117;5470;5798;5976	0.889041	0.439717	0.352915	0.901895	0.901895	239;417;745;2098;3891;5272	1.629	0.829158	0.0728152	0.655337	0.655337
Ywhae	-0.0267165	0.636216	1071;2420;4087;4148;4544;4989	0.641681	0.437834	0.579161	0.979663	0.976372	1226;1671;2067;2128;3795;5144	1.04965	0.545314	0.252339	0.943282	0.937427
Ywhaz	0.0733012	0.667926	658;1478;2154;2880;3272;4659	0.939367	0.572505	0.317957	0.893949	0.884237	1556;2943;3335;4061;4737;5557	0.587834	0.394138	0.635574	1	0.991667
Yy1	-0.0592681	0.743011	1915;3295;3637;3684;4872;5438	0.687489	0.434311	0.532079	0.955664	0.955664	777;1343;2531;2578;2920;4300	1.13744	0.636814	0.209141	0.904277	0.899207
Zbtb16	0.0956944	0.772083	682;845;1357;2854;3060;4897	1.05461	0.661711	0.249501	0.844937	0.841758	1318;3155;3361;4858;5370;5533	0.64382	0.407539	0.576889	1	0.991667
Zbtb33	0.0506655	0.630912	914;2212;2415;2593;3516;4756	0.82079	0.540783	0.406409	0.920676	0.917846	1459;2699;3622;3800;4003;5301	0.62556	0.435845	0.595907	1	0.991667
Zbtb7c	0.0649137	0.651471	963;974;1876;2911;3337;5213	0.906355	0.558396	0.340483	0.890742	0.890742	1002;2878;3304;4339;5241;5252	0.57305	0.400483	0.650932	1	0.991667
Zcchc4	-0.011068	0.535784	214;2804;2891;3598;5129;5644	0.760906	0.428819	0.459766	0.928502	0.924067	571;1086;2617;3324;3411;6001	0.870045	0.459309	0.367249	0.950256	0.946264
Zcwpw1	0.202334	1.6389	615;675;967;1495;1647;1749	3.30349	1.404	0.00153019	0.140778	0.1337	4466;4568;4720;5248;5540;5600	2.11945	0.83913	0.0248949	0.433958	0.433958
Zfp217	-0.055617	0.63906	1466;1534;3403;4603;4791;5819	0.531502	0.371083	0.692091	0.989725	0.979331	396;1424;1612;2812;4681;4749	0.848263	0.547802	0.383973	0.960514	0.958699
Zfp516	0.030698	0.677526	585;646;1432;2101;4266;6072	1.06611	0.580702	0.243609	0.84045	0.836148	143;1949;4114;4783;5569;5630	0.910439	0.471412	0.337663	0.946142	0.937427
Zfp532	0.0631395	0.658635	681;1415;2756;3160;3939;3960	1.17406	0.564557	0.193454	0.796915	0.79564	2255;2276;3055;3459;4800;5534	0.641002	0.415816	0.579877	1	0.991667
Zfp541	-0.121171	0.828908	203;2946;3427;4958;5414;6160	0.779847	0.418072	0.442046	0.92195	0.918928	55;801;1257;2788;3269;6012	1.29416	0.710462	0.149847	0.838331	0.825283
Zfp57	-0.135817	1.01486	376;431;982;1217;4726;6214	1.84556	0.778794	0.045535	0.633664	0.6104	1;1489;4998;5233;5784;5839	3.01557	0.869968	0.00336594	0.1858	0.181829
Zfp592	0.101298	0.841905	854;1402;1609;1618;3278;4442	1.42346	0.721495	0.113554	0.731696	0.722015	1773;2937;4597;4606;4813;5361	0.845644	0.464944	0.385949	0.959658	0.958699
Zfp687	-0.0929219	0.848601	206;3634;3980;4605;5736;5884	0.816888	0.481949	0.409622	0.921649	0.917846	331;479;1610;2235;2581;6009	1.36287	0.727238	0.129262	0.801715	0.801715
Zfp711	-0.0552055	0.649856	1079;2057;2520;4957;5320;5636	0.60459	0.384511	0.617938	0.990616	0.979331	579;895;1258;3695;4158;5136	1.07476	0.557027	0.239308	0.936865	0.934628
Zgpat	-0.101193	0.888671	1411;2626;4531;5182;5380;5432	0.812363	0.459963	0.413383	0.923835	0.917846	783;835;1033;1684;3589;4804	1.36657	0.761541	0.128386	0.805333	0.801068
Zhx1	0.0183799	0.56206	1231;1557;3454;3639;4129;4541	0.817318	0.481817	0.409301	0.92218	0.917846	1674;2086;2576;2761;4658;4984	0.743477	0.466667	0.476554	1	0.991667
Zmym2	0.118776	0.919531	604;654;1279;1455;4206;4415	1.57765	0.787985	0.0816715	0.659746	0.653416	1800;2009;4760;4936;5561;5611	0.938683	0.461342	0.318396	0.962161	0.937427
Zmym3	0.0543941	0.621072	637;1098;1408;4030;4311;4877	0.968038	0.532379	0.299777	0.881758	0.874557	1338;1904;2185;4807;5117;5578	0.625251	0.395092	0.596213	1	0.991667
Zmynd11	0.00502486	0.633308	1720;2855;2972;3247;3449;4938	0.851915	0.514784	0.38105	0.917177	0.909421	1277;2766;2968;3243;3360;4495	0.894926	0.54283	0.348576	0.940134	0.937427
Zmynd8	0.0842193	0.697303	571;1135;2125;2279;3984;4524	0.963269	0.597675	0.302719	0.876402	0.874557	1691;2231;3936;4090;5080;5644	0.601371	0.385179	0.621446	1	0.991667
Znhit1	0.00437876	0.483073	299;1890;2237;3879;5104;5616	0.646631	0.414197	0.574027	0.972966	0.972966	599;1111;2336;3978;4325;5916	0.661406	0.406824	0.558739	1	0.991667
Zranb3	0.156164	1.01897	139;426;1568;2308;3392;3895	1.2752	0.873229	0.155984	0.761976	0.761871	2320;2823;3907;4647;5789;6076	0.664609	0.420719	0.555513	1	0.991667
Zzz3	0.100743	0.759968	180;745;1412;3667;3942;4713	0.965427	0.651394	0.301517	0.880621	0.874557	1502;2273;2548;4803;5470;6035	0.559032	0.361668	0.665361	1	0.991667

## Sheet: S2c. LLC NSG vs invitro_D15
	Fold-change		STARS - enriched						STARS depleted
Gene Symbol	Average LFC	Average -log(p-values)	Ranks of perturbations enriched	STARS Score enriched	Average Score enriched	p-value enriched	FDR enriched	q-value enriched	Ranks of perturbations depleted	STARS Score depleted	Average Score depleted	p-value depleted	FDR depleted	q-value depleted
1500002F19Rik	-0.393736	0.838843	3434;5870	0.305867	0.118445	0.795638	1	0.990325	345;2781	0.979329	0.559223	0.292449	0.768724	0.768095		Tumor Model:	LLC
A1cf	-0.0759987	0.522651	1283;2018;2703;3407;4617;5176	0.558163	0.415841	0.666208	1	0.990325	1039;1598;2808;3512;4197;4932	0.602089	0.448059	0.62074	0.940481	0.938757		Screening conditions compared in this tab:	Untreated NSG mice taken down on D12 compared to in vitro output from Day 15
A730035I17Rik	-0.126329	0.589026	1265;2571;2831;4180;4305;5616	0.531405	0.388395	0.692135	1	0.990325	599;1910;2035;3384;3644;4950	0.764251	0.504923	0.456696	0.880428	0.87948
Abraxas1	-0.0472525	0.541438	1065;1770;3002;4074;4137;4598	0.784814	0.464156	0.437627	0.970161	0.968941	1617;2078;2141;3213;4445;5150	0.637604	0.452494	0.583405	0.927177	0.923975
Abraxas2	-0.0728262	0.557431	1271;1566;3136;3193;3434;5870	0.85903	0.436171	0.375539	0.928197	0.925652	345;2781;3022;3079;4649;4944	0.638022	0.477878	0.583033	0.928367	0.923975
Actl6a	1.60329	4.37171	16;21;22;221;424;1006	6.05644	3.73196	2.41546e-06	0.000166667	0.000153846	5209;5791;5994;6193;6194;6199	3.77209	2.20087	0.000525362	0.0164151	0.0164151
Actl6b	0.130539	0.735725	376;1669;2132;2668;3037;4499	1.06784	0.630594	0.242653	0.845966	0.833992	1716;3178;3547;4083;4546;5839	0.650621	0.397373	0.569934	0.92259	0.92259
Actr3b	-0.272218	1.04212	2036;3982;4747;4765;5126;5334	0.989157	0.547496	0.286582	0.866022	0.865165	881;1089;1450;1468;2233;4179	1.63764	0.892962	0.071651	0.417796	0.417796
Actr5	0.980121	2.57266	73;96;127;462;666;5247	4.12057	2.20179	0.00021256	0.00541538	0.00541538	968;5549;5753;6088;6119;6142	2.80442	1.2481	0.00516184	0.0872245	0.0872245
Actr6	1.20261	3.04867	26;50;124;292;1359;1970	4.17767	2.60887	0.000188406	0.004875	0.004875	4245;4856;5923;6091;6165;6189	2.74989	1.41873	0.0058744	0.09728	0.09728
Actr8	0.601861	1.85396	202;264;580;632;1303;3965	2.88769	1.58794	0.00441908	0.0653393	0.0652105	2250;4912;5583;5635;5951;6013	1.81851	0.861566	0.04825	0.344405	0.344405
Adar	-0.348868	1.34263	3390;4534;4728;4951;5224;5634	1.36994	0.677272	0.127345	0.642939	0.642939	581;991;1264;1487;1681;2825	2.19785	1.15033	0.0209106	0.213753	0.212854
Adnp	1.05449	3.49141	148;150;154;385;526;613	6.03546	2.98803	2.41546e-06	0.000153846	0.000153846	5602;5689;5830;6061;6065;6067	4.29998	1.84919	0.000136473	0.00538095	0.00525581
Aebp2	0.184712	0.82125	308;1522;1721;2499;3242;3991	1.15374	0.703862	0.202112	0.802633	0.795038	2224;2973;3716;4494;4693;5907	0.630077	0.408367	0.591064	0.92427	0.923994
Aicda	-0.0685235	0.630793	268;2431;3928;4161;5359;5785	0.682817	0.408165	0.536856	1	0.990325	430;856;2054;2287;3784;5947	0.95895	0.540695	0.3055	0.77832	0.777398
Aire	-0.170819	0.7129	2335;2705;3304;3601;3997;5742	0.67019	0.439616	0.549682	1	0.990325	473;2218;2614;2911;3510;3880	1.22724	0.61104	0.172483	0.63333	0.63333
Alkbh1	-0.267871	0.99073	2997;3305;4271;4730;4841;5506	0.968134	0.519701	0.299715	0.870751	0.870751	709;1374;1485;1944;2910;3218	1.71471	0.848988	0.0607343	0.386831	0.38636
Anp32a	-0.0873268	0.572219	907;2860;3198;3817;4392;5015	0.569152	0.434339	0.654936	1	0.990325	1200;1823;2398;3017;3355;5308	0.897399	0.4905	0.346768	0.799788	0.797414
Anp32b	-0.37365	1.34796	2659;4518;4712;4930;5806;5820	1.35654	0.626802	0.131135	0.65018	0.65018	395;409;1285;1503;1697;3556	2.17882	1.1549	0.0217524	0.215701	0.215701
Anp32e	0.000513161	0.521076	293;2168;2704;2772;4112;6047	0.739342	0.437702	0.480679	0.993763	0.990325	168;2103;3443;3511;4047;5922	0.849426	0.446751	0.383144	0.827231	0.827088
Apbb1	-0.169646	0.668551	1447;2983;3180;3988;4173;5883	0.597482	0.390346	0.625428	1	0.990325	332;2042;2227;3035;3232;4768	0.960212	0.573057	0.304663	0.778583	0.777398
Apex1	-0.0115034	0.63799	1475;1613;2120;2716;2726;5735	1.26187	0.546819	0.16053	0.716544	0.716544	480;3489;3499;4095;4602;4740	0.757268	0.491466	0.463291	0.882865	0.882279
Apobec1	0.00177451	0.619742	1409;1629;2043;2204;4328;4972	1.005	0.531207	0.277361	0.855326	0.851438	1243;1887;4011;4172;4586;4806	0.669525	0.447007	0.550306	0.913132	0.911756
Apobec2	-0.146442	0.618401	1343;2318;3566;4158;4709;5494	0.5339	0.383512	0.68989	1	0.990325	721;1506;2057;2649;3897;4872	0.787689	0.53008	0.434879	0.869758	0.869758
Apobec3	0.0300342	0.551766	481;1641;1794;3386;3525;5868	0.81669	0.473001	0.409812	0.95182	0.951472	347;2690;2829;4421;4574;5734	0.599666	0.403129	0.623248	0.939125	0.938757
Arid1a	-0.150461	0.668691	1960;2557;3129;4340;4516;5090	0.545833	0.436307	0.678469	1	0.990325	1125;1699;1875;3086;3658;4255	0.98683	0.57315	0.288033	0.765621	0.764591
Arid1b	-0.121682	0.665667	2419;2466;2912;3310;3830;5320	0.702381	0.484284	0.516705	1	0.990325	895;2385;2905;3303;3749;3796	1.28427	0.570566	0.152971	0.613366	0.611986
Arid2	1.29124	4.27232	82;168;174;183;230;327	7.67294	3.65361	0	0	0	5888;5985;6032;6041;6047;6133	5.64602	2.34911	7.24638e-06	0.00048	0.00048
Arid3a	-0.241408	0.954251	2138;3532;4453;4898;4931;4971	0.775961	0.532487	0.445435	0.978302	0.977523	1244;1284;1317;1762;2683;4077	1.303	0.817715	0.146847	0.597489	0.597489
Arid3b	-0.252455	0.910927	2398;3578;4166;4384;4836;5621	0.793074	0.475257	0.430144	0.96651	0.965932	594;1379;1831;2049;2637;3817	1.32301	0.780641	0.140836	0.587466	0.586573
Arid3c	0.0259672	0.608358	781;1922;2388;2422;4123;4754	0.889703	0.521473	0.352353	0.918891	0.915476	1461;2092;3793;3827;4293;5434	0.570265	0.409526	0.653803	0.947242	0.947242
Arid4a	0.495327	1.40624	58;811;1269;1451;1607;3645	2.28858	1.20491	0.0170556	0.176525	0.17637	2570;4608;4764;4946;5404;6157	1.43413	0.596352	0.110992	0.520686	0.518045
Arid4b	-0.0361092	0.520237	919;1825;2995;3272;4679;4767	0.690757	0.445997	0.5287	1	0.990325	1448;1536;2943;3220;4390;5296	0.600209	0.427988	0.622696	0.940004	0.938757
Arid5a	0.0288226	0.670492	1310;1615;1833;2731;3836;4387	0.907222	0.574688	0.339946	0.910922	0.910103	1828;2379;3484;4382;4600;4905	0.616393	0.442699	0.605624	0.936428	0.935508
Arid5b	0.404559	1.57302	281;935;1125;1227;1748;2061	2.87576	1.34763	0.00448913	0.0652105	0.0652105	4154;4467;4988;5090;5280;5934	1.79427	0.769084	0.0508841	0.3511	0.350664
Arntl	-0.42764	1.51564	3158;3888;4940;5609;5814;5976	1.06251	0.677448	0.245484	0.848689	0.833992	239;401;606;1275;2327;3057	1.86536	1.29848	0.0440145	0.331309	0.330995
Arrb1	0.0988203	0.743424	908;1152;1647;2487;2951;4920	1.11861	0.637155	0.217837	0.814307	0.814307	1295;3264;3728;4568;5063;5307	0.677348	0.424072	0.542383	0.910939	0.910939
Asf1a	-0.528758	2.08867	2891;5219;5492;5835;5952;6061	2.15767	0.97908	0.0231159	0.215056	0.215056	154;263;380;723;996;3324	3.27328	1.78883	0.0016099	0.0386377	0.0386377
Asf1b	-0.663479	2.87568	5201;5286;5746;5833;6049;6158	3.23794	1.41635	0.00174758	0.0307872	0.0307872	57;166;382;469;929;1014	4.724	2.46231	5.55556e-05	0.00296774	0.00296774
Ash1l	-0.23938	0.910978	2076;3307;4313;4945;4949;5189	0.717913	0.495424	0.501314	1	0.990325	1026;1266;1270;1902;2908;4139	1.19794	0.78066	0.183699	0.647247	0.647247
Ash2l	0.639493	1.6363	91;240;436;918;2774;3869	2.28487	1.40168	0.0172536	0.17637	0.17637	2346;3441;5297;5779;5975;6124	1.4	0.690434	0.119411	0.535892	0.535892
Asxl1	-0.240224	0.791314	1769;2405;3834;4202;5523;5924	0.57851	0.373068	0.645313	1	0.990325	291;692;2013;2381;3810;4446	0.935538	0.678224	0.32035	0.787092	0.786898
Asxl2	-0.0208625	0.500164	524;1746;3098;3419;3593;5827	0.786323	0.428799	0.436304	0.969826	0.968941	388;2622;2796;3117;4469;5691	0.627307	0.42226	0.594022	0.9254	0.9254
Asxl3	-0.226087	0.78835	2361;2909;3486;3691;5122;5852	0.679985	0.407059	0.539711	1	0.990325	363;1093;2524;2729;3306;3854	1.24476	0.675684	0.166066	0.619383	0.618726
Atad2	-0.048859	0.714305	2145;2323;2597;3179;3721;3763	1.30702	0.612211	0.145671	0.685318	0.684242	2452;2494;3036;3618;3892;4070	1.10266	0.574161	0.225179	0.710278	0.70015
Atad2b	-0.0670129	0.574958	1305;1899;3286;4064;4107;4401	0.898919	0.483042	0.345813	0.916266	0.910322	1814;2108;2151;2929;4316;4910	0.684188	0.492847	0.535391	0.910275	0.907648
Atf2	-0.107081	0.572782	1285;2461;3246;3662;4479;5171	0.515502	0.41467	0.705504	1	0.990325	1044;1736;2553;2969;3754;4930	0.71867	0.490993	0.500779	0.899447	0.898028
Atf7ip	0.23259	1.28798	841;1398;1408;1610;1873;2497	2.37572	1.10353	0.0140785	0.153382	0.153382	3718;4342;4605;4807;4817;5374	1.42554	0.693772	0.113128	0.518947	0.518947
Atf7ip2	-0.0832005	0.628163	1775;2594;3102;3343;3352;4943	0.898887	0.512809	0.34586	0.914927	0.910322	1272;2863;2872;3113;3621;4440	0.87593	0.538425	0.362565	0.810267	0.810267
Atm	0.2639	1.10301	544;713;1033;1968;2223;3998	1.6463	0.945136	0.0701087	0.455294	0.455294	2217;3992;4247;5182;5502;5671	0.994779	0.525715	0.283312	0.759165	0.758577
Atn1	0.0385375	0.558795	567;1391;1787;2556;4896;5507	0.827405	0.47903	0.400868	0.946987	0.946987	708;1319;3659;4428;4824;5648	0.584636	0.389409	0.638947	0.942205	0.942205
Atr	0.211457	1.18707	932;1005;1544;1974;2331;2455	2.41992	1.01713	0.0124674	0.13764	0.13764	3760;3884;4241;4671;5210;5283	1.45752	0.633421	0.105483	0.507791	0.506763
Atrx	0.475226	1.83919	448;556;598;793;1315;2550	2.69734	1.5754	0.00694928	0.0913333	0.0913333	3665;4900;5422;5617;5659;5767	1.72936	0.911263	0.0586594	0.377977	0.377977
Atxn7	-0.0465235	0.495957	808;1738;2987;3195;5018;5193	0.606527	0.413399	0.615938	1	0.990325	1022;1197;3020;3228;4477;5407	0.626172	0.425193	0.595293	0.926509	0.926509
Atxn7l3	0.480078	1.82401	317;550;768;1253;1603;1604	3.529	1.5625	0.000865942	0.0170714	0.0170714	4611;4612;4962;5447;5665;5898	2.29361	0.899022	0.0168768	0.188838	0.188779
Aurka	-0.22981	0.92027	1057;1433;3114;5665;5760;6006	1.09219	0.451222	0.230414	0.836768	0.833992	209;455;550;3101;4782;5158	1.97874	0.788575	0.0340906	0.28227	0.28227
Aurkb	-0.400089	1.26743	521;1299;4476;4950;6075;6211	0.92133	0.484363	0.329977	0.901719	0.901719	4;140;1265;1739;4916;5694	2.41456	1.08596	0.0130386	0.16738	0.16738
Aurkc	-0.294771	0.975868	2343;3226;3929;4484;5744;5838	0.673188	0.445157	0.546571	1	0.990325	377;471;1731;2286;2989;3872	1.23262	0.836278	0.17045	0.630058	0.630058
Babam1	-0.258754	0.914641	1423;2651;4139;5301;5586;5767	0.765763	0.431879	0.455257	0.981648	0.979468	448;629;914;2076;3564;4792	1.40353	0.783802	0.118686	0.538477	0.535614
Babam2	-0.189255	0.709323	1503;2534;2820;3545;5666;5871	0.532974	0.375263	0.690728	1	0.990325	344;549;2670;3395;3681;4712	1.09219	0.607985	0.230414	0.701408	0.70015
Bahd1	0.184105	1.0872	943;1361;1432;1594;2622;3091	1.81963	0.93159	0.0481981	0.359532	0.359532	3124;3593;4621;4783;4854;5272	1.03757	0.585105	0.258893	0.73412	0.730978
Banp	-0.0405469	0.526761	354;2676;3028;3682;4856;5640	0.593585	0.402417	0.629495	1	0.990325	575;1359;2533;3187;3539;5861	0.81035	0.45158	0.415075	0.853868	0.851326
Bap1	0.493959	1.60023	245;289;1168;1221;1259;3447	2.7869	1.37086	0.0054215	0.0760847	0.0760847	2768;4956;4994;5047;5926;5970	1.79515	0.736339	0.0508237	0.352151	0.350664
Bard1	0.291408	1.029	382;445;1188;2131;2598;4521	1.35065	0.881762	0.133023	0.655613	0.652562	1694;3617;4084;5027;5770;5833	0.809551	0.464502	0.415786	0.85427	0.851326
Baz1a	0.336167	1.52855	536;961;1050;1584;1700;1919	3.06178	1.30952	0.00263768	0.0432475	0.0432475	4296;4515;4631;5165;5254;5679	1.93477	0.782114	0.037913	0.298971	0.298971
Baz1b	-0.928901	4.34195	4815;6022;6122;6142;6156;6198	4.89145	2.23773	3.86473e-05	0.00142222	0.00142222	17;59;73;93;193;1400	6.77462	3.71077	0	0	0
Baz2a	-0.278472	1.05753	1204;4164;4462;5293;5324;5709	1.0981	0.523363	0.227412	0.833173	0.830696	506;891;922;1753;2051;5011	1.80284	0.906153	0.0500556	0.349755	0.349755
Baz2b	-0.18721	0.740851	2430;2761;3191;4292;4702;5352	0.706714	0.439752	0.512531	1	0.990325	863;1513;1923;3024;3454;3785	1.29183	0.63497	0.150514	0.607932	0.607932
Bcor	0.454848	1.73233	241;815;1067;1252;1298;1913	3.06994	1.48402	0.00260386	0.04312	0.04312	4302;4917;4963;5148;5400;5974	1.94097	0.852046	0.0370495	0.294971	0.294971
Bcorl1	-0.0545579	0.7445	2042;2806;2869;3059;3273;3857	1.24273	0.638069	0.16704	0.729863	0.727761	2358;2942;3156;3346;3409;4173	1.03754	0.607334	0.258931	0.732974	0.730978
Bmi1	0.276569	1.15229	493;951;984;1481;2867;3337	1.62009	0.987348	0.0743442	0.475344	0.475344	2878;3348;4734;5231;5264;5722	0.922728	0.553207	0.328938	0.798713	0.795831
Bptf	-0.26213	0.912242	1263;3075;4012;5041;5716;5822	0.635473	0.421972	0.585558	1	0.990325	393;499;1174;2203;3140;4952	1.15987	0.781758	0.199676	0.674824	0.674824
Brca1	0.21062	1.29931	1256;1280;1317;1443;2221;2362	2.52055	1.11322	0.0102717	0.1215	0.1215	3853;3994;4772;4898;4935;4959	1.5308	0.722155	0.0902428	0.467006	0.465564
Brca2	-0.162987	0.74449	2097;3267;3661;3681;3861;5322	0.678317	0.486696	0.541343	1	0.990325	893;2354;2534;2554;2948;4118	1.12042	0.63807	0.217112	0.706361	0.70015
Brcc3	-0.144216	0.669888	2177;2652;3053;3781;3896;5479	0.663868	0.448999	0.556168	1	0.990325	736;2319;2434;3162;3563;4038	1.12323	0.574184	0.215715	0.704584	0.70015
Brd1	1.02155	3.58275	162;196;252;365;405;456	6.80644	3.06595	0	0	0	5759;5810;5850;5963;6019;6053	4.93167	1.9403	3.26087e-05	0.00186207	0.00186207
Brd2	1.36266	4.07907	75;77;83;147;343;792	5.53689	3.48842	8.45411e-06	0.000466667	0.000451613	5423;5872;6068;6132;6138;6140	3.91046	2.15469	0.000317633	0.0107347	0.0107347
Brd3	0.14405	0.908671	814;1431;1600;1966;2187;4569	1.67785	0.778675	0.0658092	0.448477	0.444032	1646;4028;4249;4615;4784;5401	1.01536	0.498506	0.271345	0.741498	0.74098
Brd4	0.754665	2.42575	210;261;311;370;1311;1987	3.77791	2.07712	0.00051087	0.01128	0.0112632	4228;4904;5845;5904;5954;6005	2.45776	1.19383	0.0115543	0.154306	0.154306
Brd7	1.02964	3.28471	109;163;195;367;539;905	5.02034	2.81161	2.53623e-05	0.001	0.001	5310;5676;5848;6020;6052;6106	3.47614	1.69938	0.00102536	0.0283	0.0282258
Brd8	-0.241168	0.901239	2538;3608;3886;4403;4941;5368	0.805706	0.489855	0.41917	0.958765	0.957657	847;1274;1812;2329;2607;3677	1.36727	0.772338	0.128164	0.562971	0.561747
Brd9	0.758434	2.65002	219;333;392;452;594;1635	4.36341	2.26903	0.000124396	0.00355172	0.00355172	4580;5621;5763;5823;5882;5996	2.99229	1.35822	0.00358937	0.0691163	0.0691163
Brdt	-0.124874	0.605235	1822;2198;2893;3671;4902;5162	0.514306	0.416338	0.706442	1	0.990325	1053;1313;2544;3322;4017;4393	0.90366	0.518805	0.342482	0.799929	0.797414
Brms1	0.0424552	0.682581	1273;1406;1599;3216;3539;4467	0.860132	0.585044	0.374761	0.927659	0.925652	1748;2676;2999;4616;4809;4942	0.596811	0.438808	0.626184	0.939275	0.938757
Brms1l	-0.176883	0.72342	1907;3291;3313;4095;4252;5514	0.686165	0.438372	0.533287	1	0.990325	701;1963;2120;2902;2924;4308	1.13499	0.620033	0.210399	0.695449	0.694581
Brpf1	0.0495264	0.603401	674;1354;2184;2263;4562;5042	0.971984	0.517233	0.296976	0.86889	0.867933	1173;1653;3952;4031;4861;5541	0.605269	0.388149	0.617266	0.937791	0.937791
Brpf3	-0.0231294	0.572032	956;1790;2851;3938;4011;4375	0.914359	0.490365	0.334772	0.908823	0.907634	1840;2204;2277;3364;4425;5259	0.601612	0.443049	0.621171	0.939416	0.938757
Brwd1	-0.103281	0.668909	2408;2433;3008;3170;3654;4998	0.759994	0.520918	0.460685	0.986926	0.979468	1217;2561;3045;3207;3782;3807	1.27673	0.573334	0.155477	0.615957	0.614888
Brwd3	-0.206855	0.756792	2193;2338;2590;4870;5087;5805	0.619367	0.400928	0.602412	1	0.990325	410;1128;1345;3625;3877;4022	1.13358	0.648648	0.210975	0.694581	0.694581
Bub1	0.0391351	0.568336	408;2229;2623;2647;3961;5317	0.788514	0.487203	0.434279	0.969226	0.968355	898;2254;3568;3592;3986;5807	0.631475	0.393713	0.589665	0.925579	0.923975
Carm1	0.20938	1.21208	804;1181;1846;1944;2225;2227	2.67391	1.03854	0.00732367	0.09475	0.09475	3988;3990;4271;4369;5034;5411	1.6437	0.655906	0.0704964	0.416936	0.416936
Cbx1	-0.327737	1.09037	2373;3051;3921;5405;5713;5914	0.837056	0.48016	0.392899	0.940231	0.938993	301;502;810;2294;3164;3842	1.5356	0.93433	0.0891365	0.465647	0.464258
Cbx2	-0.185191	0.707516	1893;2432;2804;4686;5190;5550	0.53268	0.395574	0.690964	1	0.990325	665;1025;1529;3411;3783;4322	0.946119	0.606425	0.313649	0.782232	0.779778
Cbx3	0.464683	1.94307	525;595;798;848;1196;1771	3.27092	1.66434	0.00161353	0.0287312	0.0287312	4444;5019;5367;5417;5620;5690	2.09444	0.998509	0.0265374	0.242796	0.242796
Cbx3-ps6	0.682037	1.07321	525	1.07321	0.536606	0.240008	0.842064	0.833992	5690	0.038259	0.0191295	0.965937	0.980142	0.980142
Cbx3-ps7	0.682037	1.07321	525	1.07321	0.536606	0.240008	0.842064	0.833992	5690	0.038259	0.0191295	0.965937	0.980142	0.980142
Cbx3-ps8	0.682037	1.07321	525	1.07321	0.536606	0.240008	0.842064	0.833992	5690	0.038259	0.0191295	0.965937	0.980142	0.980142
Cbx4	0.113261	0.822757	563;1742;2197;2790;3150;3355	1.60607	0.705134	0.0765749	0.485854	0.485854	2860;3065;3425;4018;4473;5652	0.897895	0.465068	0.346459	0.80019	0.797414
Cbx5	0.14641	0.770269	460;1333;1783;2063;3449;4548	1.08983	0.660172	0.231466	0.836917	0.833992	1667;2766;4152;4432;4882;5755	0.661559	0.3991	0.558633	0.917754	0.915366
Cbx6	-0.189622	0.787787	2382;2850;3792;4256;4850;4857	0.688007	0.481454	0.531472	1	0.990325	1358;1365;1959;2423;3365;3833	1.25899	0.675158	0.161329	0.619861	0.618726
Cbx7	0.0662874	0.766023	877;1910;2175;2937;3058;3714	1.34118	0.656524	0.135647	0.662631	0.662631	2501;3157;3278;4040;4305;5338	0.735338	0.471471	0.484627	0.895694	0.893396
Cbx8	-0.0696001	0.562757	655;1243;3762;4600;4632;5549	0.609419	0.411559	0.612967	1	0.990325	666;1583;1615;2453;4972;5560	0.874739	0.482415	0.363664	0.810536	0.810536
Cdc6	-0.0594577	0.600307	1602;2269;2848;3504;3769;4418	0.888873	0.514566	0.353027	0.917758	0.915476	1797;2446;2711;3367;3946;4613	0.776327	0.502789	0.445072	0.872237	0.871017
Cdc73	0.364281	1.41652	380;727;1091;1255;1377;3631	2.60283	1.21357	0.00836232	0.100348	0.0997122	2584;4838;4960;5124;5488;5835	1.66033	0.681048	0.0682826	0.412686	0.412291
Cdk1	0.247327	1.0572	667;728;847;1571;2755;4561	1.48635	0.905869	0.0990459	0.563643	0.563643	1654;3460;4644;5368;5487;5548	0.870822	0.516441	0.366488	0.814636	0.814636
Cdk17	-0.30925	1.06538	2274;2337;4455;5390;5698;5843	0.825927	0.48495	0.402103	0.94855	0.94855	372;517;825;1760;3878;3941	1.51531	0.912906	0.0931027	0.474394	0.473724
Cdk2	-0.170582	0.736572	2621;2787;3323;3544;4294;5450	0.786323	0.46592	0.436304	0.969826	0.968941	765;1921;2671;2892;3428;3594	1.42676	0.631304	0.112868	0.519194	0.518947
Cdk5	-0.267882	0.88191	2356;2472;3815;5003;5048;5942	0.67809	0.413668	0.541652	1	0.990325	273;1167;1212;2400;3743;3859	1.24138	0.755821	0.167385	0.620112	0.620112
Cdk7	-0.234179	0.818407	1981;2856;3266;4993;5246;5721	0.617259	0.408361	0.604653	1	0.990325	494;969;1222;2949;3359;4234	1.10316	0.701407	0.225087	0.711344	0.70015
Cdk9	-0.31865	1.27963	600;4023;5055;5576;5694;6062	1.15578	0.595505	0.201376	0.803561	0.795038	153;521;639;1160;2192;5615	1.91903	1.09633	0.039035	0.304915	0.304915
Cdyl	-0.227072	0.789611	2459;2477;3043;4120;5459;5815	0.718268	0.400607	0.501036	1	0.990325	400;756;2095;3172;3738;3756	1.31187	0.676765	0.144114	0.595142	0.594443
Cdyl2	-0.00146199	0.600715	483;2486;3373;3598;4156;4273	0.97583	0.514949	0.294586	0.869579	0.867933	1942;2059;2617;2842;3729;5732	0.728788	0.459174	0.491068	0.894618	0.893396
Cecr2	-0.171737	0.714068	2141;2215;3911;4144;4779;5157	0.601888	0.439975	0.620896	1	0.990325	1058;1436;2071;2304;4000;4074	1.1001	0.612019	0.22647	0.706279	0.70015
Cenpa	0.0645122	0.540014	206;745;3328;4031;5058;5793	0.888192	0.462988	0.353463	0.917451	0.915476	422;1157;2184;2887;5470;6009	0.698243	0.430895	0.521114	0.907428	0.907345
Cenpc1	0.0483388	0.75815	1309;1753;2050;2266;3388;4042	1.12065	0.649767	0.216775	0.815864	0.814307	2173;2827;3949;4165;4462;4906	0.615862	0.481239	0.606159	0.935508	0.935508
Chaf1a	-0.532014	1.83629	2919;4981;5345;5408;5458;6196	1.82565	0.782397	0.0476715	0.358836	0.358836	19;757;807;870;1234;3296	2.82827	1.57312	0.00496014	0.0855625	0.0852371
Chaf1b	0.0183663	0.719034	990;2493;2569;2615;3679;3754	1.31326	0.61627	0.143709	0.683856	0.683856	2461;2536;3600;3646;3722;5225	0.731646	0.495982	0.488171	0.895251	0.893396
Chd1	-0.849844	3.96668	3024;6074;6103;6140;6148;6179	5.43267	2.04406	1.08696e-05	0.000529412	0.000529412	36;67;75;112;141;3191	7.45258	3.38916	0	0	0
Chd1l	-0.565466	2.41163	4849;5379;5481;5664;5764;6106	2.62076	1.19513	0.00801812	0.0998346	0.0997122	109;451;551;734;836;1366	3.94752	2.06539	0.000300725	0.010375	0.010375
Chd2	-0.0432052	0.56687	1044;2677;2702;2950;3442;5307	0.855229	0.485916	0.378563	0.925997	0.925652	908;2773;3265;3513;3538;5171	0.810801	0.469733	0.414764	0.855355	0.851326
Chd3	-0.0865865	0.600511	1786;2523;2760;3404;4025;4795	0.675496	0.483521	0.544263	1	0.990325	1420;2190;2811;3455;3692;4429	0.882393	0.514743	0.357659	0.806926	0.806926
Chd4	-0.248643	0.910782	1212;1681;4119;5495;5545;5982	0.910808	0.429812	0.337262	0.90814	0.907634	233;670;720;2096;4534;5003	1.66753	0.780497	0.0670773	0.408382	0.408382
Chd5	-0.315241	1.02327	1889;3183;3927;5071;5809;5949	0.652119	0.4418	0.568432	1	0.990325	266;406;1144;2288;3032;4326	1.31098	0.876866	0.144303	0.594443	0.594443
Chd6	0.0228499	0.627859	1172;1186;2575;2905;3275;5007	0.93782	0.538169	0.319081	0.888064	0.888064	1208;2940;3310;3640;5029;5043	0.587127	0.423423	0.63628	0.943312	0.94183
Chd7	-0.0352106	0.534118	1047;2075;2533;2779;4658;4954	0.736729	0.457877	0.483251	0.996593	0.990325	1261;1557;3436;3682;4140;5168	0.580266	0.43249	0.643362	0.946188	0.946188
Chd8	0.251483	0.81865	203;776;1034;2811;3587;5164	1.27265	0.701627	0.15675	0.711173	0.711173	1051;2628;3404;5181;5439;6012	0.698281	0.377013	0.521054	0.90828	0.907345
Chd9	-0.209045	0.730976	1219;3093;3482;4285;5215;5891	0.626201	0.367838	0.595243	1	0.990325	324;1000;1930;2733;3122;4996	1.01967	0.626531	0.268957	0.741085	0.739431
Chek1	0.162697	0.753513	348;639;1651;2515;2923;5925	1.1356	0.645809	0.209907	0.800935	0.799508	290;3292;3700;4564;5576;5867	0.686496	0.429108	0.533066	0.91006	0.907648
Chrac1	0.170102	0.766466	403;897;1785;2147;4130;4433	1.03826	0.656928	0.258514	0.842717	0.842717	1782;2085;4068;4430;5318;5812	0.636166	0.383987	0.584856	0.926815	0.923975
Chtop	-0.046488	0.512351	1146;1220;1844;3958;4978;5525	0.74047	0.422196	0.479529	0.992625	0.990325	690;1237;2257;4371;4995;5069	0.611526	0.439263	0.610748	0.93648	0.936017
Chuk	-0.408456	1.41145	1729;2770;4522;5903;6016;6055	1.51432	0.602162	0.0933213	0.551929	0.550883	160;199;312;1693;3445;4486	2.66374	1.20898	0.00744082	0.118481	0.117581
Cir1	0.526694	1.27709	78;304;541;1358;3457;5228	1.99817	1.09416	0.0328563	0.283385	0.282902	987;2758;4857;5674;5911;6137	1.10379	0.532302	0.22481	0.711828	0.70015
Cit	0.510416	1.93179	314;570;790;823;1404;1751	3.30051	1.65473	0.00153623	0.027956	0.027956	4464;4811;5392;5425;5645;5901	2.11716	0.960519	0.0250036	0.232618	0.232618
Clns1a	-0.0567761	0.521302	494;2048;2504;3068;4738;6014	0.641197	0.3858	0.579626	1	0.990325	201;1477;3147;3711;4167;5721	0.783424	0.446948	0.43897	0.87477	0.87037
Clock	-0.12531	0.695577	723;3614;3863;4081;4713;5040	0.808267	0.469365	0.416829	0.957376	0.956921	1175;1502;2134;2352;2601;5492	1.34851	0.596148	0.133543	0.571442	0.571442
Cop1	1.008	3.47203	198;214;224;263;324;875	5.65924	2.97119	6.03865e-06	0.00037037	0.00037037	5340;5891;5952;5991;6001;6017	4.00695	1.86547	0.00026087	0.0093913	0.0093913
Coro2a	-0.290761	1.09887	3391;3773;4172;4616;5187;5411	1.19819	0.574727	0.183644	0.76219	0.759397	804;1028;1599;2043;2442;2824	2.05504	0.941598	0.0290326	0.253042	0.253042
Crb2	0.0735889	0.912359	1407;1633;2288;2689;2699;3016	1.88364	0.781849	0.0421099	0.324344	0.324344	3199;3516;3526;3927;4582;4808	1.08063	0.571349	0.236088	0.708264	0.707608
Crebbp	1.49771	4.689	53;90;112;135;178;309	7.82048	4.00815	0	0	0	5906;6037;6080;6103;6125;6162	5.76803	2.57074	3.62319e-06	0.00025	0.00025
Csnk2a1	0.733434	2.23596	166;197;430;446;760;4086	3.84129	1.9146	0.000369565	0.00861972	0.00845946	2129;5455;5769;5785;6018;6049	2.58958	1.07872	0.00855314	0.128764	0.126737
Csnk2a3	0.966036	2.45511	166;197;430;760	3.65023	1.96263	0.000684783	0.0145385	0.0145385	5455;5785;6018;6049	2.1939	0.957456	0.0210797	0.212854	0.212854
Cstf1	-0.244877	0.981045	378;2547;4276;5033;5855;6155	0.704023	0.4342	0.515209	1	0.990325	60;360;1182;1939;3668;5837	1.40172	0.840728	0.119025	0.535614	0.535614
Ctbp1	-0.115727	0.61159	1206;3010;3096;4035;4229;5136	0.604233	0.435094	0.618322	1	0.990325	1079;1986;2180;3119;3205;5009	0.974514	0.524228	0.295669	0.771068	0.771068
Ctbp2	0.00678914	0.70788	923;1911;3411;3510;3511;3519	1.48171	0.606726	0.100274	0.566737	0.566737	2696;2704;2705;2804;4304;5292	0.819877	0.509089	0.407063	0.846854	0.846854
Ctcf	-0.138368	0.600346	1137;1774;2541;4580;4655;5963	0.549121	0.359334	0.675198	1	0.990325	252;1560;1635;3674;4441;5078	0.836332	0.514654	0.393504	0.836511	0.835496
Ctcfl	-0.103925	0.571007	1110;2460;3187;4146;4322;5178	0.526731	0.413144	0.696281	1	0.990325	1037;1893;2069;3028;3755;5105	0.718268	0.48947	0.501036	0.898934	0.898028
Ctr9	-0.0849004	0.795805	438;675;3787;5428;5690;5832	0.951803	0.508659	0.310064	0.87772	0.87772	383;525;787;2428;5540;5777	1.56759	0.682013	0.0832415	0.449016	0.446796
Cul1	-0.0559933	0.60562	1135;2620;3045;3726;3959;4143	1.05634	0.519126	0.248664	0.83527	0.834421	2072;2256;2489;3170;3595;5080	0.785446	0.506919	0.437018	0.872982	0.87037
Cul2	-0.44967	1.57913	1348;2698;5340;5772;6079;6151	1.45204	0.659078	0.106688	0.581171	0.581171	64;136;443;875;3517;4867	2.36118	1.35256	0.0144589	0.172259	0.17042
Cul3	2.35631	6.77781	7;11;31;42;52;87	11.1231	5.76582	0	0	0	6128;6163;6173;6184;6204;6208	8.52227	3.77599	0	0	0
Cul4a	0.116941	0.736757	520;661;1500;1658;5351;5619	1.38863	0.631451	0.122229	0.624728	0.624728	596;864;4557;4715;5554;5695	0.825193	0.469597	0.402907	0.844575	0.844575
Cul4b	0.146285	0.820691	679;794;2234;2291;3284;4015	1.13811	0.70336	0.208925	0.80648	0.799508	2200;2931;3924;3981;5421;5536	0.621767	0.429306	0.59985	0.93185	0.93185
Cul5	1.59238	5.00968	69;79;94;101;120;273	8.14325	4.27952	0	0	0	5942;6095;6114;6121;6136;6146	6.0353	2.78952	2.41546e-06	0.000173913	0.000173913
Cxxc1	-0.383569	1.34292	2503;4526;4804;5220;5285;6039	1.36322	0.608295	0.129135	0.648024	0.645742	176;930;995;1411;1689;3712	2.18831	1.15061	0.0213708	0.214485	0.214048
Dapk3	-1.05371	5.64671	6072;6101;6129;6159;6174;6193	7.4373	3.13264	0	0	0	22;41;56;86;114;143	9.82821	4.81933	0	0	0
Daxx	0.193782	0.905855	500;831;2056;2164;2855;3853	1.24543	0.776312	0.165895	0.732592	0.727761	2362;3360;4051;4159;5384;5715	0.709642	0.447073	0.509481	0.908181	0.907345
Ddb1	-0.0306274	0.703508	386;828;1876;3107;5992;6058	0.82301	0.508962	0.404622	0.950431	0.949737	157;223;3108;4339;5387;5829	1.77753	0.602949	0.052878	0.355959	0.355959
Ddb2	-0.0498646	0.523138	1362;1683;2826;3210;4268;5025	0.602716	0.448468	0.620016	1	0.990325	1190;1947;3005;3389;4532;4853	0.644166	0.439076	0.576486	0.925955	0.923975
Ddx1	-0.299974	1.02846	2135;4126;4317;4527;4578;6013	1.07416	0.492968	0.239527	0.847556	0.833992	202;1637;1688;1898;2089;4080	1.76696	0.881328	0.0539831	0.35902	0.358016
Ddx10	-0.0460457	0.749158	476;552;3177;5487;5624;5637	1.08838	0.531932	0.232089	0.837342	0.833992	578;591;728;3038;5663;5739	1.65504	0.642049	0.0689626	0.413775	0.412302
Ddx17	0.308558	1.45083	626;1043;1114;1330;1817;2283	2.60919	1.24298	0.00825966	0.102075	0.0997122	3932;4398;4885;5101;5172;5589	1.59588	0.744534	0.0782331	0.436209	0.435738
Ddx18	-0.283839	0.998023	1405;2098;3826;5580;5825;5939	0.993421	0.451518	0.284077	0.860022	0.860022	276;390;635;2389;4117;4810	1.81121	0.855176	0.0492754	0.348718	0.348237
Ddx21	0.125324	0.832048	812;1454;1682;1894;3262;4118	1.20365	0.713068	0.181386	0.756615	0.756615	2097;2953;4321;4533;4761;5403	0.720993	0.457424	0.498492	0.898261	0.897733
Ddx23	0.0335048	0.673889	1072;1203;1878;2017;3087;5895	1.11943	0.577571	0.21754	0.816884	0.814307	320;3128;4198;4337;5012;5143	0.676599	0.474427	0.543252	0.911475	0.911228
Ddx24	0.249124	1.15094	678;822;1179;1811;2708;2925	1.96347	0.986196	0.0354614	0.298091	0.298091	3290;3507;4404;5036;5393;5537	1.13499	0.570941	0.210399	0.695449	0.694581
Ddx27	0.344346	0.94707	76;461;866;1728;5120;5948	1.46207	0.811615	0.104341	0.579826	0.577147	267;1095;4487;5349;5754;6139	0.797014	0.498888	0.42674	0.861807	0.860539
Ddx28	-0.0689625	0.585585	1660;2244;2309;2381;4947;5093	0.910021	0.483856	0.337926	0.908451	0.907634	1122;1268;3834;3906;3971;4555	0.809297	0.501973	0.416051	0.853755	0.851326
Ddx31	0.348291	1.34625	381;800;929;1668;1685;3237	2.19307	1.15345	0.0211256	0.203395	0.202231	2978;4530;4547;5286;5415;5834	1.36657	0.639628	0.128386	0.562455	0.561747
Ddx39	-0.217462	0.857892	2982;3218;3303;4016;5064;5248	0.960212	0.493919	0.304663	0.875906	0.875906	967;1151;2199;2912;2997;3233	1.70259	0.735216	0.0621365	0.388294	0.388294
Ddx3x	-0.435437	1.34319	766;2640;4937;5519;5818;6207	1.06024	0.500197	0.246551	0.834945	0.833992	8;397;696;1278;3575;5449	2.11493	1.15094	0.0255012	0.235922	0.235922
Ddx41	0.526805	1.70768	182;497;712;920;1289;3418	2.73841	1.46287	0.00598551	0.0819174	0.081072	2797;4926;5295;5503;5718;6033	1.75948	0.788528	0.055192	0.364135	0.364135
Ddx42	0.535101	1.49907	104;425;859;1062;1947;3851	2.05569	1.28433	0.0290217	0.259784	0.258631	2364;4268;5153;5356;5790;6111	1.24587	0.640112	0.165769	0.61967	0.618726
Ddx46	-0.232108	0.931034	1088;1150;3756;5367;5950;5951	0.809443	0.459231	0.415999	0.958128	0.956917	264;265;848;2459;5065;5127	1.63987	0.7978	0.0713865	0.417724	0.417724
Ddx47	0.336336	0.982302	141;259;1022;1588;5380;5808	1.65801	0.841726	0.0686498	0.451127	0.451127	407;835;4627;5193;5956;6074	0.861568	0.527389	0.373534	0.819301	0.819301
Ddx49	-0.227284	0.802308	1014;1918;2845;4666;5846;6097	0.581934	0.365276	0.641675	1	0.990325	118;369;1549;3370;4297;5201	1.38295	0.687642	0.123947	0.553251	0.553251
Ddx50	-0.235093	0.786936	2320;2780;3212;3778;5225;5958	0.664609	0.390271	0.555513	1	0.990325	257;990;2437;3003;3435;3895	1.21718	0.674488	0.176258	0.640096	0.639326
Ddx51	-0.0508534	0.548143	623;2417;2781;2881;3517;5968	0.820333	0.442202	0.406705	0.949935	0.949935	247;2698;3334;3434;3798;5592	0.710599	0.469922	0.508686	0.907741	0.907345
Ddx54	0.513937	1.49362	118;258;767;872;1643;5972	2.36666	1.27949	0.0142778	0.154536	0.154536	243;4572;5343;5448;5957;6097	1.45579	0.741674	0.105882	0.506763	0.506763
Ddx56	0.2477	0.869156	266;668;1446;1485;3665;5489	1.54769	0.744855	0.0870906	0.524444	0.523225	726;2550;4730;4769;5547;5949	0.920312	0.423076	0.330635	0.795831	0.795831
Ddx6	-0.446869	1.8206	702;4343;5730;5873;5913;6147	2.1302	0.842223	0.0243998	0.225732	0.225322	68;302;342;485;1872;5513	3.32501	1.55919	0.001407	0.0347761	0.0347761
Dek	-0.228919	0.81336	2029;2792;2986;4977;5396;5644	0.611526	0.414261	0.610748	1	0.990325	571;819;1238;3229;3423;4186	1.09039	0.697082	0.23124	0.701344	0.701344
Dhx15	0.584248	1.78388	151;355;631;743;2121;2656	2.62405	1.52811	0.00799638	0.101084	0.0997122	3559;4094;5472;5584;5860;6064	1.63355	0.807629	0.0721787	0.419396	0.419185
Dhx29	2.31208	7.4479	18;23;24;28;30;32	13.7293	6.30723	0	0	0	6183;6185;6187;6191;6192;6197	10.7341	4.29398	0	0	0
Dhx30	0.446481	1.07015	88;213;1831;3148;3344;3868	1.81448	0.917005	0.0490833	0.364493	0.364493	2347;2871;3067;4384;6002;6127	0.76426	0.434905	0.456628	0.882352	0.87948
Dhx33	0.109403	0.608863	353;786;1673;2963;5000;5515	0.854732	0.521938	0.378981	0.925652	0.925652	700;1215;3252;4542;5429;5862	0.619451	0.375903	0.602291	0.934765	0.934765
Dhx34	-0.0214604	0.584802	1275;1696;2561;3443;3996;4450	0.870067	0.501294	0.367214	0.922771	0.921077	1765;2219;2772;3654;4519;4940	0.597866	0.441757	0.625072	0.940163	0.938757
Dhx36	-0.233469	0.808484	1654;2214;2314;4860;5672;6035	0.592914	0.382441	0.630188	1	0.990325	180;543;1355;3901;4001;4561	1.0999	0.692945	0.226668	0.705568	0.70015
Dhx57	-0.04326	0.540528	785;1324;3903;4083;4249;4939	0.598393	0.459866	0.6245	1	0.990325	1276;1966;2132;2312;4891;5430	0.94561	0.463355	0.313937	0.780601	0.779778
Dhx8	-0.112496	0.687193	622;1874;2006;2968;5908;6029	0.679978	0.429794	0.53976	1	0.990325	186;307;3247;4209;4341;5593	1.52439	0.589004	0.0912729	0.46795	0.46795
Dhx9	-0.0861957	0.555723	858;2644;3155;3288;3987;5743	0.631125	0.408452	0.59	1	0.990325	472;2228;2927;3060;3571;5357	0.79603	0.476394	0.427671	0.860539	0.860539
Dido1	0.308904	1.28017	505;698;1096;1848;1901;3055	1.95239	1.09687	0.0362331	0.301518	0.29997	3160;4314;4367;5119;5517;5710	1.19936	0.616566	0.183245	0.647023	0.647023
Dmap1	0.691097	1.81861	48;331;358;1838;1935;2444	2.49475	1.55789	0.0107464	0.122731	0.122731	3771;4280;4377;5857;5884;6167	1.466	0.775407	0.103585	0.500105	0.500105
Dnajc1	0.0168086	0.589475	739;1768;2773;3251;3581;4725	0.791604	0.505303	0.431636	0.965932	0.965932	1490;2634;2964;3442;4447;5476	0.551306	0.40684	0.673161	0.960995	0.947905
Dnajc2	-0.507372	1.78623	2799;4611;4706;5874;5955;6132	1.44544	0.769342	0.108272	0.587862	0.583523	83;260;341;1509;1604;3416	2.55435	1.53005	0.00920048	0.132487	0.131724
Dnd1	-0.22943	0.860356	1118;4002;4113;4223;4341;5995	1.00044	0.449423	0.279865	0.85351	0.852614	220;1874;1992;2102;2213;5097	1.655	0.737332	0.0689746	0.412354	0.412302
Dnmt1	-0.426529	1.70833	751;2099;5303;6050;6120;6121	2.02743	0.7787	0.0306244	0.266916	0.266916	94;95;165;912;4116;5464	3.46169	1.46246	0.00105435	0.028623	0.0282258
[truncated: 861 more rows]

## Sheet: S2d. LLC invitro_D15 vs input
	Fold-change		STARS - enriched						STARS depleted
[truncated: 1,058 more rows]

## Sheet: S2e. B16 WT_GVAX_PD1 vs NSG
	Fold-change		STARS - enriched						STARS depleted
[truncated: 1,058 more rows]

## Sheet: S2f. B16 WT_notx vs NSG
	Fold-change		STARS - enriched						STARS depleted
[truncated: 1,058 more rows]

[truncated: 2 more sheets: S2g. B16 NSG vs in_vitro_D12, S2h. B16 in_vitro_D15 vs input]
